# Supplementary material for: GWAS metanalysis of atrial fibrillation reveals significant sex-related heterogeneity effects of the PITX2 and CFL2 loci
Source: Research Square preprint supplement (doi:10.21203/rs.3.rs-7978651/v1), 2025-11-20
Supplement: Supplementary file 1 [file 3d3053c2314b3cef65477858.xlsx]

## Sheet: T. Cont.
TABLE OF CONTENTS
Supplementary Table S1. Software and data used in the present study.
Supplementary Table S2. Detailed number of individuals included form each participant Hospital on the replication cohort.
Supplementary Table S3. Clinical description of replication cohort. AF: Atrial fibrillation patients.
Supplementary Table S4. Detailed number of participants (AF and controls) included from each project. AF: Atrial fibrillation patients.
Supplementary Table S5. Metanalysis of AF and sex stratified GWAS results in the replication cohort.
Supplementary Table S6. Plasma proteomic analysis evaluating the interaction between rs6843082 and sex adjusting by age, stratifying by atrial fibrillation status.
Supplementary Table S7. Plasma proteomic analysis evaluating the interaction between rs6571678 and sex adjusting by age, stratifying by atrial fibrillation status.
Supplementary Table S8. Pathways modulated by the plasma protein showing heterogenety between atrial fibrillation status and sex-heterogenous variants.
Supplementary Table S9. Evaluation of confounding factors for the replicated varians
Supplementary Table S10. Performance of PRS in test cohort

## Sheet: Sup 1
Supplementary Table S1. Software and data used in the present study.
REAGENT/RESOURCE	SOURCE	IDENTIFIER
Deposited data
UKBB summary statistics	http://www.nealelab.is/uk-biobank	Diagnoses: main ICD10: I48 atrial fibrillation and flutter; files: I48.gwas.imputed_v3.female.tsv.bgz
		I48.gwas.imputed_v3.male.tsv.bgz
		Smoking status: Current; files: 20116_2.gwas.imputed_v3.both_sexes.tsv.bgz
		Weight; files: 21002_raw.gwas.imputed_v3.both_sexes.tsv.bgz
		Standing height; files:
		50_raw.gwas.imputed_v3.both_sexes.tsv.bgz
		Hypertension; files: I9_HYPTENS.gwas.imputed_v3.both_sexes.tsv.bgz
		Type 2 diabetes; files: E4_DM2.gwas.imputed_v3.both_sexes.tsv.bgz
		Body mass index (BMI); files: 21001_raw.gwas.imputed_v3.both_sexes.tsv.gz
		Cholesterol (mmol/L); files: 30690_raw.gwas.imputed_v3.both_sexes.varorder.
		LDL direct (mmol/L); files: 30780_raw.gwas.imputed_v3.both_sexes.varorder.tsv.bgz
Replication data	This paper
GWAS Catalog	https://www.ebi.ac.uk/ gwas/	N/A
Software and algorithms
METAL	Willer et al., 2010	https://csg.sph.umich.edu/abecasis/metal/
R	https://www.r-project.org	v3.18
PRSice-2	https://choishingwan.github.io/PRSice/	v2.3.3
LDpred-2 and lassosum2 with bigsnpR R package	https://privefl.github.io/bigsnpr/articles/LDpred2.html6–8	v1.12.15

## Sheet: Sup 2
Supplementary Table S2. Detailed number of individuals included form each participant Hospital on the replication cohort.
Hospitals (City)	Total	AF	AF Controls
Hospital Universitari Vall d'Hebron (Barcelona)	1530	368	1162
Hospital Clínico Universitario de Santiago (Galicia)	585	125	460
Hospital del Mar (Barcelona)	577	251	326
Hospital Universitari Germans Tries i Pujol (Badalona)	358	111	247
Hospital Universitari Son Espases (Palma de Mallorca)	253	42	211
Hospital de la Santa Creu i Sant Pau (Barcelona)	228	81	147
Hospital Universitari Mútua de Terrassa (Terrassa)	267	50	217
Complejo Hospitalario Universitario de Albacete (Albacete)	191	59	132
Hospital Universitario Virgen del Rocio Y Virgen Macarena (Sevilla)	120	46	74
Hospital Clinic de Barcelona (Barcelona)	109	33	76
Hospital Universitario Río Hortega (Valladolid)	50	18	32
Hospital Universitario de Cruces (Bilbao)	35	7	28
Hospital Universitario de Basurto (Bilbao)	25	6	19
Hospital Universitario de la Paz (Madrid)	14	6	8
Hospital Universitario Doctor Josep Trueta (Girona)	11	0	11
Hospital Universitario de La Princesa (Madrid)	3	1	2
Hospital Arnau de Vilanova (Lleida)	3	3	0
GCAT Project	4887		4887
CEGEN Project	3368		3368
TOTAL	12614	1207	11407
AF: Atrial Fibrillation

## Sheet: Sup 3
Supplementary Table S3. Clinical description of replication cohort. AF: Atrial fibrillation patients.
	Sex (%F)	Age (Years. IQR)	DM (%)	HTN (%)	DL (%)	IS (%)
Total (12614)	6276 (50%)	55 (46-67)	1086 (25%)	3732 (41%)	1120 (44%)	3456 (39%)
AF (1207)	669 (55%)	79 (72-84)	332 (28%)	923 (77%)	305 (41%)	1182 (98%)
AF Controls (11407)	5607 (49%)	53 (46-63)	754 (24%)	2809 (35%)	815 (46%)	2646 (23%)
P	3.88037e-05	< 2.2e-16	0.0179164	2.41719e-166	0.035371	< 2.2e-16
Total females (6276)		55 (47-69)	460 (23%)	1783 (38%)	477 (40%)	1730 (28%)
AF females (669)		81 (75-85)	180 (27%)	526 (79%)	169 (41%)	657 (98%)
AF Controls females (5607)		53 (46-63)	280 (%)	1257 (31%)	308 (40%)	1073 (19%)
P_f		< 2.2e-16	0.0029965	9.64744e-124	0.818	< 2.2e-16
Total males (6338)		55 (46-66)	626 (27%)	1949 (44%)	643 (48%)	2098 (33%)
AF males (538)		76 (69-82)	152 (29%)	397 (74%)	136 (41%)	525 (98%)
AF Controls males (5800)		53 (45-63)	474 (27%)	1552 (39%)	507 (50%)	1573 (27%)
P_m		3.71474e-210	0.382327	1.40173e-52	0.00693632	2.35316e-241

## Sheet: Sup 4
Supplementary Table S4. Detailed number of participants (AF and controls) included from each project. AF: Atrial fibrillation patients.
Name	Array	Total	AF	AF controls
GCAT	Illumina® Infimum Multi-Ethnic Global consortium array	4887		4887
GENISIS	Illumina® Human Core Exome chip	2206	626	1580
GODS	Illumina® Human Core Exome chip	635	211	424
CONIC	Illumina® Human Core Exome chip	279	59	220
ISSYS	Illumina® Human Core Exome chip	316	17	299
SEDMAN	Illumina® Human Core Exome chip	107	76	31
	Axiom Spain Biobank Array	166	51	115
GRECOS	Illumina® Human Core Exome chip	116	7	109
GENOTPA	Illumina® Omni 1.5M	162	67	95
SANT PAU HOSPITAL	Axiom Spain Biobank Array	87	23	64
IBIOSTROKE	Axiom Spain Biobank Array	35	4	31
COLISEUM	Axiom Spain Biobank Array	250	66	184
CEGEN	Axiom Spain Biobank Array	3368		3368
TOTAL		12614	1207	11407

## Sheet: Sup 5
Supplementary Table S5. Metanalysis of AF and sex stratified GWAS results in the replication cohort.
												AF female GWAS					AF male GWAS
MarkerName	Variant ID	r2 with lead variant	Gene	EA	OA	Neff	Zscore	P-value	Direction	HetISq	HetPVal	AF1	BETA	SE	P	Neff	AF1	BETA	SE	P	Neff
14:35185345:A:G	rs6571678	NA	CFL2	A	G	4360.08	-1.529	0.1264	+-	83.3	0.01434	0.155832	0.00338898	0.00659618	0.607406	2390.75	0.15983	-0.0175181	0.00616726	0.00450418	1969.33
1:170193825:G:C	rs72700114	NA	NTMT2	C	G	4360.08	-0.47	0.6387	-+	70.6	0.06525	0.0623805	-0.015592	0.00982701	0.112594	2390.75	0.0657936	0.00958552	0.00913272	0.293911	1969.33
2:201183888:G:A	rs7605146	NA	SPATS2L	A	G	4360.08	0.665	0.506	++	0	0.4769	0.372132	7.16601e-05	0.00492669	0.988395	2390.75	0.365257	0.00452814	0.00465053	0.330214	1969.33
4:111718067:G:A	rs6843082	NA	PITX2	A	G	4360.08	-6.639	3.151e-11	--	90.8	0.001007	0.237173	-0.0152833	0.00564753	0.00680591	2390.75	0.232644	-0.0366296	0.00531076	5.30207e-12	1969.33
10:104057251:A:C	rs2246775	NA	GBF1	A	C	4360.08	-1.952	0.05094	--	0.018	0.8943	0.378744	-0.00763955	0.0049779	0.124859	2390.75	0.380719	-0.00566801	0.004671	0.224959	1969.33
2:179421294:C:T	rs35504893*	0.94	TTN	T	C	4360.08	0.961	0.3364	++	0	0.5807	0.221479	0.00616461	0.00569131	0.278737	2390.75	0.220495	0.00130763	0.0055158	0.812603	1969.33
* Variant in high LD with the lead variant rs3731747 in IBS population of 1000G

## Sheet: Sup 6
Supplementary Table S6. Plasma proteomic analysis evaluating the interaction between rs6843082 (PITX2) and sex adjusting by age, stratifying by atrial fibrillation status.
protein	beta.af	se.af	pval.af	n.af	betanon.af	senon.af	pvalnon.af	nnon.af	Z_het	p_het
myl1	0.207293	0.0557553	0.000213887	865	-0.00760299	0.00772137	0.324793	37510	3.81784	0.000134628
tp53inp1	0.126823	0.0385441	0.00103476	1030	-0.00572941	0.00606957	0.345197	44275	3.39712	0.00068098
h2ap	-0.185789	0.0590681	0.0017162	862	0.00391989	0.00965625	0.684787	37377	-3.16962	0.00152637
lacrt	-0.189553	0.0604065	0.00175764	890	-0.00165332	0.00939092	0.860251	38537	-3.07366	0.00211448
hras	-0.402159	0.124495	0.00128257	881	-0.0196722	0.0187137	0.293163	38039	-3.03818	0.00238012
cep290	-0.205518	0.0677141	0.00247551	884	0.00102635	0.010054	0.91869	38105	-3.01717	0.00255149
sult1a1	-0.479512	0.153685	0.00185697	1060	-0.0161105	0.0246801	0.513907	45500	-2.97713	0.00290961
znrd2	-0.254296	0.080572	0.00165262	893	-0.0130036	0.0133539	0.33018	38629	-2.95444	0.00313232
gpr101	-0.201378	0.0703627	0.00431171	867	0.00542105	0.0116002	0.64027	37546	-2.8999	0.00373283
mtus1	0.167871	0.062341	0.00722066	884	-0.0104655	0.0108251	0.33366	38105	2.81848	0.0048251
sec31a	-0.259065	0.0884023	0.00347199	880	-0.00661546	0.0147692	0.654211	37767	-2.81665	0.0048528
fst	0.156936	0.0579277	0.00685508	1053	-0.00715213	0.00967928	0.459964	45235	2.79391	0.00520756
reg3g	-0.142005	0.0490889	0.00391153	893	-0.00555754	0.00753297	0.460663	38610	-2.74743	0.00600647
scgn	-0.141161	0.0534084	0.0083401	1042	0.00676565	0.00841274	0.421277	44249	-2.736	0.00621918
ube2b	-0.0959786	0.0358412	0.0075457	893	0.00319895	0.00558646	0.566902	38610	-2.73412	0.00625464
apobr	-0.124014	0.0485417	0.0107932	880	0.0101553	0.00822266	0.216825	37767	-2.72518	0.00642657
sult2a1	0.193556	0.0704231	0.00609046	1050	-0.000198568	0.0109209	0.985493	45034	2.7188	0.00655198
myo6	-0.136412	0.048401	0.00493394	894	-0.00351855	0.00702466	0.616455	38726	-2.71721	0.00658356
brd1	-0.0890327	0.0361882	0.0140748	884	0.0103207	0.00589516	0.0800048	38105	-2.70974	0.00673357
ngf	-0.0445695	0.0143658	0.00197102	1041	-0.00521323	0.0023373	0.0257222	44759	-2.70403	0.00685037
kcnip4	0.150977	0.0557772	0.00690718	1025	-0.00185159	0.00965343	0.847895	44031	2.69985	0.00693709
stk24	-0.177722	0.0700345	0.0113085	1025	0.011466	0.0118948	0.335076	44031	-2.66321	0.00773986
maea	0.122009	0.0425513	0.0042244	1028	0.00689947	0.00760003	0.363978	44017	2.66305	0.00774367
uxs1	0.159736	0.0613511	0.00935745	1028	-0.00401202	0.0100696	0.690316	44017	2.6338	0.00844357
arl2bp	-0.115733	0.0460286	0.0121062	865	0.00599409	0.0078224	0.443519	37510	-2.60721	0.00912837
fgf9	-0.125759	0.0470334	0.00764264	859	-0.00252371	0.00779536	0.746133	37316	-2.58489	0.00974092
il5	0.451103	0.163466	0.00588907	1042	0.0252757	0.02716	0.352054	44249	2.56975	0.0101771
ppp1r14a	-0.234716	0.091282	0.0102924	894	0.00230702	0.0150214	0.87794	38726	-2.56214	0.0104028
casp4	0.495845	0.196387	0.0117501	884	-0.0114962	0.0321731	0.720851	38105	2.54939	0.0107911
cacnb3	-0.253697	0.0938232	0.00698208	894	-0.0118694	0.0162493	0.465116	38726	-2.53968	0.0110955
sftpa1	0.164862	0.0637275	0.0098189	1028	0.00090476	0.0110265	0.934605	44017	2.53512	0.0112408
pzp	0.138093	0.0515285	0.00749926	898	0.00512559	0.0103096	0.619074	38862	2.53032	0.011396
dapp1	-0.394396	0.150939	0.00910547	1050	-0.00878909	0.0230928	0.703503	45034	-2.52533	0.0115589
gorasp2	-0.140396	0.0539884	0.00946372	893	-0.00310635	0.00902395	0.730672	38629	-2.50816	0.0121362
nrtn	0.134072	0.054911	0.0147878	1042	-0.00564202	0.00962179	0.557624	44249	2.50619	0.0122042
tlr1	-0.0858164	0.0320501	0.00755816	859	-0.00456217	0.00504109	0.365472	37668	-2.50444	0.0122647
siglec5	0.373641	0.154444	0.0157223	1047	-0.0163643	0.0219338	0.455625	45114	2.50013	0.0124146
acp1	0.133956	0.0541774	0.0136096	859	-0.00254203	0.00869054	0.769902	37668	2.48766	0.0128588
siglec8	0.142164	0.060372	0.0187528	880	-0.00900613	0.0088097	0.306647	37767	2.47773	0.013222
ggh	-0.10789	0.0443679	0.0151981	1030	0.00300586	0.00692244	0.664132	44344	-2.46958	0.0135271
crebzf	-0.0814105	0.030465	0.00767728	862	-0.00539923	0.00499616	0.279849	37377	-2.46214	0.0138109
lat2	-0.36571	0.144517	0.0115346	1043	-0.0056665	0.0241151	0.814228	44888	-2.45738	0.0139954
fyb1	-0.265367	0.109936	0.0159577	1046	0.00656902	0.0177366	0.711112	45040	-2.442	0.014606
serpinb9	-0.0961419	0.0399591	0.0163023	1041	0.00248862	0.00636655	0.69588	44759	-2.43754	0.0147875
mitd1	-0.288725	0.114809	0.0120592	1041	-0.0052279	0.018711	0.779937	44759	-2.43715	0.0148036
ccdc134	-0.139658	0.0577299	0.0157566	893	0.00266172	0.00930968	0.77495	38610	-2.43382	0.0149405
prame	-0.0801324	0.028318	0.00476753	862	-0.0104621	0.00487968	0.0320386	37377	-2.42455	0.0153273
src	-0.361969	0.144791	0.0125737	1050	-0.00743548	0.0231258	0.747815	45177	-2.41794	0.0156086
gla	-0.101198	0.0449667	0.024664	880	0.00894121	0.00747875	0.23188	37879	-2.41616	0.015685
kif22	-0.35074	0.145096	0.0158429	865	0.0030728	0.0234255	0.895639	37510	-2.40731	0.0160704
pde1c	-0.134902	0.0603051	0.0255428	862	0.0124537	0.0106061	0.240321	37377	-2.40658	0.0161029
lgals8	-0.172551	0.070364	0.014357	1060	-0.00138374	0.0116595	0.905529	45500	-2.39988	0.0164005
stxbp1	-0.206197	0.090243	0.0225529	894	0.0131628	0.014801	0.373839	38726	-2.39872	0.0164525
txlna	-0.253641	0.101704	0.0127897	1041	-0.00634245	0.0172475	0.713075	44759	-2.39731	0.0165157
ccl7	0.18179	0.075233	0.0158471	1050	0.000634481	0.0114462	0.955795	45034	2.38053	0.0172877
cpa2	-0.198452	0.0810526	0.0145101	1057	-0.00330494	0.0124771	0.791103	45352	-2.37963	0.0173299
dclre1c	-0.0778509	0.0333719	0.0198877	862	0.00258099	0.00602598	0.668427	37377	-2.37181	0.0177011
tnr	-0.13473	0.0540893	0.0128981	1041	-0.0052409	0.00826803	0.526166	44759	-2.36651	0.0179569
prtfdc1	-0.332783	0.135583	0.0142756	1025	-0.0082007	0.0214783	0.702602	44031	-2.3645	0.0180547
bin2	-0.241769	0.103802	0.0200428	1047	0.00709413	0.0175306	0.68572	45114	-2.36399	0.0180791
dnm1	-0.344066	0.135625	0.0113543	893	-0.0200788	0.0217295	0.355474	38629	-2.35876	0.018336
tpsg1	-0.0873711	0.03823	0.0225335	859	0.00354929	0.00514943	0.490665	37668	-2.35696	0.0184253
pmvk	-0.32903	0.136814	0.0163531	1022	-0.00383498	0.0208977	0.854397	43961	-2.34965	0.0187909
ptpn6	-0.266179	0.108818	0.0146047	1053	-0.00764971	0.0170995	0.654614	45235	-2.347	0.0189252
nudt16	-0.237648	0.0983136	0.0158396	891	-0.00412203	0.0167947	0.80612	38560	-2.3414	0.0192117
terf1	-0.0829922	0.0374589	0.026985	859	0.00540516	0.00567033	0.340477	37668	-2.33327	0.019634
pla2g15	-0.0781458	0.0348404	0.0251076	1052	0.00381033	0.00521645	0.465122	45247	-2.3264	0.0199973
brsk2	-0.106588	0.0406141	0.00882908	894	-0.011194	0.00737238	0.12893	38726	-2.31102	0.020832
grik2	-0.116553	0.0493174	0.0183263	894	-0.00193539	0.00801821	0.809266	38726	-2.29396	0.021793
tlr4	-0.0788193	0.0356564	0.0273334	859	0.0033189	0.00543078	0.541118	37668	-2.27734	0.022766
insl4	-0.160764	0.0682472	0.0187085	893	-0.00450425	0.00956414	0.637678	38610	-2.26746	0.0233621
eif2ak2	-0.276379	0.122088	0.0238301	888	0.00409031	0.0211278	0.846491	38498	-2.26363	0.023597
lilra6	0.195161	0.0844785	0.0211047	900	0.00184698	0.0139479	0.894653	38800	2.25775	0.023961
kirrel1	0.149567	0.0661245	0.0239515	867	-0.00146672	0.0112187	0.895982	37546	2.25191	0.0243281
c1qtnf9	-0.114796	0.0554813	0.0388313	878	0.0114672	0.00920843	0.213031	37879	-2.24507	0.0247639
fdx1	0.185623	0.0832891	0.0260947	865	-0.00265819	0.0121072	0.82622	37510	2.23706	0.0252826
fshb	-0.141013	0.0606385	0.0202748	880	-0.00267253	0.0123923	0.829253	37767	-2.2352	0.0254045
smpdl3b	-0.210592	0.0878515	0.0167293	893	-0.0116577	0.014483	0.420866	38610	-2.23429	0.0254643
stc1	-0.13281	0.0601352	0.027422	1060	0.00287546	0.00853011	0.736046	45500	-2.23398	0.0254844
tpd52l2	-0.298092	0.126794	0.0189449	880	-0.0124751	0.0207594	0.547883	37950	-2.223	0.026216
arfip1	-0.180527	0.0759918	0.0177312	894	-0.00942537	0.0132124	0.47562	38726	-2.2183	0.0265347
vps4b	-0.252752	0.107266	0.0186739	893	-0.0116816	0.0181483	0.519791	38610	-2.21592	0.0266972
hsbp1	-0.22525	0.107595	0.0365918	880	0.0161992	0.0182378	0.374427	37767	-2.2125	0.0269322
hs6st1	-0.0791772	0.039817	0.0470111	1060	0.0100879	0.00654368	0.123172	45479	-2.21221	0.0269521
hspa2	0.0890641	0.0404389	0.0278909	893	-0.001475	0.00648938	0.820196	38610	2.21063	0.0270617
sarg	-0.290087	0.124503	0.0200315	893	-0.0113798	0.0211047	0.589746	38656	-2.20707	0.0273089
xpnpep2	-0.242016	0.11605	0.0372706	1052	0.0153119	0.0186775	0.412332	45247	-2.18922	0.0285811
plxna4	-0.218661	0.0973756	0.0249418	1050	-0.00290265	0.0156429	0.852793	45034	-2.18768	0.0286927
gfra3	-0.0838127	0.0376067	0.026051	1038	-0.000722547	0.00539683	0.893495	44627	-2.18704	0.0287394
scp2	0.199617	0.083958	0.0176095	1028	0.0134027	0.0148464	0.366659	44017	2.18406	0.0289576
lilra4	0.140668	0.064569	0.0296345	865	-0.0017935	0.00975875	0.854184	37510	2.18157	0.0291412
clip2	-0.306013	0.134924	0.0235308	1050	-0.00790918	0.0218962	0.717943	45034	-2.18088	0.0291923
st8sia1	0.134241	0.0623012	0.0314639	859	-0.00264365	0.00937301	0.777907	37668	2.17269	0.0298038
vasp	-0.195342	0.0818617	0.0172284	900	-0.0149607	0.0139281	0.282766	38840	-2.17227	0.0298352
eif4g3	-0.161377	0.0700175	0.0214068	894	-0.00679787	0.0127606	0.594228	38726	-2.17195	0.0298597
rrm2b	-0.161659	0.0746241	0.030518	1028	0.00205113	0.013027	0.874889	44017	-2.16111	0.0306867
dnajb14	-0.149422	0.0710903	0.0358466	893	0.00646548	0.0124661	0.604012	38629	-2.15985	0.0307841
plekho1	-0.184248	0.0788234	0.0196355	895	-0.0117027	0.0134675	0.384878	38704	-2.15774	0.0309482
cela3a	-0.154914	0.0747194	0.0383881	1063	0.00765755	0.0108531	0.480462	45589	-2.15317	0.0313056
cd109	-0.0910647	0.0396734	0.0219104	1047	-0.0048096	0.0063266	0.447128	45114	-2.147	0.031793
rab2b	-0.156619	0.0692136	0.0238867	893	-0.00590083	0.0117454	0.615393	38610	-2.14689	0.0318023
il24	-0.120038	0.0547291	0.0285065	1042	-0.00100531	0.00921074	0.913088	44249	-2.14478	0.0319706
bcl2l1	-0.263871	0.116206	0.0234021	895	-0.0114549	0.0189723	0.546002	38704	-2.14376	0.0320519
nudt10	-0.0635148	0.0284184	0.0256699	880	-0.00168214	0.00497518	0.735285	37767	-2.1432	0.0320971
yes1	-0.30764	0.134349	0.0222298	1043	-0.0159278	0.0220292	0.469663	44888	-2.14268	0.0321385
wdr46	0.0744082	0.0390857	0.0572698	893	-0.0105754	0.00711068	0.136957	38610	2.13918	0.0324215
gbp4	0.103358	0.0531308	0.0520075	1025	-0.0119427	0.00935571	0.201779	44031	2.13725	0.0325779
arhgef1	-0.245018	0.103481	0.0181097	895	-0.0209898	0.0173218	0.225613	38704	-2.1352	0.0327444
tars1	-0.0869811	0.0425227	0.0410976	893	0.00492343	0.00713019	0.489881	38610	-2.13155	0.0330441
sytl4	-0.192445	0.0822613	0.019532	900	-0.0146999	0.014034	0.294897	38800	-2.12996	0.0331747
plcb2	-0.263133	0.114573	0.0218706	895	-0.0161102	0.0187305	0.389738	38704	-2.12779	0.0333547
mgll	-0.232681	0.104859	0.0267017	1053	-0.0068156	0.0167145	0.683448	45235	-2.12713	0.0334094
tspan7	-0.260969	0.110258	0.018158	867	-0.0234122	0.0182092	0.198543	37546	-2.12576	0.0335231
yars1	-0.380421	0.172491	0.0276778	893	-0.0106861	0.0280996	0.703731	38629	-2.11561	0.0343777
hdac8	0.133552	0.0648712	0.0398234	859	-0.00602727	0.012066	0.617413	37668	2.11536	0.0343996
adamts13	-0.0576942	0.0296116	0.0516353	1064	0.0056105	0.00441852	0.204174	45660	-2.11442	0.0344791
defb104a_defb104b	0.123681	0.0661513	0.0618683	867	-0.0173559	0.0106825	0.104236	37546	2.10477	0.0353113
itpr1	0.192476	0.0881249	0.0292179	880	0.00502292	0.0132795	0.705249	37767	2.10338	0.0354326
morf4l1	-0.0832526	0.0405319	0.0402709	884	0.00353756	0.0077443	0.64782	38105	-2.10323	0.0354455
arhgap45	-0.208586	0.0929025	0.0250037	880	-0.0104992	0.0159309	0.509867	37950	-2.10152	0.0355952
rhoc	-0.304388	0.140347	0.030325	1031	-0.00581839	0.0224804	0.795775	44503	-2.10059	0.0356768
lyn	-0.217655	0.0997568	0.0293439	1043	-0.00547746	0.0163357	0.737396	44888	-2.09899	0.0358177
ppm1f	-0.128714	0.0585923	0.0282919	900	-0.00414985	0.0101414	0.682396	38800	-2.09481	0.0361881
vash1	-0.215464	0.0940654	0.0221864	1050	-0.0158872	0.0156726	0.310735	45034	-2.09283	0.0363643
aldh1a1	0.148686	0.0651995	0.0227809	1047	0.0105211	0.0106361	0.322574	45114	2.09146	0.036487
entpd6	-0.0702615	0.0342167	0.0402845	1030	0.00215038	0.00530079	0.684985	44275	-2.09133	0.0364988
fam171a2	0.408335	0.191515	0.03327	894	0.00296384	0.0301838	0.921779	38726	2.09084	0.0365422
sftpa2	0.131579	0.0680451	0.0534258	1028	-0.0122728	0.0101711	0.227575	44017	2.09083	0.036543
morf4l2	-0.0960048	0.0476764	0.0443554	862	0.00475458	0.00723503	0.511081	37377	-2.08948	0.0366643
gmfg	-0.179386	0.0817019	0.0283756	900	-0.00664202	0.0137968	0.630223	38800	-2.0848	0.0370873
eno1	-0.191136	0.0931291	0.0403824	1048	0.00414635	0.015089	0.783477	45046	-2.0699	0.0384613
bst2	0.141685	0.0703301	0.0442036	1060	-0.00521705	0.0100549	0.603862	45500	2.06772	0.0386663
ak2	-0.264281	0.119028	0.0266481	895	-0.0146886	0.0203561	0.470556	38704	-2.06691	0.0387427
apoa2	-0.139269	0.0645178	0.031145	900	-0.00453866	0.00931484	0.626084	38840	-2.06684	0.0387491
mesd	-0.305406	0.145241	0.0357267	1047	-0.00167388	0.0233311	0.942805	45114	-2.06476	0.0389458
tnfsf10	-0.0623626	0.0311438	0.0454967	1060	0.00260532	0.00499282	0.601803	45599	-2.05976	0.0394216
ctso	-0.0799566	0.0370731	0.0312522	1060	-0.00279445	0.00597222	0.639853	45599	-2.05486	0.0398925
ptpn1	-0.170732	0.0902197	0.058716	1041	0.0170033	0.0153052	0.266595	44759	-2.05156	0.0402128
inppl1	-0.237789	0.113296	0.0360733	1043	-0.00247704	0.0189838	0.896186	44888	-2.04841	0.0405202
gfap	-0.116621	0.0574313	0.0425525	1027	0.00233351	0.00889385	0.793035	43945	-2.04685	0.040673
amy2a	-0.130682	0.0606303	0.031366	1019	-0.00521215	0.00931847	0.575935	43380	-2.04541	0.0408146
hdgf	-0.218263	0.109304	0.0460987	1059	0.00814307	0.0180088	0.651147	45414	-2.04379	0.0409742
sfrp1	-0.12709	0.0601987	0.0349971	1039	-0.00315566	0.00846868	0.709428	44602	-2.03868	0.0414823
lcat	-0.065404	0.0287484	0.0231387	900	-0.00616865	0.00443142	0.163923	38840	-2.03642	0.0417077
rcor1	0.109775	0.0530804	0.0388828	1030	0.000233572	0.0087292	0.978653	44275	2.03633	0.0417174
nck2	-0.269577	0.125047	0.0313259	1053	-0.0120252	0.0203181	0.553956	45311	-2.03298	0.0420547
prcp	-0.0735204	0.0370097	0.0472342	1059	0.00275589	0.00627181	0.660367	45373	-2.03201	0.0421523
cntf	-0.0840347	0.0385896	0.0297024	867	-0.00461543	0.00653173	0.479808	37546	-2.02919	0.0424392
rab6b	0.103222	0.0547949	0.0598768	1025	-0.00936327	0.00916182	0.306793	44031	2.02654	0.0427092
casp3	-0.207983	0.101195	0.0400981	1064	-0.000566727	0.01692	0.97328	45660	-2.0216	0.0432174
ebag9	-0.226639	0.110789	0.0410393	1041	0.00027544	0.0182651	0.987968	44759	-2.02089	0.0432909
spry2	-0.240031	0.107686	0.0260277	1042	-0.0204897	0.0177863	0.249331	44249	-2.01147	0.0442756
lztfl1	-0.160694	0.0796542	0.043959	880	0.00135763	0.0137488	0.921341	37950	-2.0048	0.0449849
arhgef12	-0.247877	0.121617	0.0417835	1050	-0.00138288	0.0201923	0.945399	45034	-1.99944	0.0455612
mindy1	-0.266582	0.126961	0.0360357	893	-0.00980504	0.020779	0.637021	38610	-1.99593	0.0459416
tcn2	-0.0669129	0.0349205	0.0556152	1064	0.00360564	0.00573068	0.529233	45590	-1.99275	0.0462892
myl4	0.126743	0.0622629	0.0420908	880	0.00102122	0.0101999	0.920249	37767	1.99264	0.0463005
lamp1	0.0655392	0.0353333	0.0639529	869	-0.00562889	0.00533107	0.291037	37720	1.99165	0.0464091
lpl	-0.0990792	0.0550031	0.0719373	1052	0.0118904	0.00907207	0.18998	45128	-1.99062	0.0465228
dok1	-0.343317	0.160706	0.0329271	895	-0.0193936	0.026174	0.45873	38704	-1.98941	0.0466559
trim25	-0.258535	0.120247	0.0318214	893	-0.0157794	0.0209902	0.452205	38629	-1.98874	0.0467295
atp5if1	-0.256461	0.130784	0.0501501	1053	0.00678668	0.0211357	0.748136	45311	-1.98706	0.0469163
cd200r1	0.0737924	0.0412093	0.073636	1047	-0.00914218	0.00665537	0.169556	44884	1.98678	0.0469471
stat5b	-0.325328	0.160816	0.0433307	1043	-0.00208918	0.0263431	0.936789	44888	-1.98356	0.0473053
pomc	-0.150064	0.0843265	0.0754942	880	0.0192179	0.0134565	0.153256	37767	-1.98238	0.0474365
gopc	-0.257302	0.119705	0.0318274	1050	-0.0177031	0.0195303	0.364705	45034	-1.97545	0.0482174
cox6b1	-0.0815911	0.0380452	0.0322548	900	-0.00557733	0.00621942	0.369852	38800	-1.97181	0.0486309
tbcc	-0.181836	0.0942044	0.0538509	1041	0.00617199	0.0156168	0.692687	44759	-1.96888	0.0489672
mink1	-0.225909	0.107414	0.0357311	895	-0.0120516	0.0177596	0.497397	38704	-1.9643	0.0494949
hars1	-0.177751	0.0893238	0.0468559	1047	-2.23477e-05	0.0148356	0.998798	45114	-1.96283	0.0496664
pydc1	-0.105237	0.0513195	0.0406014	880	-0.00336085	0.00793518	0.671905	37767	-1.96182	0.0497837
chm	-0.134542	0.0661681	0.0423244	867	-0.00299033	0.011702	0.798307	37741	-1.95776	0.0502578
pltp	-0.0740088	0.0438668	0.0918746	1061	0.012654	0.00707905	0.0738581	45522	-1.95036	0.0511335
bmp10	-0.0634412	0.0381722	0.0968767	880	0.0117443	0.00554812	0.0342828	37950	-1.94916	0.0512767
metap2	-0.12398	0.0664867	0.0624977	1057	0.0073204	0.0110869	0.509079	45412	-1.94793	0.0514228
rps10	-0.0849721	0.0467285	0.0693476	865	0.00716277	0.00798951	0.369979	37510	-1.9435	0.0519555
rgs10	-0.125833	0.0672617	0.0617015	894	0.00671843	0.0114335	0.556797	38726	-1.94281	0.0520387
tnfsf13	0.0689067	0.0358849	0.0551023	1053	-0.00147822	0.00508998	0.771497	45311	1.94197	0.0521411
lrig1	0.0869908	0.0445036	0.0508843	1055	-0.000280512	0.00662106	0.966207	45346	1.93965	0.0524225
tsc22d1	-0.161437	0.0758915	0.0336773	894	-0.0123485	0.0128375	0.336103	38726	-1.93698	0.0527477
epn1	-0.0955161	0.0534007	0.0740129	884	0.00908562	0.00822427	0.269282	38105	-1.93598	0.0528701
brdt	-0.0836916	0.0418361	0.045764	865	-0.00156011	0.00706227	0.825165	37510	-1.93579	0.0528938
ndufb7	-0.225288	0.105012	0.032196	893	-0.019374	0.0170084	0.254675	38629	-1.93563	0.0529134
nxph1	0.0690615	0.0439725	0.116595	1025	-0.0171294	0.00736884	0.0200993	44031	1.93315	0.0532175
gc	0.0491403	0.0301375	0.103341	898	-0.00980939	0.00495963	0.0479533	38862	1.93006	0.0535989
vamp5	0.147989	0.0710506	0.0375105	1030	0.00968482	0.0103726	0.350468	44275	1.92614	0.0540865
il1rl2	-0.080019	0.0454125	0.0783557	1042	0.0086325	0.00750555	0.250089	44249	-1.92601	0.0541029
dtd1	-0.193776	0.0972227	0.0465587	880	-0.00393388	0.0167626	0.814457	37950	-1.92426	0.0543215
pstpip2	-0.255938	0.129289	0.0480726	853	-0.00409574	0.0208092	0.843967	36667	-1.92316	0.0544599
chmp6	-0.131746	0.0658229	0.0456374	900	-0.00348503	0.0108219	0.747428	38800	-1.92277	0.0545095
vipr1	-0.0584941	0.0296794	0.0490542	880	-0.000789728	0.00475738	0.868157	37767	-1.91975	0.0548895
ca3	0.152446	0.0754627	0.0436189	1063	0.00599158	0.0117045	0.608722	45587	1.91783	0.0551332
txndc5	-0.158774	0.0805715	0.0490314	1060	-0.00232039	0.0130836	0.859233	45500	-1.91669	0.0552773
fstl1	0.0618478	0.0300839	0.040094	880	0.00358807	0.00438663	0.413387	37767	1.91631	0.0553259
tmed4	-0.142208	0.0666084	0.0330442	865	-0.0129142	0.0107798	0.230922	37510	-1.91617	0.0553433
tbcb	-0.227392	0.118851	0.0559914	1041	0.00317269	0.019267	0.869205	44759	-1.91495	0.0554993
acrbp	-0.0838862	0.042363	0.0479923	893	-0.00156635	0.00744205	0.833299	38610	-1.91389	0.055634
c1qtnf5	0.101682	0.0479279	0.0341552	880	0.00901227	0.00714168	0.206983	37950	1.91241	0.0558239
eif1ax	-0.128249	0.0653032	0.0498531	895	-0.00195797	0.0105912	0.853333	38704	-1.90897	0.0562661
leg1	-0.148756	0.0876343	0.0899738	856	0.0203859	0.0131102	0.119964	36660	-1.90885	0.0562814
flt1	-0.0579717	0.0295009	0.0496723	1039	-0.00134281	0.00417991	0.748021	44817	-1.90058	0.057357
zp4	-0.0678849	0.0370454	0.0672268	862	0.00350961	0.00636605	0.581431	37377	-1.89938	0.0575149
pnpt1	0.247728	0.126726	0.0508701	1042	0.00312531	0.0229211	0.891545	44249	1.89936	0.057517
pcdh7	-0.0816917	0.0461355	0.0769553	893	0.00682621	0.00667675	0.306605	38629	-1.89887	0.0575818
c2cd2l	0.0908002	0.0462501	0.04989	1022	0.00178274	0.00823228	0.828557	43963	1.89492	0.0581036
galnt3	-0.0988304	0.0515077	0.0552904	1042	-8.305e-05	0.0081143	0.991834	44249	-1.89378	0.0582541
pagr1	-0.0848897	0.048706	0.0817026	880	0.00870886	0.00844611	0.302496	37767	-1.89345	0.0582987
grap2	-0.308585	0.153046	0.0440245	1052	-0.0153717	0.0246493	0.532883	45128	-1.89148	0.0585606
tpsd1	-0.0893894	0.0458676	0.0516265	894	-0.00162415	0.00707031	0.818315	38726	-1.89111	0.0586092
tfpi	0.0765203	0.0395188	0.0531008	1048	0.000998832	0.00601122	0.868031	44994	1.88929	0.0588525
cacybp	-0.240426	0.119358	0.0442806	880	-0.0122168	0.0198112	0.537463	37879	-1.88617	0.0592722
tnpo1	-0.0925123	0.0507051	0.0684134	884	0.00395203	0.00670017	0.555301	38105	-1.88606	0.0592865
pacs2	-0.128504	0.0689195	0.0625838	865	0.00318136	0.0120677	0.792069	37510	-1.88208	0.0598245
mdga1	-0.168732	0.083072	0.0424938	1041	-0.0103783	0.0133775	0.437868	44759	-1.88198	0.0598386
epcam	0.235553	0.110345	0.0330172	1052	0.0255969	0.0186483	0.169879	45083	1.87613	0.060638
clpp	-0.217949	0.112404	0.0527762	1038	-0.00434933	0.0183644	0.812786	44691	-1.87542	0.0607352
extl1	-0.104403	0.0603294	0.083891	865	0.0100231	0.0091623	0.273984	37510	-1.87519	0.0607671
lrrc59	-0.119423	0.0570996	0.0367651	900	-0.0110051	0.00917819	0.230515	38800	-1.8747	0.0608346
gnly	-0.132037	0.0641404	0.0397847	1047	-0.010429	0.00994647	0.294406	45114	-1.87357	0.06099
ap1g2	-0.195354	0.092146	0.0342784	893	-0.0203106	0.0155096	0.190356	38610	-1.87328	0.061029
pcsk9	-0.08645	0.0491535	0.0789041	1064	0.00653098	0.00762951	0.391993	45660	-1.86926	0.0615862
pla2g4a	-0.201102	0.10114	0.0470324	1053	-0.0101421	0.0168735	0.5478	45311	-1.86234	0.0625558
skap2	-0.226723	0.121154	0.0615733	1053	0.00161595	0.0201718	0.936151	45311	-1.85911	0.0630119
pla2g1b	-0.112253	0.0587669	0.0563855	1063	-0.00194419	0.00824956	0.813688	45587	-1.85883	0.0630512
gpa33	0.329368	0.158479	0.0379268	1043	0.0310427	0.0259718	0.231996	44888	1.85764	0.0632197
cmc1	-0.213113	0.106142	0.0449626	900	-0.0133885	0.0173917	0.441409	38800	-1.85692	0.0633227
pde5a	-0.252538	0.121452	0.0378786	880	-0.0240241	0.0200826	0.231602	37950	-1.85631	0.0634097
dbnl	-0.203695	0.107925	0.0593864	1053	-0.000733735	0.0178733	0.967255	45311	-1.8553	0.0635528
dnmbp	-0.116059	0.0675197	0.0859329	1041	0.0112111	0.0121347	0.355552	44759	-1.85521	0.0635663
pla2g10	-0.118263	0.069213	0.0878088	1041	0.0118952	0.0115445	0.302836	44759	-1.85492	0.0636072
adamts8	-0.105432	0.0571988	0.0655741	1052	0.00188238	0.00874101	0.829495	45247	-1.85463	0.0636484
atg16l1	-0.1863	0.0967495	0.054474	893	-0.00435372	0.0164415	0.791165	38629	-1.85401	0.0637371
prkar2a	-0.180278	0.0916103	0.049393	893	-0.00803955	0.0157879	0.610599	38631	-1.85281	0.0639102
cd164	-0.067233	0.0366386	0.0667856	1047	0.00126653	0.00514376	0.805507	45114	-1.85145	0.0641055
otoa	-0.111697	0.0551106	0.0429927	867	-0.00811979	0.0101472	0.423598	37546	-1.84837	0.0645488
cit	0.118182	0.0570716	0.0386781	867	0.0114142	0.00896012	0.202711	37741	1.84813	0.0645839
rbm17	-0.168292	0.0867507	0.0527018	894	-0.00577018	0.0146171	0.693026	38726	-1.84739	0.06469
cirbp	-0.214212	0.112334	0.0568544	893	-0.00398365	0.018331	0.827962	38629	-1.84702	0.0647442
ppp1r12a	-0.212299	0.113469	0.0616262	1052	-6.45111e-05	0.0184582	0.997211	45247	-1.84615	0.0648708
map4k5	-0.250251	0.132021	0.0583	1038	-0.0034258	0.021547	0.873676	44691	-1.84518	0.0650119
fgd3	-0.169884	0.0906433	0.0612299	894	-0.000380435	0.015474	0.980386	38726	-1.84334	0.0652792
ddt	0.0984651	0.0503251	0.0507086	897	0.00453697	0.00811049	0.575896	38800	1.84265	0.0653801
cd101	-0.0910537	0.0516101	0.078032	893	0.00502303	0.00838591	0.549187	38629	-1.83749	0.0661379
klk13	0.0858316	0.0561593	0.126733	1026	-0.018449	0.00859505	0.0318411	44105	1.8355	0.0664317
serpina3	0.0303945	0.0191544	0.112911	892	-0.00510438	0.00285612	0.0739172	38720	1.83304	0.066797
cmip	-0.191423	0.0959429	0.0463285	893	-0.0131701	0.0159104	0.407806	38610	-1.83288	0.0668208
axin1	-0.210377	0.111155	0.0586811	1050	-0.00395328	0.0186389	0.832032	45034	-1.83151	0.0670245
sla2	-0.232758	0.121663	0.0560523	894	-0.00695231	0.0199838	0.72792	38726	-1.83145	0.0670341
tfpi2	-0.0858154	0.0435853	0.0492275	1050	-0.00526283	0.00741764	0.478017	45108	-1.82196	0.0684604
sord	0.162682	0.0811959	0.045372	1055	0.0128121	0.0133077	0.335673	45269	1.82148	0.0685336
irak4	-0.23641	0.123546	0.0559525	1050	-0.00845262	0.0200203	0.672879	45034	-1.82136	0.0685521
fes	-0.103887	0.0564802	0.0661538	1028	0.000102924	0.00913168	0.991007	44017	-1.81757	0.0691304
ssbp1	-0.0764364	0.0413357	0.0647798	859	-0.00033077	0.00679957	0.961202	37668	-1.81674	0.0692563
cd7	0.108677	0.0556811	0.0512914	858	0.00665165	0.00832722	0.424421	37595	1.81217	0.0699606
dlg4	-0.165244	0.0809418	0.041494	895	-0.0166019	0.0137763	0.228168	38704	-1.81037	0.0702381
pdlim7	-0.271954	0.145443	0.0617862	1053	-0.00496825	0.024494	0.839264	45311	-1.81018	0.070268
erp29	-0.271957	0.138001	0.049074	880	-0.0188906	0.0228324	0.408037	37950	-1.80921	0.0704186
ica1	-0.167475	0.0875427	0.0560145	1042	-0.00669262	0.0153718	0.663286	44249	-1.80894	0.0704598
dok2	-0.272723	0.142738	0.0563214	1052	-0.01128	0.0235852	0.632462	45128	-1.80713	0.0707422
ppib	-0.196205	0.111568	0.0789353	1054	0.00780011	0.0182819	0.669631	45163	-1.80446	0.0711595
paep	0.223665	0.128876	0.0829482	1041	-0.012936	0.0252897	0.608994	44759	1.80153	0.0716201
itgb5	-0.0721459	0.0455679	0.113664	1052	0.0108774	0.00719104	0.13038	45247	-1.7997	0.0719083
pdlim5	-0.278022	0.134523	0.03905	894	-0.0325876	0.0227976	0.152889	38726	-1.79882	0.0720467
tnfaip8l2	-0.118217	0.0677908	0.0815359	880	0.00569888	0.0122559	0.641942	37950	-1.79876	0.0720569
kifbp	-0.190832	0.101507	0.0603884	1043	-0.00628495	0.0158782	0.692238	44888	-1.79624	0.0724569
fcrl3	0.114512	0.0646717	0.0769104	1042	-0.00313964	0.0104001	0.762742	44249	1.79613	0.0724732
mamdc4	-0.123636	0.06611	0.0617911	893	-0.003374	0.0107144	0.752837	38610	-1.79569	0.0725441
cert	-0.11173	0.0683187	0.102267	1025	0.0125949	0.0117921	0.285492	44031	-1.79327	0.07293
cd1c	-0.0598676	0.0322335	0.0635475	1052	-0.00149011	0.00462393	0.747258	45247	-1.79273	0.0730159
blvrb	0.15385	0.0817942	0.0602584	1047	0.00549891	0.0128994	0.669897	45114	1.79157	0.0732016
lelp1	0.13584	0.0809646	0.0937541	867	-0.011339	0.0140088	0.418279	37546	1.79121	0.0732601
tbl1x	-0.169702	0.0988831	0.086431	1028	0.00968165	0.016392	0.55477	44017	-1.78967	0.0735069
ehd3	-0.246036	0.136823	0.0724876	880	0.00205374	0.0223617	0.926824	37767	-1.78948	0.0735371
tacc3	-0.245312	0.135934	0.0714202	1043	0.000951616	0.022432	0.966162	44888	-1.78747	0.0738617
map2k6	-0.216389	0.117552	0.0659359	1050	-0.00353312	0.019296	0.854719	45034	-1.78682	0.0739666
ophn1	-0.238593	0.125045	0.0567044	895	-0.0124465	0.0209605	0.552643	38704	-1.78364	0.0744816
apob	-0.0444228	0.0256079	0.0831336	900	0.00189124	0.00432216	0.661702	38840	-1.78336	0.0745283
akt2	-0.281855	0.147893	0.0569977	894	-0.0146809	0.024179	0.543737	38726	-1.78287	0.0746076
il3	0.112527	0.064831	0.0829773	862	-0.0048943	0.0116045	0.673203	37377	1.78285	0.0746104
pmm2	-0.133274	0.0700584	0.0574619	865	-0.00682959	0.0115833	0.555459	37510	-1.78067	0.0749664
fn1	-0.0676014	0.0322664	0.0364435	898	-0.00949368	0.00521882	0.0689001	38862	-1.77777	0.0754422
bhmt2	-0.0495203	0.0308133	0.108398	865	0.00593373	0.00495323	0.230943	37510	-1.77687	0.0755899
lsp1	0.0921316	0.0472978	0.0516938	1050	0.00690507	0.00797754	0.386734	45034	1.77682	0.0755983
tubb3	-0.0702223	0.0363121	0.0534579	867	-0.00502119	0.00538939	0.351508	37546	-1.77612	0.0757129
trdmt1	-0.180976	0.099941	0.070508	884	-0.00138914	0.0162836	0.932016	38105	-1.77355	0.0761382
cpvl	-0.0832856	0.0493974	0.0920861	1058	0.00492342	0.00786423	0.531284	45403	-1.76349	0.0778176
il13ra2	-0.0606934	0.0334498	0.0699544	867	-0.00102192	0.0054918	0.852382	37546	-1.76034	0.0783499
msln	0.132013	0.0768778	0.0862455	1041	-0.00472862	0.0115914	0.683319	44823	1.75881	0.0786104
trim58	-0.185217	0.0972978	0.0572837	893	-0.011867	0.0166779	0.476752	38610	-1.75604	0.0790823
cela2a	-0.114849	0.0786333	0.144488	897	0.0245987	0.0115727	0.0335439	38800	-1.75449	0.0793463
lat	-0.150657	0.0917463	0.100866	1060	0.0119755	0.0145638	0.410925	45599	-1.75071	0.0799954
naa10	-0.108272	0.0584052	0.0641094	865	-0.00484793	0.00976215	0.619471	37510	-1.74657	0.080712
prkg1	-0.281523	0.146294	0.0546324	880	-0.0226505	0.0243641	0.352549	37950	-1.7455	0.0808982
c1galt1c1	-0.051033	0.0351629	0.147053	865	0.0111696	0.00616536	0.0700443	37510	-1.7424	0.081438
cdc37	-0.177491	0.0991022	0.0735842	1052	-0.0030651	0.0161067	0.849075	45247	-1.73726	0.0823408
ca13	-0.223447	0.125311	0.074855	1042	-0.00315374	0.0200087	0.874758	44623	-1.73599	0.082566
otud7b	-0.124433	0.0693859	0.0732575	894	-0.00216291	0.012239	0.859727	38726	-1.73538	0.082673
ahnak	0.0805814	0.0404555	0.0466979	880	0.00957099	0.00636851	0.132883	37767	1.73392	0.0829328
rab3gap1	-0.138858	0.0737804	0.0601667	867	-0.00967617	0.0110143	0.379674	37546	-1.73171	0.083326
agr2	-0.17657	0.120042	0.14163	1015	0.0338489	0.0193267	0.0798829	43675	-1.73059	0.0835254
ppp1r9b	-0.200205	0.111195	0.0720686	1060	-0.00579725	0.0184777	0.753718	45599	-1.7247	0.0845807
ment	-0.0508299	0.0294819	0.0850416	880	0.000519476	0.00435985	0.905157	37950	-1.72299	0.0848904
slc9a3r1	-0.179963	0.0981566	0.0670787	880	-0.00889101	0.0163564	0.586733	37950	-1.71914	0.0855885
f12	0.0768186	0.0470806	0.103108	898	-0.00517919	0.00787256	0.51062	38862	1.7178	0.0858335
cntn1	-0.0630983	0.0352261	0.0735406	1064	-0.00208093	0.00522575	0.690479	45660	-1.71341	0.0866366
snap23	-0.189461	0.104117	0.0690907	1052	-0.00950398	0.0167267	0.569908	45128	-1.70653	0.087909
ass1	0.203189	0.0984509	0.0393303	865	0.0334238	0.0151481	0.0273577	37510	1.70431	0.0883234
mepe	-0.0567144	0.0317392	0.0742452	1051	-0.00202786	0.00478385	0.671643	45085	-1.70375	0.0884274
tmed1	0.0839724	0.0658103	0.202301	884	-0.0295458	0.0104383	0.00464949	38105	1.70363	0.0884496
cthrc1	0.0794957	0.0415407	0.0559807	897	0.00810982	0.00551216	0.141229	38800	1.70352	0.0884702
cntn2	-0.0914147	0.0528397	0.0839158	1060	-0.000284647	0.00856609	0.973492	45479	-1.70243	0.0886755
s100a16	0.137919	0.0743364	0.0638361	1024	0.00992564	0.0118236	0.401205	43958	1.70044	0.0890476
wasf1	-0.187211	0.106544	0.0791943	1030	-0.00346886	0.0181982	0.848828	44275	-1.69995	0.0891399
adgrb3	-0.0763943	0.0429551	0.07562	1040	-0.00259312	0.00639984	0.685343	44682	-1.69935	0.0892541
yju2	-0.0581248	0.0359813	0.106576	893	0.00390436	0.00626316	0.533035	38610	-1.69839	0.0894343
stxbp3	-0.0773683	0.0491463	0.11574	1028	0.00729504	0.00838959	0.38456	44017	-1.69812	0.0894858
ahsa1	-0.142825	0.0732965	0.0516596	893	-0.0166554	0.0127794	0.192479	38610	-1.69577	0.0899295
cetn2	-0.135107	0.077231	0.0805254	1025	-0.00248997	0.0130381	0.848545	44031	-1.69318	0.0904203
mydgf	-0.199166	0.112286	0.0764468	900	-0.00626476	0.0192778	0.745203	38800	-1.69317	0.0904229
polr2a	-0.0574008	0.035048	0.101836	859	0.00269849	0.00562738	0.631566	37668	-1.69309	0.0904387
dcun1d2	-0.149708	0.0903342	0.0978302	862	0.00543509	0.0154124	0.724358	37377	-1.69298	0.0904601
gchfr	0.112215	0.0585494	0.0556248	857	0.0118328	0.00999769	0.236599	37029	1.69003	0.0910231
manf	-0.258397	0.146771	0.0786066	1053	-0.00733862	0.0229917	0.749587	45311	-1.68994	0.0910398
ccl14	0.0929885	0.0525612	0.0771615	1048	0.00325294	0.00763394	0.670026	44994	1.68953	0.0911175
crhr1	-0.135641	0.0733636	0.0647616	1030	-0.0102817	0.0117822	0.38286	44275	-1.68712	0.0915797
gcc1	-0.240799	0.127608	0.0594833	895	-0.0226967	0.0208021	0.275246	38704	-1.68689	0.0916249
endou	-0.109119	0.0680463	0.109189	824	0.00691661	0.0101892	0.497257	35809	-1.68644	0.0917114
ifi30	0.0831377	0.0513246	0.10563	872	-0.00438693	0.00789516	0.578455	37688	1.68549	0.091894
cradd	-0.144954	0.0865965	0.0944521	1038	0.00300473	0.0145463	0.836351	44691	-1.685	0.0919894
ccl3	0.118899	0.0769947	0.122831	1050	-0.0116668	0.0103237	0.258441	45034	1.68073	0.0928145
fkbp5	-0.184695	0.109679	0.0924914	1041	0.00193733	0.0181662	0.915071	44759	-1.67875	0.0932011
efcab2	-0.0713324	0.0402388	0.0766204	884	-0.00284657	0.00672538	0.67211	38105	-1.6787	0.0932108
rab33a	-0.133475	0.0736334	0.0702271	865	-0.00811406	0.012807	0.52637	37510	-1.67732	0.0934799
sv2a	-0.134055	0.0749188	0.0739117	867	-0.00685347	0.0119196	0.565313	37741	-1.67677	0.0935879
vav3	-0.208435	0.113057	0.0655799	867	-0.0164776	0.0191613	0.389827	37546	-1.67401	0.0941281
cebpb	0.0742119	0.0442303	0.0936806	1030	-0.000786569	0.00742784	0.915666	44275	1.67222	0.0944808
btd	-0.0439793	0.0234784	0.0613695	898	-0.00415633	0.00401948	0.301121	38862	-1.67183	0.0945573
ehbp1	-0.153127	0.0844059	0.0699866	900	-0.0100683	0.0145068	0.487659	38800	-1.67039	0.0948418
amy1a_amy1b_amy1c	-0.11896	0.0634489	0.0611565	841	-0.0117614	0.0096725	0.224007	36352	-1.67022	0.094875
ythdf3	-0.194586	0.105119	0.0644399	1042	-0.0169794	0.0162835	0.297077	44249	-1.66966	0.0949871
mars1	-0.170898	0.094271	0.0702001	880	-0.0111461	0.0165532	0.500729	37879	-1.66906	0.0951048
rab11fip3	-0.227229	0.124973	0.0693636	900	-0.0158793	0.0208274	0.445811	38800	-1.66816	0.0952843
gzma	-0.0816466	0.0431254	0.0585998	1060	-0.00887729	0.00669691	0.184985	45599	-1.6674	0.0954341
ceacam6	0.0827503	0.0524205	0.114785	897	-0.00542195	0.00803308	0.49971	38800	1.66261	0.0963904
nfatc1	-0.195623	0.111206	0.0788507	1050	-0.00809949	0.0189944	0.669808	45034	-1.66221	0.096471
apoc1	-0.0760922	0.0475445	0.109854	897	0.00378012	0.00702289	0.590403	38788	-1.66192	0.0965293
lpp	-0.13188	0.0735057	0.0731419	865	-0.00801314	0.0127778	0.530587	37510	-1.66023	0.0968684
mcts1	0.0549524	0.0334819	0.101098	893	-0.00122083	0.00498873	0.806676	38629	1.6594	0.097035
klk7	-0.0796654	0.0477093	0.095326	853	0.000428586	0.00740291	0.953833	36985	-1.65894	0.0971276
mapkapk2	-0.142647	0.0834447	0.0877156	884	-0.00229088	0.0140774	0.870728	38105	-1.65859	0.0971992
gdf2	-0.0728799	0.0454197	0.108886	1052	0.00330389	0.00689164	0.631653	45128	-1.65835	0.0972472
cxadr	0.10629	0.0632194	0.0930051	1050	0.000204335	0.00979315	0.983353	45034	1.65828	0.0972607
enpep	0.0806937	0.0529008	0.127532	865	-0.00803299	0.00848328	0.343686	37510	1.65607	0.0977075
oscar	0.0610411	0.0437691	0.163428	1052	-0.0121508	0.00649281	0.0612921	45160	1.65412	0.0981022
smoc1	-0.0699114	0.043027	0.104498	1060	0.00204303	0.00644255	0.751158	45479	-1.65387	0.0981534
serpinb6	-0.119783	0.0683204	0.0798501	1057	-0.00529206	0.0114035	0.642598	45349	-1.65293	0.0983461
cd5l	0.0784716	0.0590079	0.183911	890	-0.0200871	0.00893943	0.0246439	38650	1.65142	0.0986527
hbegf	0.161861	0.0892511	0.0700335	1055	0.0127199	0.0140078	0.363854	45346	1.65082	0.0987759
il22ra1	0.075479	0.0478341	0.114886	1042	-0.00464663	0.00827592	0.574484	44249	1.65055	0.0988302
serpini2	-0.0961314	0.0662191	0.146933	893	0.0143764	0.0105593	0.173368	38629	-1.648	0.0993528
vta1	-0.131899	0.0838371	0.115955	1060	0.00802348	0.0136579	0.556898	45500	-1.64726	0.0995042
cetn3	-0.158709	0.0897814	0.0774491	893	-0.00887538	0.0148504	0.550075	38629	-1.6465	0.0996598
caly	-0.0798323	0.0495354	0.107411	865	0.00255443	0.00717318	0.721761	37510	-1.64602	0.0997596
htr1b	-0.0769125	0.0482782	0.111502	867	0.00367301	0.00833125	0.659309	37546	-1.64488	0.0999949
fcgr3b	0.102184	0.057111	0.0738696	1049	0.00717357	0.00940959	0.445844	45161	1.64148	0.100698
tnfrsf1b	0.0908011	0.0571076	0.112138	1047	-0.00365071	0.00707406	0.605808	45114	1.64138	0.100718
eps8l2	0.0723299	0.0388713	0.0630577	1058	0.00781795	0.00590238	0.18533	45406	1.64082	0.100835
pnma1	-0.114199	0.0621231	0.0663618	880	-0.0108214	0.0108408	0.318184	37767	-1.6393	0.10115
tgfa	0.093282	0.0615436	0.129896	1050	-0.00860954	0.00911419	0.344852	45034	1.63774	0.101476
acadsb	-0.172639	0.103575	0.0959049	900	-0.000792538	0.0169284	0.962659	38800	-1.63742	0.101543
mln	0.159493	0.0994592	0.109104	1050	-0.00574316	0.0170997	0.736975	45034	1.63732	0.101563
acox1	0.103315	0.0632066	0.102442	1052	-0.00126551	0.00945785	0.893557	45128	1.63637	0.101763
mertk	0.0556963	0.0319873	0.0819401	1060	0.0027655	0.00484038	0.567773	45599	1.63612	0.101815
thbs4	0.101543	0.0612654	0.0977336	1050	0.000246354	0.00898029	0.978115	45141	1.63592	0.101856
pcbp2	-0.144055	0.0837317	0.0857004	894	-0.00527926	0.0138302	0.702671	38726	-1.63523	0.102
pdxdc1	-0.0917987	0.0628324	0.14438	862	0.0123713	0.0108033	0.252157	37377	-1.63393	0.102274
was	-0.138104	0.0732439	0.0596369	1042	-0.0166686	0.0128839	0.195757	44249	-1.63289	0.102492
wwp2	-0.0943745	0.0612615	0.123739	1041	0.00709155	0.0104941	0.499192	44759	-1.6325	0.102574
rras	-0.244183	0.143929	0.0901437	867	-0.00588537	0.0250352	0.814145	37741	-1.63116	0.102856
ggt1	0.112721	0.0687237	0.101265	1046	-0.000500925	0.00992878	0.959763	45037	1.63056	0.102982
xiap	-0.10261	0.0626267	0.1017	859	0.00104201	0.011237	0.926118	37668	-1.62906	0.103301
birc2	-0.111444	0.0703077	0.113254	1028	0.00474559	0.0122208	0.697781	44017	-1.62818	0.103487
cplx2	-0.066219	0.0389587	0.0895462	862	-0.00207408	0.0060044	0.729776	37377	-1.62727	0.10368
tctn3	0.0625697	0.0366931	0.0885013	900	0.00214287	0.00582327	0.712888	38800	1.62646	0.103852
tia1	-0.246892	0.141162	0.0805936	1024	-0.014253	0.0233884	0.542258	43772	-1.62586	0.10398
tjap1	-0.155003	0.0953885	0.104472	1052	0.00229562	0.01617	0.887106	45247	-1.62583	0.103985
bhlhe40	0.127826	0.081025	0.115023	867	-0.00563179	0.0135359	0.677366	37546	1.6246	0.104248
lap3	0.0829587	0.0538011	0.12339	1042	-0.00570573	0.00928931	0.539069	44249	1.62397	0.104381
pon1	-0.0591872	0.0340709	0.0826994	900	-0.00333907	0.00498932	0.503344	38840	-1.62188	0.104829
smad2	-0.143087	0.0768659	0.0630016	893	-0.0168301	0.0133513	0.207473	38610	-1.61833	0.105591
zfyve19	-0.168549	0.102971	0.102013	893	0.000138916	0.0172619	0.993579	38629	-1.61567	0.106166
cpb1	-0.127092	0.0772632	0.100282	1064	-0.0012386	0.0110809	0.911	45660	-1.6124	0.106876
fkbp14	-0.199343	0.114925	0.0831683	894	-0.0116675	0.0190361	0.539938	38726	-1.61107	0.107165
nexn	-0.133418	0.0775888	0.0858598	900	-0.00668356	0.0132918	0.615084	38840	-1.60996	0.107407
siae	-0.0795936	0.0540547	0.141196	1052	0.00859413	0.00895874	0.337412	45165	-1.6095	0.107507
rilpl2	-0.197383	0.114044	0.0838397	900	-0.011407	0.0188682	0.545475	38800	-1.60886	0.107646
rgcc	-0.152663	0.0877561	0.0822705	894	-0.00954839	0.0146058	0.513284	38726	-1.60869	0.107684
nt5e	0.120959	0.0744772	0.104653	1052	0.000136692	0.0107524	0.989857	45247	1.60563	0.108355
edar	-0.149999	0.10091	0.137459	1050	0.0144695	0.017614	0.411381	45034	-1.60558	0.108367
timm10	-0.0825943	0.0467387	0.0775436	900	-0.00658951	0.00768417	0.39115	38800	-1.60462	0.108577
pcdh17	-0.0775845	0.0467427	0.0972499	1052	-0.00179804	0.0068625	0.793315	45128	-1.60416	0.108679
amy2b	-0.105018	0.0620823	0.0910426	978	-0.00428112	0.0095268	0.653162	42085	-1.60387	0.108743
cd164l2	-0.0715809	0.0425004	0.0924969	867	-0.00250543	0.00697169	0.719319	37741	-1.60386	0.108746
npy	-0.132235	0.0783535	0.0917695	1060	-0.0050134	0.0126705	0.692347	45479	-1.60287	0.108964
frzb	-0.053311	0.0303435	0.0792271	1040	-0.00413705	0.00490013	0.398521	44605	-1.59985	0.109631
nars1	-0.102575	0.0573816	0.0741817	894	-0.00966389	0.00902204	0.284112	38726	-1.59953	0.109702
gsta3	0.150387	0.0924772	0.104214	1028	0.000545028	0.0155122	0.971972	44017	1.59799	0.110046
adgrg1	-0.194263	0.122145	0.112043	1043	0.00188686	0.0135489	0.889243	44888	-1.59609	0.11047
samd9l	-0.129409	0.0795019	0.103881	1050	-0.000868058	0.0141135	0.950957	45034	-1.59193	0.1114
shd	0.159382	0.0967559	0.0998699	864	0.00334164	0.0164669	0.83919	37436	1.58986	0.111865
calcoco1	-0.181484	0.119004	0.127556	1055	0.0104401	0.0203163	0.607339	45334	-1.58975	0.111892
gapdh	-0.0589768	0.0398622	0.139373	853	0.00515108	0.0063899	0.420174	37128	-1.58846	0.112182
clul1	-0.0908773	0.0529088	0.086162	1050	-0.00584088	0.00873632	0.50377	45054	-1.58575	0.112795
mrps16	-0.0434497	0.0295974	0.142466	859	0.0043517	0.00572035	0.446817	37668	-1.58571	0.112805
vsig10	-0.0606572	0.0398719	0.128541	893	0.00343383	0.00669491	0.608023	38610	-1.58523	0.112914
usp28	-0.0620995	0.0456878	0.174423	895	0.0111425	0.00709973	0.116558	38704	-1.58408	0.113175
hadh	-0.140883	0.0840773	0.0941721	865	-0.00623775	0.0127119	0.62364	37510	-1.58345	0.113318
hs1bp3	-0.174785	0.102025	0.0870391	880	-0.0109415	0.0173107	0.527348	37767	-1.58328	0.113358
cdh23	-0.0546949	0.0355977	0.124778	895	0.00223808	0.00509727	0.66061	38704	-1.5832	0.113377
fcamr	0.135772	0.0930674	0.144955	900	-0.0132896	0.01463	0.363683	38800	1.58222	0.113598
dnpep	0.0965688	0.0639989	0.131676	895	-0.00610122	0.0111222	0.583307	38704	1.58056	0.113979
snap29	-0.17656	0.111028	0.112084	1052	0.000961797	0.01747	0.956095	45247	-1.57946	0.11423
tgm2	0.163504	0.091194	0.0732738	1050	0.0176654	0.0145988	0.226265	45061	1.57911	0.114311
commd1	-0.106562	0.066114	0.107367	880	-0.000475507	0.0119361	0.968223	37767	-1.57908	0.114319
nphs1	-0.071433	0.0433657	0.0998798	859	-0.0024024	0.00649932	0.711654	37668	-1.57424	0.115431
dll4	-0.153127	0.094384	0.105082	880	-0.00233928	0.0167002	0.888601	37767	-1.57316	0.115682
b3gat3	-0.0382277	0.0240617	0.112488	865	7.90148e-05	0.00392005	0.983919	37510	-1.5713	0.116112
pcbd1	0.101931	0.0565319	0.0717207	878	0.0118952	0.00946688	0.20894	37876	1.57079	0.116232
rln2	0.0822717	0.0745431	0.270036	878	-0.039431	0.0217222	0.0694953	37883	1.56745	0.117009
msra	-0.135855	0.0844007	0.107778	1052	-0.00187785	0.0139556	0.892961	45247	-1.56613	0.117319
ankmy2	-0.143939	0.0927566	0.121084	859	0.00323249	0.0154572	0.834351	37668	-1.56505	0.11757
arg2	-0.0937157	0.0501399	0.0619403	893	-0.0142457	0.00832119	0.0869075	38610	-1.56358	0.117917
vtcn1	-0.0567716	0.0391178	0.147003	1028	0.00495261	0.00607304	0.414786	44017	-1.55923	0.118942
pinlyp	-0.109575	0.0856995	0.201377	880	0.0255463	0.013091	0.0510113	37950	-1.55861	0.119088
pvalb	-0.225562	0.131742	0.0871671	1051	-0.0175292	0.0215766	0.416556	45275	-1.55832	0.119157
slc13a1	-0.0909442	0.0547159	0.0968426	893	-0.00390863	0.0115811	0.73574	38610	-1.5562	0.11966
spag1	-0.0932232	0.0651683	0.152925	894	0.00964935	0.0111394	0.386368	38726	-1.556	0.119708
fos	-0.0647402	0.0424	0.127158	859	0.00207797	0.00686804	0.762229	37316	-1.55563	0.119797
bnip2	-0.0645041	0.0413187	0.118845	900	0.000542288	0.00653278	0.933844	38800	-1.55495	0.119959
elac1	-0.167616	0.0981459	0.088017	894	-0.012937	0.0163063	0.427565	38726	-1.5547	0.120017
sh2b3	-0.178139	0.116378	0.126154	1028	0.00514646	0.0189209	0.785624	44017	-1.55451	0.120064
rida	0.116169	0.0655029	0.076494	880	0.0131845	0.00996074	0.185629	37950	1.55435	0.120101
arhgap30	-0.0700511	0.0450393	0.120227	884	0.000817695	0.0076011	0.914333	38105	-1.55155	0.120771
rad23b	-0.0823846	0.052717	0.118416	1028	0.000561624	0.00894474	0.949935	44017	-1.55125	0.120841
nlgn2	-0.0790023	0.0529344	0.135946	867	0.00431269	0.00913289	0.636776	37546	-1.55101	0.120899
zbtb17	0.0782203	0.0503049	0.120273	1030	-0.00072542	0.00818774	0.929402	44275	1.54896	0.121391
nampt	0.108016	0.0552708	0.0509368	1028	0.0208954	0.0104751	0.0460742	44017	1.54869	0.121457
odam	-0.103413	0.067101	0.12359	1024	0.0017559	0.0104455	0.866504	43958	-1.54867	0.121462
lypla2	-0.182846	0.119427	0.126131	867	0.00469706	0.0205425	0.819141	37546	-1.54762	0.121713
plxnb3	-0.085144	0.0550748	0.122415	1049	0.00120559	0.00904164	0.893927	44983	-1.54715	0.121827
cxcl14	0.10501	0.0727648	0.149281	1042	-0.00892317	0.0115212	0.438641	44249	1.54651	0.121981
coro1a	-0.13845	0.100742	0.16965	1027	0.0196674	0.0175974	0.263732	44216	-1.54611	0.122077
brap	-0.224748	0.125468	0.0735919	886	-0.0280419	0.0210915	0.18368	38278	-1.54609	0.122084
pappa	0.0874152	0.0551432	0.113217	1042	0.00113664	0.00893922	0.898821	44249	1.54447	0.122476
nos2	-0.0675762	0.0456735	0.13936	865	0.00388409	0.00768509	0.613276	37510	-1.5429	0.122855
calcoco2	-0.142805	0.0846594	0.0919959	880	-0.0102135	0.0149639	0.494898	37767	-1.54226	0.12301
creld2	-0.108097	0.0621951	0.0824987	1053	-0.0109776	0.0100067	0.272638	45235	-1.5417	0.123146
cd82	0.0738563	0.0491635	0.133389	884	-0.0029029	0.00791505	0.713803	38105	1.54146	0.123206
prkag3	-0.0583941	0.0396087	0.140773	867	0.00336371	0.00611951	0.582549	37741	-1.54092	0.123337
hnmt	0.102436	0.0620015	0.0988077	1035	0.00581572	0.00951027	0.540858	44555	1.54034	0.123477
pdcd6	-0.122231	0.0874634	0.162555	1052	0.0139458	0.0134171	0.298622	45128	-1.53896	0.123814
psmg4	0.126624	0.0746194	0.090075	859	0.0106279	0.0111579	0.34085	37668	1.53741	0.124194
farsa	-0.129492	0.0773187	0.0943387	867	-0.00885586	0.0133891	0.508344	37741	-1.53737	0.124203
dctd	-0.181187	0.110705	0.102062	880	-0.00879158	0.0182117	0.629281	37950	-1.53659	0.124394
crkl	-0.196031	0.1251	0.117417	1052	-0.00132643	0.02048	0.94836	45167	-1.53595	0.124551
crybb2	-0.1312	0.0867171	0.130643	895	0.00286369	0.0127005	0.821609	38704	-1.52967	0.126098
ctsb	-0.101899	0.0703308	0.147676	1053	0.00672778	0.0102516	0.511656	45166	-1.52837	0.126421
ccl15	-0.0842236	0.0564975	0.136325	1064	0.00296405	0.00822243	0.718488	45660	-1.52713	0.12673
ca1	0.116445	0.0736774	0.11431	1022	0.00267038	0.0117407	0.820077	44127	1.52499	0.127262
tbc1d23	-0.172361	0.106184	0.104844	1043	-0.00833209	0.0174368	0.632763	44888	-1.52435	0.127422
tmed8	-0.194492	0.120106	0.105731	893	-0.0089985	0.0197587	0.648811	38629	-1.52393	0.127527
dcn	-0.051711	0.0304772	0.0900543	1030	-0.00482445	0.00430578	0.262525	44275	-1.52329	0.127686
ssb	0.109719	0.0692371	0.113348	1025	0.00293391	0.0111164	0.791838	44031	1.52281	0.127807
dars1	-0.133852	0.0849927	0.115595	1038	-0.00268595	0.0140611	0.848511	44691	-1.52256	0.127868
lilrb2	-0.0605297	0.0408627	0.138827	1062	0.00249621	0.00664306	0.707095	45443	-1.52239	0.12791
akr1c4	0.0847942	0.0610959	0.165473	1030	-0.00946933	0.0102286	0.354572	44275	1.5217	0.128085
srpx	-0.0791577	0.0518106	0.126908	900	0.000190276	0.00675958	0.977543	38800	-1.51863	0.128855
nmi	-0.11777	0.0788022	0.135401	889	0.0036714	0.0138194	0.790494	38471	-1.51793	0.129032
mpig6b	-0.143363	0.0938338	0.126855	1053	0.000666394	0.0145576	0.963489	45235	-1.51679	0.129319
ap2b1	-0.0838334	0.0551007	0.128511	867	0.00093608	0.00937212	0.920441	37741	-1.51666	0.129351
arhgef10	-0.164304	0.106503	0.123255	894	-0.00106558	0.0179998	0.952794	38726	-1.51128	0.130716
c1qtnf6	-0.0674446	0.0432151	0.118957	894	-0.00149002	0.00609323	0.806816	38726	-1.51125	0.130726
tada3	-0.0751533	0.0463774	0.105486	893	-0.00417925	0.00756297	0.580545	38610	-1.51041	0.13094
cdkn1a	-0.200851	0.124727	0.107631	1043	-0.0102039	0.0204963	0.618599	44888	-1.50829	0.131481
zcchc8	0.125264	0.0716968	0.0809717	865	0.0160394	0.0115617	0.165361	37510	1.50399	0.132584
slc51b	0.143868	0.0867329	0.0975303	865	0.0116775	0.014505	0.420786	37510	1.50324	0.132778
adamts4	-0.0545718	0.0450406	0.225995	859	0.0137645	0.0068421	0.0442551	37668	-1.50001	0.133612
ranbp2	-0.068676	0.0395107	0.0825389	867	-0.00866475	0.00637279	0.173949	37546	-1.49948	0.133748
ngfr	-0.0507584	0.0317243	0.109955	900	-0.00244044	0.00565591	0.666118	38800	-1.49942	0.133766
pdzk1	0.103271	0.0590999	0.0809269	859	0.0136872	0.00879189	0.119526	37668	1.49931	0.133794
cdk5rap3	-0.0941328	0.0649782	0.147778	894	0.00470379	0.011302	0.677273	38726	-1.49857	0.133984
thtpa	-0.160777	0.100083	0.108533	892	-0.00879078	0.016811	0.601033	38536	-1.49763	0.134231
erbin	-0.183682	0.12173	0.131622	1043	0.000982199	0.0197688	0.960374	44888	-1.49738	0.134295
dmp1	-0.104291	0.0682334	0.126763	880	-0.000607592	0.0118055	0.958954	37767	-1.4973	0.134316
ciapin1	-0.10615	0.0725163	0.143545	1052	0.00388082	0.0121761	0.749937	45247	-1.49638	0.134554
yy1	-0.0428467	0.0331552	0.1966	859	0.00737828	0.00539672	0.171577	37668	-1.49517	0.134871
mvk	-0.137877	0.0952486	0.148047	1042	0.00636533	0.0155473	0.682235	44249	-1.49459	0.135021
naa80	-0.230179	0.141132	0.103267	867	-0.0168416	0.0232251	0.468365	37741	-1.49155	0.135816
p4hb	-0.0701411	0.0474915	0.140001	1042	0.001555	0.00756221	0.837082	44874	-1.49088	0.135993
cd55	0.0507564	0.0355515	0.153694	1008	-0.0027473	0.0049155	0.57623	43539	1.49078	0.136019
akt3	-0.100846	0.0645427	0.118489	1021	-0.00329195	0.0110582	0.765938	43822	-1.48976	0.136288
gpnmb	0.0566173	0.0346292	0.102366	1025	0.00444826	0.00546554	0.415722	43911	1.48808	0.136729
casp9	-0.139793	0.0763929	0.0676094	859	-0.0248273	0.0119675	0.0380342	37668	-1.4868	0.137068
eri1	-0.0574018	0.0369903	0.121068	884	-0.00158565	0.00655198	0.808773	38105	-1.48581	0.137328
pcare	0.168808	0.11117	0.129264	867	0.00224157	0.0163982	0.891272	37546	1.48226	0.138271
mtif3	-0.173408	0.104897	0.0986592	893	-0.0163463	0.0166917	0.327433	38629	-1.47869	0.139224
bank1	-0.207122	0.126664	0.102305	1050	-0.0174625	0.0206444	0.397629	45034	-1.47785	0.139448
nfx1	-0.116048	0.0818012	0.156359	865	0.00630552	0.0132438	0.633997	37510	-1.47652	0.139804
acot13	-0.223389	0.134351	0.0967218	893	-0.0226496	0.02166	0.295712	38629	-1.47509	0.140189
sell	0.0345894	0.0280058	0.217125	898	-0.00720935	0.00440392	0.101633	38862	1.47439	0.140377
ace2	0.110744	0.0712994	0.120679	1030	0.00464693	0.0100811	0.644832	44275	1.47339	0.140646
mcfd2	-0.0845865	0.0513886	0.100062	1047	-0.00788103	0.00845598	0.351338	44912	-1.47285	0.140792
pglyrp2	-0.056952	0.0358702	0.112707	886	-0.00344686	0.00580359	0.552569	38365	-1.47248	0.14089
mtss2	-0.210146	0.116526	0.0716602	893	-0.0365045	0.0190497	0.0553374	38610	-1.47063	0.141391
dbh	-0.173592	0.128761	0.177945	895	0.0180383	0.0205645	0.380407	38769	-1.46964	0.141659
casp7	-0.161587	0.0968401	0.0955498	895	-0.0173404	0.0160553	0.28013	38704	-1.46947	0.141705
max	-0.186554	0.123083	0.129912	1025	-0.00365636	0.0201684	0.856139	44031	-1.46641	0.142536
scly	0.0972408	0.0550372	0.0775491	1055	0.0153773	0.00944551	0.103532	45346	1.46599	0.142651
gbp1	0.0972738	0.0766335	0.204652	895	-0.0163997	0.0126503	0.194851	38628	1.46353	0.143322
bdnf	0.162274	0.102181	0.112616	897	0.0109669	0.0158556	0.489148	38800	1.46327	0.143394
il17a	-0.0854925	0.0568819	0.133148	1042	-0.00141695	0.00819383	0.862709	44172	-1.46297	0.143475
lysmd3	-0.173737	0.1193	0.145672	867	0.00296348	0.0196436	0.880085	37741	-1.46147	0.143887
cdcp1	0.0882038	0.0677665	0.193348	1041	-0.0116936	0.00998825	0.241712	44759	1.45838	0.144735
mfap4	-0.0566295	0.048271	0.241052	880	0.0143248	0.00609083	0.0186845	37950	-1.45835	0.144743
defb103a_defb103b	-0.067315	0.0487148	0.167394	846	0.00453952	0.00789329	0.56522	37388	-1.45602	0.145388
ist1	-0.17394	0.114282	0.128363	885	-0.0053814	0.0189547	0.776482	38359	-1.45506	0.145654
esyt2	-0.148324	0.0952675	0.119845	895	-0.00781833	0.0157882	0.620461	38704	-1.45501	0.145667
bcr	-0.163877	0.106941	0.125727	1050	-0.00626391	0.017716	0.72366	45034	-1.45401	0.145944
fbp1	0.1378	0.0872209	0.114433	1052	0.00930975	0.0143269	0.515819	45128	1.45368	0.146036
stx1b	0.0605507	0.0454342	0.182978	867	-0.00652299	0.00808179	0.419601	37741	1.45347	0.146094
ipcef1	-0.161569	0.103377	0.118378	1040	-0.00933164	0.0173221	0.590087	44682	-1.4524	0.146391
fgf6	-0.0745903	0.0560245	0.183417	859	0.0075526	0.00788429	0.338104	37668	-1.45189	0.146532
tff3	0.0788592	0.0556646	0.156875	1043	-0.00293953	0.00876719	0.737409	45077	1.4516	0.146613
pf4	0.174067	0.118745	0.143033	890	-0.000376498	0.0185466	0.983804	38570	1.45146	0.14665
mprip	-0.0635725	0.0518057	0.220098	891	0.012613	0.00844215	0.135169	38536	-1.45146	0.146652
ppp2r5a	-0.215447	0.137231	0.116781	893	-0.013697	0.0226989	0.546232	38629	-1.45044	0.146935
dcdc2c	0.107767	0.0712617	0.130833	862	0.00304346	0.0120309	0.800293	37377	1.44906	0.147321
atxn3	-0.106847	0.0761342	0.160845	895	0.00476725	0.0121292	0.694293	38704	-1.44776	0.147683
hgfac	-0.0448091	0.0334364	0.18055	886	0.00420363	0.00534238	0.431377	38474	-1.44749	0.147761
wfdc2	0.086739	0.0690573	0.209393	1007	-0.0138753	0.00798597	0.0823126	42803	1.44732	0.147806
ccs	0.0854342	0.055621	0.124842	1041	0.00385214	0.00921244	0.675843	44759	1.44704	0.147887
cd244	-0.0491272	0.034477	0.154475	1060	0.00129261	0.0051978	0.803606	45599	-1.44608	0.148156
anpep	0.0502435	0.0374455	0.179959	1052	-0.00444758	0.00532926	0.40397	45228	1.44598	0.148182
brd3	-0.0815277	0.0549846	0.138511	865	-0.000971876	0.0093138	0.916894	37510	-1.44448	0.148603
map2	-0.0822821	0.0509776	0.106864	895	-0.00756527	0.00884863	0.392576	38704	-1.44408	0.148715
gprc5c	0.104122	0.0693193	0.133436	893	0.0028683	0.0107663	0.789921	38610	1.44338	0.148913
impa1	-0.106531	0.0716667	0.137458	1041	-0.00196278	0.0116988	0.86676	44759	-1.44003	0.14986
serpinb1	-0.140303	0.104022	0.177705	1039	0.0114819	0.0173408	0.507889	44970	-1.43929	0.150068
col18a1	-0.0452479	0.0343697	0.188291	1060	0.00446007	0.00450632	0.322309	45300	-1.434	0.151573
tnfaip8	-0.050306	0.0404116	0.213472	1042	0.00847609	0.00703031	0.227959	44249	-1.43306	0.151841
dab2	-0.197363	0.131018	0.132268	1060	-0.00728135	0.0214118	0.733811	45479	-1.43181	0.152197
csf3	-0.0956142	0.0569385	0.0934041	1042	-0.0129946	0.00943113	0.168259	44249	-1.43153	0.15228
prrt3	0.0746315	0.0560292	0.183203	880	-0.00621738	0.00725761	0.391632	37767	1.43102	0.152424
lats1	-0.154176	0.0957664	0.107785	859	-0.015127	0.0164575	0.358019	37668	-1.43098	0.152435
mthfsd	-0.197735	0.126047	0.117069	884	-0.0147919	0.0217457	0.496367	38105	-1.43026	0.152644
ppp1r2	-0.138314	0.0905681	0.127017	1052	-0.00718918	0.0154144	0.640935	45128	-1.42728	0.153498
gsap	0.144556	0.107944	0.180813	1028	-0.0111177	0.0164798	0.499916	44017	1.42565	0.15397
fcer2	-0.107567	0.0697255	0.123201	1047	-0.00720426	0.00984068	0.464117	45114	-1.42528	0.154076
bloc1s2	-0.142907	0.0815068	0.079903	867	-0.0250299	0.0141648	0.0772279	37546	-1.42487	0.154195
itgb1bp2	-0.205388	0.137014	0.134174	1030	-0.00798728	0.0214484	0.709601	44275	-1.4234	0.15462
hagh	0.139269	0.0891057	0.118363	1055	0.0111799	0.014068	0.426791	45346	1.41991	0.155635
lmnb1	0.113815	0.0753637	0.131346	890	0.00560018	0.0117793	0.634487	38564	1.41868	0.155992
defb118	0.0795666	0.0587615	0.176072	867	-0.00517113	0.0110958	0.641186	37546	1.41702	0.156477
metap1	0.036278	0.0328417	0.26958	1025	-0.0109383	0.0057088	0.0553657	44031	1.41645	0.156643
spart	-0.117818	0.0858043	0.170071	880	0.0055226	0.0150751	0.714113	37950	-1.41578	0.156839
sirt1	0.146323	0.101662	0.150429	859	0.00039579	0.0170956	0.98153	37668	1.41554	0.156909
aspscr1	-0.113456	0.0779922	0.146103	894	-0.0015516	0.0130405	0.90529	38726	-1.41517	0.157019
entpd5	-0.0334701	0.0254319	0.188447	1030	0.00295847	0.00405753	0.465926	44275	-1.4145	0.157214
nudc	-0.106681	0.073906	0.149184	1060	-0.000756037	0.0122089	0.950623	45599	-1.41408	0.157339
dgcr6	0.0674219	0.0505801	0.182893	867	-0.00508982	0.0085113	0.549838	37546	1.41373	0.157443
dnajb6	-0.138403	0.0946127	0.143874	869	-0.00274385	0.0163048	0.86636	37600	-1.41301	0.157652
tdp1	-0.0986567	0.080788	0.222342	893	0.01709	0.0138188	0.216198	38610	-1.41221	0.157888
cxcl6	-0.12389	0.0893157	0.165702	1060	0.00390418	0.0146188	0.78942	45599	-1.41203	0.157941
rtn4ip1	-0.163734	0.106483	0.124489	894	-0.0114025	0.0174872	0.514374	38726	-1.41166	0.15805
mmp13	0.051059	0.0422788	0.227453	1025	-0.00925717	0.0062145	0.136335	44031	1.41146	0.158108
ccl18	0.132042	0.0858532	0.124359	1031	0.00931994	0.013826	0.500258	44498	1.41125	0.15817
asrgl1	-0.147001	0.112087	0.190036	880	0.0134933	0.0196884	0.493132	37767	-1.41028	0.158456
fzd10	-0.0972084	0.0666046	0.144796	867	-0.00192008	0.0114107	0.866371	37741	-1.41011	0.158506
fadd	-0.125971	0.0865888	0.146019	1052	-0.00214658	0.0146971	0.883879	45128	-1.40986	0.15858
fis1	-0.123264	0.0868237	0.155991	1050	0.000743635	0.0148629	0.960096	45097	-1.4078	0.159192
twf2	-0.148903	0.0949184	0.117061	897	-0.013389	0.0161958	0.408413	38800	-1.40735	0.159324
nrgn	-0.171587	0.106247	0.106666	900	-0.0200641	0.0174476	0.250168	38840	-1.40729	0.15934
ywhaq	-0.1222	0.0833919	0.143181	880	-0.00315497	0.0142449	0.824719	37950	-1.40715	0.159383
ddhd2	-0.10823	0.0735297	0.141397	894	-0.00319819	0.0128407	0.80331	38726	-1.40713	0.159389
gsta1	0.158697	0.106337	0.135895	1049	0.00716789	0.0173097	0.678805	45057	1.40648	0.15958
shmt1	-0.136012	0.0950136	0.152586	1053	-0.000514346	0.0166152	0.975304	45235	-1.40477	0.160091
crisp3	0.0452065	0.0327164	0.167389	896	-0.00130443	0.00512349	0.799035	38481	1.40452	0.160163
gpr158	-0.074695	0.0485276	0.124105	894	-0.00589667	0.00676163	0.383171	38726	-1.40415	0.160274
plcb1	-0.0678723	0.0490314	0.16664	859	0.00195088	0.00861386	0.820828	37668	-1.40257	0.160745
glt8d2	0.0625786	0.0534851	0.242266	1025	-0.0134522	0.00898667	0.134425	44031	1.40188	0.160951
wasf3	-0.138368	0.0996226	0.165161	1025	0.00309014	0.0161656	0.848405	44031	-1.4016	0.161034
numb	-0.141159	0.0962299	0.142774	859	-0.00442871	0.0162168	0.784782	37668	-1.40111	0.16118
dda1	-0.055473	0.0451023	0.219057	865	0.00862908	0.00768981	0.261808	37510	-1.40104	0.161201
gstt2b	-0.369017	0.27542	0.180642	895	0.0220099	0.0454594	0.62827	38704	-1.40079	0.161276
cr2	0.0789666	0.0590773	0.181622	1053	-0.00472059	0.00890746	0.596143	45299	1.40074	0.161293
c1ql2	-0.067972	0.0534586	0.203901	859	0.00775829	0.00826862	0.348106	37668	-1.39997	0.161523
med18	-0.118905	0.0882529	0.178174	1028	0.00620908	0.0147242	0.673252	44017	-1.39835	0.162008
edf1	-0.117834	0.0742606	0.112923	894	-0.012396	0.0132951	0.351148	38726	-1.39761	0.16223
sh3bp1	-0.0700237	0.055488	0.207295	893	0.00861204	0.00948525	0.363915	38629	-1.3969	0.162443
bsnd	-0.0698796	0.0477169	0.143434	862	-0.00263792	0.00654632	0.686978	37377	-1.3961	0.162684
ervv_1	-0.0626276	0.0476685	0.189258	865	0.00501924	0.00872924	0.5653	37510	-1.3959	0.162745
psmg3	0.0947613	0.0615466	0.123944	1050	0.00777449	0.0100194	0.437788	45034	1.39499	0.16302
tomm20	-0.146071	0.0924078	0.114296	900	-0.0156401	0.0148471	0.292159	38800	-1.39359	0.163441
ppp3r1	-0.0721483	0.0471584	0.126343	1041	-0.00568979	0.00801095	0.477552	44759	-1.38936	0.164724
txndc9	-0.0927135	0.0595024	0.119554	895	-0.00892739	0.0101403	0.378655	38704	-1.3881	0.165106
kitlg	-0.0764686	0.0501947	0.127951	1052	-0.00609389	0.00718077	0.396086	45128	-1.3879	0.165166
ca5a	0.156548	0.119265	0.18961	1030	-0.0107707	0.0179837	0.549232	44275	1.38723	0.165371
fetub	0.0468863	0.0387378	0.226418	1050	-0.00759614	0.0064724	0.240554	45223	1.38721	0.165377
f7	-0.072724	0.0566463	0.199487	1051	0.00605394	0.00576716	0.29385	45227	-1.38355	0.166497
stambp	-0.10134	0.0738522	0.1703	1038	0.00220818	0.0124106	0.858781	44691	-1.38271	0.166754
dnaja2	-0.12771	0.0952761	0.180398	1058	0.00583594	0.01587	0.713073	45455	-1.38262	0.16678
hgf	-0.0599073	0.0499178	0.230362	1060	0.00981986	0.00726168	0.176291	45599	-1.38229	0.166882
tacstd2	-0.0506293	0.0389593	0.194087	914	0.0038283	0.00597353	0.521606	39958	-1.38166	0.167076
anxa4	-0.110682	0.0799997	0.166799	1049	0.00144737	0.0138702	0.916892	44915	-1.38102	0.167274
gnas	-0.147619	0.0978825	0.131877	894	-0.0105004	0.016692	0.529306	38726	-1.38092	0.167305
fabp1	0.162881	0.126412	0.19786	1051	-0.0134625	0.0187955	0.473833	45085	1.37982	0.167642
cnpy4	-0.125506	0.0872769	0.150729	1043	-0.00348327	0.0144715	0.809789	44888	-1.37928	0.167808
dhps	-0.0483129	0.0427745	0.259001	893	0.0115949	0.00787549	0.140954	38610	-1.3774	0.168389
psmd9	0.106877	0.0683878	0.118402	1043	0.0115172	0.0108373	0.287906	44888	1.37721	0.168446
il20	-0.101487	0.0632298	0.108787	1042	-0.0134335	0.00955959	0.159958	44249	-1.37695	0.168528
krt5	0.0635168	0.0594126	0.285286	1025	-0.0192895	0.00968492	0.0464093	44031	1.37559	0.168947
vps53	-0.12864	0.0899099	0.152797	1043	-0.00330157	0.0149572	0.8253	44888	-1.37515	0.169085
apol1	-0.0825901	0.0608919	0.175333	900	0.00249817	0.0112424	0.824152	38840	-1.37414	0.169398
safb2	-0.0454971	0.0319478	0.154766	894	-0.00105317	0.00532607	0.84325	38726	-1.37221	0.169999
sart1	0.0645034	0.0389039	0.0976786	865	0.0101574	0.00744175	0.172287	37510	1.37205	0.170047
gipc3	-0.178946	0.11655	0.125053	893	-0.017105	0.0188127	0.363235	38629	-1.37085	0.170421
stx3	-0.0710171	0.0445463	0.111239	895	-0.00912343	0.00745596	0.221095	38704	-1.37036	0.170574
ccl11	-0.041973	0.0462256	0.364084	1060	0.022152	0.00732609	0.00249834	45599	-1.37012	0.17065
npl	-0.0894393	0.0631413	0.156979	900	-0.00219518	0.00876747	0.802297	38800	-1.3686	0.171125
tg	0.157436	0.139107	0.258043	893	-0.0349921	0.0211778	0.0984819	38610	1.36755	0.171454
cnst	-0.18056	0.128373	0.159863	1052	-0.00275151	0.0209092	0.895307	45128	-1.36708	0.171599
fcgr2a	0.0877694	0.0671047	0.19118	1045	-0.00529638	0.0114789	0.644512	44918	1.36702	0.17162
itprip	0.0755505	0.0447894	0.0920049	867	0.013126	0.00890024	0.140277	37546	1.36701	0.171624
scarb1	0.11382	0.0676834	0.0929411	1025	0.0201856	0.0108856	0.0636983	44031	1.36587	0.171979
gngt1	-0.0898318	0.0712674	0.207834	867	0.00844179	0.00991854	0.394713	37741	-1.36578	0.172009
ppp1cc	-0.143873	0.093584	0.124558	893	-0.0143038	0.0159598	0.37013	38610	-1.36482	0.172309
clec12a	-0.0351228	0.0273062	0.198702	859	0.00251927	0.00390167	0.518485	37668	-1.36466	0.172361
smpd3	0.101794	0.0677872	0.133552	859	0.00800845	0.0114011	0.482418	37668	1.36437	0.172452
fli1	-0.168356	0.129423	0.193614	1028	0.0105578	0.021251	0.619322	44017	-1.36413	0.172528
f11r	-0.0810675	0.0645018	0.209099	1047	0.00815179	0.0108536	0.452617	45114	-1.36403	0.172558
rnf149	0.0573913	0.0439643	0.192097	880	-0.0030624	0.00598034	0.6086	37767	1.36252	0.173035
usp25	-0.118426	0.0811436	0.144793	893	-0.00625471	0.0140004	0.655057	38610	-1.36225	0.173119
ctag1a_ctag1b	-0.0642711	0.0501047	0.199924	881	0.00512723	0.00952875	0.590525	38041	-1.36068	0.173616
fkbp7	-0.0826735	0.0565373	0.143973	1022	-0.00477537	0.00912452	0.600729	43963	-1.36022	0.173761
zbtb16	-0.107593	0.0832777	0.196655	1028	0.00724746	0.0139725	0.603977	44017	-1.36	0.17383
ctsv	-0.0645034	0.0510363	0.206556	1055	0.00568822	0.00787453	0.470079	45333	-1.35924	0.174069
ccl19	0.149055	0.15019	0.321209	1060	-0.0572484	0.0233612	0.0142664	45500	1.35729	0.174688
pi3	0.0882893	0.075793	0.244337	1044	-0.0154325	0.010501	0.14167	44499	1.35554	0.175246
bst1	0.0657788	0.055712	0.237991	1060	-0.0106611	0.00909128	0.240932	45500	1.35414	0.175691
snx2	-0.140166	0.0972789	0.149974	893	-0.00680928	0.0156109	0.662704	38610	-1.35355	0.175879
prkd2	0.0658309	0.0482209	0.172549	865	-0.000431182	0.008899	0.961356	37510	1.35132	0.176594
srpk2	-0.13758	0.0924802	0.13714	1050	-0.0106761	0.0163422	0.513576	45034	-1.35129	0.176602
lair2	0.127274	0.121493	0.295077	1041	-0.0389127	0.0200973	0.052847	44759	1.34953	0.177168
glrx5	-0.155895	0.0996823	0.118199	880	-0.0195619	0.0170026	0.249937	37950	-1.3482	0.177593
mnat1	0.091489	0.0534442	0.0872749	884	0.0185685	0.00850616	0.0290454	38105	1.34746	0.177831
slk	-0.117884	0.0826883	0.154325	884	-0.00465852	0.0151209	0.75802	38105	-1.34697	0.177989
cd14	0.0636306	0.0515537	0.217391	1023	-0.00656142	0.00787073	0.404484	44230	1.34594	0.178323
gp6	-0.14486	0.104386	0.165515	1046	-0.00260997	0.0168151	0.876652	45040	-1.34539	0.1785
plscr3	-0.0873709	0.0642962	0.174529	893	0.000450751	0.011352	0.968327	38639	-1.34509	0.178597
il2rg	-0.0581659	0.0443418	0.18994	893	0.00223319	0.00712285	0.753883	38610	-1.34488	0.178663
nxph3	-0.052152	0.0396645	0.188921	859	0.00163559	0.00587345	0.780652	37668	-1.34144	0.179779
folh1	0.182747	0.12186	0.134077	859	0.0170358	0.0209483	0.416092	37668	1.34019	0.180185
adcyap1r1	-0.047771	0.0312569	0.126738	1028	-0.00498171	0.0067109	0.457891	44017	-1.33845	0.180749
smtn	-0.146642	0.101955	0.150701	890	-0.00821384	0.0185521	0.657953	38631	-1.33581	0.181613
npr1	-0.0661788	0.0477897	0.166475	865	-0.00151968	0.00793815	0.848182	37510	-1.3347	0.181973
shpk	-0.0503008	0.042535	0.237298	884	0.00730624	0.00789079	0.354494	38105	-1.33162	0.182984
ly96	-0.0779566	0.0463102	0.0926073	1041	-0.0156208	0.00686833	0.022951	44759	-1.33148	0.18303
abl1	-0.101289	0.0754077	0.179495	1043	0.00065161	0.013258	0.960801	44888	-1.33144	0.183045
ca2	0.127505	0.087205	0.144009	1041	0.0101426	0.0135879	0.455404	44970	1.32977	0.183593
tax1bp1	-0.0954564	0.0711642	0.180148	895	0.000568039	0.0123405	0.963286	38704	-1.3295	0.183685
hepacam2	-0.0686034	0.053538	0.200388	895	0.00315364	0.0080399	0.694876	38704	-1.32544	0.185025
jpt2	-0.15036	0.100329	0.134314	893	-0.0156451	0.0167108	0.349162	38629	-1.32449	0.185341
rnf5	-0.119874	0.0845962	0.156836	880	-0.00637362	0.0139723	0.648277	37767	-1.32373	0.185591
ntf3	-0.0621314	0.0500084	0.214361	1050	0.00458918	0.00676112	0.497294	45034	-1.32216	0.186116
notch1	-0.0230467	0.0192677	0.231913	1064	0.00272439	0.00299228	0.36258	45660	-1.32169	0.186273
mzb1	0.076883	0.0705975	0.27639	1052	-0.017344	0.0100664	0.084902	45236	1.32134	0.186387
cdkl5	-0.0973849	0.0645087	0.131502	867	-0.0111344	0.0101446	0.272398	37546	-1.3208	0.186566
arhgap1	-0.0678873	0.0563634	0.228692	1028	0.00742368	0.00886906	0.402579	44017	-1.31993	0.18686
mn1	-0.098512	0.0753925	0.191678	867	0.00198622	0.0111777	0.858963	37741	-1.31859	0.187307
vstm1	0.0770646	0.0605749	0.203585	1025	-0.00366381	0.00952477	0.70049	44031	1.31653	0.187997
snx9	-0.0995083	0.0763402	0.192696	1052	0.0024737	0.0132536	0.85194	45128	-1.3162	0.188107
fabp2	0.127105	0.1017	0.211651	1052	-0.00818724	0.0151416	0.588708	45128	1.3158	0.18824
prkar1a	-0.143501	0.0983253	0.144741	1052	-0.0124745	0.01608	0.437883	45128	-1.31511	0.188472
pga4	-0.155584	0.121878	0.20209	900	0.00562383	0.013442	0.675673	38840	-1.31473	0.188602
anp32c	0.0621578	0.0381892	0.103964	880	0.0108931	0.0079001	0.167946	37767	1.31455	0.188661
plin1	0.0717613	0.0504169	0.154938	1025	0.00486	0.00709271	0.493215	44031	1.31402	0.188839
got1	0.0660107	0.0484673	0.173553	897	0.00147552	0.00799306	0.853543	38800	1.31377	0.188922
traf2	-0.101976	0.0784747	0.194066	1050	0.00266716	0.0138368	0.847149	45034	-1.31321	0.189113
cbs	0.0983327	0.060003	0.101615	880	0.0185672	0.00984991	0.0594354	37767	1.3118	0.189588
cxcl3	-0.179817	0.113577	0.113674	1051	-0.0289975	0.0181287	0.109708	45089	-1.31131	0.189754
rbp2	0.124694	0.100601	0.215443	1043	-0.00838908	0.0148743	0.572757	44888	1.30866	0.190651
hmbs	0.0745564	0.0519203	0.151306	1060	0.00575343	0.00836197	0.491426	45479	1.3083	0.19077
stau1	-0.0958671	0.0718931	0.182733	862	-0.000397476	0.012851	0.975326	37377	-1.30722	0.191138
afap1	-0.124781	0.0900573	0.166229	880	-0.00555343	0.0163031	0.733379	37950	-1.30274	0.192665
siglec10	0.0498412	0.0457335	0.276045	1050	-0.0102975	0.00652908	0.114761	45034	1.30178	0.192991
dbi	-0.114851	0.0875878	0.190059	1042	0.000863358	0.0151784	0.95464	44903	-1.30172	0.193012
spring1	-0.101386	0.0717441	0.157973	862	-0.00677497	0.0116402	0.560547	37377	-1.3017	0.193019
slc12a2	-0.0421681	0.0317324	0.184244	865	-0.000291719	0.00529736	0.956084	37510	-1.30166	0.193032
morn4	-0.119512	0.0851559	0.160847	862	-0.0070102	0.0151564	0.643707	37377	-1.30068	0.193367
cdkn2d	-0.161126	0.116637	0.167442	1043	-0.0076308	0.0179974	0.671571	44888	-1.30062	0.193388
cpa1	-0.106621	0.0789624	0.177215	1064	-0.00285638	0.0113997	0.802151	45660	-1.30062	0.193389
git1	-0.148538	0.110816	0.180471	859	-0.00270184	0.018932	0.886518	37668	-1.29723	0.194553
uso1	-0.143114	0.106354	0.178711	1043	-0.00338157	0.0173836	0.845765	44888	-1.29664	0.194755
triap1	-0.100822	0.0708296	0.154904	1060	-0.00766542	0.0120979	0.526334	45479	-1.29644	0.194823
arid4b	0.0798009	0.0531327	0.133428	1025	0.0101368	0.0081842	0.215509	44031	1.29585	0.195027
mrpl28	-0.0551056	0.050073	0.27141	894	0.0104181	0.00711591	0.143187	38726	-1.29555	0.195132
bgn	-0.203779	0.141491	0.150112	1026	-0.0182319	0.0227857	0.423632	43943	-1.29469	0.195429
il12rb1	-0.061107	0.0472154	0.195879	1042	0.000661932	0.00720379	0.926788	44249	-1.29327	0.195918
gadd45b	0.07249	0.0567141	0.201529	884	-0.00177761	0.00929209	0.848288	38105	1.29228	0.196261
evi5	-0.136431	0.100506	0.174998	859	-0.00470882	0.0174915	0.787772	37668	-1.29119	0.196639
eif4g1	-0.154541	0.115534	0.181308	1060	-0.00340833	0.0192986	0.859815	45599	-1.29024	0.196966
lamtor5	-0.0575036	0.0446567	0.198193	893	0.00098152	0.00791356	0.901292	38610	-1.28957	0.197201
agxt	0.134007	0.0991237	0.176693	1052	0.00482362	0.0148881	0.745946	45128	1.2888	0.197467
nfic	0.0612228	0.0564549	0.278458	894	-0.0122654	0.00822371	0.135846	38726	1.28812	0.197704
ptgds	0.049753	0.0454891	0.274327	1038	-0.0092115	0.00570679	0.106506	44775	1.28615	0.198391
fen1	0.110101	0.0739959	0.137078	1028	0.013553	0.0126776	0.28505	44017	1.28603	0.198433
il31	0.064383	0.0616471	0.296605	859	-0.0160444	0.0108661	0.139803	37668	1.28484	0.198849
myh7b	-0.09161	0.0555659	0.0995814	862	-0.0194019	0.00842221	0.0212475	37377	-1.28483	0.198852
itgb1bp1	-0.0609151	0.0489087	0.213239	1028	0.00266262	0.0078388	0.734105	44017	-1.28354	0.199301
gast	-0.261504	0.19498	0.180203	895	-0.00930364	0.0246497	0.705853	38704	-1.28325	0.199404
tslp	0.0621005	0.066702	0.352066	1030	-0.0247432	0.0115292	0.031867	44275	1.28294	0.199512
cytl1	-0.0507363	0.0364785	0.164616	897	-0.00356969	0.00458317	0.436062	38800	-1.28291	0.199522
ap3s2	-0.0740008	0.0551724	0.180177	895	-0.00234307	0.00917311	0.798394	38704	-1.28121	0.20012
prc1	-0.074275	0.0575627	0.197271	893	0.000150728	0.00860676	0.986028	38610	-1.27874	0.20099
tarbp2	-0.128224	0.0899836	0.154472	1025	-0.0115499	0.0154045	0.453394	44031	-1.27802	0.201242
aif1l	-0.0735818	0.0613246	0.230513	880	0.00599768	0.010827	0.579612	37767	-1.27791	0.20128
ctf1	-0.120791	0.0997595	0.226245	1030	0.00834679	0.0162021	0.606438	44275	-1.27774	0.20134
lilra3	-0.237922	0.15923	0.135476	897	-0.0316517	0.0268017	0.237626	38800	-1.27745	0.201442
rab10	-0.0805088	0.0608964	0.186485	900	-0.00168181	0.0103041	0.870349	38800	-1.2763	0.201849
tnip1	-0.139712	0.10074	0.165832	895	-0.00943281	0.0173141	0.58589	38704	-1.27454	0.202473
atf4	-0.0400305	0.0374305	0.285163	862	0.0083723	0.00647015	0.195677	37377	-1.27424	0.202578
dkk4	-0.0721736	0.0586847	0.219032	1040	0.00333589	0.008852	0.706286	44679	-1.2723	0.203265
rwdd1	-0.090504	0.0737199	0.219843	1060	0.00451277	0.0122379	0.712314	45500	-1.27149	0.203555
spon2	-0.0653848	0.0498355	0.189805	1047	-0.00152456	0.00674363	0.821145	44909	-1.26985	0.204139
hpcal1	-0.111632	0.0856791	0.192892	1060	-0.00136966	0.0141013	0.922624	45599	-1.26983	0.204144
ggt5	-0.0468762	0.0334421	0.161301	1041	-0.0040794	0.00436405	0.34991	44759	-1.26897	0.204452
mdm1	-0.0394887	0.035127	0.261254	867	0.0056436	0.00597337	0.344771	37741	-1.26665	0.20528
rbm25	-0.0560556	0.0525203	0.286131	862	0.0113788	0.00880013	0.196011	37377	-1.26631	0.2054
eef1d	-0.132551	0.103958	0.202623	900	0.00102388	0.0179347	0.954474	38800	-1.26619	0.205444
dapk2	-0.0679059	0.0611262	0.266918	859	0.0106569	0.0108458	0.325821	37668	-1.26549	0.205696
b4gat1	-0.0363778	0.0289468	0.20914	1047	0.000740494	0.00475906	0.876352	45114	-1.26531	0.205761
creg1	-0.0492024	0.0446667	0.270916	1039	0.00802171	0.00749465	0.284479	44540	-1.26347	0.206419
ifit3	-0.0550021	0.0406831	0.176734	884	-0.00279374	0.00728478	0.701349	38105	-1.2632	0.206516
lefty2	-0.0759467	0.062447	0.22419	1057	0.00388855	0.00991479	0.694915	45412	-1.26263	0.206722
insl5	-0.156016	0.121865	0.200795	893	-0.000368935	0.0185762	0.984155	38629	-1.26263	0.206723
nfkb1	-0.1049	0.0816536	0.199246	865	-0.000282399	0.0143732	0.984325	37510	-1.26183	0.207009
tprkb	-0.0851701	0.0690473	0.217726	862	0.00329908	0.012385	0.789951	37377	-1.26116	0.207253
pcyt2	-0.116558	0.0862094	0.17671	893	-0.00632654	0.014583	0.664415	38629	-1.26073	0.207404
cgn	0.0592004	0.0431046	0.169981	867	0.00416382	0.00763535	0.585527	37741	1.25724	0.208666
ca6	-0.0758091	0.0774594	0.327959	1044	0.0226791	0.0122524	0.0641781	44971	-1.25587	0.209164
cxcl10	0.076935	0.0792037	0.331595	1053	-0.0238212	0.012922	0.0652692	45311	1.25552	0.209292
cacna1c	-0.0475077	0.0341453	0.164482	867	-0.00393436	0.00624589	0.528756	37546	-1.25529	0.209375
pyy	-0.171048	0.134429	0.203573	865	-0.000681596	0.0188913	0.971219	37510	-1.255	0.209478
morc3	-0.0403779	0.0315221	0.200548	895	-0.000266978	0.00540665	0.960617	38704	-1.25416	0.209785
leo1	-0.0435104	0.0313828	0.165959	894	-0.00348172	0.00583241	0.550537	38726	-1.25403	0.209832
cryzl1	-0.136492	0.102976	0.185357	880	-0.00552021	0.0177013	0.755154	37767	-1.25349	0.210027
cep20	-0.103216	0.0862366	0.231627	1028	0.00633188	0.0143946	0.660026	44017	-1.25298	0.210213
gm2a	0.0546165	0.0603792	0.36595	873	-0.021546	0.00741433	0.00366308	37857	1.252	0.210571
ryr1	-0.0490181	0.044692	0.273037	865	0.00752095	0.00652288	0.248914	37510	-1.25182	0.210636
gpd1	0.0973747	0.0661471	0.14135	893	0.0134694	0.010931	0.217876	38610	1.25149	0.210755
ikbkg	-0.135145	0.104067	0.194358	1050	-0.00302023	0.0178896	0.865934	45034	-1.25125	0.210842
ldlrap1	-0.158208	0.113882	0.165113	894	-0.0138152	0.0187322	0.460817	38726	-1.2511	0.210898
dpep1	0.0707914	0.0592085	0.232116	1038	-0.00414922	0.00934728	0.65712	44691	1.25022	0.211218
gabra4	0.10119	0.0634161	0.110934	867	0.0204528	0.0123399	0.0974366	37546	1.24969	0.211412
pqbp1	0.079984	0.0621168	0.198163	1028	0.00122762	0.0110384	0.911448	44017	1.24832	0.211915
pak4	-0.0801517	0.070891	0.258476	1025	0.00951747	0.0117616	0.418406	44031	-1.24783	0.212094
serpina12	0.149384	0.115562	0.196415	1017	0.00317105	0.0194656	0.870594	43828	1.24767	0.212153
diablo	-0.177006	0.12852	0.168725	1050	-0.0145354	0.0211186	0.491285	44983	-1.24744	0.212237
snap25	-0.0785622	0.0581058	0.176712	867	-0.00530233	0.00904661	0.557804	37546	-1.24579	0.21284
pnlip	-0.0964806	0.0805696	0.231436	900	0.00483739	0.0117589	0.680795	38840	-1.24434	0.213375
rap1a	0.0884293	0.0792128	0.264586	859	-0.0114815	0.0132022	0.384487	37668	1.24414	0.21345
atp5f1d	0.0866762	0.0747479	0.246541	865	-0.00698233	0.00982741	0.477401	37510	1.2423	0.214125
cd69	-0.1454	0.105031	0.166548	1048	-0.0132731	0.0168088	0.429736	44916	-1.24217	0.214174
cdh5	-0.0449168	0.0367271	0.221607	1064	0.00123853	0.00567739	0.827312	45660	-1.24196	0.214252
apex1	0.0961628	0.0682834	0.159342	1055	0.0102166	0.0114866	0.373772	45339	1.24123	0.214521
plaur	0.0493597	0.0412995	0.232296	1043	-0.00237062	0.00561401	0.672831	44792	1.24115	0.21455
nt5c	-0.0883198	0.0791211	0.26461	900	0.0114528	0.0142452	0.421414	38800	-1.24106	0.214585
angpt1	0.152116	0.103151	0.140598	1048	0.0225724	0.0161083	0.161136	44945	1.24082	0.214671
ahsp	0.12601	0.10066	0.21091	1046	-0.00045358	0.0161452	0.977588	45040	1.24049	0.214795
scgb2a2	-0.0412343	0.0380797	0.279182	865	0.00651405	0.00597942	0.275979	37510	-1.23873	0.215446
oxt	-0.232185	0.178174	0.192813	1060	-0.00908244	0.0286241	0.751017	45500	-1.23631	0.216344
ccl5	0.161009	0.121896	0.186834	1053	0.00837883	0.0195812	0.668725	45299	1.23628	0.216354
reg1a	-0.0749726	0.0681422	0.271485	1039	0.0100369	0.00937545	0.284377	44850	-1.23589	0.2165
cdhr1	0.0587221	0.045654	0.19865	1025	0.0014197	0.00826427	0.863606	44031	1.23507	0.216803
septin9	0.0433425	0.0310387	0.162891	1043	0.00449488	0.00554903	0.417928	44888	1.23205	0.217929
c9	0.0774338	0.0658877	0.240212	900	-0.00458356	0.0100888	0.649601	38840	1.23046	0.218524
muc2	-0.108925	0.102951	0.290331	897	0.0193138	0.0174116	0.267331	38800	-1.22818	0.219378
bche	-0.0410717	0.0338223	0.224947	878	0.00100355	0.00550272	0.85529	38127	-1.22787	0.219498
tigit	-0.0512948	0.0406573	0.207414	884	-0.000689663	0.00691793	0.920589	38105	-1.22704	0.219808
f2r	-0.0844376	0.0662377	0.202675	1053	-0.00206989	0.011008	0.85085	45235	-1.22669	0.219939
rnase4	-0.0522858	0.0381603	0.170997	858	-0.0050079	0.00540527	0.3542	37553	-1.22668	0.219941
thap12	-0.114823	0.0983099	0.243144	859	0.00746556	0.0172036	0.664324	37316	-1.22529	0.220466
eno2	-0.100957	0.0755402	0.181683	1060	-0.00714773	0.0125528	0.569078	45500	-1.22505	0.220556
tnfsf8	0.0509269	0.0458034	0.266499	897	-0.00581241	0.006893	0.399103	38800	1.22496	0.220589
denr	-0.0856258	0.0668915	0.200868	859	-0.00270257	0.0109977	0.805885	37668	-1.22324	0.221237
flt3	-0.0498634	0.042226	0.237929	1028	0.00222421	0.00585916	0.704235	44017	-1.22184	0.221769
tcof1	0.0446627	0.0353401	0.206631	900	0.00088808	0.00616784	0.885513	38800	1.22022	0.22238
sdccag8	-0.179192	0.129597	0.167109	893	-0.0187893	0.0222273	0.397933	38610	-1.21989	0.222506
hexim1	-0.116353	0.092726	0.209828	1050	-0.00159236	0.0158892	0.920173	45034	-1.21986	0.222519
mme	0.143769	0.100824	0.154185	1043	0.0193532	0.0156431	0.216031	44888	1.2194	0.222691
chchd10	0.0714442	0.0596855	0.231621	895	-0.00194757	0.00783804	0.803767	38704	1.21917	0.222778
tst	-0.113583	0.0871179	0.192602	1025	-0.00604015	0.0144208	0.675329	43956	-1.21788	0.223271
dennd2b	-0.0855963	0.0684568	0.211504	865	-0.0014491	0.00952511	0.879081	37510	-1.21747	0.223424
tnfsf12	-0.0412764	0.0349756	0.238207	1060	0.00182371	0.00550535	0.740448	45599	-1.2173	0.223489
stk4	-0.125824	0.0979525	0.199238	1052	-0.0049379	0.0166593	0.766922	45128	-1.21665	0.223736
tdgf1	0.210694	0.178287	0.237571	1025	-0.00872963	0.0278693	0.754104	44031	1.21597	0.223996
dscam	-0.0538439	0.0426652	0.207277	894	-0.00134789	0.00681666	0.843254	38726	-1.21501	0.224364
gtf2ird1	-0.092562	0.0810583	0.253799	884	0.0072433	0.0136736	0.596304	38105	-1.21412	0.2247
ccl25	-0.0682102	0.0609489	0.263337	1060	0.00661138	0.00939841	0.481774	45599	-1.21327	0.225026
bcl7b	0.0723676	0.0531213	0.173446	893	0.00704977	0.00874931	0.420391	38610	1.21325	0.225033
cd207	-0.0604732	0.0519344	0.244529	1022	0.00314897	0.00743648	0.67197	44113	-1.21268	0.225252
afp	-0.0934636	0.0789407	0.236696	1038	0.00345648	0.0129041	0.788808	44614	-1.21168	0.225636
app	0.110516	0.0794209	0.164366	1047	0.0130788	0.0127161	0.303707	45044	1.21141	0.225738
pdcd1lg2	0.0418401	0.0392584	0.286779	1043	-0.00624374	0.00596498	0.295229	44888	1.21091	0.225931
appl2	-0.16819	0.128864	0.192176	880	-0.0100413	0.0216783	0.643226	37950	-1.21025	0.226184
pxn	0.0939062	0.0661873	0.156264	1025	0.0128528	0.0103159	0.212801	44031	1.21	0.226279
gtpbp2	-0.118528	0.0904351	0.190327	867	-0.00754303	0.0155373	0.62734	37741	-1.20951	0.226465
tfap2a	-0.0891854	0.0702658	0.204692	867	-0.00313839	0.0114399	0.783826	37546	-1.20868	0.226787
spock1	-0.0429176	0.0363069	0.237446	1041	0.00134951	0.00489518	0.782793	44759	-1.20831	0.226927
sct	-0.0603966	0.0585921	0.302924	867	0.0111525	0.00887674	0.208989	37741	-1.20736	0.227292
mpi	-0.125096	0.098014	0.202132	1043	-0.00521781	0.0164791	0.751524	44888	-1.20614	0.227762
per3	0.166499	0.146081	0.254701	859	-0.0117975	0.022961	0.607391	37668	1.20573	0.227922
sdk2	-0.061845	0.0502952	0.219163	880	-0.000695237	0.00729731	0.924098	37950	-1.20322	0.228892
scn2b	-0.0472125	0.0358311	0.187975	867	-0.00362595	0.00548396	0.508493	37741	-1.20244	0.229193
krt6c	-0.051167	0.0526582	0.331482	865	0.0127279	0.00750293	0.0898209	37510	-1.20126	0.229652
ttf2	-0.0632372	0.0563477	0.262062	867	0.00531632	0.00943073	0.572946	37741	-1.19993	0.230168
defa1_defa1b	0.0909096	0.0761024	0.232533	1026	-0.00109374	0.0102582	0.91509	44213	1.1981	0.230876
aspn	-0.0355586	0.0344366	0.302079	900	0.00614682	0.00525028	0.241702	38800	-1.19724	0.231211
tpk1	0.0391847	0.034067	0.250358	900	-0.00201053	0.00529077	0.703942	38800	1.19492	0.232119
znrf4	-0.0726143	0.0657723	0.269881	893	0.00691687	0.0103791	0.505146	38610	-1.19441	0.232318
jmjd1c	-0.0910796	0.0677198	0.178998	862	-0.00920843	0.0107769	0.392857	37377	-1.19395	0.232499
swap70	-0.0454353	0.0383882	0.236899	893	0.00109	0.00689054	0.87431	38629	-1.1929	0.232907
gadd45gip1	-0.085426	0.0629856	0.17536	880	-0.00942181	0.0101689	0.354173	37767	-1.19127	0.233549
agrn	0.0520164	0.0508864	0.306919	1053	-0.00908538	0.00668399	0.174066	45311	1.19052	0.233841
clec3b	-0.0337047	0.026784	0.208587	881	-0.00146642	0.00413959	0.723159	37960	-1.18952	0.234237
gamt	-0.0599332	0.036052	0.0967953	865	-0.0162825	0.00702078	0.0203904	37510	-1.18844	0.234658
hspb1	-0.102319	0.0846282	0.226924	1038	-0.000590044	0.0132467	0.964472	44417	-1.18761	0.234988
hdgfl2	-0.0940124	0.0718896	0.191302	895	-0.00741368	0.0124616	0.551898	38704	-1.18691	0.235264
ptrhd1	-0.0782614	0.068143	0.251081	880	0.00368863	0.0115882	0.750252	37950	-1.1856	0.235781
dcxr	0.0957229	0.0632116	0.130245	1052	0.0197649	0.0105491	0.060991	45247	1.18526	0.235917
gh2	0.194336	0.193798	0.316207	1028	-0.0383472	0.0318972	0.229287	44017	1.18471	0.236134
rasa1	0.0452325	0.03946	0.251945	1025	-0.00211081	0.00634199	0.739264	44031	1.18458	0.236184
klrk1	0.0687192	0.0616323	0.265157	895	-0.00500791	0.00883545	0.570855	38704	1.18414	0.236359
cxcl1	-0.144274	0.107322	0.17914	1046	-0.0156531	0.0180224	0.385106	45020	-1.18191	0.237241
foxo1	-0.126657	0.0996876	0.204175	1050	-0.00724113	0.0164589	0.659974	45034	-1.1819	0.237245
adgre5	-0.0514286	0.0397676	0.196215	1062	-0.00393478	0.00585007	0.501203	45443	-1.18157	0.237378
edem2	0.0564432	0.0485472	0.245295	865	-0.00150932	0.00699797	0.829239	37510	1.18152	0.237395
sost	-0.0583201	0.0500834	0.244504	1049	0.00148117	0.00750249	0.843497	45058	-1.18086	0.237659
casp2	-0.0969159	0.0787006	0.218431	1050	-0.00280506	0.013161	0.831223	45034	-1.17943	0.238227
prg2	0.0695199	0.0645474	0.281755	897	-0.00744373	0.00983808	0.44928	38800	1.17874	0.2385
camsap1	-0.143671	0.120305	0.232712	894	0.000116028	0.0208986	0.99557	38726	-1.17755	0.238978
scamp3	-0.124439	0.0989099	0.208638	1043	-0.00644087	0.0165088	0.696428	44888	-1.1767	0.239314
spink8	-0.047448	0.037934	0.211346	865	-0.0020452	0.00708419	0.772813	37510	-1.17655	0.239376
nxpe4	0.0307168	0.0332055	0.355198	865	-0.00904715	0.00659364	0.17004	37510	1.17458	0.240163
phactr2	-0.18874	0.132448	0.154505	894	-0.0312277	0.0219288	0.154441	38726	-1.17327	0.240689
lag3	-0.0792241	0.0520294	0.128143	1043	-0.0175131	0.00777079	0.0242195	44888	-1.17307	0.240768
cga	-0.116531	0.0858818	0.175115	1047	-0.0143309	0.015181	0.345175	45114	-1.17184	0.241261
dusp29	-0.0974355	0.0843835	0.248544	867	0.00251916	0.0126515	0.84217	37741	-1.17144	0.241424
cdk1	-0.0467469	0.0437137	0.285196	862	0.00510073	0.00702201	0.467603	37377	-1.17106	0.241575
il7r	-0.0844698	0.0659007	0.200208	1047	-0.00640219	0.0103363	0.535665	45114	-1.17032	0.241874
batf	0.115114	0.098252	0.241675	867	-0.00140657	0.0162856	0.931173	37741	1.16997	0.242014
pglyrp4	0.0727269	0.0699688	0.298902	865	-0.0102203	0.0118717	0.389305	37510	1.16878	0.242491
fam3d	-0.104603	0.10333	0.311657	893	0.0176107	0.0160939	0.273853	38629	-1.16867	0.242537
micb_mica	0.171381	0.168635	0.30973	1050	-0.0283241	0.0280367	0.312381	45034	1.16821	0.242722
htra2	-0.0797816	0.0700131	0.254745	1052	0.0030921	0.0118073	0.793414	45247	-1.16721	0.243127
chmp1a	-0.107793	0.0912224	0.237616	1041	-7.05326e-05	0.0150658	0.996265	44759	-1.16509	0.243981
rp2	-0.054515	0.0491903	0.268012	1043	0.00353179	0.00812367	0.663743	44888	-1.16428	0.244312
fam172a	-0.0765769	0.0682727	0.262326	880	0.00410522	0.0118981	0.730073	37767	-1.16422	0.244337
thrap3	0.164008	0.126748	0.196022	865	0.0143222	0.0218395	0.511961	37510	1.16382	0.244495
pibf1	-0.111074	0.0894553	0.214686	894	-0.00561625	0.0149618	0.707385	38726	-1.16274	0.244937
bex3	-0.066502	0.0540185	0.218625	862	-0.00285925	0.00898558	0.750332	37377	-1.1622	0.245156
fam13a	-0.087221	0.0724052	0.22867	893	-0.00174329	0.0130483	0.893717	38629	-1.16183	0.245304
myoc	-0.0599222	0.0584685	0.305665	1047	0.008748	0.00870436	0.314895	45114	-1.16168	0.245366
fgf2	-0.102992	0.0781556	0.187866	1050	-0.0110531	0.0130016	0.395254	45034	-1.16041	0.245882
tyro3	-0.0455984	0.0352304	0.19585	1052	-0.00423427	0.00546556	0.438509	45128	-1.16022	0.245957
pgr	0.150688	0.115302	0.191598	859	0.0149444	0.0201672	0.458682	37668	1.15968	0.246177
gigyf2	-0.110538	0.0858787	0.19838	894	-0.00964188	0.0148283	0.515545	38726	-1.15774	0.246971
wnt9a	-0.050323	0.0378255	0.18368	1042	-0.00614722	0.00542941	0.257554	44249	-1.15603	0.247667
slamf8	0.0856876	0.0681997	0.20925	1028	0.00594819	0.0103717	0.566309	44017	1.15591	0.247716
rnase3	0.181279	0.135301	0.180597	1047	0.0230496	0.0217021	0.2882	44912	1.1547	0.248214
tp53	-0.0497001	0.0505867	0.326098	1028	0.00945575	0.00835072	0.257503	44017	-1.15378	0.24859
heph	0.0525954	0.0439735	0.231986	900	0.00161007	0.00505837	0.750261	38800	1.15186	0.249378
pecr	-0.0349579	0.0327934	0.286716	880	0.0033162	0.00551544	0.547672	37767	-1.15096	0.249748
lmod1	0.0630222	0.0495764	0.203984	894	0.0054691	0.00660403	0.407593	38726	1.15073	0.249842
nefl	0.067802	0.0630474	0.282445	1023	-0.0053788	0.00844898	0.524375	43884	1.15044	0.249962
cc2d1a	-0.090153	0.085326	0.290953	1041	0.00941817	0.0145657	0.517894	44759	-1.15031	0.250016
plat	-0.0609248	0.066115	0.357001	1062	0.0160226	0.0103705	0.122347	45513	-1.14978	0.250233
cend1	0.0600546	0.0652929	0.357949	867	-0.0161387	0.0113861	0.156374	37546	1.1496	0.250309
tigar	-0.0701908	0.0562275	0.212195	1022	-0.00471483	0.00912536	0.605387	43963	-1.14944	0.250373
pdap1	-0.147163	0.114321	0.198327	900	-0.0140786	0.0186956	0.45143	38800	-1.14887	0.250608
rab44	-0.0427522	0.0530796	0.420784	893	0.0190426	0.00877192	0.0299476	38610	-1.14861	0.250715
fmr1	-0.0444857	0.0390163	0.254477	1028	0.00098098	0.00677012	0.884792	44017	-1.14817	0.250899
gad1	-0.0350402	0.0311648	0.261179	862	0.00111986	0.00498849	0.822379	37377	-1.1457	0.251919
kazn	-0.152256	0.119313	0.202252	893	-0.0136125	0.0202487	0.501418	38629	-1.14563	0.251947
lrfn2	-0.0656831	0.0456287	0.150368	867	-0.0123963	0.00914308	0.175167	37741	-1.14507	0.252179
ddi2	0.129896	0.0969959	0.180856	880	0.0175307	0.0151409	0.246938	37950	1.14459	0.252377
acy1	0.0959702	0.0730084	0.188963	1052	0.0112394	0.0124964	0.368437	45128	1.14393	0.252655
ceacam8	0.0767472	0.0636695	0.228327	1030	0.00315119	0.00963632	0.743661	44275	1.14289	0.253084
mtr	-0.0902705	0.078063	0.247846	865	-1.91939e-05	0.0125818	0.998783	37510	-1.1414	0.253701
nhlrc3	-0.0409774	0.0410459	0.318404	852	0.00637528	0.00639328	0.318681	37038	-1.13991	0.254325
nop56	0.156537	0.13616	0.250608	865	-0.000545132	0.0212999	0.979582	37510	1.13979	0.254374
nub1	-0.122417	0.0935654	0.19104	1050	-0.014385	0.0161934	0.374368	45034	-1.1377	0.255245
muc16	0.283957	0.228788	0.214836	1043	0.0205402	0.03597	0.567978	44888	1.13739	0.255377
adh4	0.144833	0.102275	0.157046	1030	0.0269536	0.0171697	0.116461	44275	1.13667	0.255678
drg2	-0.0798713	0.0635188	0.208876	1043	-0.00662879	0.0109057	0.543303	44888	-1.13646	0.255766
cdnf	-0.0496297	0.0439032	0.258555	1043	0.000751193	0.00617423	0.903164	44888	-1.13636	0.255805
pfkfb2	-0.0867936	0.0897787	0.333894	1041	0.0166044	0.0148149	0.262383	44813	-1.13633	0.255818
clec4g	0.0379919	0.0409736	0.354021	1050	-0.00906622	0.00646857	0.161047	45034	1.13445	0.256606
ppif	-0.0960979	0.074023	0.194549	897	-0.0111355	0.0119736	0.352376	38800	-1.13306	0.257191
ceacam16	-0.106386	0.0973382	0.274712	893	0.00512563	0.0157191	0.744368	38629	-1.13096	0.258073
artn	-0.0655377	0.0594103	0.270223	1042	0.00233188	0.0084842	0.783433	44249	-1.13091	0.258091
tnn	0.0534663	0.0593672	0.368042	897	-0.0143188	0.00825599	0.0828645	38800	1.13091	0.258093
palm	0.0555185	0.0462742	0.230551	885	0.00279087	0.00598432	0.640958	38424	1.13005	0.258455
dag1	-0.0673676	0.0529027	0.203149	1053	-0.00671804	0.00916938	0.46377	45311	-1.1296	0.258647
ap3b1	-0.118461	0.0883711	0.180426	893	-0.0173349	0.0148194	0.242111	38629	-1.12858	0.259075
trim26	-0.0632654	0.0610882	0.300662	862	0.0067148	0.010983	0.540951	37377	-1.12748	0.259539
nell1	-0.0501958	0.0549509	0.361208	1052	0.0123816	0.00803029	0.123113	45247	-1.12682	0.259819
washc3	-0.0959369	0.0847104	0.257718	895	0.000935562	0.0147531	0.949437	38704	-1.12661	0.259906
fam171b	-0.0387955	0.032604	0.234403	893	-0.00162768	0.00517547	0.753143	38610	-1.12588	0.260215
ak1	0.0983595	0.076551	0.199115	1052	0.0111584	0.0124096	0.368565	45128	1.12444	0.260824
ifngr2	0.0683624	0.0604953	0.258718	1041	-0.000571124	0.00998458	0.954386	44759	1.12428	0.260896
lrg1	0.0307862	0.0329626	0.35057	898	-0.00669471	0.0050281	0.183046	38862	1.12407	0.260983
psca	-0.37238	0.303765	0.220568	893	-0.0264598	0.0493911	0.592156	38629	-1.12401	0.261007
raly	-0.0457781	0.0571517	0.42335	893	0.0193208	0.0095587	0.0432582	38610	-1.12345	0.261247
padi4	0.146361	0.0904437	0.105917	1024	0.0434791	0.0144375	0.00260071	43958	1.1233	0.261308
cacna1h	0.057083	0.0649282	0.379554	865	-0.0168902	0.0110935	0.127883	37510	1.12304	0.261423
psap	0.0406309	0.0401653	0.312011	884	-0.00488962	0.0054708	0.371451	38438	1.12296	0.261454
tpm3	-0.043779	0.0532807	0.411494	865	0.0167406	0.00838842	0.0459763	37510	-1.12204	0.261844
dynlt3	-0.0724452	0.0508611	0.15469	893	-0.0146615	0.00837679	0.0800832	38610	-1.121	0.262286
sprr3	0.0724885	0.0827269	0.381137	895	-0.0213592	0.0129276	0.0984973	38704	1.12083	0.262362
man2b2	-0.0614618	0.0699069	0.379531	900	0.0179349	0.011477	0.118138	38800	-1.12075	0.262396
mmp3	0.0785556	0.0651332	0.228062	1047	0.00484018	0.009233	0.600124	45114	1.12056	0.262475
vsig10l	-0.037918	0.0377298	0.315185	865	0.00485739	0.0063946	0.447494	37510	-1.11779	0.263657
upk3a	-0.0615816	0.0582148	0.290428	867	0.0043186	0.00940778	0.646204	37546	-1.11752	0.263773
lipf	-0.0989305	0.082162	0.22888	880	-0.006265	0.0115322	0.586953	37767	-1.11689	0.264041
cdc42bpb	-0.154441	0.118362	0.192293	893	-0.0203905	0.0199878	0.307667	38629	-1.11674	0.264108
rpa2	-0.0381092	0.0323154	0.238612	859	-0.00140917	0.00600754	0.814546	37668	-1.11655	0.264187
pxdnl	0.0932411	0.0685311	0.173996	893	0.015751	0.0110044	0.152343	38610	1.11643	0.264239
ung	-0.0450012	0.0388672	0.247249	893	-0.00112308	0.00657294	0.864331	38610	-1.11312	0.265657
kirrel2	-0.0527891	0.0503159	0.294356	1025	0.00383524	0.00758994	0.613347	44031	-1.11279	0.2658
nfasc	-0.0424333	0.0408616	0.299292	1060	0.00341777	0.00537631	0.524969	45599	-1.11252	0.265915
acta2	0.0641185	0.0630215	0.3092	1030	-0.00660434	0.00834129	0.428502	44275	1.1125	0.265923
mansc1	0.035331	0.0389622	0.36472	1052	-0.00839087	0.00520828	0.107173	45247	1.11227	0.266023
jam2	-0.0501715	0.0398463	0.208263	1060	-0.00553001	0.00497015	0.265867	45500	-1.11173	0.266255
lta4h	0.0837906	0.071555	0.241865	1060	0.00322549	0.0115448	0.779947	45479	1.11154	0.266334
fgfr4	0.0695083	0.0624919	0.266325	880	-0.000840202	0.0100523	0.933388	37950	1.11143	0.266382
cdh17	-0.112642	0.0856254	0.188624	1052	-0.016433	0.012811	0.199594	45128	-1.11123	0.266469
vps37a	-0.094793	0.0912193	0.298965	1043	0.00799308	0.0154461	0.604824	44888	-1.11099	0.266574
st6gal1	-0.0341977	0.0364903	0.348884	1064	0.00681714	0.00569123	0.230989	45660	-1.11057	0.266755
gne	-0.0823461	0.0775181	0.288358	1028	0.00483745	0.0125861	0.700723	44017	-1.11015	0.266935
krt17	0.0429177	0.0432446	0.321261	865	-0.00574312	0.00743232	0.439692	37510	1.10899	0.267435
krt8	-0.118882	0.0986392	0.22845	867	-0.00849692	0.013642	0.533388	37546	-1.10852	0.267636
arntl	-0.0797275	0.0635662	0.210095	865	-0.00855187	0.010023	0.393539	37510	-1.10604	0.268708
cep43	-0.0874214	0.0786416	0.266555	1020	0.000818438	0.0134317	0.951413	43915	-1.10603	0.268712
gas6	0.0371606	0.0337629	0.271307	1062	-0.000558507	0.00482868	0.907919	45373	1.10592	0.26876
galnt10	-0.0396429	0.0350813	0.258725	1043	-0.000410585	0.00534584	0.938779	44888	-1.10556	0.268915
csnk2a1	-0.0537885	0.0519906	0.301147	894	0.0044645	0.00866939	0.606575	38726	-1.10519	0.269077
vcpkmt	-0.13235	0.113313	0.243131	862	-0.00584082	0.0166045	0.725019	37377	-1.10466	0.269308
rbp1	-0.0826303	0.0834114	0.322142	867	0.0106593	0.013631	0.434225	37741	-1.10379	0.269686
ddx39a	-0.0278397	0.0323519	0.389739	859	0.00819255	0.00436841	0.0607446	37668	-1.10374	0.269704
nrcam	-0.046537	0.0377076	0.217421	1052	-0.00449373	0.00541825	0.4069	45128	-1.10365	0.269746
ppcdc	-0.0556623	0.055121	0.312813	1060	0.0059943	0.00913409	0.511663	45500	-1.10352	0.269801
pnma2	-0.0584501	0.0466059	0.210133	867	-0.00625048	0.00847212	0.460658	37546	-1.10196	0.270478
slc16a1	0.0890505	0.064811	0.169743	1025	0.0167156	0.0111142	0.132591	44031	1.10003	0.271319
vwf	-0.0599242	0.0862619	0.48741	1064	0.036184	0.0140635	0.0100883	45660	-1.09963	0.271495
dipk2b	-0.0330094	0.0342118	0.334886	880	0.00500755	0.00532089	0.346654	37950	-1.09802	0.272196
serpinh1	-0.18046	0.148615	0.224968	884	-0.0151321	0.0248334	0.542298	38105	-1.09724	0.272535
actn4	-0.0377404	0.0363109	0.298876	1042	0.00265745	0.00609972	0.66308	44249	-1.09718	0.272562
scg2	-0.0492474	0.0457957	0.282456	1052	0.00144154	0.00616828	0.815217	45277	-1.09694	0.272666
crh	-0.122982	0.106585	0.248838	1027	-0.00463378	0.0168124	0.782844	43949	-1.0968	0.272729
egf	-0.128228	0.125047	0.305395	1048	0.0105909	0.0198023	0.592769	45015	-1.09647	0.272873
kiaa1549l	-0.0343918	0.0340975	0.313428	884	0.00345573	0.00544303	0.525503	38105	-1.0961	0.273033
ncln	0.085779	0.0691475	0.215063	1042	0.00927327	0.0101521	0.361019	44249	1.09468	0.273657
ikzf2	0.126166	0.113652	0.267214	1028	0.000416796	0.0177411	0.981257	44017	1.0932	0.274306
il34	-0.0677291	0.0442557	0.126227	1024	-0.0187835	0.00693575	0.00676712	43958	-1.09263	0.274554
reg1b	-0.0722179	0.0744933	0.33254	1064	0.00999636	0.0107687	0.353268	45660	-1.09229	0.274705
golga3	-0.0978619	0.089228	0.273042	894	0.000964789	0.0149983	0.948711	38726	-1.09225	0.274722
enpp2	0.0345398	0.0344138	0.315771	1064	-0.00345202	0.00515698	0.503251	45660	1.09178	0.27493
adgrd1	-0.0400188	0.0491301	0.415553	880	0.0142364	0.00752578	0.0585414	37950	-1.09158	0.275016
capg	0.0816204	0.0704689	0.24703	1044	0.00367243	0.0115588	0.750701	44755	1.09155	0.275033
clec1b	-0.117381	0.115617	0.310215	1060	0.0103901	0.0183569	0.571393	45500	-1.09146	0.275073
thop1	0.0463703	0.038097	0.223817	1047	0.0042555	0.00612538	0.487226	44913	1.09144	0.275077
gask1a	-0.048318	0.0521427	0.354369	865	0.00929375	0.0083948	0.268265	37510	-1.09084	0.275344
pecam1	-0.0413366	0.0354912	0.244406	1047	-0.00212094	0.00578839	0.714059	45114	-1.09053	0.275478
ncr3lg1	0.0504713	0.0487489	0.300795	893	-0.00310715	0.00640253	0.627466	38629	1.08971	0.27584
asgr1	-0.0518738	0.0429341	0.227238	1041	-0.00467701	0.00610336	0.443501	44759	-1.08834	0.276443
ceacam18	0.0922981	0.077156	0.23192	884	0.007327	0.0131232	0.576625	38105	1.0857	0.277613
c4bpb	-0.0457377	0.0516652	0.376214	1052	0.0108482	0.00760559	0.153776	45247	-1.08356	0.278558
igf2r	0.0372258	0.0292308	0.20312	1047	0.00518231	0.00455591	0.255338	45114	1.08315	0.278743
casq2	0.0533976	0.0530218	0.314176	865	-0.00490935	0.00930851	0.597916	37510	1.08311	0.278758
hsp90b1	0.0760703	0.0836125	0.363146	1022	-0.0155555	0.0128636	0.226567	43812	1.0831	0.278766
coch	0.0664522	0.0578093	0.250654	900	0.00311233	0.00884372	0.724896	38800	1.08307	0.278778
trim5	-0.115926	0.0995435	0.244458	1050	-0.0066448	0.0166444	0.689733	45034	-1.08279	0.278903
nppb	0.189726	0.193836	0.327912	1030	-0.0218477	0.0250013	0.382197	44275	1.08254	0.279013
scn3a	-0.0259582	0.0463252	0.575389	867	0.0247498	0.00703481	0.000435017	37741	-1.0822	0.279164
col24a1	0.065641	0.0731926	0.370055	893	-0.0142635	0.0104498	0.172276	38629	1.08074	0.279811
dand5	-0.0735675	0.0609197	0.22753	859	-0.00672502	0.0107119	0.530133	37668	-1.08064	0.279855
elob	-0.0497999	0.0428751	0.245757	865	-0.0027939	0.00751041	0.709892	37510	-1.0799	0.280185
azi2	-0.0648278	0.0604122	0.283521	894	0.00141425	0.0108454	0.896249	38726	-1.07925	0.280477
ufd1	-0.203992	0.163135	0.211463	893	-0.0255804	0.0267643	0.339196	38629	-1.07922	0.28049
pdia4	-0.0890651	0.0694193	0.199825	897	-0.0131494	0.0117174	0.261778	38800	-1.07833	0.280887
tlr3	0.0833875	0.0737063	0.258165	1060	0.00290039	0.0118371	0.806438	45599	1.07818	0.280952
atox1	-0.0971829	0.0822486	0.237643	1052	-0.00740014	0.0137484	0.590405	45247	-1.07666	0.281631
fkbpl	-0.0697686	0.0670107	0.298086	893	0.00340027	0.0113512	0.76452	38629	-1.07656	0.281676
atxn2l	-0.0533299	0.054899	0.331604	894	0.00651664	0.00918988	0.478261	38726	-1.07516	0.282303
scpep1	-0.064727	0.0584769	0.26865	878	-0.00107166	0.00971189	0.912137	37630	-1.07385	0.282892
pikfyve	-0.0653857	0.0593739	0.271097	859	-0.00061111	0.0108437	0.955058	37668	-1.07321	0.283177
col3a1	0.0280097	0.0284803	0.325639	897	-0.00292143	0.00444429	0.510963	38800	1.07307	0.28324
syap1	-0.0735524	0.06148	0.231879	880	-0.00652809	0.011045	0.554493	37950	-1.073	0.28327
sugt1	-0.0907974	0.0945581	0.337167	1028	0.0119663	0.0154714	0.439261	44017	-1.07252	0.283487
prdx5	-0.0765485	0.0763616	0.316357	1060	0.0063019	0.0129906	0.6276	45599	-1.06961	0.284796
hnrnpk	-0.0973539	0.0874589	0.265911	1024	-0.00252415	0.0151116	0.867344	44134	-1.06845	0.285319
aida	-0.0891695	0.0954858	0.350642	867	0.0142168	0.0165461	0.390225	37741	-1.06684	0.286044
slamf6	-0.0423126	0.043357	0.329338	1028	0.00454952	0.00724077	0.529798	44017	-1.06608	0.286387
sf3b4	0.0994098	0.0893784	0.266295	1043	0.00330347	0.0142549	0.816739	44888	1.06185	0.288302
mthfd2	-0.0331574	0.0294409	0.260369	895	-0.00149107	0.00502699	0.766764	38704	-1.06024	0.289033
klb	0.0775555	0.0884443	0.380756	1025	-0.0174256	0.0142774	0.22228	44031	1.06018	0.289061
c3	0.0603786	0.0573779	0.292964	853	-0.00118858	0.00908766	0.895942	36849	1.0598	0.289235
fxn	-0.0952869	0.0879322	0.278772	1060	-0.00104801	0.0140003	0.940329	45479	-1.05839	0.289877
znf830	0.106066	0.084381	0.20909	893	0.0153413	0.0153903	0.318859	38610	1.05772	0.290181
prtn3	0.0781751	0.0594264	0.188641	1022	0.0146781	0.00941019	0.118813	44009	1.05535	0.291266
il36g	-0.0719229	0.0838315	0.391165	851	0.017437	0.0128865	0.176024	37518	-1.05357	0.292079
rbks	0.0809263	0.0579908	0.16317	1018	0.0189642	0.00993012	0.0561699	44066	1.05315	0.292271
cep112	-0.0427234	0.0424876	0.314915	865	0.00293807	0.00870034	0.735594	37510	-1.05285	0.292408
edn1	0.0439132	0.0450623	0.330077	880	-0.00382161	0.00566848	0.500198	37767	1.05103	0.293247
uhrf2	-0.04385	0.0395068	0.267338	865	-0.00173781	0.00673553	0.796404	37510	-1.05078	0.293358
lrch4	-0.0882356	0.0813035	0.278109	865	-0.00163909	0.013487	0.903271	37510	-1.05074	0.293376
hip1r	-0.0532929	0.0550537	0.333299	895	0.00524372	0.00859317	0.54172	38625	-1.05054	0.293468
anxa11	-0.0874658	0.0814707	0.283256	1048	-0.000850551	0.0127881	0.946971	44962	-1.05029	0.293586
cd8a	-0.0651361	0.0636147	0.30611	1060	0.00238177	0.00954798	0.803011	45500	-1.0496	0.293902
s100a12	0.104829	0.0901942	0.2454	1031	0.00895839	0.014565	0.538517	44475	1.04934	0.294021
blmh	-0.0356664	0.0377726	0.345261	1064	0.00446131	0.00611652	0.465769	45660	-1.04869	0.29432
psmc3	-0.0427949	0.0396592	0.280862	862	-0.000762801	0.00583198	0.895937	37377	-1.04855	0.294383
cep85	-0.0771298	0.0727801	0.289502	1028	0.000297053	0.0124939	0.981032	44017	-1.04851	0.294404
preb	0.041023	0.0335058	0.221096	1042	0.00540055	0.00563612	0.337965	44249	1.04844	0.294435
meltf	0.0391517	0.0362102	0.279885	900	0.000747147	0.00556939	0.893283	38800	1.04827	0.294513
inhbc	-0.0560022	0.0512568	0.274831	1047	-0.00151535	0.00869466	0.861642	45114	-1.04805	0.294618
slamf7	0.0602438	0.0727175	0.407597	1050	-0.0167803	0.0112475	0.135729	45034	1.04678	0.295203
brd2	-0.0485369	0.0388609	0.212007	867	-0.00729333	0.00663098	0.271388	37546	-1.04619	0.295472
pth1r	-0.049766	0.0405467	0.219959	1050	-0.0066978	0.00725241	0.355738	45034	-1.04559	0.29575
frmd4b	-0.0841599	0.0763469	0.270625	865	-0.0030689	0.0136583	0.82222	37510	-1.04554	0.295774
rbpms2	-0.139353	0.117222	0.234844	880	-0.0151683	0.0199821	0.4478	37767	-1.04433	0.296332
adam22	-0.0586401	0.0490982	0.232618	1041	-0.00690002	0.006755	0.307038	44759	-1.04397	0.296498
pear1	-0.0255615	0.0279093	0.359939	1064	0.00390604	0.00429736	0.363387	45660	-1.04354	0.2967
atrn	-0.0183574	0.0198153	0.354474	898	0.00259574	0.00324446	0.423684	38862	-1.04353	0.296703
ccl4	0.0787359	0.0848496	0.353649	1051	-0.0105884	0.0126656	0.403159	45165	1.0412	0.297782
eppk1	-0.084396	0.0802719	0.293376	880	0.000374383	0.013847	0.97843	37767	-1.04067	0.298028
gys1	-0.116378	0.106547	0.274969	1030	-0.00400407	0.0178405	0.822419	44275	-1.04021	0.298241
gpc5	-0.0795714	0.0680887	0.242816	1041	-0.00791445	0.0106924	0.459187	44759	-1.03966	0.298496
ccne1	0.128557	0.109006	0.238586	859	0.0137103	0.0183518	0.455018	37668	1.03896	0.298825
nudt5	-0.0591493	0.0581861	0.309602	1047	0.00215047	0.0098953	0.827958	45114	-1.0386	0.298991
vsig4	0.0684664	0.065876	0.298898	1042	-0.000469385	0.00812045	0.953906	45052	1.03859	0.298997
aprt	-0.0625419	0.0573067	0.275372	1039	-0.00236224	0.00917958	0.796921	44684	-1.03691	0.299776
rab27b	-0.116886	0.0991002	0.238524	900	-0.0129599	0.0157113	0.409445	38800	-1.03576	0.300315
mgmt	-0.155183	0.143449	0.27959	1050	-0.00473737	0.0233723	0.839377	45034	-1.03513	0.30061
larp1	-0.0793782	0.0698511	0.256099	893	-0.00620349	0.0121907	0.610847	38610	-1.03198	0.30208
bag6	-0.0382592	0.0411182	0.352347	1030	0.00479002	0.00709745	0.499747	44275	-1.03171	0.30221
dtx2	0.0733657	0.0721267	0.309354	867	-0.00204725	0.0122135	0.866882	37741	1.03089	0.302594
siglec9	0.0339966	0.0342456	0.32107	1058	-0.00175403	0.00560297	0.754241	45413	1.03025	0.302893
dnajc21	-0.046377	0.0439087	0.291156	895	-0.00052214	0.00747864	0.944339	38704	-1.0295	0.303246
grpel1	0.0817035	0.0707912	0.248705	1043	0.00785142	0.0116594	0.500697	44888	1.02937	0.303306
adgre1	0.0633307	0.066154	0.338666	893	-0.00553306	0.0104818	0.597592	38629	1.02813	0.303887
map1lc3b2	-0.0768387	0.0846185	0.364101	865	0.0110662	0.0125853	0.379244	37510	-1.02753	0.304169
cd160	-0.0718192	0.0635563	0.258729	1060	-0.00587837	0.00891523	0.509667	45599	-1.02746	0.304204
arl13b	-0.0707987	0.0780757	0.364769	865	0.010512	0.0134605	0.434834	37510	-1.02629	0.304753
pvr	-0.0481518	0.0453323	0.288389	1060	-0.00115991	0.00699516	0.868302	45500	-1.02448	0.305606
nfu1	-0.14534	0.12285	0.237098	893	-0.0179064	0.0195694	0.360187	38629	-1.0244	0.305647
tspan8	0.134137	0.113022	0.235614	893	0.0168173	0.0188624	0.372625	38629	1.02387	0.305898
ccdc28a	-0.0298981	0.0328016	0.362295	867	0.00412671	0.00565476	0.465532	37741	-1.02221	0.30668
glyr1	0.082419	0.0631418	0.192129	893	0.016831	0.0116151	0.147327	38610	1.0216	0.30697
prss2	-0.082071	0.0753381	0.276242	1053	-0.00451983	0.0100285	0.652208	45299	-1.02037	0.307551
ctrc	-0.0765544	0.0811059	0.345448	1050	0.00708814	0.0120727	0.557124	45088	-1.02004	0.307711
hla_dra	0.035916	0.0434278	0.408411	1042	-0.00891648	0.00689178	0.195747	44893	1.01959	0.307925
lifr	0.0324594	0.0313517	0.300753	1050	0.000152853	0.00460083	0.973497	45034	1.01954	0.307948
septin7	0.0623678	0.0624734	0.318404	884	-0.00214933	0.0101366	0.832079	38105	1.01938	0.308021
mecr	-0.134352	0.109717	0.221081	880	-0.0211169	0.0175696	0.22941	37767	-1.01908	0.308164
timp3	0.185424	0.154791	0.231226	1053	0.0256149	0.0252022	0.309456	45311	1.019	0.308201
abraxas2	-0.0801114	0.0765416	0.29556	865	-0.00103972	0.0128013	0.935267	37510	-1.0189	0.308249
tk1	0.0474591	0.0452127	0.294151	884	0.000576501	0.0086412	0.946809	38105	1.0185	0.308441
orm1	0.0175197	0.0246293	0.477064	896	-0.00788445	0.00394171	0.0454792	38719	1.0185	0.308442
il20ra	0.0612539	0.0642263	0.340447	1042	-0.00473416	0.00857044	0.580689	44249	1.0184	0.308486
fabp3	0.0831519	0.0747242	0.2661	900	0.00653066	0.00991918	0.510293	38800	1.01647	0.309405
shisa5	0.0460263	0.0463078	0.320531	897	-0.00130809	0.0049232	0.790472	38800	1.01644	0.30942
comp	0.0447438	0.0423408	0.290872	1033	0.00125167	0.00649176	0.84711	44633	1.01533	0.309949
fgfbp1	-0.0386196	0.0404112	0.339462	1052	0.00287358	0.00623191	0.644724	45247	-1.01478	0.310212
nacc1	-0.0580308	0.0587271	0.323351	893	0.00250254	0.0107851	0.81651	38610	-1.0138	0.310677
nfkb2	-0.0738265	0.0652911	0.258478	884	-0.00672886	0.01084	0.534774	38105	-1.01379	0.310682
dpt	-0.0349547	0.0339649	0.303647	1064	-0.000103596	0.00533398	0.984505	45660	-1.01367	0.31074
heg1	-0.0287643	0.0333826	0.389115	880	0.00548443	0.0053011	0.30087	37950	-1.01325	0.310942
efnb2	0.0754035	0.0811373	0.352977	867	-0.0075231	0.0111781	0.500938	37741	1.01249	0.311304
myh9	-0.148149	0.133743	0.268282	897	-0.0109956	0.0217638	0.613404	38800	-1.01219	0.311447
clec5a	0.0441429	0.0406335	0.277568	1050	0.00262347	0.00567081	0.643634	44983	1.01199	0.311541
eno3	0.0879097	0.0677664	0.194889	880	0.0184947	0.0115635	0.10974	37767	1.00973	0.312623
enoph1	0.0700857	0.0655129	0.285	893	0.00309215	0.0105873	0.770241	38610	1.0095	0.312734
trpv3	-0.060488	0.0541403	0.264201	865	-0.00501336	0.00954342	0.599363	37510	-1.00909	0.312932
reg4	-0.0639785	0.068551	0.350881	1052	0.00582971	0.00935686	0.533261	45160	-1.00898	0.312982
s100a11	0.0650016	0.0547167	0.235118	1042	0.00907038	0.00929798	0.329307	44770	1.00775	0.313574
ofd1	0.0648906	0.0740316	0.380984	884	-0.0107728	0.0126192	0.393286	38105	1.00751	0.313689
tlr2	0.0303194	0.0264179	0.251412	884	0.00334799	0.00443286	0.450094	38105	1.00687	0.313995
asah1	0.0601818	0.0590932	0.308757	886	4.56542e-05	0.00887827	0.995897	38445	1.00635	0.314245
lpa	0.196786	0.217314	0.365431	876	-0.0246027	0.0343244	0.473522	37951	1.00628	0.314283
rnf168	0.0506582	0.0474485	0.285982	859	0.00225451	0.0079301	0.776184	37668	1.00617	0.314332
eddm3b	0.0599303	0.0605897	0.322875	893	-0.00181695	0.00986128	0.853817	38610	1.00587	0.314478
adh1b	0.115746	0.0921866	0.209612	880	0.0219944	0.015063	0.144256	37950	1.00366	0.315542
pigr	0.0582049	0.0505481	0.249806	1027	0.00692258	0.00746662	0.353861	44543	1.00363	0.315555
pdgfa	0.101788	0.0867543	0.240944	1064	0.0136541	0.0137364	0.320225	45660	1.0034	0.315668
tmem25	0.0394666	0.0551602	0.474494	894	-0.0165199	0.00867954	0.0570073	38726	1.00264	0.316033
il36a	-0.0805809	0.0721557	0.264409	859	-0.00744986	0.0108503	0.492337	37668	-1.00225	0.316223
ly9	-0.0478166	0.0381633	0.210507	1040	-0.00918363	0.00559208	0.100544	44584	-1.00161	0.316531
fgfbp2	-0.046391	0.0620765	0.455068	897	0.016418	0.00952604	0.0848091	38800	-1.00009	0.317266
ctnna1	-0.0408008	0.0346827	0.239759	867	-0.00546075	0.00679769	0.421792	37546	-0.999928	0.317345
cbln4	-0.0409108	0.042025	0.330535	1060	0.00154951	0.00611584	0.799991	45479	-0.999825	0.317395
klk14	-0.070592	0.056507	0.211846	1060	-0.0134495	0.00885559	0.128832	45479	-0.999054	0.317768
ptgr1	-0.0969965	0.106123	0.360961	900	0.0100961	0.0158916	0.525232	38800	-0.998011	0.318274
igsf21	0.0538381	0.0440646	0.222112	880	0.00923824	0.00760619	0.224538	37767	0.997398	0.318571
smad1	-0.0934774	0.0961414	0.331136	1028	0.00365142	0.0159755	0.81921	44017	-0.996605	0.318956
impact	-0.0720997	0.0685027	0.292852	895	-0.00298055	0.0108701	0.783934	38704	-0.996531	0.318992
npc2	0.0409624	0.0522017	0.432845	879	-0.0113879	0.00633335	0.0721722	38155	0.995546	0.319471
cyth3	-0.0866302	0.0881649	0.326085	862	0.00224153	0.0141438	0.874078	37377	-0.995291	0.319595
mmp10	0.0718956	0.0727649	0.323356	1046	-0.00139933	0.0114373	0.902624	45013	0.995068	0.319703
klk15	-0.058201	0.0661354	0.379083	891	0.00833024	0.0099077	0.400474	38537	-0.994884	0.319793
gucy2c	0.124318	0.104644	0.235153	884	0.0191004	0.0159994	0.232555	38105	0.993926	0.320259
serpina4	-0.0305854	0.0292069	0.295298	881	-0.00121386	0.00453738	0.789066	38169	-0.993715	0.320361
amfr	0.0794052	0.0729511	0.276644	1025	0.00592071	0.0125127	0.636091	44031	0.992814	0.320801
csf3r	0.0352472	0.0385617	0.36095	859	-0.00343666	0.00569254	0.546038	37668	0.992412	0.320996
lypd8	-0.0626565	0.0546923	0.252222	1028	-0.00759617	0.00941075	0.419567	44017	-0.992148	0.321125
dnaja4	0.0989332	0.0890471	0.266859	895	0.00953532	0.01386	0.491474	38704	0.991995	0.3212
pdcd5	-0.0626903	0.0712052	0.378834	1060	0.00882273	0.0113448	0.436756	45500	-0.991814	0.321288
pkd2	-0.0594205	0.067389	0.378156	865	0.00836261	0.0114464	0.465033	37510	-0.991645	0.321371
oxct1	-0.0992376	0.0837531	0.236385	880	-0.0151733	0.0132551	0.252336	37767	-0.991378	0.321501
gipc2	0.0421669	0.0432882	0.330274	895	-0.00102618	0.00568652	0.856794	38704	0.989302	0.322515
mstn	0.0663052	0.067083	0.323188	1030	-0.000769669	0.0100763	0.939114	44275	0.988786	0.322768
pdia3	-0.0248203	0.028941	0.391339	880	0.00418183	0.00479368	0.383016	37950	-0.988642	0.322838
ccl26	0.102335	0.107608	0.341826	1050	-0.00534428	0.017319	0.757643	45034	0.987947	0.323178
tnfaip2	-0.0513256	0.0524923	0.328453	893	0.00130113	0.00934889	0.889313	38629	-0.987029	0.323629
cyp24a1	0.116086	0.102464	0.257554	865	0.013763	0.0165712	0.40624	37510	0.985814	0.324224
ctrb1	-0.0736457	0.0716005	0.303923	1047	-0.00241078	0.0104826	0.818109	45114	-0.9844	0.324919
stat2	-0.0885451	0.0863551	0.305484	859	-0.00227983	0.015	0.879196	37668	-0.984222	0.325007
il15	0.05259	0.0401787	0.190856	1050	0.0125653	0.00632487	0.0469671	45034	0.984048	0.325092
c5	0.0132605	0.0181411	0.464994	898	-0.00480817	0.00286996	0.0938754	38862	0.98377	0.325229
tab2	-0.137988	0.118927	0.246255	884	-0.0193413	0.0205939	0.347645	38105	-0.983007	0.325604
rrm2	0.0572413	0.0550548	0.298718	1028	0.00233101	0.00980288	0.812046	44017	0.981931	0.326134
rabep1	-0.0915656	0.087465	0.295442	880	-0.00442343	0.0151983	0.771016	37950	-0.981601	0.326297
hnf1a	0.0804036	0.0779327	0.302499	867	0.00277942	0.0138164	0.840569	37741	0.980748	0.326717
immt	0.0386539	0.0525327	0.462042	893	-0.0135555	0.00863595	0.116502	38610	0.980685	0.326748
cblif	-0.126265	0.115116	0.272957	1049	-0.0128731	0.0139631	0.356566	45058	-0.977862	0.328142
reck	-0.0223034	0.0254599	0.38126	880	0.00287033	0.0039546	0.467953	37767	-0.977042	0.328548
esr1	0.0728241	0.0689703	0.291323	859	0.00468919	0.0112575	0.677018	37668	0.974986	0.329567
masp1	-0.0285892	0.0290455	0.325203	1038	5.76096e-05	0.00452651	0.989846	44691	-0.974512	0.329802
ubxn1	-0.0780165	0.0767822	0.309874	880	-0.00210496	0.0134245	0.875403	37950	-0.973887	0.330112
oplah	-0.0851196	0.0770754	0.269737	880	-0.00898202	0.0133085	0.499737	37767	-0.973427	0.330341
atp6v1g1	-0.082116	0.079541	0.302183	880	-0.00353672	0.0140538	0.801308	37767	-0.972841	0.330632
klk12	-0.185292	0.165717	0.263777	1028	-0.0220344	0.0264889	0.405507	44017	-0.972808	0.330649
tpmt	0.0891857	0.0844321	0.29108	1028	0.00595235	0.0141234	0.673427	44017	0.972293	0.330905
top2b	-0.0958552	0.0913549	0.294355	859	-0.00575916	0.0155349	0.710844	37668	-0.972263	0.33092
aldh3a1	0.0815818	0.0829706	0.325706	1049	-7.85269e-07	0.01287	0.999951	44956	0.971651	0.331224
folr1	0.0338626	0.0428795	0.429874	1048	-0.00811374	0.00548359	0.138976	45031	0.971028	0.331534
adra2a	-0.081847	0.0869384	0.346746	865	0.00356112	0.0139237	0.798138	37510	-0.970036	0.332029
ceacam5	-0.0753176	0.0844319	0.372579	1012	0.00749032	0.0129377	0.562624	43456	-0.96945	0.332321
atp1b2	-0.0344021	0.0352415	0.32925	865	0.000210524	0.00609539	0.972448	37510	-0.967784	0.333152
icam1	0.0308353	0.0364782	0.398134	1042	-0.00490019	0.00573089	0.392529	44922	0.96777	0.333159
scgb1a1	-0.0821012	0.0693985	0.237063	1047	-0.0142391	0.0107764	0.1864	45164	-0.96628	0.333904
ca4	-0.0257983	0.0316483	0.415168	1064	0.00509115	0.00459909	0.268303	45660	-0.965875	0.334107
tppp2	0.0907132	0.0875337	0.300336	884	0.00494646	0.0151697	0.74437	38105	0.965424	0.334332
hao1	0.171074	0.156081	0.273304	1060	0.0186538	0.0250051	0.45567	45479	0.964247	0.334922
fut8	-0.0623428	0.0676474	0.35696	1041	0.00370884	0.0110334	0.736762	44759	-0.963677	0.335208
trem2	0.0615959	0.066372	0.353601	1051	-0.00305214	0.0102414	0.765689	45085	0.962633	0.335732
cd93	0.0405557	0.0438724	0.3555	1008	-0.00201843	0.00592101	0.733186	43408	0.961689	0.336206
nt5c3a	-0.0983736	0.10241	0.336982	1048	0.00137068	0.0168144	0.93503	44962	-0.961104	0.3365
nme1	-0.0232504	0.026458	0.379775	859	0.002477	0.00413615	0.549266	37668	-0.960718	0.336694
crygd	-0.100057	0.111091	0.368008	895	0.00800863	0.0184471	0.66419	38704	-0.959619	0.337247
clec7a	0.0544173	0.0702688	0.438858	1060	-0.0138131	0.0113502	0.223612	45599	0.958567	0.337777
clmp	-0.0292387	0.0323085	0.36568	1060	0.00200204	0.00433152	0.643939	45479	-0.958377	0.337873
sirt2	-0.100366	0.103085	0.330472	1043	-0.00030424	0.0170322	0.985748	44888	-0.957685	0.338222
sorbs1	-0.0448557	0.0470575	0.340743	894	0.000738133	0.00756093	0.922231	38726	-0.956627	0.338756
cpxm2	-0.039432	0.0384947	0.305947	900	-0.00237009	0.00486946	0.626456	38800	-0.955168	0.339493
slmap	-0.105518	0.0977509	0.280676	893	-0.0109806	0.016046	0.493777	38629	-0.954355	0.339904
cd59	0.0318907	0.0371956	0.391438	1019	-0.0038503	0.00443329	0.385127	43494	0.954141	0.340012
adgre2	-0.0371504	0.0357959	0.299584	1053	-0.00260825	0.00545014	0.63225	45311	-0.953982	0.340093
wfikkn2	0.0380959	0.0441237	0.388122	1052	-0.00443433	0.00687404	0.518876	45160	0.952396	0.340896
igfbp2	-0.0851061	0.0805673	0.291056	1064	-0.00737403	0.0130643	0.572458	45590	-0.95237	0.340909
add1	-0.0842031	0.0871245	0.334077	880	-0.000252715	0.0137525	0.985339	37950	-0.951783	0.341207
draxin	-0.0486106	0.0545849	0.373378	1041	0.0039187	0.00820056	0.632754	44759	-0.951661	0.341269
apof	-0.0321937	0.0310208	0.29964	900	-0.00237908	0.0044572	0.593511	38840	-0.951345	0.341429
fabp9	0.0660994	0.0662686	0.318779	1050	0.00225747	0.0106449	0.832053	45034	0.951187	0.341509
vsir	-0.0584136	0.071736	0.415667	1049	0.0107325	0.011798	0.362992	45057	-0.95112	0.341544
ssna1	-0.060352	0.05707	0.290567	893	-0.00527516	0.00989697	0.594031	38629	-0.950883	0.341664
hsd11b1	-0.0496778	0.0505452	0.325914	1050	-0.00103833	0.00793641	0.895909	45034	-0.950649	0.341783
ctsl	0.0251487	0.0345634	0.467015	1052	-0.0079893	0.00459964	0.0824048	45128	0.95038	0.341919
pdrg1	0.0654245	0.061341	0.286465	867	0.00637427	0.00997985	0.523013	37741	0.950162	0.34203
spink6	-0.0658118	0.0662681	0.320882	1060	-0.00213299	0.0104593	0.838408	45479	-0.949177	0.342531
pla2g7	0.0366215	0.0392317	0.350795	1047	-0.00104255	0.00595616	0.861051	45114	0.949165	0.342537
ism2	-0.0485574	0.0461656	0.293173	897	-0.00406779	0.00823403	0.621294	38800	-0.948723	0.342762
ntf4	-0.0465749	0.0508519	0.359939	1028	0.00215749	0.00742237	0.771302	44017	-0.948271	0.342991
oga	-0.0848942	0.0799724	0.288732	893	-0.00800622	0.0136659	0.557976	38629	-0.947694	0.343285
defb4a_defb4b	0.155991	0.185793	0.401331	1032	-0.0220141	0.0285174	0.440146	44469	0.946991	0.343643
hk2	0.0243699	0.0336766	0.469448	1030	-0.00780083	0.00530759	0.141636	44275	0.943638	0.345355
lypd3	-0.0395832	0.040117	0.324022	1045	-0.00124934	0.00646182	0.846692	44893	-0.943392	0.345481
vsnl1	-0.0438379	0.046857	0.34975	895	0.000832703	0.00721722	0.908147	38704	-0.942227	0.346076
naaa	-0.0645944	0.0717456	0.368158	1035	0.0037919	0.0112525	0.736131	44548	-0.941666	0.346364
c9orf40	0.0961067	0.0989086	0.331479	893	0.00179863	0.0157369	0.909005	38629	0.941642	0.346376
spink1	-0.0613384	0.0672731	0.362095	1047	0.00244485	0.00800118	0.75994	45114	-0.941488	0.346455
col5a1	0.0583208	0.0562409	0.300031	880	0.00490159	0.00755568	0.516517	37950	0.94137	0.346515
icam2	0.0338519	0.0396954	0.393967	1064	-0.00394703	0.00607793	0.51608	45660	0.941256	0.346574
prl	0.0982167	0.0929644	0.290983	1060	0.00971909	0.0142717	0.495873	45500	0.940928	0.346742
hla_a	0.035018	0.0385048	0.363362	894	-0.0016652	0.0062239	0.789048	38726	0.940484	0.346969
clec4c	-0.0517671	0.0573048	0.366541	1050	0.00278397	0.00900985	0.757329	45034	-0.940393	0.347016
nptxr	-0.0496087	0.0426155	0.244649	1052	-0.00906096	0.00662764	0.171586	45128	-0.940176	0.347127
lactb2	-0.0765976	0.0736372	0.298486	1052	-0.00636463	0.0127085	0.616504	45128	-0.939877	0.347281
il11	-0.0740855	0.0770146	0.33629	1042	-0.000836607	0.0120908	0.944836	44249	-0.939595	0.347425
lilrb5	0.0641394	0.0863632	0.457846	1064	-0.0179614	0.0134508	0.181772	45660	0.939321	0.347566
lpcat2	0.0650894	0.0523533	0.214048	1043	0.0153279	0.008105	0.0586085	44888	0.939305	0.347574
phldb2	0.0838985	0.10651	0.431086	862	-0.0175051	0.0177315	0.323537	37377	0.939134	0.347662
ep300	-0.0315384	0.0363689	0.386086	859	0.00296993	0.00587126	0.612971	37668	-0.936715	0.348905
irag2	-0.0799405	0.0950747	0.400646	1030	0.0105957	0.0174417	0.543528	44275	-0.936634	0.348947
spred2	-0.0450391	0.0496236	0.364338	859	0.00206076	0.00853861	0.809288	37668	-0.935396	0.349584
rnf31	0.0388055	0.0387163	0.31648	859	0.00199795	0.00713137	0.779354	37668	0.934972	0.349803
rgl2	-0.0478874	0.0658489	0.467278	884	0.0146072	0.0122261	0.232192	38105	-0.933112	0.350762
daam1	-0.0905186	0.0959616	0.345799	880	0.000157189	0.015961	0.992142	37950	-0.932112	0.351279
csf1	0.0380816	0.0374863	0.309922	1053	0.002801	0.00532055	0.598578	45311	0.931819	0.35143
eif2s2	-0.0446035	0.0467263	0.340059	880	-0.000435235	0.00819595	0.95765	37767	-0.931041	0.351832
efcab14	0.0368213	0.0414171	0.374225	893	-0.00203902	0.00520356	0.695171	38629	0.930947	0.351881
itgb6	-0.0330813	0.0392445	0.399449	1042	0.00383448	0.00578985	0.507798	44249	-0.930587	0.352067
tcl1b	-0.092922	0.0935272	0.320687	1030	-0.00477	0.0152437	0.754346	44275	-0.930253	0.35224
man1a2	-0.0304829	0.0304413	0.316927	880	-0.00183335	0.00494368	0.710754	37767	-0.928969	0.352905
ca9	-0.0622243	0.0696169	0.371627	1060	0.00294849	0.00868741	0.734311	45479	-0.928959	0.35291
rpl14	0.0400674	0.0403529	0.321022	880	0.00187211	0.00788844	0.812408	37767	0.928947	0.352917
inpp1	-0.0540082	0.0606496	0.373406	1043	0.0030144	0.0103642	0.771169	44888	-0.926764	0.354049
igf2bp3	0.0384541	0.0501895	0.44378	865	-0.00879622	0.00904623	0.330876	37510	0.92651	0.354181
myh4	-0.0295116	0.0459687	0.52105	865	0.0138126	0.00879318	0.11623	37510	-0.925687	0.354609
eln	0.0423124	0.0514774	0.411319	900	-0.00564519	0.00658593	0.391362	38800	0.924091	0.355439
fgf3	0.0324284	0.0345478	0.348174	859	6.77772e-05	0.00574877	0.990593	37668	0.923987	0.355493
map1lc3a	-0.0418713	0.0348104	0.229369	867	-0.00924319	0.00605446	0.12685	37546	-0.923446	0.355775
icam3	-0.0369421	0.0329653	0.262697	1064	-0.0061691	0.00492015	0.209905	45660	-0.92327	0.355867
bola2_bola2b	0.0604378	0.0654346	0.35593	880	-0.000655765	0.0106737	0.951011	37767	0.92148	0.3568
asah2	0.0708519	0.070144	0.312688	1041	0.00558246	0.0102721	0.586816	44759	0.920685	0.357215
prg3	0.0567914	0.0574208	0.322912	897	0.0032883	0.00933579	0.724672	38800	0.919696	0.357732
eif4b	-0.0571099	0.0678095	0.399864	1041	0.00596524	0.0110902	0.590659	44759	-0.917985	0.358626
gabarap	-0.0600315	0.0568533	0.2913	893	-0.00718704	0.00929313	0.439307	38610	-0.917315	0.358977
hrg	-0.0407843	0.0379048	0.282236	890	-0.00557989	0.00601041	0.353221	38650	-0.917296	0.358987
mllt1	-0.0693909	0.0721656	0.336546	862	-0.0021457	0.0133093	0.871923	37377	-0.916365	0.359476
bcan	-0.0521771	0.0454309	0.251029	1041	-0.0100989	0.00682128	0.138745	44759	-0.915936	0.359701
prkab1	-0.0629968	0.0595211	0.290122	1042	-0.00769355	0.0104908	0.463343	44249	-0.915033	0.360174
vmo1	-0.0775017	0.079068	0.327221	1043	-0.00427586	0.0130535	0.743244	44888	-0.913744	0.360852
gga1	0.0815176	0.0736303	0.268503	1025	0.0131749	0.0132979	0.321813	44031	0.913411	0.361027
znf75d	0.046206	0.0665891	0.487929	884	-0.0155264	0.0117796	0.187488	38105	0.912892	0.3613
lyar	0.0499243	0.0630777	0.428852	1028	-0.00843214	0.0103909	0.417087	44017	0.912848	0.361323
rgma	0.0338987	0.0408263	0.406548	1060	-0.00376358	0.00601398	0.531446	45500	0.912652	0.361426
lamp3	0.0644205	0.0686405	0.348192	1058	0.00104305	0.0107676	0.922831	45526	0.912169	0.36168
havcr2	0.0413294	0.0545365	0.448724	1047	-0.00879224	0.00684057	0.198691	45114	0.911902	0.36182
hyal1	-0.0280005	0.0278724	0.315326	1039	-0.00229353	0.00439172	0.601506	44880	-0.91107	0.362259
cntn3	-0.0289492	0.0371805	0.436385	1047	0.00535685	0.00635101	0.398974	45114	-0.909516	0.363078
bsg	0.0304075	0.0285497	0.287087	1058	0.00420439	0.00390195	0.281258	45526	0.909353	0.363164
mucl3	-0.0466124	0.0512071	0.362936	862	0.000525876	0.00839	0.950023	37377	-0.908428	0.363652
il31ra	0.0425913	0.0472141	0.367265	857	-0.00075585	0.00762399	0.921027	37517	0.906356	0.364747
ccer2	-0.0908361	0.0890416	0.307938	880	-0.00954526	0.0117746	0.417561	37767	-0.905074	0.365426
hmgcl	-0.0551398	0.0569131	0.332892	880	-0.0029492	0.00953646	0.757129	37767	-0.904413	0.365776
acp5	-0.0207629	0.0408097	0.611017	1058	0.0165521	0.00627766	0.00837524	45299	-0.903737	0.366135
prr5	-0.0455001	0.0536137	0.396306	859	0.00356759	0.0088794	0.687846	37668	-0.902908	0.366575
pros1	-0.0466149	0.0478709	0.330438	898	-0.00320474	0.00470407	0.495705	38862	-0.90247	0.366807
tbc1d5	-0.0635139	0.0873915	0.467527	1050	0.0165618	0.0155599	0.287158	45034	-0.9021	0.367004
lpo	-0.0602585	0.0747693	0.420475	1014	0.00796585	0.0113815	0.483997	43604	-0.902074	0.367018
dnaja1	-0.0250934	0.0496035	0.613071	862	0.020348	0.00889896	0.0222272	37377	-0.901698	0.367217
phospho1	0.0378309	0.0409853	0.356204	1041	0.000610927	0.00575812	0.915505	44759	0.899296	0.368495
cxcl12	-0.0371164	0.0488233	0.447297	1042	0.00730104	0.00768574	0.342144	44249	-0.898692	0.368817
cd300c	0.0404983	0.0488544	0.407315	1060	-0.00376936	0.00657522	0.566466	45500	0.898017	0.369176
mtpn	-0.0312489	0.0353621	0.377074	1030	0.000997542	0.00628522	0.873896	44275	-0.897822	0.369281
gimap8	0.0615135	0.064636	0.341522	862	0.00285143	0.00984232	0.772039	37377	0.897234	0.369594
dnajc6	-0.096509	0.0967747	0.318917	880	-0.0085203	0.0163145	0.601498	37767	-0.896561	0.369953
sestd1	-0.0588965	0.0722218	0.41498	1025	0.00678301	0.0124045	0.584507	44031	-0.896289	0.370098
s100a13	-0.0214117	0.0430242	0.618846	859	0.0175768	0.00677588	0.00948955	37668	-0.895168	0.370697
tdrkh	-0.0927238	0.0978987	0.343792	1025	-0.00405125	0.0163892	0.804763	44031	-0.893326	0.371682
gpi	-0.0471216	0.0517508	0.362778	900	-0.000190064	0.0091601	0.983446	38840	-0.892996	0.371859
bach1	-0.0744311	0.0824587	0.366921	1050	0.00023887	0.0143286	0.986699	45034	-0.892174	0.3723
clta	0.0467341	0.0544793	0.391185	1030	-0.00253414	0.00905667	0.779625	44275	0.892105	0.372336
il3ra	-0.0397288	0.0405196	0.327075	1042	-0.00320495	0.00603683	0.595491	44249	-0.891548	0.372635
anxa10	-0.116732	0.103712	0.260626	1025	-0.0232537	0.0155397	0.134556	44031	-0.891374	0.372728
smc3	0.0687518	0.0665408	0.301789	862	0.00877492	0.010305	0.394487	37377	0.890736	0.373071
fgf12	-0.061786	0.057315	0.281335	859	-0.0101158	0.00897217	0.259553	37668	-0.890666	0.373109
prdx6	0.0728027	0.073936	0.325011	1060	0.00619379	0.0117194	0.597149	45479	0.889791	0.373578
egfr	-0.01622	0.0200894	0.419624	1064	0.00185157	0.00312184	0.553116	45660	-0.888887	0.374064
akr7l	0.0893945	0.0883041	0.311659	859	0.0100997	0.0134923	0.454132	37668	0.887671	0.374718
pts	0.0789005	0.068236	0.247835	1021	0.017632	0.0110481	0.110511	43831	0.886348	0.37543
bloc1s3	-0.0431032	0.0453591	0.342235	895	-0.002353	0.00784384	0.764194	38704	-0.885252	0.376021
commd9	-0.0444423	0.0491295	0.365926	893	-0.000439299	0.0076118	0.953978	38610	-0.885093	0.376107
pdcl2	-0.0625735	0.0653726	0.338745	862	-0.00402125	0.0102928	0.696031	37377	-0.884771	0.37628
tbca	-0.0849473	0.0953519	0.373238	880	0.000671019	0.0165412	0.967642	37950	-0.884706	0.376315
foxj3	-0.0352295	0.0485529	0.468289	859	0.00838687	0.00877793	0.339357	37668	-0.883996	0.376698
dsg4	0.0657778	0.0604588	0.27686	1034	0.011739	0.00945545	0.214426	44751	0.883077	0.377194
dctpp1	-0.0328933	0.0390126	0.399339	1052	0.00196123	0.00603064	0.745023	45128	-0.882932	0.377273
ppbp	0.0984784	0.102129	0.335179	891	0.00730902	0.0160708	0.649255	38573	0.881841	0.377863
ccn2	0.0690077	0.0647254	0.286598	1047	0.011126	0.0109705	0.310507	45088	0.881692	0.377944
bcl7a	-0.0675784	0.0751228	0.368601	862	-0.000523367	0.0122488	0.965919	37377	-0.880972	0.378333
sumf2	-0.0587239	0.0620655	0.344284	1060	-0.0033317	0.0100896	0.741242	45500	-0.880915	0.378364
psip1	0.047396	0.0731631	0.517248	1050	-0.0178477	0.0126721	0.159013	45034	0.878675	0.379577
rspo3	-0.0351111	0.0391153	0.369587	1060	-0.000433263	0.00529005	0.934725	45479	-0.878556	0.379642
tff2	-0.0995711	0.0818843	0.224259	1053	-0.0269842	0.011265	0.0166061	45235	-0.878187	0.379842
ddx58	0.0710067	0.0635642	0.264219	1028	0.0143405	0.0111758	0.199436	44017	0.878014	0.379936
adam15	-0.0326236	0.0374922	0.384426	1030	0.000674625	0.0058974	0.908926	44275	-0.877349	0.380297
nfe2	-0.0811998	0.0831287	0.32894	880	-0.00725862	0.0144956	0.616552	37767	-0.876255	0.380891
mzt1	-0.0538838	0.0603035	0.371776	1028	-0.000326293	0.0101272	0.974297	44017	-0.875868	0.381102
a1bg	-0.0174311	0.020774	0.401647	898	0.000986518	0.00331842	0.76625	38862	-0.875472	0.381317
agt	0.0238027	0.0278563	0.393068	900	-0.000863	0.00425725	0.83936	38840	0.875298	0.381412
rassf2	0.0782406	0.0662244	0.2377	1028	0.019454	0.0112797	0.084591	44017	0.875085	0.381528
susd5	0.0364125	0.0464417	0.433226	871	-0.00463397	0.00658946	0.48191	37738	0.875065	0.381539
mtdh	-0.111873	0.112373	0.31975	859	-0.012315	0.0178745	0.490845	37668	-0.874961	0.381595
glb1	-0.0440289	0.0496379	0.375284	1041	-7.49745e-05	0.00806197	0.99258	44759	-0.874038	0.382097
nap1l4	-0.0420531	0.0488397	0.389447	889	0.00114425	0.00792436	0.885188	38554	-0.873056	0.382632
serpinc1	-0.0200492	0.0181351	0.269219	897	-0.00402664	0.00283963	0.156194	38788	-0.872878	0.382729
lep	-0.0881509	0.119209	0.459792	1052	0.0171694	0.0188447	0.362247	45128	-0.872654	0.382852
arid3a	-0.0298994	0.0429846	0.486878	867	0.00820866	0.00771582	0.287393	37546	-0.872603	0.382879
dynlt1	-0.0895719	0.0885332	0.31195	867	-0.0112062	0.0156245	0.473244	37741	-0.871685	0.38338
itih3	-0.0450981	0.0443908	0.309895	1053	-0.00590753	0.00724935	0.415131	45299	-0.871312	0.383584
ddx25	-0.0413163	0.0464104	0.373587	867	-0.000543716	0.00718721	0.939698	37741	-0.868174	0.385299
sag	-0.056121	0.0567078	0.322622	867	-0.0062215	0.0100489	0.535841	37546	-0.866442	0.386248
il18	-0.0513749	0.0556099	0.355781	1048	-0.00262852	0.0089333	0.768577	44939	-0.865482	0.386774
pdgfc	-0.0327859	0.0296163	0.268545	1028	-0.00682476	0.00557349	0.220769	44017	-0.86146	0.388985
dner	-0.0320062	0.0322106	0.320622	1049	-0.0039396	0.00499271	0.430075	45014	-0.861063	0.389203
selenop	-0.0242811	0.0278783	0.384007	898	-1.604e-06	0.00429284	0.999702	38862	-0.860763	0.389368
dxo	-0.0478421	0.0523121	0.360674	895	-0.00222865	0.00879048	0.79986	38704	-0.859893	0.389848
col9a2	-0.0492459	0.0496497	0.321535	884	-0.0059489	0.00859963	0.48909	38105	-0.859256	0.390199
ifnl1	-0.0571234	0.0572899	0.318956	1025	-0.00734897	0.00862727	0.394313	44031	-0.859129	0.390269
pof1b	-0.0409068	0.0551263	0.458258	859	0.00701057	0.00871959	0.421401	37668	-0.858554	0.390586
tgfb1	-0.0354003	0.0455768	0.4375	1058	0.0042203	0.00739579	0.56825	45526	-0.858091	0.390842
arg1	0.0672184	0.0630978	0.286986	1043	0.0124191	0.0101512	0.221183	44829	0.857456	0.391193
txnrd1	-0.0434731	0.0514028	0.397895	1047	0.00120652	0.00898046	0.893127	45114	-0.856236	0.391867
sdhb	0.0540486	0.070039	0.440501	893	-0.006926	0.0129115	0.59167	38629	0.856155	0.391912
grhpr	-0.0628172	0.0720086	0.383247	900	-0.000313084	0.0122813	0.979662	38800	-0.855654	0.392189
ahsg	-0.0290517	0.0311791	0.351708	900	-0.00202911	0.00519861	0.696304	38840	-0.854887	0.392614
kctd5	-0.0345375	0.0524467	0.510373	884	0.0109062	0.00870409	0.210216	37964	-0.854782	0.392672
ctsf	-0.0409468	0.049153	0.405008	1052	0.00147102	0.00770207	0.848534	45247	-0.852572	0.393897
psrc1	0.0588236	0.0677101	0.385184	1028	0.00028853	0.0114854	0.979958	44017	0.85232	0.394036
anxa3	-0.059184	0.0830773	0.476377	1059	0.0125506	0.0135037	0.352679	45424	-0.852281	0.394058
muc13	-0.0470499	0.0670366	0.48293	1025	0.0106619	0.0097428	0.273813	44031	-0.85195	0.394242
nid2	0.101204	0.0877859	0.249237	1047	0.0254519	0.0141991	0.0730593	45114	0.851846	0.3943
prss27	-0.0415141	0.0481248	0.388537	1050	-1.73268e-05	0.00758332	0.998177	44983	-0.851764	0.394345
ntprobnp	0.134603	0.179074	0.452426	1052	-0.0187427	0.0188328	0.319636	45128	0.851626	0.394422
cd40	-0.0533481	0.0587107	0.363738	1051	-0.002701	0.00960718	0.778601	45089	-0.851333	0.394584
pla2g2a	0.0675269	0.0747229	0.366365	1044	0.00330778	0.0107261	0.757791	45012	0.850711	0.39493
ssc5d	-0.0495052	0.051569	0.337288	1053	-0.00508029	0.00841549	0.546057	45299	-0.850217	0.395204
l3hypdh	-0.093387	0.101545	0.357997	900	-0.00585365	0.0171673	0.733123	38800	-0.849955	0.39535
dbn1	-0.0479777	0.0576277	0.405334	859	0.00171554	0.00998947	0.863647	37668	-0.849644	0.395523
dpep2	0.023507	0.035445	0.507352	1043	-0.00695647	0.00549409	0.205458	44888	0.849315	0.395706
cfi	0.0179576	0.0248298	0.469731	898	-0.00342564	0.00417625	0.412069	38862	0.849262	0.395736
pspn	-0.0672382	0.122315	0.582635	1050	0.0377901	0.0186971	0.0432672	45034	-0.848808	0.395988
ncam2	-0.0368357	0.0351925	0.295484	1047	-0.00666393	0.0053178	0.210162	45114	-0.847713	0.396598
fkbp1b	-0.120573	0.125225	0.335846	1053	-0.012956	0.0214441	0.54573	45234	-0.847056	0.396964
babam1	-0.0227392	0.0311749	0.465953	859	0.0040456	0.00559001	0.469243	37668	-0.845689	0.397726
mavs	-0.0831492	0.10397	0.424047	1028	0.0060493	0.0179621	0.736284	44017	-0.8454	0.397887
angpt2	0.0456549	0.0685693	0.505671	1060	-0.0125456	0.00724306	0.0832638	45479	0.844089	0.39862
armcx2	-0.0669044	0.0641196	0.297041	867	-0.0119134	0.0119949	0.320616	37546	-0.843008	0.399224
sowaha	-0.0406024	0.0554544	0.46426	867	0.00681781	0.0094649	0.471329	37741	-0.842931	0.399267
mfge8	0.05413	0.0546871	0.322495	1047	0.00750285	0.00839378	0.371402	45114	0.842749	0.399369
sncg	-0.0636564	0.0939838	0.498359	1041	0.0163136	0.013487	0.226446	44759	-0.842263	0.399641
metap1d	-0.09441	0.0955468	0.323331	1050	-0.0128849	0.0158201	0.415384	45034	-0.841787	0.399907
dlgap5	-0.0662714	0.0630945	0.293842	894	-0.0126096	0.0098196	0.199104	38726	-0.840381	0.400695
zpr1	0.0879247	0.113073	0.437023	867	-0.00830296	0.0183516	0.650956	37546	0.840029	0.400892
ncr1	-0.0510842	0.0504986	0.311966	1048	-0.00825554	0.00704042	0.240966	44966	-0.83999	0.400914
mylpf	0.0594253	0.0664138	0.371158	867	0.00315275	0.00926019	0.73351	37741	0.839184	0.401366
ccdc50	0.0588214	0.0957286	0.539069	894	-0.0224215	0.0145232	0.122635	38726	0.839078	0.401426
nedd4l	0.0534396	0.0587843	0.363565	859	0.00352723	0.00939876	0.707449	37668	0.838428	0.401791
dffa	-0.0584189	0.0743877	0.432437	1060	0.00487264	0.0130131	0.708077	45599	-0.838106	0.401971
tbr1	0.0485189	0.0589035	0.410337	867	-0.0013716	0.00914495	0.880778	37741	0.83696	0.402615
map3k5	-0.0837829	0.115123	0.466922	1028	0.0137769	0.0192927	0.47517	44017	-0.835784	0.403276
angptl3	-0.0316254	0.0459096	0.491062	1050	0.00714075	0.00672271	0.288158	45141	-0.835492	0.40344
vnn1	0.0832911	0.0862578	0.334502	900	0.0102847	0.0142954	0.471875	38840	0.834985	0.403726
clstn3	-0.034382	0.041135	0.403473	895	0.00031109	0.00589756	0.957932	38704	-0.83486	0.403797
nlgn1	-0.0677776	0.0875946	0.439282	867	0.0061147	0.0130212	0.638646	37741	-0.834403	0.404054
slc39a14	-0.028207	0.0379205	0.457141	1025	0.00387603	0.00639588	0.544504	44031	-0.834277	0.404125
ogn	0.0351335	0.0631579	0.578139	1047	-0.0179656	0.00806966	0.0259978	45114	0.833956	0.404306
tap1	-0.0746996	0.0737823	0.31161	884	-0.0124665	0.0112308	0.266993	38105	-0.833864	0.404358
agbl2	-0.0822028	0.10575	0.437177	867	0.00714034	0.0173923	0.681407	37546	-0.833652	0.404477
irak1	-0.0676318	0.0758652	0.372883	1042	-0.00345031	0.013508	0.798395	44249	-0.832893	0.404905
ndufs6	0.0712567	0.0920856	0.439222	1028	-0.00645636	0.0151286	0.669552	44017	0.832759	0.404981
pdgfb	0.101141	0.105351	0.337257	1053	0.0124869	0.0164396	0.447519	45311	0.831449	0.40572
ptpn9	-0.0506204	0.0462044	0.273574	858	-0.011727	0.00741807	0.113917	37598	-0.831125	0.405903
vwc2l	-0.0536596	0.0603412	0.374099	894	-0.00298282	0.00899524	0.740194	38726	-0.830657	0.406167
il4r	0.0399854	0.0511435	0.434493	1050	-0.00283032	0.00691034	0.682118	45034	0.829629	0.406749
sod1	0.0535004	0.0561109	0.340575	1024	0.00629104	0.00947877	0.506887	44223	0.829605	0.406762
arsa	-0.038314	0.0536197	0.475047	1047	0.00665789	0.00850112	0.433527	45114	-0.828373	0.40746
selplg	-0.0158946	0.0316221	0.615323	1050	0.0106162	0.00499463	0.0335489	45034	-0.828095	0.407617
rasgrf1	-0.0474081	0.047486	0.318387	862	-0.00754494	0.00839999	0.36908	37377	-0.826638	0.408442
decr1	-0.106738	0.112647	0.343579	1050	-0.0124671	0.0184491	0.4992	45034	-0.82587	0.408878
cd70	0.046442	0.0515522	0.367863	1050	0.00340066	0.00823765	0.679741	45034	0.824448	0.409685
cdh2	0.0296524	0.0475314	0.532863	1052	-0.0099253	0.00697556	0.154781	45128	0.82384	0.41003
zbp1	0.0472256	0.0468966	0.314212	859	0.00807896	0.00795532	0.309854	37668	0.822987	0.410515
cd4	0.0255089	0.0376451	0.498166	1048	-0.00581786	0.0057511	0.311731	44959	0.822616	0.410726
fcn1	0.0710194	0.067919	0.296007	895	0.0144875	0.0109094	0.184193	38769	0.821809	0.411186
dtymk	-0.0643102	0.0801011	0.422267	900	0.0022683	0.0133155	0.864736	38800	-0.819929	0.412256
lypd1	0.0509875	0.0713861	0.475236	1025	-0.00829841	0.0122043	0.496536	44031	0.818619	0.413004
tmprss11b	0.0663688	0.086042	0.440709	867	-0.00506955	0.014635	0.729045	37546	0.818517	0.413062
cr1	-0.0366531	0.0444071	0.409373	893	0.000101639	0.00687035	0.988197	38694	-0.817945	0.413388
zhx2	0.0331573	0.0360461	0.357896	895	0.00322119	0.00662943	0.627046	38704	0.816797	0.414045
mmp15	0.0505315	0.0524641	0.335725	900	0.00702696	0.0095163	0.460268	38800	0.815912	0.41455
siglec15	0.0784656	0.0867632	0.366015	1025	0.00667335	0.0149469	0.655259	44031	0.815439	0.414821
sh2d1a	0.0372804	0.0631181	0.554886	1050	-0.0149465	0.0111391	0.179669	45034	0.814854	0.415156
faslg	-0.0325067	0.0457201	0.477245	1060	0.00516992	0.00712485	0.468076	45599	-0.814244	0.415505
il22	0.0850075	0.0882434	0.335644	893	0.0123945	0.013035	0.341682	38610	0.814039	0.415622
tpbgl	-0.0458525	0.046856	0.32806	867	-0.00720434	0.0079966	0.367634	37741	-0.813073	0.416176
cenpj	-0.0620528	0.0808552	0.443017	884	0.00456935	0.0135477	0.735909	38105	-0.81264	0.416424
lrig3	-0.0278561	0.0320367	0.384816	855	-0.00148517	0.00538696	0.782782	37542	-0.811752	0.416934
actn2	0.0814929	0.072791	0.26322	865	0.0217128	0.0112962	0.0545959	37510	0.811543	0.417054
marco	0.0170867	0.0307836	0.578974	1052	-0.00822454	0.00509534	0.106506	45128	0.811193	0.417255
akr1b10	-0.0535483	0.0680767	0.431739	867	0.00249171	0.011802	0.83279	37741	-0.811091	0.417313
fap	0.0337162	0.0358037	0.346562	1064	0.00438392	0.00520499	0.39965	45660	0.810731	0.41752
mia	-0.0588573	0.0516424	0.254669	1052	-0.0166226	0.00700146	0.0175929	45247	-0.810415	0.417702
eif5a	0.025219	0.0340092	0.458538	1042	-0.00272298	0.00574221	0.635357	44249	0.810133	0.417864
ren	-0.132734	0.133991	0.322099	1052	-0.023564	0.0143656	0.100949	45128	-0.810116	0.417873
il17d	0.0373143	0.0393054	0.342667	1042	0.00508005	0.00640856	0.427958	44249	0.80941	0.418279
bola1	0.0338782	0.0694631	0.625876	867	-0.0229806	0.0104808	0.0283393	37546	0.809385	0.418294
sugp1	-0.0367844	0.0457825	0.421924	893	0.000809139	0.00786443	0.918054	38629	-0.80928	0.418354
ptprz1	-0.0339482	0.0402249	0.398918	900	-0.0010354	0.00634002	0.870274	38800	-0.808242	0.418952
cdc27	-0.0554426	0.0681671	0.416216	1028	0.000467148	0.0118077	0.968442	44017	-0.808152	0.419003
igf1r	-0.0294903	0.0272839	0.280006	1043	-0.00720967	0.00410503	0.0790437	44888	-0.807534	0.419359
nomo1	-0.0175801	0.0293514	0.549336	1047	0.00638712	0.00470797	0.174895	45114	-0.806254	0.420096
serpina9	0.0555228	0.0864089	0.520654	1034	-0.0149342	0.0135874	0.271723	44691	0.805493	0.420535
sfrp4	0.0544469	0.0552927	0.325043	880	0.00944565	0.00814123	0.245965	37950	0.805191	0.42071
itih5	-0.055691	0.0561293	0.321375	893	-0.00999015	0.00851949	0.240954	38610	-0.804986	0.420828
fkbp4	-0.0348965	0.0495728	0.481625	1041	0.00555767	0.00847938	0.512192	44759	-0.804375	0.421181
fgfr2	-0.0271086	0.0332093	0.414516	1052	-0.000191387	0.00430947	0.964577	45247	-0.803794	0.421516
clec6a	0.0519114	0.0594361	0.38265	1028	0.00364849	0.00896987	0.684194	44017	0.802922	0.42202
galnt5	-0.0320381	0.0334582	0.338545	900	-0.00485768	0.00520043	0.350262	38800	-0.802731	0.42213
mamdc2	-0.0435183	0.0562186	0.439081	900	0.00188102	0.0065188	0.772925	38800	-0.802175	0.422452
pithd1	0.0714824	0.0903869	0.429251	859	-0.00204819	0.0153651	0.893956	37316	0.802005	0.42255
ido1	-0.0826932	0.0833873	0.32163	880	-0.0152412	0.0122423	0.213154	37767	-0.800322	0.423524
wasl	-0.051218	0.0791569	0.517778	859	0.0127383	0.0116033	0.27229	37668	-0.799425	0.424044
gsn	-0.0195284	0.0227506	0.390918	900	-0.00113115	0.00359345	0.75293	38694	-0.798748	0.424437
c1rl	0.0156997	0.0235873	0.505837	897	-0.00338621	0.00386385	0.380827	38793	0.798521	0.424568
dpp10	-0.0353833	0.0496627	0.476332	1050	0.00462107	0.00674509	0.493284	45034	-0.798193	0.424759
map2k1	-0.0600467	0.0724142	0.407208	893	-0.00147862	0.0123402	0.904625	38629	-0.797299	0.425278
mfap3	-0.051744	0.0564712	0.35973	1030	-0.00613973	0.00931951	0.510025	44275	-0.79679	0.425573
pgd	0.0540668	0.0618932	0.382598	900	0.00407248	0.0103683	0.694483	38800	0.79665	0.425654
sparc	0.0767837	0.0862093	0.373313	1052	0.00728933	0.0135481	0.590557	45247	0.796338	0.425835
usp8	-0.0892358	0.103934	0.390771	1030	-0.0052727	0.0185255	0.775938	44275	-0.795318	0.426429
fcer1a	-0.0258035	0.0286899	0.368686	894	-0.00271582	0.00454009	0.549719	38726	-0.794842	0.426705
lsm1	0.0537084	0.0707498	0.447949	1028	-0.00315056	0.0105955	0.766201	44017	0.794799	0.42673
serpina1	0.0061577	0.00955412	0.519414	885	-0.00152297	0.00153981	0.322637	38126	0.793671	0.427387
abo	-0.0892882	0.167071	0.593176	900	0.0450437	0.0274269	0.100533	38840	-0.793418	0.427534
gp1ba	0.0358354	0.0389949	0.358321	1042	0.0045183	0.00621909	0.467523	44919	0.793086	0.427728
tmsb10	-0.0766019	0.0900627	0.395221	1047	-0.00434103	0.0147795	0.768974	45114	-0.791749	0.428507
erbb2	-0.0238213	0.0318963	0.455329	1052	0.00169388	0.00492514	0.730904	45247	-0.790574	0.429193
ctrl	-0.0580731	0.0825992	0.482195	895	0.00800529	0.0129212	0.535561	38704	-0.790377	0.429308
ghrl	-0.104516	0.105352	0.321394	1052	-0.0203249	0.015846	0.199621	45128	-0.790255	0.429379
ca8	-0.0248687	0.0361581	0.491779	859	0.00393262	0.00507687	0.438572	37668	-0.788802	0.430227
nit1	-0.0459323	0.0563063	0.41486	880	-0.00101729	0.0091429	0.911407	37767	-0.787379	0.43106
chga	-0.111804	0.141402	0.429342	897	0.000263119	0.016416	0.987212	38800	-0.787252	0.431134
guk1	0.0450013	0.0467912	0.336447	865	0.00768243	0.00775419	0.321816	37510	0.78683	0.431382
mad1l1	0.0572306	0.0597058	0.338013	1036	0.00966935	0.00977002	0.322328	44618	0.786139	0.431786
ifng	0.0876577	0.128576	0.495543	1042	-0.0148699	0.0218652	0.496462	44249	0.786125	0.431794
eif4ebp1	0.0577896	0.0779395	0.458576	1052	-0.00419644	0.0126852	0.740787	45128	0.784981	0.432465
nptx2	-0.0314842	0.0406025	0.438294	897	0.000717895	0.00634201	0.909875	38800	-0.783605	0.433272
ccl20	-0.0926143	0.116449	0.426607	1060	-0.0004511	0.0169659	0.978788	45599	-0.783177	0.433523
cd33	0.0818075	0.0994012	0.410694	1052	0.00307109	0.0154408	0.842346	45247	0.78272	0.433791
ctla4	-0.0228162	0.0340013	0.50237	897	0.00414342	0.00566799	0.46477	38800	-0.782107	0.434152
bap18	-0.0458463	0.0779727	0.556696	895	0.0159863	0.0134703	0.235321	38704	-0.781428	0.434551
scin	0.0400144	0.0779708	0.607945	867	-0.0218873	0.0140268	0.118676	37546	0.781366	0.434588
sparcl1	-0.0297465	0.0323928	0.358671	1049	-0.00412937	0.00523954	0.430633	45152	-0.780681	0.43499
arhgap25	-0.0525834	0.0653982	0.421555	1028	-0.000749059	0.0115959	0.948495	44017	-0.780423	0.435142
slc4a1	-0.038927	0.0548209	0.477843	897	0.00433821	0.00918409	0.636672	38800	-0.778363	0.436355
sema7a	-0.0280276	0.038036	0.461364	1062	0.00185482	0.00523898	0.723309	45513	-0.778288	0.436399
apoa4	-0.0323827	0.0488788	0.507815	898	0.00593621	0.00669507	0.375271	38862	-0.776705	0.437333
pon3	-0.0292739	0.042501	0.491114	1053	0.00400092	0.00564757	0.478681	45311	-0.776095	0.437693
sez6l2	0.0189781	0.0318328	0.551184	1043	-0.00597985	0.00456701	0.19042	44888	0.776087	0.437698
fxyd5	-0.0753946	0.0711705	0.289686	1042	-0.019363	0.0125488	0.122835	44249	-0.775328	0.438146
lilrb1	-0.0335683	0.0332943	0.313574	1064	-0.00743454	0.00527895	0.159038	45660	-0.775248	0.438193
ptk7	-0.0320107	0.047456	0.500124	1025	0.00519957	0.00723396	0.472285	44031	-0.775147	0.438253
prkra	-0.0610489	0.0765027	0.425058	1028	-0.00106215	0.0130559	0.935161	44017	-0.772938	0.439559
ivd	0.0448006	0.0599539	0.455084	1025	-0.0021051	0.00948252	0.824316	44031	0.772757	0.439666
mphosph8	-0.0602652	0.0833563	0.469855	1030	0.00508266	0.0146062	0.727856	44275	-0.772193	0.44
hspb6	0.0487121	0.0546937	0.373328	1060	0.00610482	0.00748819	0.414928	45479	0.771816	0.440223
ngrn	-0.0201476	0.0256532	0.432437	895	-7.67039e-05	0.00427302	0.985678	38704	-0.771763	0.440255
tnni3	-0.0769996	0.102373	0.452134	1030	0.00293736	0.0161275	0.855479	44275	-0.771329	0.440512
tmod4	0.0363258	0.0457409	0.427319	862	0.000545939	0.0077509	0.943847	37377	0.771236	0.440567
ogt	0.0703647	0.0777618	0.365779	884	0.00996103	0.0120827	0.409716	38105	0.767568	0.442744
crx	-0.1086	0.127426	0.394268	1030	-0.00974213	0.0203379	0.631931	44275	-0.766112	0.44361
tsc1	0.0747479	0.0868336	0.38958	859	0.00732118	0.0146368	0.616944	37668	0.765703	0.443853
egln1	0.059831	0.0676503	0.376675	1050	0.0073698	0.0110199	0.503643	45034	0.765389	0.44404
camlg	0.0499417	0.059538	0.401803	867	0.00368369	0.010394	0.723037	37741	0.765373	0.444049
pnliprp2	0.252603	0.332936	0.448195	1051	-0.00545123	0.0562839	0.922844	45085	0.764243	0.444722
nek7	-0.0606008	0.0906921	0.504179	884	0.00944463	0.0142701	0.508074	38105	-0.762956	0.445489
reep4	-0.0563493	0.0723347	0.436182	894	-0.000555278	0.0120139	0.963135	38726	-0.760908	0.446712
dll1	-0.0335757	0.0438432	0.44396	1052	3.87909e-05	0.00572863	0.994597	45247	-0.760236	0.447113
klrf1	0.0311879	0.053095	0.557092	859	-0.00960222	0.00792472	0.225642	37668	0.759831	0.447356
lxn	0.0763697	0.0850823	0.36961	1037	0.0110358	0.0129966	0.395814	44552	0.759085	0.447802
nme3	-0.0241529	0.0314797	0.443104	1052	-8.45226e-05	0.00447023	0.984915	45160	-0.756974	0.449066
mrpl46	0.0229524	0.032184	0.47591	1025	-0.00172834	0.00528776	0.743778	44031	0.756717	0.449219
hs6st2	0.0312501	0.0462397	0.499332	859	-0.00404274	0.00635684	0.524802	37668	0.756147	0.449561
lbr	-0.0394701	0.0814693	0.628147	1060	0.0229165	0.0133841	0.0868641	45500	-0.755639	0.449865
angptl7	0.0310919	0.0441982	0.481921	1060	-0.00271749	0.00698714	0.697331	45479	0.755566	0.449909
pdgfrb	-0.0273929	0.0414197	0.508532	1064	0.00427837	0.00660186	0.516952	45660	-0.755112	0.450182
dkk3	-0.0350551	0.03805	0.357109	1064	-0.00615173	0.00562681	0.274272	45660	-0.751443	0.452386
klrc1	0.0398384	0.0652536	0.541681	867	-0.00991326	0.0116398	0.394401	37546	0.750588	0.452901
clec1a	-0.0460987	0.0475774	0.332814	1030	-0.0101284	0.00627891	0.106733	44275	-0.749538	0.453533
ptges2	-0.0581212	0.0622177	0.350489	852	-0.0108706	0.0105397	0.302362	37374	-0.748772	0.453995
pklr	0.0651811	0.0813936	0.423421	1052	0.00362226	0.0127737	0.77674	45167	0.747166	0.454963
vsig2	-0.0790859	0.0947546	0.404145	893	-0.00789399	0.0113132	0.485326	38610	-0.746031	0.455648
fam20a	-0.0249243	0.034808	0.474147	900	0.00137355	0.00567191	0.808653	38800	-0.745677	0.455863
fhip2a	0.033967	0.0509208	0.504915	865	-0.00461247	0.0093201	0.620678	37510	0.745257	0.456116
robo4	0.0178801	0.0214941	0.405714	880	0.00167423	0.00338458	0.62084	37767	0.744792	0.456397
megf9	0.0165958	0.0227023	0.464929	1062	-0.000548928	0.00398397	0.890411	45513	0.743833	0.456978
il6	-0.0698982	0.0997339	0.483556	1043	0.00504493	0.0148596	0.734231	44888	-0.743227	0.457344
nid1	-0.0196089	0.0440463	0.656276	1050	0.01353	0.00730416	0.0639788	45141	-0.742229	0.457948
park7	-0.0358293	0.0617756	0.562046	1047	0.0105856	0.010158	0.297375	45114	-0.741391	0.458457
dkkl1	0.0625891	0.0945217	0.508012	1043	-0.00851496	0.0163172	0.601785	44888	0.741287	0.45852
bcl2l15	0.0652446	0.0676637	0.335195	859	0.014418	0.0112994	0.201964	37668	0.740904	0.458752
gnpda1	-0.0187932	0.0398929	0.637693	880	0.0111302	0.00639318	0.0817013	37767	-0.740642	0.45891
fas	0.0314485	0.0452736	0.487439	1062	-0.00234236	0.00630493	0.710258	45513	0.739235	0.459764
nubp1	-0.0841169	0.112593	0.45521	893	0.000190654	0.0189149	0.991958	38610	-0.738432	0.460252
polr2f	0.0338647	0.0427011	0.427922	1043	0.00193395	0.00682086	0.776769	44888	0.738411	0.460264
rangap1	0.0463648	0.0636136	0.46626	1028	-0.00109276	0.00939438	0.907399	44017	0.738024	0.4605
wif1	0.0398704	0.04651	0.391505	1060	0.00520665	0.00657563	0.428476	45479	0.737957	0.46054
bcat1	-0.0210734	0.0362427	0.561082	900	0.00601766	0.00590145	0.307881	38800	-0.737773	0.460652
igfbp6	0.0334167	0.0480565	0.486983	1047	-0.00226682	0.00573502	0.692653	44916	0.737301	0.460939
nenf	-0.0974838	0.129191	0.450708	893	-0.000926865	0.0215907	0.965758	38610	-0.737171	0.461019
adamtsl5	-0.0416421	0.0467027	0.372824	900	-0.00678927	0.00748997	0.364704	38800	-0.736854	0.461211
ern1	-0.0330786	0.0413039	0.423427	893	-0.00221405	0.00724169	0.759807	38610	-0.736028	0.461713
il10	-0.0667344	0.0873817	0.445213	1042	-0.00144622	0.0157065	0.926637	44249	-0.735376	0.46211
vps28	-0.061925	0.0721371	0.390887	884	-0.00805142	0.0128124	0.529739	38105	-0.735314	0.462149
sned1	0.0300431	0.036855	0.415196	880	0.00257477	0.00626564	0.681123	37767	0.734767	0.462481
art3	0.0354266	0.0479013	0.459723	1053	-5.87354e-05	0.00653202	0.992826	45299	0.734008	0.462944
slurp1	0.0300529	0.0497798	0.546186	887	-0.00684018	0.00707248	0.333473	38519	0.733759	0.463096
sh3glb2	-0.0517321	0.0818702	0.527628	895	0.0090061	0.0130027	0.488545	38704	-0.732701	0.463741
tnfrsf8	0.0334028	0.0568113	0.556685	1060	-0.00868491	0.00859182	0.312101	45500	0.732503	0.463861
f2	-0.0154795	0.0189584	0.414433	898	-0.00144198	0.0028348	0.610985	38862	-0.732296	0.463988
lhb	-0.0720007	0.10244	0.482306	1028	0.0039379	0.0167438	0.814066	44017	-0.731587	0.464421
myl6b	0.0483285	0.106384	0.649738	867	-0.0303852	0.017791	0.0876628	37741	0.72977	0.465531
rapgef2	-0.0430038	0.0590054	0.466311	884	0.000648137	0.0101495	0.949083	38105	-0.729088	0.465948
cd3d	0.02117	0.0397412	0.594381	867	-0.00819339	0.00656656	0.212132	37546	0.728981	0.466014
lto1	-0.0347724	0.0443513	0.433207	1042	-0.00194438	0.00792634	0.80622	44249	-0.728635	0.466225
ampd3	0.0685597	0.0888657	0.440617	895	0.00305406	0.0139169	0.8263	38704	0.728254	0.466458
rrp15	-0.0871858	0.114938	0.448329	867	-0.00258775	0.0175014	0.882454	37546	-0.727648	0.466829
kdr	-0.0226082	0.0299937	0.451159	1052	-0.000520439	0.00493438	0.916002	45247	-0.726647	0.467442
prss22	-0.0245967	0.0413614	0.552216	859	0.00585134	0.00672715	0.38441	37668	-0.726599	0.467472
acan	0.0173418	0.0355548	0.625831	1045	-0.00879995	0.00552544	0.111252	44677	0.726531	0.467513
ahnak2	0.0345407	0.0381581	0.365608	880	0.00652969	0.005607	0.244204	37767	0.726279	0.467668
hrc	-0.032205	0.0473677	0.496751	880	0.00250283	0.00666099	0.707109	37767	-0.725594	0.468088
gcnt1	-0.0383	0.0423619	0.366144	1043	-0.00722756	0.00661828	0.274812	44888	-0.724709	0.468631
ermap	0.0331281	0.0578258	0.566867	859	-0.00917423	0.00873181	0.293418	37668	0.723347	0.469467
lmnb2	0.0326974	0.0394824	0.407807	895	0.0038705	0.0055244	0.483544	38704	0.723076	0.469633
rbp5	0.0488815	0.0771128	0.526289	1043	-0.00743767	0.0115013	0.517843	44888	0.722356	0.470075
il32	0.0372601	0.0532866	0.484558	1050	-0.00165777	0.00816275	0.839066	45034	0.721929	0.470338
rbfox3	0.0378507	0.0561287	0.500261	894	-0.00297497	0.00746571	0.690276	38726	0.721008	0.470905
lrrc37a2	-0.0377589	0.0506845	0.456482	893	-0.000756465	0.00817386	0.926264	38629	-0.720741	0.471069
vegfa	0.0489854	0.0680022	0.471469	1056	-0.000666871	0.011183	0.952449	45452	0.72048	0.471229
neo1	-0.0156262	0.0280524	0.577644	894	0.00481078	0.00421104	0.253286	38726	-0.720455	0.471245
vwc2	-0.0440398	0.0550701	0.424067	1037	-0.00402945	0.00765053	0.598412	44614	-0.719623	0.471757
igfbp1	0.0744191	0.156711	0.63497	1063	-0.0396535	0.0253277	0.117445	45587	0.718592	0.472392
cd6	-0.0564596	0.0632224	0.372044	1058	-0.010441	0.010264	0.309042	45526	-0.718478	0.472463
cd36	0.0493633	0.0495426	0.319347	859	0.0132691	0.00858153	0.122054	37668	0.717859	0.472844
dut	-0.116095	0.126729	0.359871	893	-0.024386	0.0197272	0.216407	38629	-0.715048	0.47458
enox2	-0.019703	0.0290213	0.497374	865	0.00133471	0.00539461	0.804588	37510	-0.712698	0.476033
clec10a	0.0406595	0.0453772	0.370442	1041	0.00799303	0.00688731	0.245833	44759	0.711737	0.476628
f13b	-0.0266448	0.0320429	0.405896	890	-0.00365308	0.00489014	0.455051	38650	-0.709316	0.478129
lrp11	0.0351454	0.0506794	0.48816	1052	-0.00112146	0.00687407	0.870406	45128	0.709119	0.47825
eloa	0.0570412	0.0652507	0.38222	1043	0.010174	0.0106726	0.340454	44888	0.708844	0.478421
rnf41	-0.0479335	0.0732382	0.512945	1028	0.00467424	0.0130944	0.721119	44017	-0.707097	0.479506
stx4	-0.0407397	0.0654916	0.534039	1043	0.00629251	0.0117259	0.591524	44888	-0.706901	0.479628
ppt1	0.0320736	0.0875834	0.714301	867	-0.0306347	0.0147006	0.0371756	37741	0.706106	0.480122
lamb1	-0.0170408	0.0390366	0.662557	880	0.0108238	0.00578735	0.0614563	37767	-0.70609	0.480132
nudt2	-0.0527076	0.0617384	0.393454	1043	-0.00845491	0.0108783	0.437029	44888	-0.705904	0.480248
itgb1	0.0188071	0.0267186	0.481655	1048	-0.000267858	0.00412423	0.948216	45076	0.705565	0.480459
elavl4	0.038525	0.0956943	0.687354	867	-0.0298561	0.0161892	0.0651612	37546	0.704568	0.481079
gp1bb	-0.0627051	0.0790905	0.428097	865	-0.00625021	0.0129687	0.629846	37510	-0.704395	0.481187
myom3	0.0906103	0.11989	0.449985	880	0.0053109	0.0177041	0.764193	37950	0.703849	0.481527
atp6v1f	-0.04737	0.0769888	0.538505	1022	0.00745214	0.01286	0.562268	43963	-0.702348	0.482462
acsl1	0.0414233	0.0518323	0.424407	865	0.00469466	0.0070898	0.507866	37510	0.702069	0.482636
cilp	0.0432192	0.0718719	0.547768	897	-0.00767241	0.010511	0.465431	38800	0.700635	0.483531
smpdl3a	-0.0416558	0.0809276	0.606851	1052	0.0156928	0.0125127	0.209797	45243	-0.700319	0.483728
ager	0.0230604	0.0607327	0.704242	1050	-0.0197309	0.00779905	0.0114124	45007	0.698847	0.484648
ripk4	0.0719154	0.081672	0.378813	865	0.0141186	0.0130732	0.280166	37510	0.698775	0.484693
tnfrsf13c	-0.0429974	0.0528103	0.415725	1042	-0.0056982	0.00800814	0.476747	44249	-0.698303	0.484987
guca2a	0.0378304	0.0501888	0.451164	1042	0.00250158	0.00638442	0.695188	44892	0.69829	0.484996
cd300lf	0.0474015	0.0795406	0.551343	1060	-0.00862991	0.0112189	0.441762	45479	0.697533	0.485469
chchd6	-0.0258814	0.0332614	0.436705	893	-0.00237597	0.0054396	0.662265	38610	-0.697423	0.485538
chp1	0.0247829	0.081558	0.761302	867	-0.0329044	0.0141069	0.0196797	37546	0.696966	0.485824
nfatc3	0.036978	0.0719014	0.607161	1042	-0.0137745	0.011587	0.234529	44249	0.696871	0.485883
notch2	0.0192108	0.0247145	0.437182	897	0.00178489	0.00386636	0.644337	38800	0.696617	0.486042
sirpa	-0.0571541	0.0663703	0.389357	1057	-0.0103068	0.0109224	0.345357	45231	-0.69648	0.486128
gmpr	-0.0378497	0.0630779	0.548604	1060	0.00656523	0.00957488	0.492923	45599	-0.696153	0.486333
cox5b	0.0579955	0.081545	0.477115	1043	0.000497139	0.0133117	0.970209	44888	0.6959	0.486492
celsr2	-0.0312842	0.0363008	0.389032	880	-0.00573572	0.00549823	0.296865	37950	-0.695862	0.486516
nudt15	0.0472736	0.0656651	0.47177	865	0.00106656	0.00990827	0.914279	37510	0.695801	0.486554
wfdc12	-0.0451002	0.0846182	0.594157	1058	0.0142713	0.0123066	0.246201	45403	-0.694334	0.487473
mmut	-0.0433188	0.0568934	0.446626	865	-0.00327222	0.00952627	0.731229	37510	-0.694223	0.487542
lamp2	-0.0151576	0.0247909	0.541059	1022	0.00225466	0.00382926	0.555999	43710	-0.694135	0.487598
carhsp1	0.0548624	0.063946	0.391123	1025	0.0100676	0.010075	0.317675	44031	0.691974	0.488954
kazald1	-0.0589813	0.0601516	0.327046	1043	-0.0169453	0.00876233	0.0531346	44888	-0.691537	0.489228
hif1a	-0.0503181	0.068348	0.461809	859	-0.00234282	0.0125338	0.851724	37668	-0.690413	0.489935
wfikkn1	-0.0349564	0.0507115	0.490777	1038	0.000473996	0.00796629	0.952554	44614	-0.690202	0.490067
insr	-0.0169386	0.0226675	0.455111	859	-0.00113759	0.00322578	0.72435	37668	-0.690124	0.490116
mrpl58	-0.0876024	0.0865779	0.311893	894	-0.0271592	0.0137675	0.0485371	38726	-0.689474	0.490525
mfap5	0.0469909	0.0555234	0.397562	1064	0.00831309	0.00822303	0.312045	45660	0.689088	0.490768
ift20	-0.0347188	0.0512578	0.498374	867	0.00104002	0.00845135	0.90206	37741	-0.688334	0.491243
ssc4d	-0.0941516	0.15242	0.536899	1049	0.0119833	0.0238549	0.615429	45058	-0.687959	0.491479
il19	0.0571061	0.0983103	0.561452	1031	-0.0110365	0.0134917	0.413349	43994	0.686701	0.492271
col9a1	0.0214731	0.0601991	0.721387	1050	-0.0202675	0.00892453	0.0231526	45034	0.685879	0.492789
rarres2	-0.0368851	0.0646368	0.568357	1055	0.00788573	0.0098223	0.422072	45372	-0.684792	0.493475
ubac1	0.0321882	0.0421863	0.445637	1043	0.00295547	0.00672702	0.660415	44888	0.684297	0.493788
snx18	0.0373776	0.0474566	0.431131	893	0.00438683	0.00860083	0.610021	38629	0.684034	0.493953
mif	-0.0489441	0.0807367	0.544502	1044	0.00696669	0.0131208	0.595445	45040	-0.683541	0.494265
inhbb	-0.056103	0.0793022	0.47947	880	-0.00155015	0.0100815	0.877798	37950	-0.682419	0.494974
mybpc1	0.081129	0.0901091	0.368181	900	0.0190093	0.0133661	0.154977	38800	0.681922	0.495288
lrp1	-0.0231314	0.0328671	0.481724	1043	-0.000451132	0.00510453	0.929576	44888	-0.681885	0.495312
ifnl2	-0.0577768	0.0782445	0.460464	867	-0.003816	0.0119626	0.749733	37546	-0.681722	0.495415
tnc	0.0475608	0.0634263	0.453508	1053	0.00390315	0.00904658	0.666143	45299	0.681423	0.495604
kir2dl3	-0.0769431	0.0950993	0.418656	1028	-0.0113874	0.0147496	0.440089	44017	-0.681195	0.495748
ncf2	0.11081	0.10773	0.303908	1049	0.0365897	0.0167061	0.028515	44959	0.680814	0.495989
il1a	-0.0518226	0.0717845	0.470508	1042	-0.00244973	0.0108411	0.821229	44249	-0.68008	0.496454
calb1	-0.0554445	0.0614713	0.367289	1043	-0.0132823	0.00826695	0.108132	44888	-0.679764	0.496654
itpa	-0.0508547	0.0728545	0.485347	865	-0.000549645	0.0130131	0.966309	37510	-0.679729	0.496676
nrp1	-0.0265438	0.035014	0.448566	1055	-0.0025537	0.00524722	0.62649	45372	-0.677592	0.49803
fabp5	-0.0601354	0.0820056	0.463534	1057	-0.00385501	0.0133695	0.773085	45347	-0.677356	0.49818
itih1	-0.0174295	0.0222845	0.434341	898	-0.00216143	0.00358338	0.546391	38862	-0.676455	0.498752
ezr	0.0172866	0.029066	0.552148	1060	-0.00263714	0.00477495	0.580755	45500	0.676398	0.498788
havcr1	0.0655749	0.0951907	0.491051	1058	0.000779055	0.0121035	0.948679	45413	0.675258	0.499512
lrpap1	-0.0358654	0.0651533	0.582109	1060	0.00871826	0.0108628	0.422221	45500	-0.674972	0.499694
siglec6	-0.0362142	0.0412793	0.380524	1060	-0.00806643	0.00636573	0.205103	45479	-0.673921	0.500362
plg	-0.0201538	0.0260184	0.438786	879	-0.00242022	0.00431415	0.574803	37884	-0.672398	0.50133
cspg5	-0.0290762	0.0589838	0.622172	867	0.0110862	0.00946596	0.241538	37546	-0.672303	0.501391
fstl3	0.0373152	0.0524877	0.477285	1049	0.00178056	0.00643491	0.782009	45013	0.671977	0.501598
jam3	-0.0398645	0.0629627	0.526805	880	0.00293168	0.00959477	0.75995	37950	-0.671949	0.501616
sh3gl3	-0.0560282	0.106853	0.60017	878	0.0165661	0.0160357	0.301573	37901	-0.67186	0.501673
cd248	0.0430713	0.0497426	0.386786	897	0.0093044	0.0076278	0.222548	38800	0.67099	0.502227
chl1	0.0197166	0.0367332	0.591553	1047	-0.00513842	0.00589282	0.383225	45228	0.668096	0.504073
inpp5d	-0.0399167	0.0664182	0.548002	880	0.0050779	0.0113239	0.653851	37767	-0.667807	0.504257
cadps	0.0372739	0.0527465	0.479968	867	0.001694	0.00820729	0.836478	37741	0.666524	0.505076
ppp1r12b	-0.0508526	0.0849309	0.549492	884	0.00643061	0.0137062	0.638947	38105	-0.665853	0.505505
steap4	0.0408429	0.0830086	0.622822	867	-0.0151732	0.0141814	0.284655	37546	0.665186	0.505931
serpina7	-0.0160436	0.0223183	0.47242	898	-0.00102996	0.00357547	0.7733	38862	-0.664233	0.506541
cep170	-0.048977	0.0812811	0.546955	880	0.0058656	0.0149202	0.694225	37767	-0.66364	0.506921
mri1	-0.0535459	0.0807596	0.507489	867	0.000728751	0.0130406	0.955435	37741	-0.663459	0.507037
ftcd	0.0832775	0.107835	0.440163	891	0.0109409	0.0172034	0.524797	38629	0.66243	0.507696
adamts1	-0.0205463	0.0370213	0.57905	859	0.00428548	0.0060496	0.478707	37668	-0.661962	0.507995
cd209	0.0424495	0.0441031	0.336018	1051	0.0128622	0.00732152	0.0789655	45215	0.66181	0.508093
ccn1	0.0687158	0.0932705	0.46145	1041	0.00629113	0.0145697	0.665893	44813	0.661267	0.508441
igsf9	-0.0421036	0.107077	0.69426	900	0.0294072	0.0178106	0.0987249	38800	-0.658792	0.51003
ghrhr	0.0360871	0.0643655	0.575153	1025	-0.0068545	0.0105446	0.515666	44031	0.658376	0.510296
galnt7	-0.0173707	0.0250164	0.487604	1043	-0.000755066	0.00397774	0.849449	44888	-0.655949	0.511857
ddr1	-0.018836	0.0317512	0.55315	1060	0.00216343	0.00437721	0.621132	45500	-0.655177	0.512354
klk8	-0.039928	0.0470871	0.396661	1013	-0.00879983	0.00688044	0.200917	43609	-0.65413	0.513028
cdsn	-0.0269748	0.0565781	0.633624	1057	0.0104111	0.00818236	0.203244	45461	-0.65398	0.513125
cd79b	-0.0384233	0.0636884	0.546439	1060	0.00359269	0.00854717	0.674242	45599	-0.653849	0.513209
gmpr2	-0.0410358	0.0784321	0.600967	880	0.0109368	0.0129848	0.399638	37950	-0.653746	0.513276
stk11	-0.0566723	0.0838552	0.499297	1030	-0.00108972	0.0140954	0.938377	44275	-0.65367	0.513324
cdc26	-0.0560259	0.0782319	0.474088	889	-0.00416057	0.0135259	0.758389	38554	-0.653276	0.513578
pkn3	-0.0907838	0.0869235	0.296583	884	-0.0332269	0.0144228	0.0212408	38105	-0.653225	0.513611
ppm1b	0.0595882	0.0714429	0.404476	859	0.0122763	0.0122166	0.314959	37668	0.652758	0.513912
rnf4	-0.0580174	0.0751748	0.44046	884	-0.00827978	0.012636	0.51231	38105	-0.652474	0.514096
snx5	-0.0247568	0.0328469	0.451231	880	-0.00301685	0.00580816	0.603474	37767	-0.651746	0.514565
inpp5j	0.028956	0.0566079	0.609115	894	-0.00829339	0.00801326	0.300695	38726	0.651529	0.514705
wars	-0.0273872	0.0469953	0.560178	1047	0.00345209	0.00728252	0.635485	45114	-0.648481	0.516674
itga2	-0.0179843	0.0454351	0.692331	880	0.0117454	0.00650193	0.0708556	37950	-0.647736	0.517155
yap1	0.028589	0.0444898	0.520652	895	-0.000428197	0.00538681	0.936643	38704	0.647491	0.517314
ctbs	-0.0257945	0.035409	0.466519	885	-0.0026492	0.00516127	0.607755	38272	-0.64682	0.517749
tcl1a	-0.0840437	0.126041	0.50505	1040	-0.00165006	0.0188193	0.930132	44695	-0.646539	0.51793
crtac1	-0.0258431	0.0357362	0.469738	1064	-0.00244083	0.00575767	0.671622	45660	-0.646526	0.517939
robo1	0.0169525	0.0319958	0.59634	1052	-0.00391564	0.00466519	0.401289	45160	0.645389	0.518675
stx8	-0.0315667	0.0540987	0.559681	1050	0.00388355	0.00951863	0.68328	45034	-0.645375	0.518684
cd177	0.0948159	0.150989	0.530165	1044	-0.00378069	0.0246202	0.877957	45050	0.644493	0.519256
cstb	0.0339925	0.055111	0.537501	1051	-0.00192528	0.00854482	0.821735	44484	0.64404	0.51955
serpina11	-0.0288183	0.050606	0.569162	1064	0.00415305	0.00782574	0.595636	45660	-0.643877	0.519655
hsd17b3	-0.043205	0.055015	0.432475	865	-0.007322	0.00931355	0.431775	37510	-0.643091	0.520165
col1a1	-0.0181139	0.0305119	0.552861	1064	0.00174372	0.00477636	0.715059	45660	-0.642986	0.520233
cacnb1	-0.0498204	0.0672874	0.459251	867	-0.00596889	0.0114385	0.601795	37546	-0.642488	0.520556
lcp1	-0.0359229	0.0577992	0.534422	897	0.00162047	0.00914216	0.859311	38800	-0.641572	0.521151
l1cam	-0.0268668	0.0371049	0.46918	1052	-0.0028072	0.00551581	0.610799	45247	-0.641374	0.52128
epha4	-0.0208198	0.0371608	0.575443	880	0.00325434	0.00543723	0.549491	37950	-0.641013	0.521514
c1r	0.0105737	0.019125	0.580489	898	-0.00190702	0.00366675	0.603008	38862	0.640913	0.521579
ly75	-0.0366818	0.0466662	0.432019	1050	-0.00639644	0.00742998	0.3893	45034	-0.640905	0.521584
cnpy2	0.0485261	0.0701672	0.489359	1030	0.00296525	0.0116507	0.799101	44275	0.640549	0.521816
il18bp	0.0222962	0.0430257	0.604423	1053	-0.00548431	0.00586367	0.349637	45299	0.63976	0.522329
tnfrsf1a	0.0276662	0.0497857	0.578531	1047	-0.0043851	0.00587217	0.455212	45114	0.639354	0.522593
il25	-0.0239627	0.0400743	0.550027	858	0.00199427	0.00658311	0.761939	37252	-0.639155	0.522722
jchain	0.0284902	0.0740882	0.700654	1042	-0.019436	0.0117933	0.0993483	44249	0.638838	0.522929
myom1	-0.0355857	0.0588278	0.545396	867	0.0023774	0.0090712	0.793259	37546	-0.637788	0.523612
bid	0.0567652	0.0748788	0.448566	1050	0.00829021	0.0130972	0.526753	45034	0.637697	0.523671
proc	-0.0229204	0.0348072	0.510366	1050	-0.000515898	0.00488175	0.915838	45223	-0.637434	0.523842
il10rb	0.0226845	0.0430558	0.5984	1053	-0.00498764	0.00558895	0.372178	45311	0.637358	0.523892
mog	0.0146277	0.0455622	0.748236	1060	-0.0146701	0.00639827	0.0218624	45479	0.636782	0.524267
tnfsf11	-0.0410702	0.0731855	0.574796	1050	0.00612886	0.0118442	0.604842	45034	-0.63664	0.524359
psme2	0.0322807	0.044648	0.469843	1032	0.00350332	0.00717976	0.625592	44552	0.636362	0.52454
amot	-0.0451256	0.049014	0.357478	880	-0.0136093	0.00787908	0.0841273	37950	-0.634855	0.525523
tmprss11d	0.0255066	0.0526158	0.627959	891	-0.00813303	0.00728296	0.264121	38638	0.633307	0.526533
sprr1b	-0.0662682	0.11753	0.573007	884	0.00878513	0.0161251	0.585887	38105	-0.632662	0.526955
abhd14b	0.042916	0.0649448	0.508883	1037	0.00136765	0.0110591	0.901579	44624	0.63067	0.528256
entpd2	-0.0347113	0.0536399	0.517701	1028	-0.000511346	0.00845541	0.951777	44017	-0.629808	0.52882
akap12	-0.0210799	0.0304851	0.489445	880	-0.00172386	0.00406816	0.671754	37950	-0.629356	0.529116
snu13	-0.033683	0.069657	0.628825	865	0.0108391	0.0125262	0.386871	37510	-0.629071	0.529303
igbp1	-0.0404489	0.0706832	0.567293	894	0.0045765	0.0117864	0.697807	38726	-0.628327	0.52979
rcc1	0.0403387	0.0654566	0.537877	893	-0.00123098	0.00987509	0.900797	38610	0.627966	0.530026
ace	-0.0164126	0.0339095	0.628497	900	0.00510703	0.00500815	0.307856	38840	-0.627808	0.53013
fhit	-0.0422472	0.0872221	0.628232	1025	0.0131779	0.0142123	0.35382	44031	-0.627176	0.530544
idua	-0.0247991	0.0555461	0.655356	1060	0.0104542	0.00892237	0.241331	45479	-0.626635	0.530899
aifm1	-0.0960112	0.127933	0.453136	1041	-0.0149718	0.0202912	0.46061	44816	-0.625631	0.531557
cd86	-0.0295124	0.0370105	0.425428	893	-0.00613835	0.00551027	0.265292	38629	-0.624667	0.532189
b2m	0.0170871	0.0442741	0.699634	898	-0.0107706	0.00597455	0.0714359	38862	0.623557	0.532918
cd80	0.0103445	0.0419527	0.805294	900	-0.0161241	0.00650113	0.0131353	38800	0.623472	0.532974
fga	-0.0336653	0.0396523	0.396106	881	-0.00867251	0.00604647	0.151492	37953	-0.623096	0.533222
mmp9	0.055554	0.0750074	0.459075	1042	0.00824354	0.0118951	0.488301	45044	0.62296	0.533311
nup50	0.0244144	0.0354819	0.491588	865	0.00195432	0.00645756	0.762165	37510	0.62277	0.533436
timp4	0.0468371	0.0525963	0.373402	1047	0.013786	0.00764886	0.0714962	45114	0.621851	0.53404
cfd	0.0153637	0.0313608	0.624324	898	-0.0042562	0.00385095	0.269064	38862	0.620955	0.53463
palm2	0.0326985	0.0562109	0.560909	895	-0.00249493	0.00777908	0.748422	38704	0.620186	0.535136
stx16	0.0369409	0.0639878	0.563856	1028	-0.00331966	0.0111667	0.766253	44017	0.619824	0.535374
tnf	0.028582	0.0498904	0.566841	1029	-0.00260593	0.0073656	0.723492	44203	0.618425	0.536295
csh1	0.0197784	0.0320702	0.537575	900	-0.000394281	0.006008	0.947676	38840	0.61826	0.536404
atxn10	-0.0677384	0.0846076	0.423539	1025	-0.0147635	0.0139035	0.288307	44031	-0.617838	0.536682
tank	-0.0591122	0.0801123	0.460763	1042	-0.00898902	0.0135345	0.506595	44249	-0.616919	0.537288
fam3b	-0.0295779	0.0428751	0.490435	1043	-0.00284486	0.00660371	0.666618	44888	-0.616244	0.537734
myo9b	-0.0481178	0.0698441	0.49102	1042	-0.00435744	0.0129251	0.736021	44249	-0.616083	0.537839
bcl2	-0.0440022	0.0596837	0.461161	893	-0.0067251	0.010305	0.514014	38629	-0.615471	0.538244
rnaseh2a	-0.0350037	0.0538755	0.516044	894	-0.00134366	0.00960685	0.888768	38726	-0.615073	0.538506
eif5	0.0333833	0.0500234	0.504725	865	0.00225374	0.00839498	0.788344	37510	0.613718	0.539402
ndrg1	-0.0527265	0.078576	0.502356	1025	-0.0038638	0.0130699	0.767518	44031	-0.613425	0.539595
lilra5	0.0262233	0.0428566	0.540748	1049	-0.000349498	0.00641501	0.956552	45058	0.613207	0.539739
lgmn	-0.0271206	0.0418097	0.516696	1053	-0.0011388	0.00697646	0.870334	45311	-0.612955	0.539906
capn3	0.0428825	0.0415044	0.30179	893	0.0170886	0.00712006	0.0163967	38610	0.612524	0.540191
duox2	0.0636556	0.0888281	0.473774	1030	0.00872143	0.0137793	0.526778	44275	0.611124	0.541118
dnajb1	-0.0657633	0.10571	0.534006	1043	-0.000406587	0.0168859	0.98079	44888	-0.610524	0.541515
il18rap	-0.137785	0.198531	0.487826	1036	-0.0150335	0.0328837	0.647549	44472	-0.609986	0.541871
cdh1	0.0377187	0.0497655	0.448671	1010	0.0070378	0.00762092	0.35576	43636	0.609406	0.542256
gpr15l	-0.034486	0.0785417	0.660712	893	0.0138933	0.0116278	0.232159	38629	-0.609328	0.542307
lhpp	0.0497674	0.0710162	0.48359	1051	0.00604835	0.0115115	0.599295	45169	0.607689	0.543394
cst1	0.0670961	0.131273	0.609416	769	-0.0134743	0.020038	0.501309	33831	0.606733	0.544028
lif	0.0262837	0.0582385	0.651861	1025	-0.00955303	0.00991437	0.335275	44031	0.606617	0.544105
pcdh12	-0.0195993	0.0313123	0.531521	894	-0.000405655	0.00481896	0.932915	38726	-0.605842	0.544619
gstm4	-0.0563306	0.0888003	0.526021	865	-0.00198813	0.0137666	0.885172	37510	-0.604738	0.545353
fus	-0.0233335	0.0441664	0.5974	1027	0.0037779	0.00773668	0.625333	43948	-0.60464	0.545418
fdx2	0.0458359	0.0706837	0.516857	865	0.0026897	0.0108992	0.80508	37510	0.603282	0.546321
klk11	0.019723	0.0428869	0.645696	1042	-0.0063728	0.00581098	0.272786	44825	0.60297	0.546529
atp6ap2	0.0258481	0.0452667	0.568114	1028	-0.0018444	0.00776799	0.81232	44017	0.602948	0.546543
cpq	-0.0234822	0.041712	0.573604	894	0.0019748	0.00662522	0.765649	38730	-0.602748	0.546676
cd302	0.0238565	0.0462191	0.605852	1043	-0.00422289	0.00585941	0.471096	44888	0.602704	0.546705
dpp4	0.0188076	0.0340001	0.580273	1031	-0.00195928	0.00567334	0.729834	44273	0.602458	0.546869
unc5d	-0.0168382	0.0344326	0.624953	859	0.00411643	0.0051423	0.423424	37668	-0.601895	0.547244
pglyrp1	0.0374728	0.0563699	0.506346	1062	0.0032016	0.00816225	0.694879	45443	0.601694	0.547378
gstp1	0.0336906	0.0754536	0.655327	1016	-0.0123965	0.0132844	0.350743	43751	0.601547	0.547476
tmem106a	-0.056077	0.0792775	0.479534	893	-0.00780521	0.0134749	0.562432	38610	-0.600287	0.548315
ldlr	-0.0526372	0.0665456	0.429125	1056	-0.0122447	0.0106121	0.248569	45219	-0.599416	0.548895
nrp2	-0.0188346	0.0373887	0.614544	1047	0.003814	0.00546013	0.484857	45114	-0.599401	0.548905
pgm2	0.0585355	0.0827891	0.479731	867	0.00848857	0.0115079	0.460745	37741	0.598754	0.549337
txnl1	-0.0696394	0.11585	0.547919	866	0.0006551	0.0193141	0.972943	37472	-0.598513	0.549498
ptp4a3	0.0352342	0.0662983	0.595245	859	-0.00489453	0.0101939	0.631128	37668	0.598245	0.549676
osmr	0.0204728	0.0253287	0.41911	1055	0.00516526	0.00383611	0.178153	45372	0.597541	0.550146
rabgap1l	-0.0414831	0.0706087	0.556991	1042	0.00124592	0.0117543	0.915585	44249	-0.596938	0.550549
psapl1	-0.0436798	0.0669191	0.514103	893	-0.00341775	0.00949129	0.71878	38629	-0.59569	0.551382
mcam	0.0225	0.0427623	0.598885	1053	-0.00322315	0.0063543	0.611989	45299	0.595006	0.55184
snca	-0.0840793	0.137783	0.541869	880	-0.00105753	0.0222174	0.962036	37950	-0.594869	0.551931
thsd1	-0.0289736	0.038919	0.456806	850	-0.00554448	0.00652872	0.39575	37370	-0.5937	0.552713
crtam	0.0202416	0.0642438	0.752768	1041	-0.0183262	0.00967439	0.058191	44759	0.593643	0.552751
nit2	-0.0477284	0.0806936	0.554351	898	0.000917038	0.0143365	0.948998	38654	-0.593546	0.552816
prr4	-0.0518817	0.0825044	0.529623	871	-0.00236631	0.0133648	0.859466	37675	-0.592432	0.553561
pcsk7	-0.0304296	0.0506161	0.54787	893	-1.90059e-05	0.00861295	0.998239	38610	-0.592296	0.553653
fh	-0.0342933	0.0815127	0.674071	867	0.0148954	0.0162151	0.358304	37546	-0.591851	0.55395
spon1	-0.0264626	0.0479184	0.5809	1052	0.00213434	0.00620413	0.730834	45160	-0.591844	0.553955
vcan	0.0154819	0.0381772	0.685172	1060	-0.0073473	0.00570905	0.198116	45500	0.591404	0.55425
maged1	-0.0223525	0.0529138	0.672798	1028	0.00937504	0.00924498	0.310556	44017	-0.590661	0.554748
nsfl1c	-0.0326202	0.0797144	0.682466	1060	0.0150565	0.0127883	0.239055	45500	-0.590543	0.554827
gage2a	-0.050143	0.0844992	0.553061	862	0.000217576	0.0120894	0.985641	37377	-0.589981	0.555204
cst5	0.0395591	0.0689955	0.566528	1032	-0.00154311	0.0105456	0.883663	44248	0.588885	0.555939
eif4e	-0.0570568	0.10332	0.580932	859	0.00462045	0.0174428	0.791094	37668	-0.588625	0.556113
yod1	0.045715	0.0778816	0.557371	865	-0.000687655	0.0122848	0.955361	37510	0.588533	0.556174
rictor	0.0305883	0.0616916	0.620145	859	-0.0060685	0.00921793	0.510326	37668	0.58767	0.556754
egflam	0.0185644	0.0407329	0.648675	893	-0.00561903	0.00586424	0.337975	38629	0.587648	0.556769
bcl2l11	-0.0325092	0.0503837	0.518918	1050	-0.002502	0.00835067	0.764471	45034	-0.587558	0.556829
fam3c	-0.025383	0.0424326	0.549839	1049	-0.000251965	0.005677	0.964599	45058	-0.587027	0.557186
ca11	-0.0213696	0.0363036	0.556235	1028	0.000240882	0.00611694	0.968588	44017	-0.586998	0.557205
nmnat1	0.0948787	0.0918514	0.301864	1041	0.0403499	0.0144797	0.00532771	44759	0.586421	0.557593
f9	0.0146882	0.025987	0.572051	1050	-0.000689521	0.00368959	0.851753	45223	0.58587	0.557963
cngb3	0.0218482	0.0556112	0.69451	867	-0.0112538	0.0103981	0.279128	37546	0.5851	0.55848
arsb	-0.0332309	0.0657121	0.613171	1043	0.00570734	0.0106033	0.590399	44888	-0.584992	0.558553
timm8a	-0.0697139	0.0963905	0.469719	895	-0.0125551	0.0165834	0.449002	38704	-0.584407	0.558946
notch3	-0.0232638	0.0472754	0.622757	1064	0.00456357	0.00645845	0.479816	45660	-0.583205	0.559755
osm	-0.0307594	0.0878954	0.726444	1044	0.0211523	0.0141823	0.13585	44822	-0.583067	0.559849
hhex	-0.0621487	0.0889917	0.485131	895	-0.00971595	0.0148151	0.511948	38704	-0.581188	0.561114
spaca5_spaca5b	-0.0275372	0.0336073	0.412789	894	-0.0077468	0.00559082	0.165868	38726	-0.580888	0.561316
nadk	0.0585212	0.0667265	0.380671	1052	0.0194134	0.0109918	0.0773752	45128	0.578297	0.563064
tex33	0.0236918	0.0472869	0.61648	884	-0.00399438	0.00757887	0.598167	38105	0.578117	0.563185
klrb1	-0.0277522	0.0507585	0.584666	1060	0.00187467	0.00720021	0.794585	45599	-0.577897	0.563333
mcee	-0.0451061	0.0470105	0.337572	894	-0.01755	0.00811457	0.0305649	38726	-0.577629	0.563514
eda2r	-0.0372452	0.0612311	0.543138	1060	-0.00169965	0.00713834	0.811803	45479	-0.576609	0.564204
mmp7	-0.0408427	0.0614969	0.506749	1027	-0.00500114	0.00943614	0.596115	44203	-0.576077	0.564563
mki67	-0.0230426	0.0498291	0.643889	859	0.00599649	0.00774694	0.438908	37668	-0.575855	0.564713
col4a1	0.03419	0.061036	0.575489	1052	-0.0012252	0.00766964	0.873082	45128	0.575707	0.564813
atp1b4	0.0141205	0.0482385	0.769806	862	-0.0140349	0.00807543	0.0822234	37377	0.575659	0.564846
mslnl	-0.0206258	0.0466344	0.658393	867	0.00652987	0.00712778	0.359612	37741	-0.575624	0.564869
gp2	-0.0226635	0.103264	0.826328	1011	0.0373476	0.0164591	0.0232658	43717	-0.573897	0.566038
crtap	-0.0231665	0.0574823	0.687035	867	0.0102026	0.00954354	0.285049	37741	-0.572671	0.566867
clec11a	0.0244242	0.0621459	0.69439	1044	-0.0115292	0.00911632	0.205992	45046	0.572407	0.567047
spesp1	0.0220641	0.0392538	0.574196	900	-0.000617878	0.00579893	0.915146	38800	0.571625	0.567576
lilra2	-0.02868	0.0432355	0.507257	1047	-0.00366975	0.0068267	0.590885	45114	-0.571387	0.567738
olfm4	-0.0843996	0.15925	0.596264	843	0.00759286	0.023707	0.748758	36556	-0.571366	0.567752
crybb1	-0.0498762	0.0742427	0.501885	900	-0.0068995	0.0125453	0.582344	38800	-0.570776	0.568152
chi3l1	0.0699016	0.104646	0.504297	1030	0.00957003	0.015148	0.527542	44123	0.570581	0.568284
cnp	-0.0575752	0.0911984	0.527998	878	-0.00482933	0.0154836	0.755119	37694	-0.570204	0.568539
gclm	-0.0353044	0.0610273	0.563077	865	-0.000158125	0.00881874	0.985694	37510	-0.569991	0.568684
gal	-0.0544828	0.0807665	0.500096	1053	-0.00794132	0.0126035	0.528639	45311	-0.569357	0.569114
tie1	0.0254302	0.0483119	0.598738	1064	-0.00243401	0.00790559	0.758171	45660	0.569186	0.56923
trim24	-0.0415605	0.0715786	0.56164	881	-0.000180801	0.0127531	0.988689	38041	-0.569139	0.569262
serpinf2	0.00662681	0.0162313	0.683171	886	-0.00272033	0.00262922	0.300838	38135	0.568463	0.569721
spink5	0.017561	0.0442107	0.691292	1047	-0.00783049	0.00638058	0.219739	45114	0.56844	0.569736
serpina5	-0.0237833	0.0379808	0.531352	884	-0.00190848	0.00621451	0.758768	38301	-0.568385	0.569774
bnip3l	-0.0296763	0.0526965	0.573477	859	0.000569219	0.00861477	0.947319	37668	-0.566438	0.571096
thpo	-0.0256097	0.0461609	0.579157	1030	0.000869295	0.00740044	0.906492	44275	-0.566393	0.571127
efna4	-0.035993	0.0504651	0.475867	1040	-0.00724779	0.00587756	0.217534	44682	-0.565781	0.571543
stip1	-0.0360897	0.076671	0.637947	1044	0.00757704	0.0127253	0.551558	45040	-0.561848	0.574219
clasp1	-0.0607403	0.0865102	0.482797	862	-0.0115715	0.0140563	0.410385	37377	-0.561001	0.574797
prss53	0.0252929	0.0429705	0.556272	895	0.000907336	0.00697213	0.896458	38704	0.56017	0.575364
sat1	0.0166038	0.055202	0.763653	865	-0.01477	0.00970423	0.128014	37510	0.559761	0.575643
fcrl1	-0.0389242	0.0591136	0.510385	1052	-0.00556239	0.00870585	0.522875	45128	-0.558344	0.576609
tf	0.0174441	0.0258233	0.499521	898	0.00284084	0.00415044	0.493684	38862	0.558343	0.57661
cntn5	-0.0339019	0.0501334	0.499041	1056	-0.00563957	0.00720916	0.434054	45208	-0.558003	0.576843
psmd1	0.0437081	0.0564615	0.439064	894	0.0118139	0.00954913	0.216033	38726	0.556976	0.577544
qpct	-0.0202655	0.0352536	0.565517	1057	-0.000441338	0.00506767	0.930601	45151	-0.556607	0.577796
st13	-0.0293985	0.068953	0.669954	880	0.00945483	0.0109354	0.38726	37950	-0.55652	0.577855
nos3	0.0416151	0.0694245	0.549019	1025	0.00257116	0.0103117	0.803097	44031	0.556292	0.578011
csnk1d	0.0360891	0.0725351	0.618937	859	-0.00480684	0.012348	0.697071	37668	0.555812	0.57834
dgkz	0.0203657	0.0397156	0.608209	1042	-0.00201704	0.00681854	0.767371	44249	0.555448	0.578588
csf1r	0.0206685	0.0496959	0.677584	900	-0.00726379	0.00772145	0.34685	38840	0.555399	0.578622
rabepk	0.0404796	0.0638792	0.526425	1028	0.0044416	0.0114049	0.696949	44017	0.555376	0.578638
tnfrsf10c	0.0317133	0.0609341	0.602858	1057	-0.00251211	0.00954783	0.792469	45226	0.554908	0.578957
selp	-0.0375221	0.0649859	0.563801	1053	-0.000996867	0.0109265	0.927307	45299	-0.554268	0.579395
ostn	-0.0289121	0.0438414	0.50977	867	-0.00424438	0.00789508	0.590858	37741	-0.553751	0.57975
sdc4	0.0330546	0.0601409	0.582698	1052	-0.000441716	0.00884834	0.960186	45128	0.551031	0.581612
cd163	0.022224	0.0521921	0.670333	1053	-0.0068729	0.00848762	0.418085	45299	0.550267	0.582136
itm2a	-0.0542171	0.0791588	0.493549	1050	-0.0102401	0.0114953	0.373036	45034	-0.549787	0.582466
jun	0.0425246	0.0662608	0.521161	1042	0.00571305	0.00971485	0.556485	44249	0.549678	0.58254
epha10	0.0230227	0.0787942	0.770202	1025	-0.0208225	0.0125096	0.0960155	44031	0.549569	0.582615
epha2	-0.0279982	0.0504582	0.579101	1013	-0.00013107	0.00591295	0.982315	43446	-0.548528	0.58333
nbn	0.0387564	0.0585383	0.508074	1042	0.00613727	0.0105028	0.558993	44249	0.54847	0.58337
rtbdn	-0.0311217	0.0390478	0.425625	1043	-0.00951561	0.0056644	0.0929842	44888	-0.547591	0.583973
mocs2	-0.0434367	0.0732894	0.553553	880	-0.00276503	0.0129488	0.830911	37950	-0.546482	0.584735
csf2rb	0.0324164	0.0519424	0.53274	859	0.00367664	0.0082676	0.656536	37668	0.546422	0.584776
tnfrsf11b	-0.0249843	0.0374329	0.504638	1051	-0.00432337	0.00563721	0.443124	45085	-0.545789	0.585211
saa4	0.0192309	0.0349535	0.582329	898	-0.000101722	0.00598705	0.986444	38862	0.545157	0.585645
lsm8	0.0263283	0.0951866	0.782155	884	-0.0262919	0.0166141	0.113542	38105	0.544578	0.586044
luzp2	-0.0262183	0.0515326	0.611038	893	0.00219974	0.00846099	0.794875	38610	-0.544172	0.586323
ccn5	0.0329892	0.0519846	0.525832	1047	0.00439218	0.00769848	0.568324	45114	0.54417	0.586325
xrcc4	0.0359921	0.0405909	0.375448	1025	0.0135894	0.00718273	0.0585034	44031	0.543471	0.586806
ube2l6	-0.0441559	0.0677492	0.514727	900	-0.00678112	0.011888	0.568398	38800	-0.543362	0.586881
fnta	-0.0176495	0.0375243	0.638223	893	0.00306131	0.00677749	0.651497	38610	-0.543141	0.587033
glo1	-0.0256421	0.0698453	0.7136	1030	0.0127925	0.0114276	0.262961	44275	-0.543061	0.587088
hnrnpul1	-0.0257948	0.0569043	0.650442	894	0.00548337	0.00964524	0.569695	38726	-0.541933	0.587865
nmt1	-0.0512082	0.0790686	0.517383	894	-0.0079196	0.0126438	0.531082	38726	-0.540613	0.588774
chac2	-0.0368831	0.0777264	0.635227	1028	0.00558036	0.0116114	0.630807	44017	-0.540324	0.588974
scgb3a1	0.0129205	0.0348787	0.711144	880	-0.00612037	0.00504894	0.22544	37950	0.540285	0.589
ppp1r14d	-0.0244295	0.043889	0.577928	894	-0.000437018	0.00728968	0.952196	38726	-0.539274	0.589698
tff1	-0.0736805	0.102384	0.471902	1036	-0.0179012	0.0148782	0.228913	44914	-0.539145	0.589787
pde4d	0.0364291	0.0683528	0.594201	865	-0.000961151	0.0118498	0.935354	37510	0.538979	0.589901
pfdn6	0.0478034	0.0802218	0.551405	867	0.00406795	0.0124738	0.744336	37741	0.538708	0.590089
c8b	0.0214945	0.0363596	0.55456	898	0.00170803	0.00577769	0.767517	38862	0.537446	0.59096
srp14	0.0503142	0.0698896	0.471743	1043	0.0122583	0.0118632	0.301464	44888	0.536835	0.591381
ces3	0.0424355	0.0879117	0.629406	1043	-0.00530653	0.013555	0.695443	44888	0.536725	0.591457
prdx1	-0.0634189	0.106017	0.549844	1015	-0.00578699	0.017331	0.738449	43840	-0.536489	0.591621
cope	-0.0406339	0.0560815	0.468894	1025	-0.0102202	0.00898261	0.255221	44031	-0.535487	0.592313
echdc3	0.0580188	0.089059	0.514914	900	0.00973329	0.0143473	0.497518	38800	0.535273	0.592461
mmp8	0.0701368	0.0946816	0.459001	1059	0.0189687	0.0143228	0.185388	45424	0.534344	0.593104
il1rn	0.0428927	0.0766824	0.576039	1049	0.00145746	0.0118239	0.901899	45023	0.534038	0.593315
gad2	-0.025232	0.0572594	0.65957	859	0.00563572	0.00889546	0.526378	37668	-0.532696	0.594244
cemip2	-0.0103113	0.0392491	0.792834	859	0.0108298	0.00640557	0.0909044	37668	-0.531607	0.594998
cabp2	-0.0403374	0.0752166	0.591901	867	0.000166787	0.0125971	0.989436	37741	-0.531103	0.595347
pcna	-0.0354434	0.0789537	0.653607	862	0.00693207	0.0122703	0.572113	37377	-0.530347	0.595871
hyou1	-0.0184495	0.0315438	0.55875	1064	-0.00161279	0.00421379	0.701913	45660	-0.529056	0.596767
apod	-0.0310905	0.054775	0.570453	862	-0.0017749	0.00841424	0.832936	37093	-0.528995	0.596809
pi16	-0.0195548	0.0313496	0.53294	900	-0.00279066	0.00465329	0.548698	38840	-0.528953	0.596838
bmper	0.0196504	0.0357591	0.582787	880	0.000670025	0.00439499	0.878831	37950	0.526821	0.598318
cntn4	-0.0165294	0.0318242	0.603594	1047	0.000401099	0.00457072	0.930073	45114	-0.526597	0.598473
cd22	-0.0233222	0.0567303	0.681078	1060	0.00684164	0.00811567	0.399224	45599	-0.526347	0.598647
dtnb	-0.0279924	0.055719	0.615522	889	0.00162612	0.00844001	0.84722	38535	-0.525574	0.599184
apbb1ip	0.0427806	0.0584328	0.464253	1043	0.0117759	0.00897957	0.189727	44888	0.524448	0.599967
ptx3	0.040127	0.0578768	0.488264	1050	0.00939872	0.0094577	0.320343	45034	0.523976	0.600295
ache	-0.0213296	0.043336	0.622708	880	0.0016198	0.00638948	0.799875	37950	-0.523905	0.600345
ccdc80	-0.028858	0.0492263	0.557847	1052	-0.00285258	0.0068777	0.678322	45128	-0.523201	0.600835
med21	-0.0268617	0.0567731	0.636233	865	0.00325551	0.00961819	0.735008	37510	-0.52303	0.600953
ankrd54	0.0350971	0.0700586	0.616502	1028	-0.00197282	0.0112229	0.860463	44017	0.522465	0.601346
chgb	-0.0362743	0.0576051	0.529024	1056	-0.00591241	0.00787465	0.452768	45355	-0.522213	0.601522
tymp	-0.0455318	0.0721804	0.528307	1046	-0.00730326	0.0128136	0.568706	44845	-0.521471	0.602039
khdc3l	-0.0365132	0.073452	0.619244	862	0.00235691	0.0128338	0.85429	37377	-0.521294	0.602162
gabarapl1	-0.0601915	0.0810946	0.458141	884	-0.0174709	0.0126494	0.167235	38105	-0.520505	0.602711
klk6	0.00688303	0.0411594	0.867223	1051	-0.014718	0.00584274	0.0117713	45167	0.519605	0.603339
cd28	0.0217484	0.047098	0.644346	1028	-0.00298194	0.00703805	0.671795	44017	0.519316	0.603541
ugdh	0.0456501	0.11394	0.688777	865	-0.0143388	0.019393	0.459679	37510	0.519032	0.603738
sftpd	0.0342351	0.0814395	0.674298	1052	-0.00850511	0.0127896	0.506053	45128	0.518455	0.604141
igfbp7	-0.0292448	0.049969	0.558499	1064	-0.00319815	0.0057199	0.576078	45660	-0.517874	0.604546
bpifb1	-0.0271537	0.0786168	0.729868	1055	0.0140683	0.0125923	0.263909	45010	-0.517742	0.604638
lrp2	-0.0142237	0.0421064	0.735593	867	0.00787364	0.00703811	0.263269	37741	-0.517617	0.604725
atp6v1g2	0.0160835	0.105882	0.879301	865	-0.039529	0.018629	0.0338518	37510	0.517285	0.604957
fcrl5	-0.0526652	0.0752939	0.48442	1047	-0.0133133	0.0110237	0.22717	45114	-0.51713	0.605066
sms	0.0182033	0.0686007	0.790802	867	-0.0178264	0.0123419	0.148638	37546	0.51691	0.605219
gpihbp1	0.0363703	0.0798797	0.648995	893	-0.00549683	0.013478	0.683395	38629	0.516822	0.60528
hcls1	-0.0268349	0.0629036	0.669756	1060	0.00612684	0.0107417	0.568423	45599	-0.516526	0.605487
pon2	0.0201877	0.0412111	0.624338	1030	-0.00135454	0.0067713	0.841449	44275	0.515812	0.605986
becn1	-0.0396746	0.0667613	0.552482	880	-0.00470036	0.011872	0.692166	37767	-0.515778	0.60601
fgf7	-0.0462597	0.09164	0.613831	862	0.0016079	0.0151668	0.915571	37377	-0.515333	0.60632
pafah2	-0.0378603	0.0564347	0.50248	884	-0.008447	0.00943101	0.370439	38105	-0.514062	0.607208
krt14	0.00446492	0.0299552	0.881542	994	-0.0111961	0.00559468	0.0453769	42654	0.513927	0.607303
c2	0.0170353	0.0270089	0.528357	1050	0.00299663	0.00454123	0.50934	45223	0.512582	0.608243
fcrlb	-0.0390934	0.0744975	0.599863	1028	-0.000448345	0.011668	0.969349	44017	-0.512495	0.608305
rac3	-0.0501977	0.0886975	0.57158	867	-0.00426928	0.0130349	0.743272	37741	-0.512307	0.608436
siglec7	-0.0254456	0.035609	0.475026	1052	-0.0070035	0.00551435	0.204073	45128	-0.511805	0.608787
rnase6	0.0235322	0.0539541	0.662832	888	-0.00423801	0.00591517	0.473708	38567	0.511636	0.608906
sdc1	-0.0382967	0.0546975	0.483986	1052	-0.0101147	0.00750417	0.177705	45128	-0.510453	0.609734
neb	-0.0199546	0.0486622	0.681862	865	0.00513532	0.00730693	0.482184	37510	-0.509877	0.610138
palm3	0.0498904	0.0880572	0.571155	865	0.00439282	0.0147228	0.765424	37510	0.509608	0.610326
palld	-0.0194923	0.0419707	0.642461	859	0.00224187	0.00763127	0.768932	37668	-0.509488	0.61041
ang	-0.0138893	0.0394877	0.725106	1048	0.00649601	0.0065665	0.322538	44994	-0.509252	0.610576
il1rap	-0.0348601	0.0536005	0.515597	1047	-0.00726208	0.0086804	0.402819	45114	-0.508262	0.61127
vat1	0.0138393	0.0246654	0.574862	1043	0.0011645	0.00378971	0.758633	44888	0.507911	0.611516
ctsz	-0.0183581	0.0408742	0.653425	1052	0.0026188	0.00618359	0.671927	45150	-0.507434	0.611851
cd38	0.0149167	0.0460953	0.746302	1043	-0.00867096	0.00606015	0.15249	44888	0.507349	0.61191
magea3	0.0237805	0.107814	0.825479	884	-0.0314627	0.0161078	0.0507969	38105	0.506768	0.612317
slc1a4	-0.0202639	0.0644381	0.75324	867	0.012634	0.00990369	0.202074	37741	-0.50461	0.613833
c1qa	-0.0092313	0.0283247	0.744558	1057	0.00522218	0.00431503	0.226197	45369	-0.504457	0.61394
gdnf	0.0228281	0.0476266	0.631817	1025	-0.00145819	0.00729871	0.841648	44031	0.504047	0.614228
sat2	-0.0268268	0.0769222	0.727359	884	0.0124815	0.0131238	0.341583	38105	-0.503735	0.614448
septin3	-0.0555945	0.0849111	0.512806	894	-0.0122204	0.0143879	0.39569	38726	-0.503639	0.614515
sap18	0.054349	0.0815002	0.505038	884	0.0127131	0.0140116	0.364239	38105	0.503482	0.614625
ecscr	-0.0489932	0.0635229	0.440759	867	-0.0166685	0.00986292	0.0910326	37546	-0.502842	0.615075
efhd1	0.0325844	0.0471295	0.489507	894	0.00866206	0.00664349	0.192295	38726	0.502619	0.615232
ephb6	0.00879058	0.0464768	0.850021	1038	-0.0147198	0.00597867	0.0138181	44691	0.501718	0.615866
hspa1a	-0.0259762	0.0797542	0.744714	1052	0.0145807	0.0138835	0.293624	45243	-0.50099	0.616378
apoa1	-0.0190803	0.035647	0.592606	898	-0.00105665	0.00524329	0.840289	38862	-0.500231	0.616912
fzd8	0.0225956	0.0531619	0.670918	867	-0.00429478	0.00819916	0.600416	37546	0.49991	0.617138
ralb	-0.0129207	0.0341421	0.705199	859	0.00436858	0.00573838	0.446488	37668	-0.499387	0.617507
hspg2	0.0217659	0.0434216	0.616288	1042	-6.97286e-05	0.00515597	0.98921	44773	0.499367	0.617521
ckmt1a_ckmt1b	-0.0043828	0.0841663	0.95848	1049	0.0380871	0.0129541	0.00328215	44946	-0.498723	0.617975
hsdl2	-0.030615	0.0578099	0.596537	880	-0.00144837	0.00914721	0.87419	37767	-0.498327	0.618254
gusb	-0.0275125	0.0773065	0.721995	1058	0.0113691	0.0123461	0.357124	45299	-0.49666	0.619429
smpd1	-0.0230456	0.0609893	0.705608	1055	0.00756668	0.00948453	0.424996	45281	-0.495968	0.619917
lrp2bp	0.0627247	0.103263	0.543729	867	0.0109899	0.0159435	0.490636	37741	0.495132	0.620507
csf2ra	-0.054504	0.0727731	0.454052	1041	-0.0180426	0.0117924	0.12602	44759	-0.494578	0.620898
aarsd1	0.0324027	0.0678476	0.633049	1043	-0.00154498	0.0108139	0.886394	44888	0.494116	0.621224
dusp13	-0.0239761	0.0502195	0.633177	893	0.00113979	0.00789567	0.88522	38610	-0.494053	0.621269
tnfrsf12a	-0.0296503	0.0532072	0.577468	1052	-0.00318146	0.00683943	0.641816	45247	-0.493408	0.621725
lgals4	0.0309959	0.0752348	0.680432	1051	-0.00644531	0.0105507	0.541275	45085	0.492836	0.622129
mdh1	-0.0147282	0.0451305	0.744239	891	0.00784632	0.0078452	0.317248	38631	-0.492815	0.622144
ppl	0.0238561	0.0403688	0.554708	859	0.00381882	0.00628904	0.54371	37668	0.490439	0.623823
anxa2	-0.0310993	0.08009	0.697887	862	0.00856075	0.013945	0.539288	37194	-0.487854	0.625653
lbp	-0.0180792	0.0715185	0.80048	1053	0.0172267	0.0113245	0.12822	45299	-0.487586	0.625843
igsf3	-0.022099	0.0507486	0.663319	1043	0.00288059	0.00709204	0.684618	44888	-0.487485	0.625915
igfbpl1	-0.0205203	0.0497459	0.680055	1052	0.00385027	0.00650043	0.553646	45128	-0.485772	0.627129
sox9	-0.0101969	0.0345401	0.767898	867	0.00675062	0.00514157	0.189208	37741	-0.485314	0.627453
cebpa	-0.00939596	0.0389951	0.80965	859	0.00985001	0.00732946	0.178991	37668	-0.485055	0.627637
crim1	-0.013105	0.0317967	0.680315	1053	0.00242221	0.00382877	0.526976	45311	-0.484824	0.627801
plxnb2	-0.0131871	0.0304939	0.665502	1062	0.00173949	0.00456885	0.703408	45435	-0.484092	0.628321
bmp6	0.0222146	0.0510454	0.663514	1030	-0.00273381	0.00786523	0.728156	44204	0.483049	0.629061
tmprss15	-0.0383834	0.112425	0.732861	1043	0.0165717	0.0175245	0.344344	44888	-0.482983	0.629108
spink4	-0.0438891	0.0913141	0.630874	1050	0.000585274	0.0122955	0.962035	45034	-0.482692	0.629314
tnxb	-0.0143212	0.0364724	0.694652	1047	0.0034343	0.00483071	0.477131	45114	-0.482606	0.629376
lonp1	-0.0822707	0.105422	0.435369	880	-0.0307933	0.0166482	0.064373	37767	-0.482323	0.629577
ism1	-0.0295714	0.0458311	0.518923	1050	-0.00717517	0.00762143	0.34648	45034	-0.482049	0.629771
dock9	0.0175828	0.136151	0.897276	867	-0.0488583	0.0227354	0.0316407	37546	0.48133	0.630282
cracr2a	-0.0238583	0.0922335	0.79594	1028	0.0212009	0.0167873	0.206626	44017	-0.480638	0.630774
slc27a4	-0.0363753	0.0775112	0.638962	1025	0.00134647	0.0128795	0.916738	44031	-0.480079	0.631171
pbxip1	-0.0190289	0.0383309	0.61971	893	-0.000428917	0.00577363	0.940781	38629	-0.479833	0.631346
ddx53	0.0216138	0.0392548	0.58205	867	0.00250599	0.00686766	0.71519	37741	0.47948	0.631597
cd2ap	-0.0280015	0.0742116	0.706012	1052	0.00804166	0.012569	0.522305	45128	-0.478861	0.632037
kiaa2013	-0.0451662	0.0625217	0.470233	893	-0.0148498	0.0106525	0.16332	38610	-0.478006	0.632646
ptn	-0.0318279	0.0605864	0.599467	1030	-0.00255525	0.00959063	0.789908	44275	-0.477213	0.63321
cep164	0.0308819	0.0809794	0.703018	1042	-0.00818813	0.0120729	0.497634	44249	0.477195	0.633223
adgrv1	0.0503478	0.0776064	0.516668	867	0.0128753	0.0133631	0.335306	37546	0.47585	0.634181
c1qbp	0.0320226	0.0869182	0.712646	894	-0.00979142	0.013	0.451341	38726	0.475781	0.63423
mapre3	-0.0943676	0.171705	0.582743	862	-0.0115841	0.0282261	0.681512	37377	-0.475741	0.634259
cptp	0.0259016	0.0439077	0.555407	865	0.00469636	0.00772692	0.543329	37510	0.47564	0.634331
brk1	-0.0263092	0.0555241	0.635719	1025	0.000371674	0.00855862	0.965362	44031	-0.474919	0.634844
ctsc	0.0307935	0.0543658	0.571235	1045	0.00467901	0.00835925	0.575659	45024	0.474769	0.634952
prss8	0.0173571	0.0570573	0.761032	1044	-0.00999719	0.00835502	0.231489	44952	0.474359	0.635244
otud6b	-0.0354158	0.0659535	0.591414	893	-0.00373955	0.0112826	0.740311	38629	-0.473405	0.635924
matn2	0.0230739	0.0406808	0.570705	1052	0.00363614	0.005642	0.519269	45160	0.47328	0.636013
setmar	0.0245547	0.0385798	0.524615	1038	0.00608123	0.00599818	0.310661	44614	0.473153	0.636104
nptn	-0.0572015	0.0955272	0.54944	1028	-0.0114065	0.0155733	0.463903	44017	-0.473146	0.636109
slitrk1	-0.0226544	0.0463925	0.625448	859	-0.000500459	0.00656726	0.939256	37668	-0.472819	0.636342
lrtm2	0.00974636	0.0353095	0.782592	894	-0.00708477	0.00517819	0.171259	38726	0.471629	0.637192
araf	-0.0499545	0.0718047	0.486801	884	-0.0155655	0.0129402	0.22903	38105	-0.471332	0.637403
ddx1	0.0372439	0.0644578	0.563543	893	0.00652986	0.00967481	0.499722	38629	0.471221	0.637483
id4	-0.0242645	0.0487239	0.618608	884	-0.000983203	0.00840833	0.906915	38105	-0.470862	0.637739
pcdh1	0.00635976	0.029195	0.827598	1057	-0.00750263	0.00400581	0.0610836	45452	0.470413	0.63806
sptbn2	-0.0314155	0.035552	0.377131	867	-0.0144491	0.00619375	0.0196613	37546	-0.470148	0.638249
ids	-0.00356122	0.0113412	0.753576	1060	0.00182386	0.00167433	0.276024	45599	-0.469735	0.638544
parp1	0.0286945	0.066073	0.664172	1050	-0.00277585	0.0112263	0.804705	45034	0.469567	0.638665
mmp1	0.0589087	0.105863	0.57802	1010	0.00861261	0.0175804	0.624208	43493	0.468686	0.639294
rbpms	-0.0356243	0.0719132	0.62046	859	-0.00150951	0.0128048	0.906159	37668	-0.467042	0.64047
gbp2	-0.0355667	0.0698791	0.610878	1042	-0.00252734	0.0114177	0.824819	44249	-0.46662	0.640772
pbld	0.0291493	0.0615387	0.635834	1025	7.22356e-05	0.00996243	0.994215	44031	0.466427	0.64091
podxl2	0.0109929	0.0379471	0.772111	1052	-0.0068796	0.00538607	0.201505	45247	0.46631	0.640993
stam	-0.0165405	0.0420157	0.693916	893	0.00333158	0.00722113	0.644539	38610	-0.466134	0.64112
bag3	0.0285521	0.0511825	0.577069	1040	0.0044261	0.00781721	0.571261	44682	0.465968	0.641239
ube2z	-0.0208468	0.0689769	0.762551	859	0.011686	0.011384	0.304648	37668	-0.465353	0.641679
tgfbr1	-0.00877234	0.0273883	0.748823	859	0.00411109	0.00416901	0.324088	37668	-0.465042	0.641902
calcb	0.0240141	0.0496997	0.629083	895	0.000661174	0.00746673	0.929441	38704	0.464666	0.64217
gas2	-0.0270179	0.0638692	0.672384	884	0.0030149	0.0100644	0.764515	38105	-0.464493	0.642295
iglc2	0.00378535	0.0349917	0.913878	897	-0.0125926	0.00466893	0.00699742	38791	0.463941	0.64269
mapt	-0.0150895	0.0605593	0.80328	1025	0.0133672	0.00998773	0.180785	44031	-0.463635	0.642909
cda	0.0486484	0.0569242	0.392993	895	0.0219078	0.00932173	0.018769	38729	0.463583	0.642946
boc	-0.0153167	0.0295915	0.604846	1030	-0.00144728	0.00450617	0.748078	44275	-0.463354	0.64311
serpind1	-0.0194301	0.040037	0.627581	897	-0.000710146	0.00560449	0.89917	38788	-0.463051	0.643328
mst1	-0.0138189	0.0711369	0.846019	885	0.0195641	0.0124586	0.116345	38251	-0.462243	0.643907
scg3	0.010186	0.0439429	0.816739	1052	-0.0103468	0.00650152	0.111519	45160	0.462227	0.643918
[truncated: 922 more rows]

## Sheet: Sup 7
Supplementary Table S7. Plasma proteomic analysis evaluating the interaction between rs6571678 (CFL2) and sex adjusting by age, stratifying by atrial fibrillation status.
protein	beta.af	se.af	pval.af	n.af	betanon.af	senon.af	pvalnon.af	nnon.af	Z_het	p_het
bloc1s2	-0.411121	0.0991275	3.69554e-05	867	-0.000422871	0.0154172	0.978118	37546	-4.09391	4.24152e-05
psmc3	-0.177458	0.0477404	0.000214572	862	-0.00538658	0.0063602	0.397045	37377	-3.57275	0.000353257
dusp13	-0.218439	0.0607699	0.000342875	893	-0.00130123	0.00859003	0.879597	38610	-3.53794	0.000403255
kitlg	-0.179434	0.0595928	0.00266631	1052	0.00628337	0.00780151	0.42059	45128	-3.09008	0.00200105
dsg4	-0.226574	0.0716877	0.00162059	1034	-0.00571001	0.0102919	0.579031	44751	-3.04965	0.00229107
vstm2b	-0.178164	0.0624844	0.00445552	884	0.00882725	0.00871219	0.310968	38105	-2.96394	0.00303729
kctd5	0.159173	0.0631844	0.011939	884	-0.0298912	0.00945162	0.00156516	37964	2.95934	0.00308299
kiaa1549l	-0.117027	0.0413413	0.00474994	884	0.00602493	0.00592671	0.309363	38105	-2.94636	0.00321542
serpina6	0.0664124	0.0222056	0.0028589	898	0.000238685	0.00356244	0.946582	38862	2.94242	0.00325653
spaca5_spaca5b	-0.119555	0.0406266	0.00333739	894	0.001217	0.00608006	0.841355	38726	-2.93999	0.00328223
zhx2	0.106376	0.0434711	0.0145956	895	-0.0219594	0.00721149	0.00232798	38704	2.91239	0.00358671
cgb3_cgb5_cgb8	-0.148082	0.0521222	0.00459856	900	0.00414085	0.00872811	0.635198	38840	-2.88039	0.00397181
rac3	0.334837	0.108034	0.00200225	867	0.0210497	0.0142001	0.138254	37741	2.87976	0.00397973
bhlhe40	-0.307529	0.0990852	0.0019737	867	-0.0210604	0.0147322	0.152856	37546	-2.85969	0.00424053
lgmn	0.146414	0.0499687	0.00346185	1053	0.00202292	0.00758682	0.789751	45311	2.85689	0.00427818
tpp1	0.18281	0.0657496	0.00552712	1045	-0.00636832	0.00966916	0.510142	44792	2.84664	0.00441828
marco	-0.098587	0.0365417	0.00708933	1052	0.00433671	0.00553579	0.433399	45128	-2.78484	0.00535547
tnpo1	-0.170331	0.0615757	0.0057902	884	-0.000667052	0.00729537	0.927147	38105	-2.73624	0.00621462
cdon	0.112254	0.0407502	0.00597651	1052	0.00126284	0.00557974	0.820949	45160	2.69853	0.00696473
mtus1	0.179877	0.0759331	0.0180566	884	-0.0273954	0.0117859	0.0201079	38105	2.69738	0.00698875
apobr	0.166438	0.0599264	0.00559724	880	0.00509919	0.008933	0.568121	37767	2.66286	0.00774802
nmt1	-0.246086	0.0958678	0.010423	894	0.0109151	0.01375	0.427302	38726	-2.65363	0.00796312
chad	-0.20407	0.0770348	0.00821689	880	0.00116204	0.0107286	0.913748	37950	-2.63869	0.0083228
dmp1	-0.230503	0.0840789	0.00624052	880	-0.00656291	0.0128252	0.608849	37767	-2.633	0.00846351
palld	-0.127996	0.0506435	0.0116704	859	0.00696426	0.00829986	0.401429	37668	-2.62983	0.00854267
kirrel2	-0.158972	0.0601874	0.0083854	1025	-0.0019695	0.00825303	0.811386	44031	-2.58438	0.00975531
setmar	0.112192	0.0458948	0.0146692	1038	-0.00753127	0.00651605	0.247768	44614	2.58276	0.00980147
igfl4	-0.2832	0.111132	0.0109979	859	0.0048848	0.0155576	0.753536	37668	-2.56726	0.0102507
unc5d	-0.0988148	0.0416118	0.017784	859	0.0084551	0.00559287	0.130603	37668	-2.5549	0.0106218
col4a1	0.176833	0.0724623	0.0148382	1052	-0.00860698	0.00833225	0.301623	45128	2.54237	0.0110103
klf4	0.135285	0.0574955	0.0188484	867	-0.0112722	0.00862515	0.191254	37546	2.52081	0.0117085
nadk	0.193654	0.0792019	0.0146465	1052	-0.00796797	0.0119422	0.504639	45128	2.51721	0.0118287
gage2a	-0.248008	0.10228	0.0155233	862	0.00985819	0.0131846	0.454644	37377	-2.50048	0.0124026
dlk1	-0.204068	0.0829205	0.0140136	1064	0.00431082	0.0116362	0.711037	45660	-2.48861	0.0128245
ttf2	-0.163402	0.068901	0.0179328	867	0.00954057	0.0102737	0.353083	37741	-2.48257	0.013044
tf	0.0770584	0.0313916	0.0142883	898	-0.00162231	0.00451853	0.719571	38862	2.48086	0.0131068
vstm2l	0.18242	0.0769077	0.0178795	1030	-0.0102461	0.0120756	0.396168	44275	2.47483	0.0133299
cd300c	-0.145272	0.0578332	0.0121564	1060	-0.0013163	0.00715151	0.853967	45500	-2.47033	0.0134988
btd	0.065413	0.0285705	0.0222811	898	-0.00486173	0.00437603	0.266578	38862	2.43134	0.015043
tcp11	-0.195851	0.0819908	0.0171183	884	0.00358876	0.0121787	0.768244	38105	-2.40607	0.0161251
evpl	-0.117199	0.0486765	0.0162582	884	0.00106739	0.00686757	0.876487	38105	-2.40581	0.0161367
gpha2	0.148028	0.0650714	0.0231526	893	-0.00968355	0.00969039	0.317659	38629	2.39723	0.0165196
nenf	-0.390655	0.157126	0.0130925	893	-0.0104538	0.023489	0.656286	38610	-2.39313	0.0167054
echdc3	0.221018	0.108367	0.0416901	900	-0.0407255	0.0155996	0.00903984	38800	2.3907	0.0168163
pglyrp4	0.205686	0.0840244	0.0145667	865	0.00246688	0.0129096	0.848457	37510	2.39053	0.0168243
pkd1	0.0841569	0.0398933	0.0351744	900	-0.0120608	0.0054369	0.0265384	38800	2.38978	0.0168583
col24a1	0.203866	0.0880052	0.0207566	893	-0.00692667	0.0113714	0.542442	38629	2.37548	0.0175261
timp3	0.447444	0.185391	0.0159704	1053	0.00334495	0.0274072	0.902863	45311	2.36971	0.0178019
cdh17	0.237986	0.101714	0.0194839	1052	-0.00332301	0.0139183	0.811299	45128	2.35051	0.0187475
sil1	0.0950507	0.0449981	0.0349414	880	-0.0116832	0.00682487	0.0869318	37767	2.34514	0.0190198
fabp9	-0.180268	0.0789447	0.0226029	1050	0.00666751	0.0115565	0.563976	45034	-2.34295	0.0191317
glt8d2	0.141807	0.0640299	0.0270017	1025	-0.00973339	0.00977191	0.319227	44031	2.33961	0.0193036
tgfbr3	-0.112506	0.05032	0.0255715	1064	0.00553567	0.00653458	0.396924	45660	-2.32629	0.0200029
vwf	0.237522	0.102638	0.0208492	1064	-0.00350785	0.0152942	0.818592	45660	2.3227	0.0201954
alpi	0.409084	0.176278	0.0205391	859	-0.00420618	0.0255474	0.869227	37668	2.3203	0.0203249
pqbp1	0.16182	0.0749093	0.0309878	1028	-0.0141962	0.0120076	0.237107	44017	2.32011	0.0203351
mog	-0.135218	0.0546848	0.0135674	1060	-0.007501	0.0069611	0.281236	45479	-2.31681	0.0205141
vgf	-0.120296	0.0515228	0.019775	894	-0.00135721	0.00634013	0.830497	38726	-2.29119	0.0219525
stam	0.112096	0.0511193	0.0285789	893	-0.00638608	0.00785628	0.416302	38610	2.29085	0.021972
scly	0.128342	0.0661072	0.0524751	1055	-0.0247487	0.0102742	0.0160085	45346	2.28832	0.0221191
hla_a	-0.115771	0.0466483	0.0132562	894	-0.00819275	0.00676812	0.226097	38726	-2.28226	0.0224737
nell1	0.12596	0.0648803	0.0524747	1052	-0.0230687	0.00873047	0.0082369	45247	2.27647	0.0228181
col4a4	-0.157829	0.076092	0.0383538	882	0.0157999	0.0109326	0.148404	38039	-2.25863	0.0239064
cxcl13	0.205649	0.0921969	0.025921	1060	-0.00431599	0.0127436	0.734852	45500	2.25591	0.0240763
arhgef5	0.252079	0.108807	0.020751	867	0.00419227	0.0154879	0.786638	37546	2.25549	0.0241029
egln1	0.183551	0.0807852	0.0232835	1050	-8.26143e-05	0.0119637	0.99449	45034	2.24859	0.0245385
susd4	-0.147322	0.0598071	0.0139554	893	-0.0115547	0.00873469	0.185891	38610	-2.24626	0.0246872
il2rg	-0.121298	0.054003	0.0249405	893	0.00103234	0.00774923	0.894022	38610	-2.24228	0.0249431
rgmb	-0.0990946	0.0457611	0.0305748	1060	0.00384709	0.00547143	0.481983	45500	-2.23364	0.0255071
srp14	0.154668	0.0832284	0.0634018	1043	-0.0332821	0.0129132	0.00995879	44888	2.23154	0.0256452
brd1	-0.0979445	0.0440736	0.0265172	884	0.00120875	0.00641919	0.85064	38105	-2.22623	0.0259986
grn	0.069628	0.0357818	0.0519356	1042	-0.0108349	0.00510883	0.0339423	44899	2.22614	0.0260049
akap12	-0.0768462	0.036639	0.0362456	880	0.00529087	0.00442843	0.232192	37950	-2.2256	0.0260412
spint3	0.430692	0.20758	0.0382902	893	-0.035821	0.0306161	0.242006	38629	2.22334	0.026193
mme	0.239901	0.120282	0.0463586	1043	-0.0287867	0.0170285	0.0909386	44888	2.21177	0.0269824
gusb	0.196726	0.0920631	0.0328395	1058	-0.00793499	0.0134202	0.554341	45299	2.1998	0.0278212
pcdh12	-0.0891862	0.0379302	0.0189241	894	-0.00499728	0.00524044	0.340292	38726	-2.19869	0.0278999
coro6	-0.117039	0.0487527	0.0165759	867	-0.00915825	0.00778121	0.239215	37546	-2.18517	0.0288766
ace2	0.171012	0.086115	0.0473153	1030	-0.0177294	0.0109402	0.105115	44275	2.17426	0.0296855
snx2	-0.248946	0.118362	0.0357242	893	0.0104791	0.0169837	0.53723	38610	-2.16957	0.0300394
gcnt1	-0.110236	0.0503411	0.0287618	1043	-0.00153909	0.00720442	0.830835	44888	-2.13743	0.0325627
hrg	0.0956983	0.0461754	0.0385082	890	-0.00332068	0.00654461	0.611883	38650	2.12319	0.0337378
thbs4	0.130876	0.0731954	0.0740586	1050	-0.0249799	0.00976423	0.0105216	45141	2.11062	0.0348047
eloa	0.141185	0.0776488	0.0693131	1043	-0.0234363	0.0116175	0.0436671	44888	2.09674	0.0360164
sele	0.157965	0.0745676	0.0343727	1064	0.000120091	0.0109701	0.991266	45660	2.09426	0.036237
adam22	-0.130359	0.0584213	0.0258706	1041	-0.00708869	0.00733817	0.334048	44759	-2.09357	0.0362981
cdh3	-0.129743	0.0620706	0.0368348	1060	0.00044343	0.00736919	0.952018	45500	-2.08276	0.037273
vamp5	0.183951	0.0856521	0.031975	1030	0.00450772	0.0112569	0.688833	44275	2.07717	0.0377863
ptn	0.138336	0.0729231	0.0581066	1030	-0.014145	0.0104078	0.174132	44275	2.07001	0.0384513
spesp1	-0.102578	0.0478017	0.032149	900	-0.0028701	0.00630569	0.648996	38800	-2.06795	0.038645
arhgap30	-0.116176	0.0548388	0.0344128	884	-0.00169845	0.00827642	0.837405	38105	-2.06415	0.0390034
smndc1	0.168995	0.086672	0.0515113	893	-0.0116294	0.0132398	0.379752	38629	2.0601	0.0393885
zp3	0.719187	0.385692	0.0625626	880	-0.0832732	0.0550776	0.130561	37767	2.05968	0.0394293
tcof1	0.080443	0.0430353	0.0619169	900	-0.0091096	0.00670697	0.174399	38800	2.05609	0.0397739
cfc1	-0.147132	0.076713	0.0553943	1028	0.0118768	0.0098051	0.22579	44017	-2.05605	0.0397773
ube2b	-0.0871676	0.0437881	0.0468232	893	0.00302788	0.00607782	0.618356	38610	-2.04026	0.0413244
adgrf5	0.0775718	0.0380065	0.0415424	900	-0.000827346	0.00591928	0.888841	38800	2.03821	0.0415289
ccl17	0.26747	0.138791	0.0542331	1050	-0.016911	0.019168	0.377646	45014	2.02972	0.0423852
morf4l1	-0.0777182	0.0493897	0.115946	884	0.0239462	0.00843164	0.00451322	38105	-2.02906	0.0424524
acy1	0.153603	0.0869054	0.0774407	1052	-0.0226405	0.0135757	0.0953779	45128	2.00369	0.0451034
cd300a	-0.107501	0.0507831	0.0345526	880	-0.00525939	0.00631171	0.404695	37950	-1.99793	0.0457241
serpinc1	0.0434153	0.0220396	0.0491613	897	-0.00103105	0.00309105	0.738714	38788	1.99711	0.0458128
cxcl10	0.160846	0.095041	0.0908695	1053	-0.0309208	0.0140518	0.0277775	45311	1.99603	0.0459306
cytl1	-0.0851999	0.0442975	0.0547535	897	0.00374505	0.00498599	0.452588	38800	-1.9953	0.0460103
angpt2	0.166558	0.0826887	0.0442345	1060	0.00148732	0.00787996	0.850292	45479	1.98728	0.0468912
pydc1	-0.110893	0.0634667	0.0809416	880	0.0163786	0.00861978	0.0574253	37767	-1.98709	0.0469123
cope	0.131266	0.0670936	0.0506834	1025	-0.00342805	0.00976758	0.725618	44031	1.98661	0.0469652
fbp1	0.171869	0.10381	0.0980997	1052	-0.0365669	0.015564	0.0188053	45128	1.98567	0.04707
epgn	0.138797	0.0734426	0.0591012	893	-0.00818717	0.00975295	0.401219	38610	1.98393	0.0472639
b3gnt7	0.105333	0.0557682	0.059254	880	-0.00620577	0.0076435	0.416853	37767	1.98152	0.0475334
pafah1b3	-0.316457	0.161104	0.0498061	894	0.00570015	0.0247658	0.817967	38726	-1.97647	0.0481018
cuzd1	-0.117839	0.056218	0.0363639	867	-0.00578263	0.00764226	0.449255	37741	-1.97508	0.0482592
blnk	0.0996375	0.051911	0.0552675	859	-0.0040708	0.00823205	0.620951	37668	1.97316	0.0484778
folr2	-0.0993248	0.0464462	0.032706	1060	-0.00690416	0.00616733	0.262945	45500	-1.97253	0.0485492
gc	0.0691499	0.0366653	0.0596228	898	-0.00393446	0.00540001	0.466249	38862	1.97201	0.0486086
cacna1h	0.165062	0.0781558	0.0349776	865	0.00912452	0.0120636	0.449433	37510	1.97186	0.0486254
rad51	-0.134583	0.0703271	0.055986	884	0.0052779	0.011248	0.638907	38105	-1.96377	0.0495572
flt3lg	0.104499	0.0489107	0.0328653	1060	0.00750244	0.00706011	0.287946	45599	1.9628	0.0496691
armcx2	-0.147526	0.0784003	0.0602139	867	0.00838494	0.0130554	0.520711	37546	-1.96164	0.049805
serping1	0.0572636	0.0265434	0.0312446	897	0.00464492	0.00394509	0.239047	38788	1.96082	0.0498999
dsc2	-0.110689	0.0593083	0.0622785	1035	0.00635279	0.00705365	0.367785	44602	-1.95964	0.0500379
nudt2	0.127929	0.07355	0.0822709	1043	-0.0180534	0.0118411	0.127358	44888	1.95957	0.0500464
pbld	-0.157798	0.0735423	0.0321338	1025	-0.0123334	0.0108327	0.254904	44031	-1.95686	0.0503636
nbn	0.123903	0.0701056	0.0774595	1042	-0.0146892	0.0114348	0.198936	44249	1.95112	0.0510427
gh1	0.454711	0.25177	0.0711975	1049	-0.0412953	0.0377214	0.273635	45058	1.94833	0.0513756
treml2	-0.100218	0.0542732	0.0650975	1047	0.00625108	0.00704213	0.374724	45114	-1.94541	0.0517258
fabp2	0.243223	0.120791	0.0443086	1052	0.00610731	0.0164502	0.710445	45128	1.94507	0.0517666
clul1	0.108467	0.0631194	0.0860109	1050	-0.0156091	0.00949181	0.100084	45054	1.94389	0.0519091
crybb2	0.212617	0.104733	0.0426459	895	0.00751201	0.0138167	0.586659	38704	1.94153	0.0521942
hexim1	0.196403	0.1108	0.0765896	1050	-0.021044	0.01725	0.222493	45034	1.93915	0.0524834
cxcl3	0.259952	0.136262	0.0566989	1051	-0.00685088	0.0197122	0.728183	45089	1.93784	0.0526426
tmed10	0.131429	0.0642282	0.0410319	865	0.0054177	0.0103703	0.601377	37510	1.93685	0.0527635
creb3	0.146798	0.0763783	0.0549392	862	-0.00276355	0.0116274	0.812134	37377	1.93586	0.0528847
lelp1	0.177319	0.0996526	0.0755312	867	-0.0162575	0.0152472	0.286313	37546	1.92017	0.0548367
paip2b	-0.139323	0.0741127	0.0604653	859	0.00446573	0.0111115	0.687759	37316	-1.91869	0.055024
fgl1	0.180258	0.100878	0.0742938	900	-0.0143975	0.013327	0.280006	38840	1.91299	0.0557495
ruvbl1	0.230805	0.137859	0.0943935	1028	-0.034448	0.0215025	0.109153	44017	1.90111	0.0572876
afap1	0.207359	0.108338	0.0559464	880	-0.00129995	0.0177478	0.941611	37950	1.90066	0.0573463
icam5	0.124725	0.0705497	0.0773684	1052	-0.0103997	0.00957025	0.27719	45128	1.89793	0.0577054
cela3a	-0.17676	0.0891902	0.0477564	1063	-0.00681318	0.0117988	0.563641	45589	-1.88899	0.0588937
slitrk1	-0.113823	0.0561166	0.0428361	859	-0.00710943	0.00714301	0.319597	37668	-1.88642	0.059238
draxin	-0.122224	0.0648186	0.0596243	1041	0.000997547	0.0089085	0.910842	44759	-1.88332	0.0596574
il13ra2	-0.0769306	0.0410742	0.0614116	867	0.00116713	0.00597735	0.845191	37546	-1.88156	0.0598958
hmox2	0.101893	0.0591771	0.0854037	1025	-0.0107219	0.00978466	0.273177	44031	1.87752	0.0604468
apex1	0.137976	0.0825155	0.0947991	1055	-0.0184873	0.0125009	0.139179	45339	1.87477	0.0608241
flt3	-0.104052	0.0509078	0.0412162	1028	-0.00794301	0.00637358	0.212683	44017	-1.87328	0.0610301
padi4	0.166699	0.108398	0.124399	1024	-0.0377421	0.01569	0.0161551	43958	1.86656	0.0619624
prkra	0.152623	0.0924028	0.0989001	1028	-0.0210621	0.0142026	0.138089	44017	1.85783	0.0631928
aida	-0.223023	0.116733	0.0563949	867	-0.00398548	0.0180246	0.825006	37741	-1.85442	0.0636784
anpep	0.0773529	0.0446784	0.083688	1052	-0.00608037	0.00579438	0.29402	45228	1.85191	0.0640388
psca	0.714213	0.365722	0.0511469	893	0.0300229	0.053746	0.576433	38629	1.85091	0.064182
col5a1	0.108398	0.0675866	0.109111	880	-0.0174454	0.00822478	0.0339217	37950	1.84832	0.0645557
ikzf2	-0.218278	0.137173	0.11186	1028	0.0373353	0.0192982	0.0530399	44017	-1.84527	0.0649989
slc34a3	-0.103495	0.0613622	0.0920395	862	0.0111234	0.0101833	0.274704	37377	-1.8427	0.0653734
nfatc3	0.155598	0.0861282	0.0711176	1042	-0.00475296	0.0126147	0.706339	44249	1.84211	0.0654589
ggh	-0.096882	0.0526801	0.0661949	1030	0.00102266	0.00752529	0.891904	44344	-1.8398	0.0657975
atxn10	-0.205202	0.101202	0.0428552	1025	-0.0170825	0.0151182	0.258512	44031	-1.83846	0.0659951
c1qtnf1	0.129371	0.0692434	0.0619925	1053	0.0013433	0.00888957	0.87989	45299	1.8339	0.0666693
ret	0.103589	0.0610972	0.0902858	1043	-0.00949488	0.00843399	0.260262	44888	1.83349	0.0667296
mrc1	-0.0813338	0.0453165	0.0730242	900	0.00250803	0.0061273	0.682307	38840	-1.83345	0.0667352
s100a11	0.126738	0.06496	0.051325	1042	0.00635866	0.0101017	0.529047	44770	1.83112	0.0670834
cox6b1	-0.074718	0.0464407	0.107993	900	0.0110539	0.0067627	0.102152	38800	-1.82764	0.0676042
muc16	0.492734	0.272648	0.0710177	1043	-0.00994721	0.0391546	0.799459	44888	1.82498	0.0680041
baiap2	0.174234	0.0958127	0.0692826	1028	-0.0022758	0.0137351	0.8684	44017	1.82359	0.0682136
cpb1	-0.174453	0.0921921	0.0587269	1064	-0.00534638	0.0120498	0.657269	45660	-1.81881	0.0689399
dctpp1	0.0807563	0.0464212	0.0822156	1052	-0.00428362	0.00655182	0.51324	45128	1.81394	0.0696867
aif1	0.127975	0.0703612	0.0692293	1028	-0.00118673	0.0110269	0.914297	44017	1.81356	0.0697451
ltbp2	0.0913711	0.0571819	0.110363	1064	-0.0129955	0.00648212	0.0449871	45660	1.81355	0.0697466
cst5	-0.154194	0.0819199	0.060084	1032	-0.00460685	0.0114527	0.687502	44248	-1.80843	0.0705395
fst	0.133538	0.0698565	0.0561997	1053	0.00594761	0.0105251	0.572017	45235	1.80608	0.0709062
adamts16	0.101186	0.0523572	0.0535596	1030	0.00593318	0.00665467	0.372622	44275	1.80477	0.0711109
tfap2a	-0.150533	0.0861591	0.0809663	867	0.00613981	0.0124501	0.621908	37546	-1.79972	0.0719041
serpina11	0.106195	0.0604132	0.0790696	1064	-0.00338569	0.00851	0.690744	45660	1.79612	0.0724762
dda1	0.0956562	0.0543092	0.0785388	865	-0.00300734	0.0083623	0.719126	37510	1.79554	0.0725679
mansc1	-0.0847927	0.0462048	0.0667674	1052	-0.00123051	0.00566315	0.827989	45247	-1.79508	0.0726406
htr1b	-0.114198	0.0593217	0.054551	867	-0.00683095	0.00906746	0.451246	37546	-1.78913	0.0735945
tpsg1	-0.0722236	0.0464096	0.120026	859	0.0113311	0.00560013	0.0430427	37668	-1.78741	0.0738713
mmp7	0.117706	0.0739201	0.111618	1027	-0.0156195	0.0102403	0.127193	44203	1.78658	0.0740058
nptx2	0.0969099	0.0494009	0.0501076	897	0.00788626	0.00689958	0.253043	38800	1.78474	0.074303
lilra2	-0.0948624	0.0512399	0.0644038	1047	-0.00257822	0.00743033	0.728604	45114	-1.78238	0.0746876
mycbp2	0.156005	0.0899129	0.0830749	894	-0.00604751	0.0140177	0.666167	38726	1.78082	0.0749422
hspa1a	0.167261	0.0957414	0.0809289	1052	-0.0049312	0.0151014	0.744018	45243	1.77655	0.0756421
ceacam1	0.0519678	0.0322706	0.107618	1050	-0.00574005	0.00421334	0.173094	45172	1.7732	0.0761957
mrpl24	-0.0662935	0.0449405	0.140541	865	0.0146094	0.00821383	0.0753082	37510	-1.77089	0.0765798
cbx2	-0.108483	0.0525061	0.0391175	865	-0.0145218	0.00833492	0.0814667	37510	-1.7674	0.077161
tpsd1	-0.0976226	0.0557459	0.0802554	894	0.00167963	0.00768896	0.827082	38726	-1.76463	0.0776261
ttr	0.0818665	0.0416801	0.0498249	887	0.00808843	0.00521162	0.120671	38440	1.75643	0.0790157
art3	-0.0978889	0.0570971	0.0867454	1053	0.00313557	0.00710186	0.658843	45299	-1.75582	0.0791197
txn	-0.116005	0.0627337	0.06477	885	-0.00482635	0.00932057	0.604589	38186	-1.75298	0.0796049
caly	-0.103065	0.0597566	0.0849307	865	0.00246616	0.0078006	0.751891	37510	-1.75117	0.0799169
nop56	-0.324908	0.163686	0.0474671	865	-0.0354474	0.0231623	0.125929	37510	-1.75095	0.0799543
c7	0.0862328	0.0558231	0.122767	882	-0.0121711	0.00661676	0.0658592	37932	1.75053	0.0800274
ptx3	0.0999415	0.0691541	0.148701	1050	-0.0223463	0.0102671	0.0295234	45034	1.74917	0.0802623
fcrl6	-0.178605	0.106169	0.0928173	1050	0.00858936	0.0141425	0.543625	45034	-1.74772	0.0805118
blmh	0.0816585	0.0450641	0.0702611	1064	0.00215147	0.00665144	0.746349	45660	1.7454	0.0809151
rgma	-0.0886515	0.0483603	0.0670625	1060	-0.00356065	0.00654071	0.586181	45500	-1.74364	0.0812213
hip1r	0.0843245	0.0665333	0.205342	895	-0.0327135	0.00934279	0.000463224	38625	1.742	0.0815086
acy3	0.109377	0.079304	0.168189	865	-0.0299428	0.0115097	0.0092847	37510	1.73856	0.0821117
gad2	-0.111887	0.0693468	0.107019	859	0.00980653	0.0096752	0.310793	37668	-1.73802	0.082208
fen1	0.134417	0.0892694	0.132441	1028	-0.0223771	0.0137906	0.104674	44017	1.73583	0.0825946
ephx2	-0.147915	0.0787336	0.0605727	1030	-0.00967441	0.0128912	0.452979	44275	-1.73273	0.0831444
rpgr	-0.0957474	0.0602009	0.112097	867	0.00957113	0.00850554	0.260477	37741	-1.73225	0.0832295
dpp6	0.0715327	0.0518142	0.167711	1043	-0.0189349	0.00716524	0.0082301	44888	1.72954	0.0837121
galnt3	-0.12161	0.0617879	0.0493129	1042	-0.0140352	0.00883375	0.11211	44249	-1.72351	0.0847966
arl13b	-0.170824	0.0939594	0.0694026	865	-0.00731387	0.014638	0.617324	37510	-1.71948	0.0855273
fgf2	0.163047	0.0933833	0.0811056	1050	0.000847722	0.0141151	0.95211	45034	1.71741	0.0859043
heg1	0.0656599	0.0401342	0.102197	880	-0.0039752	0.00577077	0.490921	37950	1.71739	0.0859071
timp2	0.0745209	0.0448008	0.0965862	900	-0.00279022	0.00530166	0.598688	38800	1.7137	0.0865831
agbl2	-0.259741	0.129559	0.0452965	867	-0.0359909	0.0189294	0.0572674	37546	-1.70886	0.0874762
gpc1	-0.084836	0.0448567	0.0588627	1060	-0.0075974	0.00608278	0.211671	45479	-1.70628	0.0879563
zbp1	0.098237	0.0567418	0.0837597	859	0.000357823	0.00865263	0.967014	37668	1.70528	0.0881424
ccl19	0.302004	0.177934	0.0899389	1060	-0.00382009	0.0254087	0.880493	45500	1.70149	0.0888515
kel	0.0833672	0.0534082	0.118847	1025	-0.00834072	0.00752182	0.267492	44031	1.70033	0.0890685
rbp2	0.202262	0.119758	0.0915344	1043	-0.00305836	0.0161915	0.850182	44888	1.699	0.0893185
fcer2	-0.141271	0.0827626	0.088131	1047	0.00035957	0.0107118	0.973222	45114	-1.69713	0.0896722
mrpl28	0.091971	0.0608216	0.130853	894	-0.0119223	0.00773849	0.123412	38726	1.6945	0.0901696
fam171a2	0.345058	0.232614	0.138325	894	-0.0529894	0.0328222	0.106441	38726	1.69441	0.0901879
ncf2	0.209612	0.12865	0.103547	1049	-0.0104105	0.0181339	0.565911	44959	1.6935	0.0903607
fabp1	0.220186	0.151994	0.147736	1051	-0.039458	0.0204323	0.0534696	45085	1.69302	0.0904516
tnfrsf19	-0.0979753	0.0611864	0.109619	1060	0.00608758	0.00648683	0.348017	45479	-1.69127	0.0907846
fgf23	-0.173872	0.111699	0.119862	1059	0.0151565	0.011752	0.197162	45410	-1.68302	0.0923718
clmp	-0.0604336	0.0389355	0.120928	1060	0.00541244	0.0047124	0.250746	45479	-1.6789	0.093171
klkb1	0.0624088	0.035414	0.0783732	882	0.00234276	0.00523272	0.654362	38078	1.67789	0.0933682
eng	0.0433048	0.0281262	0.123941	1064	-0.00418235	0.00356875	0.241228	45660	1.67493	0.0939474
fcgr3b	-0.110616	0.0681998	0.105118	1049	0.00476515	0.010234	0.641491	45161	-1.67308	0.0943119
cd276	0.0814206	0.0582946	0.162797	1051	-0.0168592	0.00734866	0.0217842	45085	1.67268	0.0943908
fmr1	0.067586	0.0470708	0.151354	1028	-0.0120642	0.00736483	0.101412	44017	1.6718	0.0945642
mapk9	0.0833365	0.0554042	0.132844	1050	-0.010486	0.00903801	0.245968	45034	1.67133	0.0946573
stxbp3	0.0815331	0.0593203	0.169602	1028	-0.0185012	0.00912594	0.0426359	44017	1.66673	0.0955676
mepe	-0.0656772	0.038163	0.0855528	1051	-0.00176669	0.00520055	0.734076	45085	-1.65934	0.0970481
spock1	0.0672996	0.043327	0.120658	1041	-0.00496232	0.00531755	0.350724	44759	1.65541	0.0978423
rpe	-0.150246	0.0976814	0.124378	884	0.0133223	0.014908	0.371522	38105	-1.65534	0.097855
clec12a	-0.0512812	0.0330798	0.121457	859	0.00391597	0.00424368	0.35613	37668	-1.65504	0.0979155
cd300e	-0.123597	0.0737859	0.0942171	1058	-0.000668601	0.00875132	0.939101	45332	-1.65441	0.0980433
bach1	0.141149	0.0986044	0.152596	1050	-0.0239686	0.0155554	0.123359	45034	1.65409	0.09811
ptprn2	-0.0987327	0.057014	0.0836212	1037	-0.00396966	0.00687735	0.563802	44611	-1.65014	0.0989146
plg	0.0567545	0.0318353	0.0749731	879	0.00370387	0.00469656	0.43033	37884	1.64857	0.0992363
cd82	-0.103345	0.0598875	0.0847612	884	-0.00360958	0.0086182	0.675341	38105	-1.6484	0.0992706
dscam	-0.0921128	0.0517846	0.0756196	894	-0.00616454	0.0074128	0.405636	38726	-1.64298	0.100388
csf1r	-0.110858	0.0602623	0.0661584	900	-0.0109515	0.00840337	0.192506	38840	-1.64198	0.100594
f7	-0.108524	0.0676098	0.108763	1051	0.0029016	0.00627078	0.64357	45227	-1.64102	0.100793
tp53inp1	-0.080904	0.0466499	0.0831693	1030	-0.00364797	0.00658675	0.579695	44275	-1.63981	0.101044
nid2	0.177707	0.104093	0.0880839	1047	0.00519091	0.0154555	0.736976	45114	1.63935	0.101139
acp5	0.0686698	0.0486232	0.158162	1058	-0.011746	0.00682424	0.0852186	45299	1.6378	0.101463
ccl28	0.134615	0.0821224	0.101474	1047	-0.00121663	0.0121799	0.920434	44881	1.63612	0.101815
cdnf	-0.0838277	0.0522211	0.108744	1043	0.0022106	0.00672175	0.742254	44888	-1.63409	0.102239
igdcc4	0.0672353	0.0416067	0.106454	897	-0.00129925	0.00546213	0.811987	38800	1.63319	0.10243
mansc4	-0.14987	0.107397	0.163233	865	0.0266224	0.0138005	0.0537277	37510	-1.62996	0.10311
gast	0.36615	0.235301	0.120041	895	-0.0192355	0.0268164	0.473191	38704	1.62731	0.103671
crym	0.172056	0.0962976	0.0743358	867	0.0132937	0.0157221	0.397812	37546	1.62712	0.103712
lbr	0.131774	0.0966008	0.172825	1060	-0.0269	0.014557	0.0646219	45500	1.62424	0.104326
acp1	-0.0900813	0.065751	0.171036	859	0.0176862	0.00945108	0.0613056	37668	-1.62235	0.104729
cxcl5	0.268115	0.162833	0.0999487	1047	0.00136707	0.0236567	0.953918	44976	1.62115	0.104985
cd83	-0.098841	0.055263	0.0739758	1050	-0.00852429	0.0073072	0.243394	45034	-1.62021	0.105188
ube2z	-0.127058	0.0835733	0.1288	859	0.00955606	0.0123817	0.440245	37668	-1.61702	0.105875
nlgn2	-0.105267	0.0649746	0.10557	867	0.000956997	0.00994031	0.923303	37546	-1.61606	0.106082
bap18	0.119156	0.0941636	0.206053	895	-0.03466	0.0146536	0.0180213	38704	1.61407	0.106512
ifngr1	-0.0577149	0.0362075	0.111237	1053	0.00109917	0.00426705	0.79672	45311	-1.6132	0.106701
tnni3	0.228323	0.123197	0.0641253	1030	0.0276367	0.0175011	0.114312	44275	1.61279	0.10679
erbb3	0.046053	0.0269005	0.0871979	1049	0.00220379	0.00407471	0.588617	44946	1.61167	0.107034
optc	-0.117033	0.0653718	0.0737023	1043	-0.0106246	0.00958512	0.267677	44888	-1.61052	0.107284
frmd7	-0.0768056	0.0455273	0.0919609	867	-0.00270425	0.00687918	0.694244	37741	-1.60936	0.107539
sftpa2	0.133597	0.0822775	0.10474	1028	0.000103446	0.0110645	0.99254	44017	1.608	0.107834
cd300lf	-0.149313	0.0959267	0.119881	1060	0.00596738	0.0122053	0.624902	45479	-1.6058	0.108319
nrn1	-0.0683788	0.0501143	0.172768	894	0.0128057	0.00740802	0.0838826	38726	-1.60258	0.109028
serpina3	0.0384559	0.0233854	0.10044	892	0.000650343	0.00311087	0.834406	38720	1.60251	0.109042
fcrl1	-0.1157	0.070373	0.100456	1052	-0.00193118	0.00945859	0.83822	45128	-1.60225	0.109101
sost	-0.0901802	0.0596227	0.130706	1049	0.00622982	0.00815289	0.444797	45058	-1.60209	0.109135
crtap	-0.108345	0.0704551	0.124467	867	0.00563044	0.0103966	0.588122	37741	-1.60038	0.109515
nid1	0.0844187	0.0525541	0.108506	1050	-0.000629564	0.00794313	0.936827	45141	1.60013	0.109571
notch3	0.0760643	0.0563874	0.177639	1064	-0.014754	0.00702285	0.035659	45660	1.59826	0.109984
gabarap	-0.122395	0.0691799	0.0771983	893	-0.0106853	0.0101103	0.290575	38610	-1.5978	0.110087
hcg22	-0.12075	0.0722544	0.0950498	865	-0.00400315	0.011108	0.718562	37510	-1.59701	0.110262
ahsa1	0.158685	0.0894511	0.0764075	893	0.0142272	0.0139035	0.306183	38610	1.59578	0.110538
acaa1	0.178814	0.122505	0.144694	1028	-0.0186305	0.0173775	0.283678	44017	1.59575	0.110544
hepacam2	0.0928615	0.0647157	0.151662	895	-0.0113386	0.00874642	0.194854	38704	1.59562	0.110575
lamb1	0.0769588	0.0482448	0.111034	880	-0.000554422	0.00628762	0.929737	37767	1.59319	0.111117
rtkn2	-0.126474	0.0694321	0.0688703	865	-0.0145675	0.0108728	0.180316	37510	-1.59234	0.111309
cd27	-0.116108	0.0746539	0.120181	1052	0.00350761	0.00851733	0.680473	45247	-1.59194	0.111398
ptprs	-0.0599023	0.0363918	0.100052	1064	-0.00155962	0.00509718	0.759624	45660	-1.58769	0.112357
gstm4	0.161219	0.107011	0.13229	865	-0.010001	0.0149696	0.504082	37510	1.58459	0.113059
cspg4	0.0818831	0.0539107	0.12915	897	-0.00392884	0.0068977	0.568961	38800	1.57887	0.114365
dgcr6	0.0834741	0.0621925	0.179888	867	-0.0156993	0.00926365	0.0901366	37546	1.57722	0.114745
btn1a1	0.0692547	0.0524728	0.187235	892	-0.0144747	0.00830905	0.0815092	38535	1.57604	0.115017
tnfsf13b	0.0699549	0.0498585	0.16089	1064	-0.00903836	0.00578822	0.11841	45585	1.57378	0.115539
pard3	-0.160174	0.10195	0.116519	884	0.00209679	0.0155146	0.892494	38105	-1.57355	0.115591
ache	0.0711405	0.0522319	0.173545	880	-0.0117453	0.00695529	0.0912872	37950	1.573	0.11572
pde1c	-0.114877	0.0733502	0.117685	862	0.00175418	0.0115672	0.879463	37377	-1.57065	0.116265
ddc	0.0904921	0.0684427	0.186405	1049	-0.0181528	0.0100941	0.0721267	45058	1.5704	0.116323
tex101	-0.13542	0.0817419	0.0979491	867	-0.00601906	0.0105661	0.568914	37741	-1.56998	0.11642
mgmt	0.290597	0.171445	0.0903755	1050	0.0185725	0.0253747	0.464216	45034	1.56956	0.116517
scarb2	-0.0956886	0.0647232	0.139605	1016	0.00634217	0.00658052	0.335162	43909	-1.56833	0.116804
ctla4	-0.0611164	0.0413812	0.140052	897	0.00441045	0.00616641	0.474466	38800	-1.5662	0.117302
c1s	0.0548127	0.0325838	0.0928779	898	0.00333312	0.00440419	0.449171	38862	1.56568	0.117424
il2	0.0707553	0.0435004	0.104138	1042	0.00195681	0.00652752	0.764348	44249	1.56405	0.117806
sart1	0.0667748	0.047009	0.155834	865	-0.00783062	0.00809244	0.333227	37510	1.56404	0.117808
alpp	0.242431	0.161337	0.133237	1043	-0.0130077	0.0258102	0.614281	44888	1.56338	0.117963
asgr2	-0.0624268	0.0436086	0.152629	900	0.00620675	0.00539882	0.250296	38840	-1.56193	0.118304
gapdh	0.0790098	0.0486354	0.104634	853	0.00231193	0.00695453	0.739563	37128	1.56112	0.118496
enpp7	0.194252	0.12302	0.114644	1014	9.2546e-05	0.0183521	0.995976	43731	1.561	0.118524
slamf7	0.133387	0.0868942	0.125074	1050	-0.00357113	0.0122109	0.76994	45034	1.56081	0.118568
gsr	0.0471649	0.0335482	0.160109	891	-0.00557168	0.00470622	0.236461	38619	1.55672	0.119537
zp4	-0.0687909	0.0450181	0.126864	862	0.00199927	0.006943	0.773383	37377	-1.55411	0.120159
s100a12	0.152657	0.107559	0.156117	1031	-0.0162786	0.0158544	0.304542	44475	1.55385	0.12022
slc44a4	-0.144822	0.0969957	0.135782	867	0.00748833	0.014314	0.600874	37741	-1.55346	0.120314
coch	0.11529	0.0704108	0.1019	900	0.00504359	0.00961687	0.599967	38800	1.55136	0.120816
ca7	-0.0689245	0.0509475	0.176451	884	0.010874	0.00712315	0.126877	38105	-1.5512	0.120854
thbd	-0.0754889	0.0520045	0.146917	1052	0.0056017	0.00583372	0.336946	45128	-1.54958	0.121242
nme1	-0.0431368	0.0320473	0.178648	859	0.00699553	0.00449846	0.119932	37668	-1.54914	0.121348
commd9	-0.0988531	0.0598067	0.0987095	893	-0.00609206	0.00828121	0.461949	38610	-1.53636	0.124451
adcyap1r1	0.0623934	0.0375914	0.0972653	1028	0.00372712	0.00730027	0.609672	44017	1.53201	0.12552
naprt	-0.0719544	0.0487485	0.140289	895	0.00343148	0.00691644	0.619802	38704	-1.53109	0.125747
ssb	0.141185	0.0829663	0.0891133	1025	0.0128543	0.0120874	0.287586	44031	1.53062	0.125863
arntl	0.125899	0.0765691	0.100488	865	0.0075321	0.0108995	0.48954	37510	1.53046	0.125903
eif5a	0.0691328	0.0407936	0.0904333	1042	0.00601103	0.0062515	0.336289	44249	1.52949	0.126143
hmbs	0.097601	0.0625614	0.11904	1060	0.000915861	0.00909705	0.919808	45479	1.52936	0.126175
aspn	-0.0683817	0.0419727	0.103624	900	-0.00364241	0.0057091	0.523477	38800	-1.52834	0.126428
stx7	0.1115	0.0709078	0.116212	859	0.00209553	0.0105586	0.842681	37668	1.52609	0.126988
myl1	-0.093599	0.0676907	0.167102	865	0.0104551	0.00839645	0.213074	37510	-1.52551	0.127133
efcab2	-0.0721123	0.0489828	0.141326	884	0.00340506	0.00732319	0.641956	38105	-1.52476	0.127318
siglec15	-0.158624	0.103877	0.12706	1025	0.00146935	0.0162527	0.927964	44031	-1.52266	0.127843
crh	-0.18733	0.128696	0.14581	1027	0.0105148	0.0182821	0.565197	43949	-1.52202	0.128003
amy2b	-0.119951	0.0740254	0.105468	978	-0.00631476	0.0103585	0.542115	42085	-1.52029	0.128438
ccl13	0.15694	0.100524	0.118771	1058	0.00270262	0.0143407	0.850518	45523	1.51896	0.128772
cd70	0.0924479	0.0616079	0.133765	1050	-0.00209424	0.00894307	0.81485	45034	1.51866	0.128847
anxa3	0.137614	0.0985336	0.162822	1059	-0.0135678	0.0146856	0.35555	45424	1.51756	0.129126
fcn1	0.103754	0.0827261	0.210104	895	-0.0227906	0.0118754	0.0549735	38769	1.51416	0.129986
defb103a_defb103b	-0.0851138	0.0594717	0.152754	846	0.00577273	0.00858269	0.501205	37388	-1.51256	0.130391
kiaa2013	-0.106412	0.0761986	0.162908	893	0.0100227	0.0115896	0.387153	38610	-1.51068	0.130871
c7orf50	0.0407722	0.0287743	0.156843	895	-0.00332577	0.00498041	0.504284	38704	1.51009	0.131019
nubp1	-0.197616	0.137218	0.150176	893	0.0117359	0.0205779	0.568465	38610	-1.50881	0.131347
lta	-0.0945582	0.0570609	0.0977902	1050	-0.00764366	0.00837923	0.36166	45034	-1.50703	0.131804
iglon5	0.218826	0.145084	0.131854	862	-0.00174079	0.0193572	0.928343	37377	1.50692	0.131832
wif1	0.0878157	0.0561236	0.117957	1060	0.00260667	0.0071539	0.715583	45479	1.50605	0.132054
ivd	0.103516	0.0717789	0.149566	1025	-0.0056447	0.0103109	0.584072	44031	1.50534	0.132236
eppk1	0.124477	0.0989838	0.208889	880	-0.0258526	0.0150424	0.0856876	37767	1.50149	0.133228
capg	0.126211	0.0849369	0.137598	1044	-0.00254358	0.0125825	0.839799	44755	1.49952	0.133738
fuom	0.104739	0.0861539	0.224419	880	-0.0260781	0.0137883	0.0585882	37950	1.49933	0.133787
ceacam8	0.117284	0.0766918	0.126502	1030	0.00125113	0.0104582	0.904775	44275	1.4991	0.133848
aamdc	0.112341	0.0707587	0.112725	880	0.0051576	0.0111323	0.643152	37767	1.49636	0.134559
efhd1	-0.0915916	0.0571589	0.109422	894	-0.00552527	0.0072247	0.44441	38726	-1.49385	0.135214
hsd17b14	0.126107	0.0943765	0.18182	895	-0.0161818	0.0129634	0.21194	38704	1.49365	0.135267
mrps16	-0.0572762	0.0359711	0.111691	859	-0.00275996	0.00622153	0.657324	37668	-1.49339	0.135336
tgfbr2	-0.090041	0.0637248	0.157963	1052	0.00549822	0.00692817	0.42743	45247	-1.49046	0.136102
fstl1	0.0524518	0.0372244	0.159169	880	-0.00347091	0.00476564	0.466422	37767	1.49015	0.136184
tnfrsf21	-0.0660632	0.0458826	0.150212	1060	0.00254446	0.00566824	0.653508	45500	-1.48401	0.137807
pla2g1b	-0.112242	0.0701285	0.109781	1063	-0.00735633	0.0089704	0.412182	45587	-1.48354	0.137931
heph	0.0794587	0.0536112	0.138658	900	-0.000412725	0.0055004	0.940187	38800	1.48205	0.138328
nek7	-0.140615	0.110214	0.202347	884	0.0242152	0.0155374	0.119121	38105	-1.48091	0.13863
mgll	0.178506	0.126278	0.15778	1053	-0.0104204	0.0181764	0.566449	45235	1.48085	0.138648
klrb1	-0.0873942	0.0608756	0.151407	1060	0.00344142	0.00783092	0.660326	45599	-1.47996	0.138885
ccn2	0.122149	0.0779377	0.117358	1047	0.00553937	0.0119278	0.642358	45088	1.47896	0.13915
ankrd54	0.116406	0.0845009	0.168638	1028	-0.0098193	0.0122083	0.421222	44017	1.47842	0.139295
ilkap	0.111283	0.0824802	0.177572	1023	-0.0118497	0.0121552	0.329628	43966	1.47692	0.139697
ifnlr1	-0.0778814	0.0520404	0.134811	1050	-0.000209719	0.00785379	0.978697	45034	-1.47581	0.139994
relt	-0.0728045	0.0531342	0.170919	1047	0.0059935	0.00596428	0.31495	45114	-1.47374	0.14055
prtg	0.0501529	0.0389288	0.197916	1060	-0.00770227	0.00514665	0.134515	45479	1.47336	0.140655
itgb1	0.041244	0.0318663	0.195855	1048	-0.00614135	0.00448317	0.170735	45076	1.4725	0.140886
hla_e	-0.0721227	0.0507382	0.155479	1050	0.00309374	0.00596856	0.604225	45034	-1.47229	0.140943
nt5e	0.121383	0.0881452	0.168783	1052	-0.00947188	0.011691	0.417837	45247	1.47165	0.141116
tyrp1	-0.135769	0.0910198	0.136162	859	-0.000868487	0.0128225	0.946	37668	-1.46761	0.14221
hbq1	0.144114	0.102286	0.159149	1060	-0.00700448	0.0127088	0.581533	45479	1.46614	0.14261
s100p	0.111781	0.082009	0.173171	1030	-0.00964755	0.0115987	0.405538	44275	1.46608	0.142625
furin	0.075145	0.0504617	0.136749	1052	0.000318636	0.0077284	0.967113	45247	1.46574	0.142718
dusp29	0.147059	0.10328	0.154839	867	-0.00562666	0.013782	0.683085	37741	1.46539	0.142816
vsig10	0.060895	0.0485854	0.210404	893	-0.0110005	0.00728317	0.130948	38610	1.46343	0.143351
pik3ap1	0.128042	0.0880613	0.146243	1050	-0.00181123	0.0130619	0.889715	45034	1.45862	0.14467
cthrc1	0.0700412	0.0506203	0.166809	897	-0.00423817	0.00599721	0.479763	38800	1.45719	0.145063
cpox	0.0509315	0.0402619	0.206215	859	-0.00831171	0.00568638	0.143835	37668	1.45699	0.14512
yju2	-0.065844	0.0439003	0.134008	893	-0.00117617	0.00681426	0.862963	38610	-1.45563	0.145495
mylpf	-0.122461	0.0814545	0.133097	867	-0.00310107	0.0100883	0.758545	37741	-1.45424	0.14588
afp	0.161122	0.0940977	0.0871449	1038	0.023083	0.014018	0.0996347	44614	1.45096	0.146791
mep1b	-0.24566	0.16068	0.126597	1052	-0.00990075	0.0244963	0.686087	45128	-1.4505	0.146919
apob	-0.0422386	0.0310729	0.174381	900	0.00334433	0.0047039	0.477107	38840	-1.45044	0.146935
pvr	0.0818015	0.0537527	0.128356	1060	0.00315347	0.00760803	0.678516	45500	1.44871	0.14742
mmut	-0.0969621	0.0686915	0.158442	865	0.00365529	0.0103591	0.724197	37510	-1.44839	0.147507
tnfrsf4	-0.0986417	0.0639023	0.122978	1058	-0.00558915	0.00788724	0.478556	45526	-1.4452	0.148401
ca14	-0.0857333	0.0595108	0.149985	1060	0.000958691	0.00767863	0.900641	45479	-1.44477	0.148524
babam1	-0.0515969	0.0377338	0.171862	859	0.00351936	0.00607982	0.562687	37668	-1.44206	0.149285
rictor	-0.0899494	0.0747016	0.228878	859	0.0186846	0.0100251	0.0623601	37668	-1.44132	0.149495
hs6st2	-0.0814941	0.0559756	0.145792	859	-0.000245862	0.0069136	0.971632	37668	-1.44055	0.149713
atraid	-0.0742769	0.0503431	0.140456	893	-0.00132685	0.00592635	0.822845	38629	-1.43912	0.150117
il3	0.10412	0.0787579	0.186513	862	-0.0101513	0.012656	0.422503	37377	1.43254	0.15199
tp53i3	0.10634	0.0745366	0.154038	854	-0.00109615	0.0113169	0.922838	37140	1.42506	0.15414
cd3e	0.0927645	0.068263	0.174518	884	-0.00503616	0.00727817	0.48897	38105	1.42463	0.154265
nampt	0.0744011	0.0668944	0.266306	1028	-0.0221657	0.0113958	0.0517719	44017	1.42307	0.154716
podxl2	-0.0612947	0.0449461	0.172944	1052	0.00318873	0.00585651	0.586117	45247	-1.42266	0.154836
ppcdc	0.0871728	0.0653695	0.182643	1060	-0.00682769	0.00993453	0.491917	45500	1.42166	0.155124
tgfbr1	-0.042676	0.0331123	0.197808	859	0.00482846	0.0045342	0.28693	37668	-1.42138	0.155206
nfya	0.0746224	0.0596454	0.211238	865	-0.0109433	0.00831503	0.188154	37510	1.42083	0.155366
sgsh	0.0931059	0.07878	0.237587	881	-0.0199332	0.0117358	0.0894207	38140	1.41921	0.155838
clps	-0.174482	0.107192	0.10388	1046	-0.0212919	0.0145303	0.142833	45040	-1.41617	0.156726
apbb1ip	0.088265	0.0695551	0.204728	1043	-0.011131	0.00977476	0.254814	44888	1.41512	0.157034
ngfr	0.0541186	0.0386846	0.162168	900	-0.00124154	0.00615023	0.84002	38800	1.41332	0.157563
ppp3r1	0.0745093	0.0561197	0.184575	1041	-0.00573651	0.00870249	0.509783	44759	1.41302	0.157651
nfx1	0.139044	0.0986676	0.159132	865	-0.00176096	0.0144018	0.902683	37510	1.4121	0.15792
ifi30	0.0831817	0.0619066	0.179409	872	-0.00505266	0.00858506	0.556173	37688	1.41177	0.158018
dner	0.0541931	0.0386937	0.161641	1049	-0.000957618	0.00542651	0.859925	45014	1.4115	0.158097
pcbd1	0.0810764	0.0681043	0.234184	878	-0.0160949	0.0103034	0.118274	37876	1.41075	0.158319
serpini1	0.0596932	0.0406797	0.142628	880	0.00164548	0.00633282	0.794993	37879	1.40996	0.158551
adamts4	-0.0732945	0.0545406	0.179354	859	0.00413391	0.00744188	0.578561	37668	-1.40661	0.159542
sumf1	-0.133342	0.0935472	0.154407	859	-0.00034089	0.0139738	0.980538	37668	-1.40615	0.159679
c2	-0.0483287	0.0321856	0.133513	1050	-0.00257116	0.00493841	0.602616	45223	-1.40523	0.159953
gzmb	0.127366	0.0885952	0.150841	1050	0.00141791	0.0136924	0.917523	45034	1.40494	0.16004
evi2b	-0.0777806	0.0547803	0.156011	862	1.12455e-05	0.0082596	0.998914	37377	-1.4042	0.16026
fbn2	0.132437	0.0838516	0.114607	867	0.0134995	0.0124208	0.277111	37741	1.40312	0.160582
fgr	0.10836	0.0921338	0.239823	1025	-0.0219977	0.0127708	0.0849868	44031	1.40147	0.161072
psrc1	0.0916485	0.0817033	0.262243	1028	-0.0241311	0.0124936	0.0534318	44017	1.40079	0.161277
kcnh2	-0.147008	0.107521	0.171905	867	0.00518232	0.0159128	0.744676	37741	-1.40019	0.161456
scg2	-0.0749929	0.0548712	0.17201	1052	0.00238586	0.0067089	0.722123	45277	-1.39977	0.161584
il32	0.0872515	0.0636787	0.170924	1050	-0.00269852	0.00886141	0.760729	45034	1.39908	0.161789
ctsl	0.0564103	0.0411145	0.170348	1052	-0.00152893	0.00499736	0.759646	45128	1.39892	0.161837
lama1	-0.106237	0.0771638	0.16894	865	0.0027996	0.0112033	0.802674	37510	-1.3984	0.161994
tars1	-0.0695943	0.0519251	0.180496	893	0.00378626	0.0077579	0.625516	38610	-1.39769	0.162207
lypd8	-0.102477	0.0659937	0.120774	1028	-0.00937554	0.0102371	0.359758	44017	-1.39409	0.163291
cd5	-0.0741272	0.0553766	0.18099	1058	0.00368355	0.00725631	0.611713	45413	-1.39321	0.163557
angpt1	0.18152	0.123998	0.143526	1048	0.0071717	0.0175147	0.682199	44945	1.39223	0.163853
dcxr	0.0772147	0.0747994	0.302174	1052	-0.0281117	0.0114687	0.0142435	45247	1.39185	0.163967
plxnb2	0.0402602	0.0363865	0.268779	1062	-0.0108336	0.00496689	0.0291771	45435	1.39129	0.164136
dpt	-0.0456744	0.0405672	0.260465	1064	0.0113181	0.00580022	0.0510239	45660	-1.39075	0.164302
ca8	0.0635395	0.043775	0.147007	859	0.00227185	0.0055215	0.680742	37668	1.3886	0.164954
st3gal1	0.0771501	0.0569557	0.175852	1043	-0.00288534	0.00884941	0.744389	44888	1.38856	0.164966
tpr	0.0530108	0.0606813	0.382583	865	-0.0324975	0.0107223	0.00244047	37510	1.38764	0.165246
ifnw1	0.0668617	0.0465418	0.151197	865	0.00146903	0.00747933	0.844289	37510	1.38723	0.165371
scp2	0.126034	0.101564	0.214914	1028	-0.016501	0.0161503	0.306921	44017	1.38599	0.165749
mfap3	0.0892497	0.068093	0.190252	1030	-0.00613633	0.0101142	0.544049	44275	1.38562	0.165864
chl1	0.0527614	0.0436402	0.226933	1047	-0.00831336	0.00640747	0.194484	45228	1.38466	0.166156
tor1aip1	0.0860729	0.073537	0.24213	880	-0.0169268	0.0112279	0.131672	37767	1.38461	0.166173
mapre3	-0.307659	0.208316	0.140073	862	-0.0166725	0.0307834	0.588093	37377	-1.38185	0.167018
il10rb	-0.0755311	0.0516529	0.143963	1053	-0.00366336	0.00607785	0.546685	45311	-1.38183	0.167025
fas	-0.0726736	0.0540027	0.178675	1062	0.00246712	0.00685548	0.718942	45513	-1.38035	0.16748
rln2	0.142481	0.0895886	0.112107	878	0.0146908	0.0236441	0.534385	37883	1.37919	0.167836
selp	0.0999391	0.0775768	0.197939	1053	-0.00819567	0.0118804	0.490294	45299	1.37784	0.168252
clec3b	0.0503972	0.0328587	0.125451	881	0.00474221	0.00450849	0.29288	37960	1.37654	0.168656
ncs1	0.0684439	0.0446442	0.125552	1060	0.00649159	0.00587804	0.269434	45479	1.37581	0.168879
crnn	-0.132262	0.103685	0.202385	1022	0.0115016	0.0138695	0.406957	43793	-1.3743	0.16935
fus	0.0710522	0.0532969	0.182783	1027	-0.00306514	0.00841817	0.715778	43948	1.37362	0.169559
lhpp	0.123297	0.0851962	0.148136	1051	0.00510639	0.0125196	0.683369	45169	1.37254	0.169896
srpx	0.076788	0.0632342	0.224937	900	-0.0105248	0.00735004	0.152171	38800	1.37155	0.170204
psip1	0.0991981	0.0875493	0.257451	1050	-0.0222952	0.0137574	0.105112	45034	1.37089	0.170409
rrm2	0.0767473	0.0664741	0.248547	1028	-0.0154473	0.0106635	0.14745	44017	1.36942	0.170869
epha1	-0.0656388	0.0509792	0.198183	1052	0.00485608	0.00716484	0.497924	45243	-1.36936	0.170887
casq2	0.0820127	0.0640745	0.200905	865	-0.00678447	0.0101224	0.502705	37510	1.36887	0.171041
ranbp1	-0.10505	0.0761263	0.167957	880	0.000256006	0.0111045	0.981607	37767	-1.36882	0.171056
rbpms	-0.0956927	0.087165	0.272587	859	0.0250212	0.0139262	0.0723904	37668	-1.36754	0.171455
glp1r	0.0841804	0.0561844	0.134425	867	0.00668681	0.00782727	0.392946	37546	1.36608	0.171914
postn	0.0667376	0.0578856	0.249251	897	-0.012954	0.00776864	0.0954286	38800	1.36447	0.172418
wfdc1	-0.0850787	0.0719655	0.237444	874	0.0142585	0.011268	0.205738	37831	-1.36373	0.172653
ggt1	0.10394	0.081671	0.20342	1046	-0.00821845	0.0108084	0.447033	45037	1.36143	0.173379
cd248	0.0775197	0.0605107	0.200494	897	-0.00557879	0.00829908	0.501449	38800	1.36055	0.173656
nos3	0.111347	0.0830839	0.180485	1025	-0.00266716	0.0112128	0.811986	44031	1.35995	0.173845
prss27	-0.0783247	0.0573316	0.17218	1050	0.000353787	0.00823831	0.965746	44983	-1.35839	0.174341
prrt3	-0.0976516	0.0694085	0.159809	880	-0.0027675	0.00788487	0.725599	37767	-1.3583	0.174368
naa10	-0.0875244	0.0705119	0.214844	865	0.00932081	0.0106156	0.379933	37510	-1.35815	0.174415
phykpl	0.075126	0.0551972	0.173849	880	-0.000787958	0.00880597	0.928701	37950	1.35815	0.174417
vwc2	-0.0817726	0.0656149	0.212955	1037	0.00801568	0.00830538	0.33449	44614	-1.35758	0.174597
fn1	0.0532752	0.0393218	0.175808	898	-0.000632863	0.00568208	0.911316	38862	1.35685	0.174828
calb1	-0.0912641	0.0731458	0.212422	1043	0.00870589	0.00899923	0.333347	44888	-1.3565	0.174942
fcer1a	0.0537357	0.034854	0.123493	894	0.00599332	0.00493715	0.224785	38726	1.35624	0.175022
cpa1	-0.14425	0.0941875	0.12594	1064	-0.0156133	0.0123959	0.207837	45660	-1.35407	0.175713
snx5	-0.0538376	0.040593	0.185094	880	0.00177978	0.0063097	0.777891	37767	-1.35386	0.17578
atp1b4	0.0817049	0.0585192	0.163014	862	0.00164907	0.00880744	0.851477	37377	1.35279	0.176123
dnaja1	-0.0717416	0.0600967	0.232899	862	0.010469	0.00970631	0.280784	37377	-1.35047	0.176865
fgf9	-0.0660715	0.0572884	0.249104	859	0.0120336	0.00849753	0.156747	37316	-1.34861	0.177462
cngb3	-0.101719	0.0681993	0.136197	867	-0.00852622	0.0113177	0.451244	37546	-1.34804	0.177646
igsf9	0.183751	0.130442	0.159278	900	0.00605575	0.0193675	0.754529	38800	1.34748	0.177825
vti1a	0.111179	0.0763855	0.145891	880	0.00722989	0.0123664	0.558795	37950	1.34335	0.179158
nfkb2	-0.124335	0.0794523	0.117965	884	-0.0167514	0.0118029	0.155832	38105	-1.33937	0.18045
rtbdn	-0.0654762	0.0464551	0.159001	1043	-0.00274969	0.0061658	0.65563	44888	-1.33852	0.180726
bsg	-0.0375013	0.0342127	0.273277	1058	0.00861828	0.00424181	0.0421849	45526	-1.33778	0.180968
scn4b	-0.100833	0.0723946	0.164027	880	-0.00335052	0.00878655	0.702965	37767	-1.33673	0.18131
lmnb2	0.0621601	0.0477602	0.193423	895	-0.0021387	0.0060104	0.721968	38704	1.33575	0.181632
nos2	0.063559	0.0551422	0.249379	865	-0.010921	0.00835684	0.191276	37510	1.33544	0.181732
klk10	0.0769	0.0644768	0.233267	1048	-0.00991354	0.0083679	0.236138	45111	1.33523	0.1818
inpp5j	0.100743	0.0688456	0.143734	894	0.00812731	0.00871418	0.351005	38726	1.33462	0.182001
upb1	0.141595	0.12538	0.259065	900	-0.0277937	0.020007	0.164781	38800	1.33412	0.182165
rtn4r	-0.0782232	0.0549929	0.155199	1060	-0.004159	0.00763621	0.586003	45479	-1.334	0.182205
cd2	0.0825981	0.0592982	0.164002	865	0.00286335	0.00809022	0.723396	37510	1.3323	0.182762
epn1	-0.0733463	0.0650881	0.260102	884	0.0140739	0.00895483	0.116038	38105	-1.33057	0.183329
sort1	0.0685372	0.0531323	0.197359	1049	-0.00284409	0.00777841	0.714636	45058	1.32929	0.183751
ager	-0.0966408	0.0729698	0.185662	1050	0.000770673	0.00848165	0.927601	45007	-1.32603	0.18483
pon1	0.0551629	0.0414943	0.184051	900	-0.000318174	0.00543016	0.953276	38840	1.32577	0.184914
lap3	0.0785926	0.0647754	0.225288	1042	-0.00830506	0.0101132	0.41153	44249	1.32546	0.185017
ifit1	-0.115745	0.0766937	0.131612	884	-0.0131719	0.0108025	0.222724	38105	-1.32436	0.185383
kyat1	0.0982059	0.0734742	0.181643	1052	-0.000357727	0.0119313	0.976081	45053	1.32413	0.185461
amn	-0.0804868	0.068702	0.241653	1042	0.0113717	0.00995831	0.253489	44249	-1.32323	0.18576
rbp1	-0.133679	0.102139	0.190954	867	0.00245577	0.0148492	0.868646	37741	-1.31897	0.187179
tspan8	0.171476	0.136302	0.208702	893	-0.0101223	0.0205253	0.621902	38629	1.31747	0.187682
fam171b	-0.0520264	0.0397337	0.190746	893	0.0008049	0.00563069	0.886332	38610	-1.31648	0.188013
fgf12	-0.0894842	0.0694157	0.19771	859	0.0027943	0.00975831	0.774611	37668	-1.31642	0.188034
fzd8	-0.0882408	0.0651999	0.176286	867	-0.00164116	0.00892411	0.854092	37546	-1.31595	0.188191
scgb3a2	0.183146	0.130309	0.160176	1053	0.0101581	0.0180517	0.573626	45235	1.31496	0.188522
bnip2	-0.0594514	0.0504639	0.239071	900	0.00751328	0.00710376	0.290222	38800	-1.31403	0.188838
ddx53	-0.0665644	0.0480063	0.16593	867	-0.00280446	0.00748103	0.707755	37741	-1.31232	0.189413
pzp	-0.0644824	0.0629943	0.306291	898	0.019453	0.0112239	0.0830722	38862	-1.31177	0.189598
mcee	-0.082783	0.0570415	0.147055	894	-0.00714599	0.00882489	0.418087	38726	-1.31041	0.190057
insr	0.0301687	0.0274454	0.271979	859	-0.00605397	0.00350838	0.0844324	37668	1.30916	0.190481
hyou1	-0.0464666	0.037635	0.21723	1064	0.00316073	0.00458229	0.490341	45660	-1.30898	0.190541
amdhd2	-0.04568	0.0362896	0.208445	897	0.00230483	0.00531753	0.664697	38800	-1.3083	0.19077
bag4	0.0859484	0.0664865	0.196457	859	-0.00207875	0.0105716	0.844113	37668	1.30756	0.191022
gip	0.122252	0.0858832	0.154958	880	0.00910787	0.0110129	0.408231	37767	1.30671	0.19131
stau1	-0.105746	0.0876645	0.228049	862	0.0102011	0.0140154	0.466709	37377	-1.30604	0.191538
ddx4	-0.0794067	0.0695035	0.253572	859	0.0124634	0.0113436	0.271898	37668	-1.30455	0.192047
fgfbp1	-0.0614355	0.0478117	0.199095	1052	0.00155113	0.00677606	0.818938	45247	-1.30435	0.192113
clu	0.057293	0.0384332	0.136389	898	0.00646377	0.00644245	0.315718	38862	1.30434	0.192118
maneal	0.0994247	0.0752786	0.186935	862	0.000381253	0.0105484	0.971168	37377	1.30296	0.192587
adamts8	0.0675013	0.0678618	0.320118	1052	-0.0217239	0.00950357	0.0222667	45247	1.3021	0.192882
cblif	0.188142	0.137001	0.169955	1049	0.00889943	0.0151736	0.557539	45058	1.30039	0.193469
rnf4	-0.115966	0.0917754	0.206714	884	0.00450043	0.0137584	0.74359	38105	-1.29812	0.194247
bcan	-0.0775527	0.0539933	0.151207	1041	-0.00685888	0.00740999	0.354645	44759	-1.29715	0.19458
plat	0.111486	0.0788383	0.157625	1062	0.00823106	0.0112761	0.465422	45513	1.29651	0.1948
c1qtnf5	0.0773456	0.0577518	0.180829	880	0.00186997	0.00777464	0.809927	37950	1.29521	0.195247
cd2ap	0.11172	0.0882827	0.205979	1052	-0.00379815	0.0136556	0.780907	45128	1.29313	0.195966
bpifb1	-0.133284	0.0944823	0.158636	1055	-0.00989957	0.0136961	0.469807	45010	-1.29239	0.196222
thpo	-0.0682326	0.0556302	0.220278	1030	0.00438193	0.00803191	0.585368	44275	-1.29191	0.196388
thsd1	0.062551	0.0470951	0.184476	850	0.00102455	0.00709768	0.885225	37370	1.29184	0.196412
pappa	0.100785	0.0661879	0.128135	1042	0.0143634	0.00973214	0.139985	44249	1.29181	0.196422
angptl1	0.0463533	0.0416181	0.265636	1029	-0.007959	0.00603702	0.187388	44488	1.2915	0.19653
jam2	-0.0560273	0.0473065	0.236543	1060	0.00536881	0.005406	0.320657	45500	-1.28944	0.197244
cdhr2	0.14345	0.106676	0.179005	1043	0.00438072	0.0165356	0.791067	44888	1.28828	0.197648
odam	0.107235	0.0804126	0.182648	1024	0.00265436	0.0113517	0.815119	43958	1.28778	0.197824
arnt	0.0592851	0.051666	0.251453	1042	-0.00794328	0.00776122	0.306098	44249	1.28677	0.198173
cyp24a1	0.141582	0.123466	0.251813	865	-0.0188034	0.0180192	0.296713	37510	1.28541	0.19865
pts	0.0913988	0.0817155	0.263618	1021	-0.014765	0.012019	0.219277	43831	1.28536	0.198667
cyth3	-0.0982664	0.107137	0.359295	862	0.0408584	0.0154234	0.00807358	37377	-1.28532	0.198681
gimap7	0.0445252	0.0403222	0.269795	880	-0.0079654	0.00674254	0.237465	37950	1.28395	0.199159
krt18	0.10522	0.116653	0.367267	1043	-0.046154	0.0178807	0.00984834	44888	1.28267	0.199608
sod2	0.0607456	0.0529339	0.251408	1047	-0.00787013	0.00783225	0.314981	45114	1.28229	0.199741
aldh2	-0.122795	0.0805613	0.127803	893	-0.0190834	0.0107281	0.0752746	38610	-1.2761	0.201919
klrc1	-0.097104	0.0801511	0.226031	867	0.00642302	0.012669	0.612167	37546	-1.27581	0.202023
gba	-0.10568	0.0843037	0.210342	867	0.00281123	0.0113757	0.804811	37741	-1.27535	0.202186
prss2	-0.119623	0.0899183	0.183691	1053	-0.00412743	0.0109032	0.705021	45299	-1.27511	0.20227
fgf3	0.0641117	0.0418065	0.125515	859	0.0102268	0.00625229	0.101914	37668	1.27474	0.202403
brsk2	-0.0581132	0.0494579	0.240308	894	0.00568986	0.00801747	0.477906	38726	-1.27342	0.202868
sap18	-0.115286	0.0991693	0.245342	884	0.0124242	0.0152566	0.41545	38105	-1.27282	0.203081
tmprss11d	0.0763989	0.0636356	0.230239	891	-0.00520301	0.00792867	0.511681	38638	1.27249	0.203198
kynu	0.0657007	0.061561	0.286105	1060	-0.0135996	0.00972342	0.161926	45599	1.27239	0.203236
sez6	-0.0649096	0.0517366	0.209958	867	0.00138465	0.00642789	0.829447	37741	-1.2716	0.203514
scg3	0.061541	0.0528151	0.244197	1052	-0.00619419	0.00706857	0.380872	45160	1.27116	0.203671
gid8	-0.0558848	0.0405705	0.168713	894	-0.0035955	0.0068676	0.600598	38726	-1.27077	0.20381
sult1a1	0.202696	0.183036	0.26837	1060	-0.0321611	0.0268433	0.230882	45500	1.26954	0.20425
gask1a	0.0924486	0.0628539	0.141698	865	0.0119578	0.00912865	0.190231	37510	1.26731	0.205046
itih3	-0.074787	0.0530269	0.15873	1053	-0.00701335	0.00788186	0.373573	45299	-1.26421	0.206155
ror1	-0.0600702	0.0529053	0.256456	1052	0.00714955	0.00651071	0.272157	45128	-1.26105	0.207289
pon3	0.0591333	0.0509381	0.245953	1053	-0.00544993	0.0061413	0.374856	45311	1.25876	0.208116
serpine1	0.125872	0.0967645	0.193605	1064	0.0030044	0.0141142	0.831434	45660	1.25647	0.208946
il7	0.108038	0.0881218	0.220473	1050	-0.00390257	0.0134756	0.772121	45034	1.25569	0.209227
itgb1bp1	-0.0696696	0.0592186	0.239676	1028	0.00533786	0.00852747	0.531344	44017	-1.25369	0.209955
ece1	0.0666473	0.0526174	0.205573	1025	5.4412e-05	0.00739233	0.994127	44031	1.2533	0.210097
polr2a	-0.050258	0.0424782	0.237079	859	0.00346381	0.00612031	0.571429	37668	-1.25177	0.210655
ceacam6	0.0720528	0.0637604	0.258757	897	-0.0083124	0.00873967	0.341554	38800	1.24875	0.211757
ptgds	-0.0692343	0.0543044	0.202621	1038	-0.0010982	0.0062068	0.85956	44775	-1.24659	0.212548
rspo3	-0.0539762	0.0471892	0.252955	1060	0.00524691	0.00575515	0.361937	45479	-1.24578	0.212843
nppc	-0.1019	0.0842435	0.22671	1050	0.00374335	0.00984993	0.703918	45034	-1.24554	0.212933
bcl2l15	0.0927193	0.0819362	0.258119	859	-0.0104544	0.0122895	0.394955	37668	1.24527	0.213034
atrn	0.0279583	0.0241614	0.247521	898	-0.0024234	0.00353228	0.492672	38862	1.24422	0.213418
sugp1	0.0700083	0.0550224	0.203579	893	0.000737289	0.00855851	0.93135	38629	1.244	0.2135
csf3	-0.0844398	0.0684182	0.217419	1042	0.00155112	0.0102677	0.879922	44249	-1.24292	0.213896
nmnat1	0.112224	0.109133	0.304039	1041	-0.024332	0.0157301	0.121907	44759	1.23848	0.215539
artn	0.0751243	0.0712674	0.292074	1042	-0.013857	0.00923655	0.133561	44249	1.2382	0.215642
khdc3l	-0.12007	0.0891109	0.1782	862	-0.00859951	0.0139973	0.538976	37377	-1.23577	0.216545
nectin2	-0.0591334	0.0543347	0.276706	1049	0.00843317	0.00610343	0.167067	45058	-1.23575	0.21655
guca2a	-0.0636915	0.0596759	0.286089	1042	0.0105117	0.00694562	0.130179	44892	-1.2351	0.216794
rab6a	0.0783554	0.0625183	0.21037	1050	0.000302518	0.00985997	0.975524	45034	1.23324	0.217488
scrg1	-0.0579806	0.0483765	0.231029	900	0.00205571	0.00564225	0.715605	38800	-1.23266	0.217701
robo1	0.0440603	0.0384569	0.252179	1052	-0.00374306	0.005072	0.460527	45160	1.23237	0.217813
pcare	0.161951	0.136546	0.235928	867	-0.0076766	0.017848	0.667118	37546	1.23179	0.218026
thbs2	0.0875281	0.0746749	0.241416	1047	-0.00491685	0.00769964	0.523099	45114	1.23144	0.21816
slc12a2	0.0527925	0.038338	0.168862	865	0.00505857	0.00576044	0.379864	37510	1.23126	0.218225
dnpep	0.091728	0.077402	0.2363	895	-0.00461194	0.0120996	0.703083	38704	1.22974	0.218796
edil3	0.0617	0.0536238	0.250162	1030	-0.00490614	0.00768837	0.523396	44275	1.22953	0.218874
sez6l	-0.0604688	0.0429888	0.159837	1052	-0.00712761	0.00584266	0.222499	45247	-1.22951	0.218879
olr1	0.110217	0.0860269	0.200413	1038	0.00338816	0.0126687	0.789129	44700	1.22856	0.219237
rab6b	-0.075549	0.0657382	0.250726	1025	0.00608917	0.00996237	0.541059	44031	-1.22785	0.219504
cst6	-0.0844742	0.0764542	0.269465	1021	0.0101755	0.0100281	0.310256	43908	-1.22748	0.219643
bst2	0.0950461	0.0835353	0.255464	1060	-0.00833214	0.0109357	0.44611	45500	1.22707	0.219796
ambp	-0.0384845	0.0356953	0.281219	1058	0.00552513	0.00425175	0.19378	45413	-1.22427	0.220851
mmp12	0.117465	0.0913896	0.198967	1049	0.00475418	0.011377	0.676039	45131	1.22385	0.221009
slit2	0.0861789	0.0708478	0.224116	1025	-0.00149559	0.0108398	0.890263	44031	1.22327	0.221228
cxcl17	0.0968139	0.0724256	0.181597	1060	0.00733596	0.0103651	0.479101	45599	1.22299	0.221335
polr2f	0.0529196	0.0508577	0.298331	1043	-0.00984082	0.00742519	0.185069	44888	1.22109	0.222051
chm	-0.0984349	0.0810342	0.224801	867	0.00171701	0.012748	0.892859	37741	-1.22091	0.222122
was	0.10256	0.0879376	0.243769	1042	-0.00608256	0.0140279	0.664578	44249	1.22002	0.222456
rilp	0.0995006	0.0893011	0.265442	1055	-0.0105145	0.0126477	0.405789	45346	1.21978	0.222547
serpina7	0.0336955	0.0271986	0.21572	898	0.000187339	0.00389289	0.961618	38862	1.21955	0.222635
tbc1d17	0.0832393	0.0667919	0.212959	1025	0.00113678	0.0094391	0.904141	44031	1.21713	0.223553
lgals3	0.0623614	0.0442744	0.159272	1059	0.00793889	0.00627468	0.205796	45224	1.21705	0.223586
igsf3	0.063813	0.0604406	0.291307	1043	-0.0102462	0.00771992	0.184436	44888	1.21545	0.224196
ctrc	-0.126617	0.0974671	0.194205	1050	-0.0074104	0.0131232	0.572296	45088	-1.21211	0.225472
dll1	-0.0614493	0.0521099	0.238576	1052	0.00212912	0.00622903	0.732499	45247	-1.21146	0.22572
rnf41	0.0841437	0.0884289	0.341555	1028	-0.0241764	0.0142444	0.0896547	44017	1.20935	0.226528
irak4	0.172718	0.148008	0.243499	1050	-0.00812121	0.0217352	0.708672	45034	1.20885	0.226721
tnfrsf1a	-0.0660792	0.0590932	0.26373	1047	0.00577213	0.00639161	0.366489	45114	-1.20885	0.226721
igfbp3	0.0675788	0.0499543	0.176407	1053	0.00676055	0.00610963	0.268498	45299	1.20847	0.226866
syngap1	-0.0950899	0.0794303	0.231577	867	0.00173834	0.0119034	0.883892	37546	-1.20557	0.227982
il17a	-0.0784186	0.0683097	0.251239	1042	0.00454803	0.00892152	0.610206	44172	-1.20434	0.228459
rpl14	-0.059989	0.0499879	0.230437	880	0.00109028	0.00856987	0.898765	37767	-1.20431	0.228469
coro1a	0.110291	0.12234	0.367528	1027	-0.038656	0.019124	0.0432511	44216	1.20288	0.229023
serpinb1	0.133132	0.123785	0.282395	1039	-0.0173827	0.0188756	0.357103	44970	1.20205	0.229345
nell2	0.043408	0.0442904	0.327274	1053	-0.0102271	0.0059632	0.0863446	45311	1.20016	0.230078
tmed1	0.105263	0.0800913	0.189094	884	0.00819295	0.0113672	0.471067	38105	1.19996	0.230154
smtn	0.136969	0.123382	0.267247	890	-0.01284	0.0201728	0.524452	38631	1.19828	0.230808
mucl3	-0.0801916	0.062187	0.197564	862	-0.00490585	0.00915029	0.591864	37377	-1.19774	0.231018
cntn2	0.0619371	0.0638219	0.332036	1060	-0.0153103	0.00931876	0.1004	45479	1.19766	0.23105
gas2	0.0787749	0.0777235	0.311087	884	-0.0150282	0.0109584	0.170261	38105	1.19506	0.232063
erbb2	0.0416139	0.0377235	0.270225	1052	-0.00390293	0.00535503	0.466106	45247	1.19461	0.232238
myom1	-0.0832758	0.0722136	0.249153	867	0.00377371	0.00987288	0.702293	37546	-1.19433	0.232347
il17d	0.0563761	0.0471335	0.231933	1042	-0.00050826	0.00697694	0.941927	44249	1.19387	0.232529
spink1	-0.0845491	0.0798049	0.289642	1047	0.0112331	0.00870859	0.197095	45114	-1.19312	0.232822
tigar	0.088539	0.0673243	0.188769	1022	0.00745242	0.00991688	0.452363	43963	1.19156	0.233434
plcb1	-0.0559754	0.0594193	0.346438	859	0.0156961	0.00936698	0.0938092	37668	-1.19148	0.233464
eif4b	0.0976661	0.0807245	0.226605	1041	0.0004477	0.0120477	0.970357	44759	1.19113	0.233602
bid	0.107012	0.089509	0.232148	1050	-0.000904428	0.0142213	0.949291	45034	1.19071	0.233768
gm2a	-0.0835875	0.0734777	0.255606	873	0.0043812	0.00807458	0.587414	37857	-1.19005	0.234026
rangap1	-0.0805037	0.0767578	0.294517	1028	0.0116288	0.0102192	0.255153	44017	-1.1898	0.234124
hjv	-0.0741925	0.0650059	0.254045	894	0.00386116	0.00937771	0.680534	38726	-1.18841	0.23467
mfge8	0.0785919	0.064889	0.226103	1047	0.000763271	0.00913618	0.93342	45114	1.1877	0.234952
pglyrp1	0.0883723	0.0672865	0.189342	1062	0.00784995	0.00887418	0.376386	45443	1.18644	0.23545
cntnap2	0.0606027	0.0604551	0.316362	1050	-0.0118229	0.00860125	0.169277	45034	1.18606	0.235598
ptprm	0.0329419	0.0346903	0.342535	1050	-0.00862783	0.00505525	0.0878834	44958	1.18579	0.235707
c4bpb	-0.0778572	0.0611731	0.203394	1052	-0.00467095	0.00826931	0.572176	45247	-1.1856	0.235782
serpina4	0.0494769	0.0356765	0.165849	881	0.00685357	0.00493906	0.165259	38169	1.18343	0.236638
dpp4	0.0431498	0.040531	0.287302	1031	-0.00536795	0.0061711	0.384385	44273	1.18341	0.236645
itm2a	-0.0991448	0.0946249	0.294988	1050	0.0136795	0.0124795	0.273015	45034	-1.1821	0.237167
pvalb	0.171968	0.159078	0.279932	1051	-0.0180974	0.023472	0.440698	45275	1.182	0.237206
inhbb	-0.10925	0.0954368	0.252633	880	0.00407659	0.0109754	0.710318	37950	-1.17967	0.238131
ssbp1	-0.0497565	0.0501347	0.321256	859	0.00998317	0.00739509	0.177033	37668	-1.17883	0.238467
igfbp6	-0.0599242	0.0572965	0.295868	1047	0.0079902	0.00623671	0.200146	44916	-1.17835	0.238655
a1bg	0.0313978	0.0253012	0.214946	898	0.00128616	0.00361291	0.721851	38862	1.17818	0.238726
dbh	-0.17966	0.157228	0.253483	895	0.00744996	0.0223876	0.739309	38769	-1.17817	0.238729
ltb	-0.0557088	0.0475086	0.241269	893	0.000913131	0.00728654	0.900273	38610	-1.17805	0.238777
smpdl3a	0.120466	0.0972327	0.215644	1052	0.00509853	0.0136099	0.707946	45243	1.17505	0.239974
naga	-0.0871451	0.0834025	0.296377	858	0.0118147	0.0124267	0.341739	37595	-1.17358	0.240565
lep	-0.166528	0.141844	0.240653	1052	0.00154935	0.0204734	0.939677	45128	-1.17279	0.240879
pdcd1lg2	-0.0696979	0.0468147	0.136843	1043	-0.0142896	0.00649287	0.0277546	44888	-1.17234	0.241059
rbp7	0.102	0.0919625	0.267666	893	-0.00679235	0.0130662	0.603177	38629	1.17125	0.241499
cd79b	-0.0906837	0.0763681	0.235315	1060	-0.000596532	0.00929625	0.948836	45599	-1.171	0.241599
il20	0.0985608	0.0758405	0.194034	1042	0.00892685	0.0104077	0.391055	44249	1.1709	0.241639
ephb6	-0.0582163	0.0552116	0.291937	1038	0.00683394	0.00649204	0.292501	44691	-1.17014	0.241946
atp5f1d	-0.0924338	0.0902572	0.306068	865	0.0139143	0.0106863	0.192902	37510	-1.17011	0.241958
nbl1	-0.0514566	0.0471095	0.274963	1052	0.00391641	0.00554411	0.479937	45247	-1.16735	0.243068
sv2a	-0.10036	0.0917988	0.274585	867	0.00785258	0.0129848	0.545349	37741	-1.16718	0.243137
sema4d	-0.0504037	0.0407527	0.21643	1060	-0.00236839	0.00623721	0.704156	45500	-1.16513	0.243965
txnl1	-0.146622	0.142301	0.303129	866	0.020965	0.0210223	0.318637	37472	-1.16505	0.244
app	0.104378	0.0942328	0.268263	1047	-0.0065124	0.0138392	0.637946	45044	1.16428	0.244309
rcc1	0.0671191	0.0800033	0.40172	893	-0.0267377	0.0107425	0.0128161	38610	1.16273	0.24494
b4gat1	-0.0399208	0.034354	0.245484	1047	0.000467978	0.00517988	0.928013	45114	-1.16253	0.245022
cd28	-0.0760893	0.0567927	0.180617	1028	-0.00950241	0.00765639	0.214572	44017	-1.16194	0.245258
lipf	-0.133101	0.101444	0.189841	880	-0.014675	0.0125278	0.241448	37767	-1.1586	0.246617
nme3	0.0455589	0.037818	0.228595	1052	0.00141095	0.0048599	0.771569	45160	1.15786	0.246922
il1rl1	0.0702071	0.0694099	0.312015	1062	-0.0107987	0.00967136	0.264188	45513	1.1559	0.247723
pm20d1	0.289069	0.256647	0.260285	1045	-0.0107289	0.0381792	0.7787	44903	1.15542	0.247918
ahsg	0.0430572	0.0378388	0.255462	900	-0.00113723	0.00565814	0.840707	38840	1.15512	0.24804
serpinf2	0.0284416	0.0197429	0.150054	886	0.00545186	0.00285873	0.0565164	38135	1.15244	0.249142
havcr2	-0.0726309	0.0647663	0.262363	1047	0.00245581	0.00744517	0.741512	45114	-1.15176	0.249418
cdhr5	-0.0563806	0.0570335	0.32311	1052	0.00992348	0.008292	0.231409	45128	-1.15045	0.249958
ecscr	-0.0821575	0.0779722	0.292326	867	0.00838567	0.0107352	0.434727	37546	-1.15037	0.249991
cacnb1	-0.0990544	0.0827043	0.231366	867	-0.00285298	0.0124498	0.818747	37546	-1.15024	0.250046
fxyd5	0.0935524	0.0854145	0.273651	1042	-0.00571885	0.0136628	0.675532	44249	1.14764	0.251117
dxo	0.0806459	0.0631782	0.202117	895	0.00734266	0.00956336	0.442616	38704	1.14719	0.251301
ppy	-0.16161	0.151359	0.285892	1048	0.013663	0.021373	0.522653	45030	-1.14662	0.251539
c2cd2l	0.0685242	0.0554701	0.216991	1022	0.00417485	0.00894681	0.640767	43963	1.14527	0.252096
kir2dl2	-0.185434	0.132398	0.16169	893	-0.0325879	0.0179109	0.0688507	38610	-1.14402	0.252615
sit1	-0.103061	0.0816187	0.206976	1042	-0.00867718	0.0120439	0.471242	44249	-1.14401	0.252619
apoh	-0.0484736	0.0519912	0.351376	1047	0.0115488	0.00744301	0.120757	45114	-1.14282	0.253113
ngf	-0.018192	0.0171565	0.289231	1041	0.00160316	0.00253912	0.527793	44759	-1.14137	0.253718
palm3	-0.130246	0.106329	0.220936	865	-0.00753591	0.0160103	0.637864	37510	-1.14119	0.253789
cxcl14	0.091971	0.0873561	0.292665	1042	-0.00872846	0.0125434	0.48652	44249	1.14104	0.253852
sct	-0.0962085	0.0715717	0.179229	867	-0.0138553	0.00966994	0.151918	37741	-1.14028	0.25417
atp6v1f	0.0936687	0.092113	0.309448	1022	-0.0125266	0.0139753	0.370079	43963	1.13984	0.254354
cxcl1	0.135824	0.129383	0.294059	1046	-0.0132361	0.0195975	0.499429	45020	1.1391	0.254663
cela2a	-0.105798	0.095753	0.269498	897	0.00411425	0.0125913	0.743857	38800	-1.13808	0.255088
tarm1	0.15604	0.11908	0.190416	867	0.0194429	0.0161077	0.22742	37741	1.13675	0.255642
yap1	0.059661	0.0537587	0.267389	895	-0.00176125	0.00586061	0.763779	38704	1.13582	0.25603
kifbp	0.117587	0.121043	0.33155	1043	-0.021203	0.0172848	0.219947	44888	1.1351	0.256331
myom2	-0.0979235	0.0815643	0.23025	865	-0.00461078	0.0104062	0.657711	37510	-1.13484	0.256443
prdx3	0.111818	0.104268	0.283782	1042	-0.00771232	0.0150335	0.607949	44249	1.13465	0.256521
tgoln2	-0.0556274	0.0462333	0.229221	900	-0.00285245	0.00535306	0.594131	38840	-1.13392	0.256829
carhsp1	0.0882179	0.0765447	0.249385	1025	0.00054629	0.0109554	0.96023	44031	1.13381	0.256874
nrxn3	-0.0581966	0.0548787	0.289233	867	0.00458328	0.00736738	0.533877	37741	-1.1338	0.256876
blvrb	0.113872	0.0970575	0.240966	1047	0.00269141	0.0140399	0.84798	45114	1.13371	0.256914
dsg3	-0.0546012	0.0542261	0.314207	1056	0.00736358	0.00704885	0.29619	45328	-1.13318	0.25714
boc	0.040666	0.0356301	0.253996	1030	8.17769e-06	0.00489047	0.998666	44275	1.13051	0.258261
sprr1b	-0.166828	0.143019	0.243741	884	-0.00404607	0.017558	0.817751	38105	-1.1297	0.258603
crim1	0.0401512	0.0381767	0.293171	1053	-0.00322887	0.00416382	0.438073	45311	1.1296	0.258646
map2	-0.0671946	0.0616822	0.276287	895	0.00328138	0.00962734	0.733226	38704	-1.1289	0.258941
ppp1r12b	0.127375	0.10335	0.218104	884	0.00952806	0.0149237	0.523184	38105	1.12857	0.259079
omd	0.0639618	0.0634109	0.313357	1053	-0.00830724	0.00921634	0.367402	45311	1.12784	0.259386
susd2	0.0472959	0.0439297	0.281896	1047	-0.00266705	0.0061666	0.665381	45114	1.1263	0.26004
pik3ip1	-0.0550388	0.0523967	0.293766	1047	0.00430327	0.0056009	0.442303	45114	-1.12614	0.260107
cntf	-0.0443063	0.0475044	0.351247	867	0.00971014	0.00710925	0.171996	37546	-1.12456	0.260776
amy2a	-0.0900609	0.0718837	0.210542	1019	-0.00842753	0.0101294	0.405421	43380	-1.12452	0.260792
egflam	0.0592568	0.0491865	0.228626	893	0.00352872	0.00638132	0.580283	38629	1.12358	0.261192
enoph1	-0.0872615	0.0801716	0.276699	893	0.00361645	0.0115183	0.753542	38610	-1.12202	0.261853
atp6ap2	0.07108	0.0545788	0.193095	1028	0.00912172	0.00845044	0.280399	44017	1.12184	0.26193
il6r	0.0579886	0.0494154	0.240868	1040	0.00200548	0.00710513	0.777747	44853	1.12138	0.262128
prdx5	0.0982174	0.0915191	0.283431	1060	-0.00549753	0.0141293	0.697214	45599	1.11999	0.262718
galnt7	0.0233936	0.0298517	0.43342	1043	-0.0103861	0.00432983	0.0164555	44888	1.11986	0.262772
psmd1	-0.0824016	0.0685171	0.229435	894	-0.00488344	0.0103844	0.638169	38726	-1.11859	0.263313
mag	0.0949293	0.0695698	0.172761	867	0.0164076	0.0098196	0.0947495	37741	1.1176	0.263739
smad3	-0.0775869	0.0706085	0.272139	893	0.00221876	0.0107127	0.835921	38610	-1.11747	0.263795
nudt10	-0.0296199	0.0351978	0.400283	880	0.0101083	0.0054045	0.0614443	37767	-1.11564	0.264578
podxl	0.0227115	0.0217091	0.295723	1043	-0.00174975	0.00316861	0.580805	44888	1.11496	0.264866
rest	-0.0550139	0.0511105	0.282064	862	0.00246441	0.00730363	0.7358	37377	-1.11328	0.265588
yy1	-0.0478543	0.0401714	0.233885	859	-0.00271725	0.00586969	0.643418	37668	-1.11181	0.266222
fis1	0.1073	0.104384	0.304219	1050	-0.0100635	0.0161655	0.533596	45097	1.1111	0.266526
tgfb2	-0.0908752	0.0760518	0.23244	893	-0.00562866	0.0108839	0.605053	38610	-1.1096	0.267173
map2k6	0.149574	0.140737	0.288122	1050	-0.00823361	0.0209491	0.6943	45034	1.10908	0.267397
tdgf1	-0.257783	0.213006	0.226478	1025	-0.0195313	0.0303035	0.51924	44031	-1.10737	0.268134
klrf1	0.0821996	0.0642631	0.201206	859	0.0104687	0.00861904	0.224527	37668	1.1063	0.268597
psmg3	0.0867785	0.0735631	0.238409	1050	0.00460194	0.0108774	0.672244	45034	1.10507	0.269127
krt6c	-0.0612083	0.0636362	0.336396	865	0.00967594	0.008159	0.23566	37510	-1.10486	0.269222
gpr15l	0.110501	0.0946049	0.243109	893	0.00519525	0.0126535	0.681384	38629	1.10329	0.269903
il18bp	-0.0542434	0.0514127	0.291642	1053	0.00282612	0.00637533	0.657558	45299	-1.10159	0.27064
stx3	-0.0539979	0.0539644	0.317282	895	0.00604969	0.00811148	0.455781	38704	-1.10037	0.271173
treh	-0.106474	0.10254	0.299379	897	0.00767603	0.0158042	0.627186	38800	-1.10024	0.271228
penk	-0.0657186	0.0552358	0.234454	880	-0.00460799	0.00629624	0.464256	37950	-1.09924	0.271663
steap4	0.118464	0.101864	0.245164	867	0.00528681	0.0154352	0.731964	37546	1.09853	0.271974
dffa	0.0971316	0.0891904	0.276387	1060	-0.00207208	0.0141537	0.883607	45599	1.09852	0.271977
mcemp1	0.161401	0.125264	0.197923	859	0.0222463	0.0189976	0.241604	37668	1.09834	0.272057
c1r	0.0285241	0.0232831	0.22086	898	0.00257907	0.00399204	0.518248	38862	1.0983	0.272072
tk1	0.048863	0.0551569	0.375918	884	-0.012589	0.00940859	0.180894	38105	1.09827	0.272087
tnfaip8	0.0435895	0.0484248	0.368251	1042	-0.0101883	0.00765404	0.183164	44249	1.09692	0.272675
safb2	-0.0490295	0.0388925	0.20777	894	-0.00593646	0.00579192	0.305391	38726	-1.09592	0.273116
scin	0.12699	0.0956069	0.184447	867	0.0210685	0.015267	0.167592	37546	1.09402	0.273945
ranbp2	-0.0537403	0.0486735	0.269858	867	-0.000147746	0.00693643	0.983006	37546	-1.09005	0.275691
manf	0.191626	0.176584	0.278089	1053	-0.00275005	0.0250052	0.912426	45311	1.08989	0.275763
tbr1	-0.0800922	0.0720584	0.266667	867	-0.00092711	0.00996201	0.925853	37741	-1.08827	0.276474
pdgfa	0.118788	0.103564	0.251642	1064	0.00492913	0.0149383	0.741427	45660	1.08814	0.276533
ckmt1a_ckmt1b	0.122476	0.10104	0.225728	1049	0.011481	0.0140874	0.415087	44946	1.088	0.276595
cep164	0.117269	0.0972063	0.227941	1042	0.010916	0.0131441	0.406268	44249	1.08423	0.278264
ciapin1	0.0771028	0.0858313	0.369229	1052	-0.01703	0.0132396	0.198347	45247	1.0839	0.278409
golm2	0.0258336	0.0345222	0.454436	1060	-0.0119302	0.00483873	0.0136832	45500	1.08331	0.278672
phospho1	-0.0419821	0.0487373	0.389219	1041	0.0112324	0.00625492	0.0725385	44759	-1.08298	0.278817
tubb3	-0.0531415	0.0446855	0.234675	867	-0.00436977	0.00586598	0.456317	37546	-1.08216	0.279181
cda	0.0684554	0.0695699	0.325392	895	-0.00759351	0.01014	0.453941	38729	1.0817	0.279386
cxcl11	0.101929	0.112071	0.363292	1060	-0.0203348	0.0162841	0.211761	45500	1.07961	0.280315
crebzf	-0.0387028	0.0371654	0.297999	862	0.00184813	0.00544889	0.734479	37377	-1.07955	0.280341
psmd9	0.0855681	0.0814223	0.293541	1043	-0.00320031	0.011797	0.786176	44888	1.07896	0.280607
agxt	0.0938883	0.118081	0.426724	1052	-0.034657	0.0161739	0.0321367	45128	1.07855	0.280787
cd33	0.120781	0.117571	0.304517	1052	-0.00727778	0.0167885	0.664654	45247	1.07826	0.280916
vsnl1	0.0456707	0.0566567	0.420403	895	-0.0159286	0.00785113	0.0424819	38704	1.07695	0.281504
wasf3	0.129093	0.119413	0.279925	1025	-0.000831021	0.0175785	0.962294	44031	1.07642	0.281739
mertk	0.0438888	0.0383412	0.252596	1060	0.00223089	0.00526428	0.671729	45599	1.07641	0.281745
tfpi	0.0512534	0.0472739	0.278536	1048	-0.00011228	0.00653594	0.986294	44994	1.07632	0.281786
clta	-0.0650832	0.0656461	0.321712	1030	0.00635778	0.00982902	0.51774	44275	-1.07628	0.281803
hsd17b3	0.0617168	0.0665644	0.354096	865	-0.0107416	0.0101275	0.288862	37510	1.07616	0.281855
csf3r	-0.0439818	0.0467501	0.347081	859	0.00672176	0.00619107	0.27761	37668	-1.07518	0.282294
bhmt2	-0.0328336	0.0373138	0.379142	865	0.00769538	0.00538623	0.153095	37510	-1.07502	0.282364
megf10	0.0471401	0.0590487	0.424862	1051	-0.0168654	0.00825855	0.0411401	45085	1.0735	0.283049
tbc1d5	0.0784634	0.104502	0.452922	1050	-0.0346579	0.0168922	0.0402034	45034	1.06861	0.285245
amigo2	0.035816	0.036644	0.328596	1043	-0.00366665	0.00476123	0.44124	44888	1.06849	0.285301
nhlrc3	0.0509099	0.0494983	0.304	852	-0.00249217	0.00695735	0.720191	37038	1.06836	0.285356
pcdh9	0.0487742	0.0490592	0.320401	893	-0.00414058	0.0070604	0.557576	38629	1.06759	0.285705
rnase3	0.167191	0.161049	0.299446	1047	-0.00654362	0.0235785	0.781379	44912	1.06739	0.285795
pdap1	0.159935	0.139521	0.251973	900	0.00974576	0.0203309	0.631688	38800	1.06521	0.286781
reg3g	-0.0559585	0.0600799	0.351899	893	0.00862128	0.00819477	0.292785	38610	-1.06504	0.28686
ripk4	0.121665	0.0984387	0.216815	865	0.0161413	0.0142162	0.256209	37510	1.06097	0.288703
grsf1	-0.125707	0.115521	0.276826	857	-0.00189896	0.016995	0.911033	37184	-1.06032	0.288998
grpel1	0.0703221	0.084357	0.404684	1043	-0.0199519	0.0126914	0.115938	44888	1.05823	0.289949
lpcat2	0.0507925	0.062511	0.41667	1043	-0.0160035	0.00882301	0.0697093	44888	1.05806	0.290028
elob	0.0545326	0.0517378	0.292171	865	-0.000777115	0.00816715	0.924195	37510	1.05596	0.290985
rab37	0.100491	0.107007	0.347892	1042	-0.0138648	0.0174	0.425555	44249	1.05483	0.291505
anxa11	0.0988844	0.0983988	0.315161	1048	-0.00587607	0.0138822	0.672093	44962	1.05421	0.291786
slc16a1	0.111303	0.077674	0.152178	1025	0.0285045	0.0120857	0.0183519	44031	1.0533	0.292203
txk	-0.112274	0.10846	0.300877	884	0.00309664	0.0158291	0.844902	38105	-1.05256	0.292541
hmgcs1	-0.056109	0.0655238	0.392062	865	0.0134393	0.00913771	0.141367	37510	-1.05125	0.293145
anxa2	0.0894485	0.0992922	0.367915	862	-0.0160097	0.0151543	0.290771	37194	1.04994	0.293745
snrpb2	0.0549034	0.0633631	0.386457	895	-0.012288	0.00964964	0.202878	38704	1.04833	0.294487
ism2	0.0552042	0.0561996	0.326225	897	-0.00445139	0.00895817	0.619257	38800	1.04826	0.294519
idi2	-0.0709638	0.0710532	0.318157	1025	0.00422429	0.00992301	0.670324	44031	-1.04802	0.294628
c1rl	0.0264872	0.0287705	0.357489	897	-0.00398223	0.00420488	0.343619	38793	1.04792	0.294677
prune2	-0.0545649	0.0425923	0.200498	884	-0.00953779	0.00602922	0.113674	38105	-1.04673	0.295225
btn2a1	-0.0500072	0.0476909	0.294618	1053	0.000228114	0.00541621	0.966406	45311	-1.04662	0.295273
mrpl52	0.0317366	0.0336157	0.345386	858	-0.00384421	0.0053594	0.473204	37303	1.04526	0.295904
il1r2	0.0267563	0.0300826	0.373979	1049	-0.00496327	0.00408186	0.224017	45013	1.04484	0.296097
atg16l1	0.119663	0.116787	0.305815	893	-0.00377896	0.0178925	0.83273	38629	1.0448	0.296115
agrp	-0.0727925	0.0776189	0.348552	1060	0.00905639	0.0109246	0.407113	45599	-1.0442	0.296391
bsnd	0.0543341	0.057996	0.349095	862	-0.00667202	0.00713936	0.350032	37377	1.04402	0.296476
acox1	-0.0744318	0.0752128	0.322591	1052	0.00482055	0.0102749	0.63896	45128	-1.04401	0.29648
apol1	0.0934979	0.0740138	0.206828	900	0.0152894	0.0122356	0.211457	38840	1.04253	0.297168
chchd10	0.0823096	0.0721518	0.254267	895	0.00658425	0.00852717	0.44003	38704	1.04227	0.297284
mllt1	-0.0748064	0.0870695	0.390494	862	0.017051	0.014515	0.240116	37377	-1.04063	0.298048
rbks	0.0600813	0.069066	0.384555	1018	-0.0126407	0.0107883	0.241323	44066	1.04032	0.298191
ceacam16	-0.115819	0.117571	0.324845	893	0.00777737	0.0171034	0.649309	38629	-1.0403	0.298202
aspscr1	0.108819	0.094859	0.25162	894	0.00916402	0.0141817	0.518162	38726	1.03902	0.298798
il1rn	0.102377	0.092176	0.266968	1049	0.00574799	0.0128575	0.654839	45023	1.03825	0.299152
myl6b	-0.142557	0.130454	0.274798	867	-0.00565275	0.0193815	0.770551	37741	-1.03805	0.299247
pnlip	-0.106898	0.0979274	0.2753	900	-0.00445713	0.0127975	0.727631	38840	-1.03727	0.29961
ppp1r9b	0.114121	0.13345	0.392658	1060	-0.0258539	0.0200969	0.198288	45599	1.0372	0.299644
defb118	0.0704582	0.0721435	0.329022	867	-0.00538726	0.0120773	0.655553	37546	1.03688	0.29979
pdgfb	0.138747	0.126594	0.273329	1053	0.00618428	0.0178784	0.729414	45311	1.03686	0.2998
grk5	-0.0637722	0.0710341	0.36952	1030	0.0104788	0.0106883	0.326894	44275	-1.03365	0.3013
anxa1	0.0549372	0.0585849	0.348641	872	-0.00633206	0.00932151	0.496955	37732	1.03283	0.301684
nomo1	0.0350303	0.0348043	0.314411	1047	-0.00128974	0.00512438	0.801284	45114	1.03242	0.301875
pbxip1	0.0520985	0.0461226	0.258964	893	0.00406055	0.00628266	0.518082	38629	1.032	0.302073
dnajb1	0.135585	0.125942	0.281922	1043	0.0043356	0.0183814	0.813535	44888	1.03122	0.302438
gipc3	0.153766	0.140626	0.2745	893	0.00744222	0.0204736	0.716232	38629	1.02966	0.303171
ptprr	-0.0762789	0.062292	0.221073	895	-0.0117121	0.00764424	0.125495	38704	-1.0288	0.303573
acadm	-0.0887328	0.0960048	0.355608	884	0.0111484	0.0145752	0.444343	38105	-1.02859	0.303672
cep152	-0.076166	0.0583344	0.192012	862	-0.0154643	0.00895319	0.0841332	37377	-1.02854	0.303697
pxn	0.0888429	0.0792829	0.26273	1025	0.00648781	0.0112173	0.563012	44031	1.02851	0.303711
ctf1	0.11687	0.120251	0.331336	1030	-0.00800618	0.0175849	0.648905	44275	1.02754	0.304168
dlgap5	0.0721145	0.0767008	0.347368	894	-0.00745302	0.0106787	0.485223	38726	1.02747	0.304201
prss22	0.0568788	0.0500681	0.256264	859	0.00491078	0.00731667	0.502112	37668	1.02704	0.304403
lypd3	0.0395412	0.0475977	0.406313	1045	-0.00983962	0.00702213	0.161152	44893	1.02635	0.304725
fgf16	-0.0494222	0.0599423	0.409888	859	0.0129136	0.0098387	0.189351	37668	-1.0262	0.304799
vsig4	-0.0710188	0.0780401	0.363018	1042	0.00952563	0.00883982	0.281226	45052	-1.02553	0.305112
cd200	-0.0477106	0.0416777	0.252574	1050	-0.00461206	0.00549623	0.4014	45034	-1.02522	0.305262
comp	0.0371189	0.050703	0.464284	1033	-0.0153631	0.00706375	0.0296411	44633	1.02519	0.305276
defb4a_defb4b	0.26695	0.22121	0.227799	1032	0.0379823	0.031035	0.221014	44469	1.02503	0.305349
fgfr2	-0.0419379	0.0392731	0.285833	1052	-0.00140948	0.00468562	0.763561	45247	-1.0247	0.305507
ccdc28a	-0.0413478	0.0401776	0.30371	867	0.000280614	0.00616016	0.963667	37741	-1.02414	0.305769
timp4	-0.0674898	0.062452	0.280095	1047	-0.00303153	0.00832534	0.715761	45114	-1.02308	0.306272
il34	-0.0511549	0.0530168	0.334834	1024	0.0036157	0.00753799	0.631469	43958	-1.02279	0.306406
cpq	-0.0541745	0.0506896	0.285473	894	-0.00183723	0.00721128	0.798901	38730	-1.02221	0.30668
rabgap1l	0.0807343	0.0846948	0.340692	1042	-0.00676068	0.0127971	0.597295	44249	1.02147	0.307033
rap1a	-0.102673	0.0959388	0.284833	859	-0.0036392	0.0143591	0.799927	37668	-1.02089	0.307305
ctrl	-0.119655	0.0999557	0.231594	895	-0.016625	0.0140566	0.236927	38704	-1.02071	0.307391
mxra8	-0.0575249	0.0458354	0.209802	880	-0.0102848	0.00663207	0.120967	37950	-1.02002	0.307717
cndp1	0.0771607	0.0733084	0.29279	1053	0.00185714	0.00951737	0.845291	45299	1.01867	0.308361
pcsk9	0.0549145	0.0586683	0.349478	1064	-0.00542591	0.00829661	0.513121	45660	1.01837	0.308503
uso1	0.108939	0.126768	0.39034	1043	-0.02147	0.0189238	0.256569	44888	1.01745	0.308939
klk1	-0.210173	0.187048	0.261431	1041	-0.017955	0.0265629	0.499081	44658	-1.01743	0.30895
ppib	0.126128	0.133553	0.34518	1054	-0.0112226	0.0198775	0.572358	45163	1.01723	0.309044
rasa1	0.047688	0.0472884	0.313477	1025	-0.00091918	0.00689629	0.893968	44031	1.01713	0.309092
asah2	-0.0976761	0.0833309	0.241407	1041	-0.0124005	0.0111582	0.266428	44759	-1.01428	0.310447
bpifb2	-0.0874332	0.0924318	0.344444	898	0.00738129	0.0143885	0.607956	38727	-1.01357	0.310787
aprt	0.0749389	0.0681829	0.271986	1039	0.00509563	0.00997234	0.60937	44684	1.01357	0.310789
bcl7a	0.0805548	0.0912489	0.37759	862	-0.0128952	0.0133584	0.334391	37377	1.01332	0.310907
siae	0.0491668	0.0639975	0.442506	1052	-0.0164198	0.00974017	0.0918443	45165	1.01316	0.310982
rabep1	0.108189	0.105236	0.304204	880	0.000422234	0.016546	0.979641	37950	1.01162	0.311718
lsp1	0.0621465	0.0565716	0.272219	1050	0.00425084	0.00866066	0.623555	45034	1.01162	0.311721
pigr	-0.0636404	0.0600626	0.289591	1027	-0.0023401	0.0081174	0.773132	44543	-1.01141	0.311819
ccl25	0.0777875	0.0730795	0.287381	1060	0.00320508	0.0102217	0.753859	45599	1.01073	0.312148
lrtm2	-0.0507854	0.0428829	0.236619	894	-0.00707739	0.00563133	0.208838	38726	-1.01056	0.312226
pxdnl	0.109059	0.0836	0.192391	893	0.0237183	0.0119719	0.04758	38610	1.01051	0.312251
il5	0.18102	0.197045	0.35848	1042	-0.0202943	0.0295691	0.492506	44249	1.01035	0.312326
rasgrf1	-0.0351016	0.0576858	0.54302	862	0.0239011	0.00916039	0.0090795	37377	-1.01017	0.312413
kcnip4	0.101464	0.0669981	0.130225	1025	0.0330504	0.0104957	0.00163967	44031	1.00883	0.313057
scgb3a1	0.0401194	0.0419524	0.339182	880	-0.00255518	0.0054962	0.642007	37950	1.00859	0.313169
pcdhb15	-0.0783412	0.0607556	0.197578	893	-0.0165327	0.0082516	0.0451231	38610	-1.00808	0.313418
hebp1	0.0805852	0.070385	0.252509	1030	0.00876887	0.0112692	0.436497	44275	1.0075	0.313692
tshb	-0.0997706	0.112411	0.374985	1052	0.0146132	0.0160663	0.363063	45128	-1.00731	0.313784
b3gat3	-0.0264413	0.029063	0.363186	865	0.00314557	0.00426287	0.46058	37510	-1.00725	0.313815
tpmt	0.102756	0.101927	0.313631	1028	-0.000935896	0.0153638	0.951427	44017	1.00595	0.314441
gsta1	0.0819882	0.126623	0.517451	1049	-0.0467228	0.0188056	0.0129762	45057	1.00546	0.314674
bank1	0.135999	0.151605	0.369892	1050	-0.018074	0.0224128	0.420009	45034	1.00535	0.314727
ptpn6	0.126324	0.131164	0.335719	1053	-0.00684387	0.0185951	0.712841	45235	1.00523	0.314788
prr5	-0.0521581	0.0649507	0.422174	859	0.0137721	0.00965709	0.153843	37668	-1.00404	0.315357
coq7	0.0533607	0.0568105	0.347849	880	-0.00443224	0.00936825	0.636135	37767	1.00374	0.315505
mink1	0.135769	0.130173	0.297237	895	0.00397002	0.0193219	0.837208	38704	1.00152	0.316576
fmnl1	0.0702489	0.0900718	0.435618	1025	-0.0208963	0.0137095	0.12746	44031	1.0004	0.317119
itga6	0.0639501	0.0683637	0.349778	1050	-0.00524528	0.0109413	0.631655	45034	0.999447	0.317578
rgl2	-0.0552475	0.0801147	0.490625	884	0.0259047	0.0133117	0.0516602	38105	-0.99925	0.317674
egfr	0.0249626	0.023974	0.298004	1064	0.000778183	0.00339483	0.818694	45660	0.998811	0.317886
gpr37	-0.0932526	0.109378	0.394097	1030	0.0167308	0.0138729	0.227821	44275	-0.997541	0.318502
cd99	-0.0297869	0.0316165	0.346345	1047	0.00196552	0.00406136	0.62842	45114	-0.996111	0.319196
cetn3	0.10715	0.10826	0.322565	893	-0.0017636	0.0161613	0.913104	38629	0.995017	0.319728
il6	-0.127635	0.118586	0.282038	1043	-0.00864654	0.0161755	0.592967	44888	-0.994191	0.32013
dync1h1	-0.0706006	0.0720206	0.327214	893	0.00166266	0.00987109	0.86624	38610	-0.994075	0.320186
vnn2	0.0736724	0.0709808	0.299549	1043	0.00257341	0.00966064	0.789947	44888	0.992514	0.320947
ighmbp2	-0.077757	0.0820742	0.343702	865	0.00452422	0.0119416	0.704793	37510	-0.992076	0.32116
clec4a	0.0427731	0.0504934	0.397131	1050	-0.00778871	0.00725529	0.283043	45034	0.991176	0.321599
tfpi2	0.0458077	0.051714	0.375935	1050	-0.00602416	0.00806571	0.455137	45108	0.990306	0.322025
hdgfl2	0.0730455	0.0869969	0.401339	895	-0.0140894	0.0135573	0.298696	38704	0.989642	0.322349
bloc1s3	0.0510824	0.0548587	0.352023	895	-0.0037897	0.0085341	0.656998	38704	0.988355	0.322979
adam8	0.043113	0.0429163	0.315328	1059	0.000306265	0.00603319	0.959514	45424	0.987734	0.323283
tmem106a	-0.0986046	0.0966145	0.307723	893	-0.00210929	0.0146612	0.885605	38610	-0.987461	0.323416
clec11a	0.06089	0.0737419	0.409154	1044	-0.0125597	0.00991664	0.205332	45046	0.987151	0.323568
dcdc2c	0.0798183	0.0865665	0.356764	862	-0.00653005	0.0131212	0.618719	37377	0.986216	0.324027
tctn3	0.0502377	0.0447575	0.261975	900	0.00571262	0.00633191	0.366958	38800	0.985	0.324624
ttn	-0.100024	0.0997652	0.316337	865	-0.000815045	0.0143826	0.954809	37510	-0.984253	0.324991
tp53bp1	0.122076	0.121227	0.314218	859	0.00140791	0.0183471	0.938833	37668	0.984184	0.325025
tnfsf10	-0.0375015	0.0374271	0.31658	1060	-0.000298869	0.00542981	0.956105	45599	-0.983703	0.325262
cbs	0.0606782	0.0743252	0.414501	880	-0.0131438	0.0107007	0.219337	37767	0.983093	0.325562
bcr	0.105862	0.128041	0.408549	1050	-0.0214125	0.0192335	0.265588	45034	0.982987	0.325614
mdga1	-0.100872	0.0989096	0.308041	1041	-0.00279464	0.014532	0.847501	44759	-0.981055	0.326565
notch1	0.0184183	0.0230337	0.424108	1064	-0.00440112	0.003254	0.176214	45660	0.980956	0.326615
f12	0.0665501	0.0573903	0.24652	898	0.00971644	0.00857105	0.256955	38862	0.979438	0.327364
scamp3	0.0948725	0.117876	0.421091	1043	-0.0218448	0.0179709	0.224156	44888	0.978859	0.32765
lgals4	0.0780942	0.0904306	0.388015	1051	-0.0111122	0.0114693	0.332617	45085	0.978624	0.327766
rad23b	0.0662692	0.0637315	0.29867	1028	0.00323414	0.00973073	0.739616	44017	0.977741	0.328202
gipc2	0.0437569	0.0523432	0.403401	895	-0.0077217	0.00618632	0.21197	38704	0.976684	0.328726
bcl7b	-0.0600223	0.0649219	0.355462	893	0.00396708	0.0095185	0.676844	38610	-0.975209	0.329456
ampd3	0.108451	0.107197	0.311957	895	0.00298467	0.0151401	0.843721	38704	0.974188	0.329963
hip1	-0.0456848	0.0461438	0.322426	865	-0.000325165	0.00714482	0.963701	37510	-0.971431	0.331334
abo	-0.225497	0.202918	0.26675	900	-0.0268135	0.0298501	0.369046	38840	-0.968706	0.332692
itga2	0.0390201	0.0546668	0.475553	880	-0.0142687	0.00707783	0.04381	37950	0.966724	0.333682
clic5	0.0378954	0.0444537	0.394191	867	-0.00551703	0.00659307	0.402714	37741	0.966009	0.33404
chi3l1	0.122729	0.125501	0.328348	1030	0.000503868	0.0164646	0.975586	44123	0.965624	0.334232
aarsd1	0.0768199	0.0807992	0.341952	1043	-0.00181952	0.0117719	0.877165	44888	0.963102	0.335496
tprkb	-0.0679833	0.0839335	0.418184	862	0.0138335	0.0135069	0.305757	37377	-0.9624	0.335849
glyr1	0.0727902	0.077059	0.345118	893	-0.00226713	0.012637	0.857621	38610	0.961185	0.336459
arhgap5	-0.118336	0.119911	0.323987	862	-0.00216306	0.0159217	0.891936	37377	-0.960397	0.336855
dapp1	0.182797	0.181091	0.313007	1050	0.00722079	0.0250709	0.773337	45034	0.960386	0.336861
gopc	0.123697	0.143459	0.388749	1050	-0.0150988	0.0212037	0.476416	45034	0.957098	0.338518
plxna4	0.0966934	0.116739	0.407699	1050	-0.0161867	0.0169828	0.340535	45034	0.956867	0.338634
cd86	0.0367854	0.0446095	0.409815	893	-0.00626329	0.00599683	0.296292	38629	0.956409	0.338866
fgf7	-0.135412	0.111239	0.223826	862	-0.0278746	0.0165403	0.0919484	37377	-0.956204	0.338969
nub1	0.0901864	0.1119	0.420451	1050	-0.0179081	0.0175806	0.308386	45034	0.954288	0.339938
hmox1	0.0648642	0.0673452	0.335692	1040	-7.40572e-05	0.00991834	0.994043	44627	0.95397	0.340099
cdh5	0.027796	0.0439068	0.526827	1064	-0.0143702	0.00617346	0.0199305	45660	0.951001	0.341604
clec4d	-0.0771063	0.0970021	0.426856	1050	0.0159508	0.0130396	0.22124	45034	-0.950779	0.341717
tcn2	-0.0427899	0.0417813	0.306003	1064	-0.00268333	0.00623129	0.666745	45590	-0.949416	0.342409
arsb	0.0656904	0.0782577	0.401432	1043	-0.00940151	0.0115433	0.415388	44888	0.949276	0.34248
m6pr	-0.0538038	0.0488964	0.271477	880	-0.00673888	0.00836029	0.420214	37767	-0.948775	0.342735
msr1	-0.0665311	0.0709672	0.348721	1060	0.00125787	0.00976114	0.897465	45500	-0.946306	0.343993
cdc25a	0.0590929	0.058878	0.315831	862	0.0029377	0.00844307	0.727885	37377	0.944098	0.34512
mmp8	0.112687	0.112371	0.316183	1059	0.00562606	0.0155758	0.717947	45424	0.94372	0.345313
txlna	0.0980448	0.121265	0.418979	1041	-0.0176725	0.0187362	0.345569	44759	0.94306	0.34565
ptprh	-0.069424	0.0743053	0.350399	893	0.00126864	0.0101056	0.900098	38629	-0.942702	0.345833
lrp2bp	-0.115729	0.126233	0.359511	867	0.00427825	0.0173685	0.805434	37741	-0.941806	0.346292
cd101	0.0590088	0.0622993	0.343804	893	-0.000270422	0.00912547	0.976359	38629	0.941476	0.346461
il15	-0.049744	0.0480953	0.301245	1050	-0.00409261	0.00686685	0.551182	45034	-0.939657	0.347394
ep300	-0.0422505	0.044061	0.337876	859	-0.00042785	0.00638631	0.946586	37668	-0.939383	0.347534
nt5c3a	0.111389	0.123607	0.367716	1048	-0.00597036	0.0182531	0.743603	44962	0.939267	0.347593
elac1	0.116857	0.119322	0.327678	894	0.00357819	0.0177345	0.840102	38726	0.939039	0.347711
ppt1	-0.108313	0.107169	0.312457	867	-0.00672776	0.016015	0.674422	37741	-0.937486	0.348509
ank2	0.103467	0.0913655	0.257761	865	0.0166997	0.0149723	0.264696	37510	0.93717	0.348671
ccer2	-0.110488	0.109917	0.31508	880	-0.00680489	0.0127926	0.594771	37767	-0.936963	0.348777
c5	0.0199651	0.0220709	0.365926	898	-0.00091378	0.00312464	0.769949	38862	0.936654	0.348937
b4galt1	-0.0418454	0.0453901	0.35679	1053	0.000994455	0.00570747	0.86168	45311	-0.936442	0.349046
eno2	0.0758286	0.0896984	0.398094	1060	-0.0090901	0.0136531	0.505548	45500	0.935934	0.349307
chmp1a	0.115002	0.108556	0.289676	1041	0.0122778	0.0163665	0.453148	44759	0.935699	0.349428
samd9l	0.076397	0.0951977	0.422441	1050	-0.0138231	0.0153225	0.366984	45034	0.935671	0.349442
inhbc	-0.0508441	0.0608531	0.403616	1047	0.00668048	0.00946343	0.480238	45114	-0.934074	0.350266
paxx	0.0592037	0.0601704	0.325419	880	0.00237489	0.0097755	0.808051	37950	0.932243	0.351211
slk	0.0822406	0.100787	0.41473	884	-0.0129492	0.0164648	0.431593	38105	0.93211	0.35128
vcan	-0.0504641	0.045266	0.265175	1060	-0.00788847	0.00620895	0.203913	45500	-0.93184	0.351419
dnaja2	0.0906708	0.114213	0.427447	1058	-0.0167711	0.0172588	0.331184	45455	0.930155	0.352291
il20rb	0.061136	0.0588832	0.299443	859	0.00577007	0.00874765	0.509506	37668	0.93006	0.35234
procr	-0.0508014	0.047557	0.28572	865	-0.00605795	0.00733481	0.408856	37510	-0.929844	0.352452
pdcd5	0.0809435	0.0844433	0.338003	1060	0.00165253	0.012339	0.893461	45500	0.929118	0.352828
bag3	-0.0518198	0.0610182	0.395937	1040	0.0054027	0.00849063	0.524576	44682	-0.928846	0.352969
dbnl	0.113757	0.129879	0.381301	1053	-0.00799892	0.0194381	0.680702	45311	0.927133	0.353857
cd274	-0.0477582	0.0528787	0.366649	1041	0.00170142	0.00705158	0.809337	44759	-0.927132	0.353858
cntnap4	-0.137836	0.152633	0.366749	867	0.00499818	0.0219127	0.819573	37741	-0.926304	0.354288
ccdc80	0.0515692	0.0585257	0.378445	1052	-0.00306712	0.00747215	0.681461	45128	0.926028	0.354432
tacc3	0.130761	0.162165	0.420228	1043	-0.0208907	0.0244197	0.392287	44888	0.924743	0.355099
pdia5	-0.0779782	0.0864566	0.367345	862	0.00280919	0.0126238	0.823902	37377	-0.924623	0.355162
pth1r	0.0489062	0.0484413	0.312922	1050	0.00355065	0.00787362	0.652024	45034	0.924171	0.355397
stx8	0.0535399	0.064674	0.407949	1050	-0.0069864	0.0103337	0.498994	45034	0.924144	0.355411
hnf1a	-0.0767046	0.09542	0.421698	867	0.0125221	0.015051	0.405427	37741	-0.923674	0.355656
igsf8	-0.0455293	0.0478559	0.341629	1052	-0.000990422	0.00638627	0.876754	45128	-0.92251	0.356263
ctsd	0.0548839	0.0617346	0.374206	981	-0.00261038	0.00880074	0.766766	42170	0.921992	0.356533
fnta	0.0400876	0.0457385	0.381022	893	-0.00253047	0.00737352	0.731462	38610	0.9199	0.357625
ggt5	-0.0425505	0.0397939	0.285196	1041	-0.0056883	0.00474061	0.230182	44759	-0.919824	0.357665
hspa2	0.0415392	0.0494196	0.400832	893	-0.00436036	0.00706001	0.536834	38610	0.919437	0.357867
smad5	0.025906	0.0297526	0.384111	1043	-0.00171435	0.00430623	0.690552	44888	0.918763	0.35822
palm	0.0587027	0.0557918	0.293008	885	0.0071081	0.00650751	0.274712	38424	0.918544	0.358334
fgf21	-0.145243	0.192913	0.451683	1057	0.0334131	0.0260531	0.199674	45412	-0.917764	0.358742
efna1	-0.0400645	0.0524468	0.445096	1046	0.00827686	0.00583281	0.155901	45037	-0.916074	0.359628
stip1	0.076542	0.0909279	0.400101	1044	-0.00754435	0.0138474	0.585881	45040	0.914217	0.360603
hif1a	0.0745004	0.0827893	0.368438	859	-0.00213562	0.013632	0.875512	37668	0.913376	0.361045
c19orf12	0.0608357	0.0833002	0.465363	1025	-0.0161701	0.0138308	0.242355	44031	0.911953	0.361794
trem2	-0.0664963	0.079806	0.404908	1051	0.00683416	0.0111335	0.539324	45085	-0.910046	0.362798
pdia2	0.0438068	0.0513942	0.394247	862	-0.0035867	0.00848268	0.672424	37377	0.909848	0.362903
tinagl1	-0.0297301	0.035111	0.397331	1046	0.00246278	0.00461651	0.59371	44990	-0.909065	0.363316
tcl1b	0.0900621	0.112859	0.425054	1030	-0.0134935	0.0165429	0.414696	44275	0.907862	0.363951
psmd5	0.0775297	0.0808913	0.338108	867	0.00361863	0.0114341	0.751642	37741	0.904715	0.365616
ica1	0.0809645	0.105181	0.441615	1042	-0.0153762	0.016736	0.358232	44249	0.904574	0.365691
entr1	0.0624408	0.0852983	0.464347	880	-0.0155493	0.0125915	0.216875	37767	0.90452	0.36572
col15a1	-0.0398295	0.0492924	0.419291	897	0.00504755	0.00570311	0.376135	38800	-0.904394	0.365787
smc3	-0.0750687	0.0808044	0.353141	862	-0.00133038	0.0112389	0.905772	37377	-0.903853	0.366074
siglec5	0.17246	0.183732	0.348129	1047	0.00503598	0.0238734	0.832931	45114	0.903643	0.366185
sbsn	-0.0404344	0.0550094	0.462505	894	0.00965777	0.00712729	0.175412	38725	-0.903064	0.366492
clec10a	-0.0395444	0.0538552	0.462948	1041	0.00948626	0.00748141	0.204813	44759	-0.901758	0.367186
znrf4	0.0822374	0.080099	0.304843	893	0.00934173	0.0112926	0.408103	38610	0.901158	0.367504
dkk1	0.0769307	0.0853103	0.367382	1060	-0.000708604	0.0123093	0.954094	45500	0.900753	0.36772
sema4c	0.0355733	0.042471	0.402454	1043	-0.00302795	0.00578327	0.60058	44888	0.900574	0.367815
hmmr	-0.0693051	0.0662908	0.296102	858	-0.00891829	0.010154	0.379785	37303	-0.900436	0.367888
glrx5	0.124817	0.120104	0.298978	880	0.0154024	0.0185099	0.405348	37950	0.900372	0.367922
angptl2	0.0487575	0.0599235	0.416024	1048	-0.0057369	0.0086723	0.508282	45167	0.900024	0.368108
epcam	0.128324	0.132887	0.334433	1052	0.00746411	0.0202719	0.712726	45083	0.899098	0.3686
sparcl1	-0.034277	0.0386762	0.375685	1049	0.00086512	0.00569787	0.87932	45152	-0.89892	0.368695
pnma2	0.0351435	0.057258	0.539526	867	-0.0169439	0.00922004	0.0661108	37546	0.898127	0.369118
enpep	-0.0684978	0.063881	0.283899	865	-0.0105374	0.00922492	0.253345	37510	-0.898003	0.369184
robo4	-0.0229323	0.0265585	0.38812	880	0.00113101	0.00367693	0.758391	37767	-0.897487	0.369459
dock9	-0.147838	0.166899	0.375976	867	0.00334173	0.0247473	0.892586	37546	-0.89602	0.370242
mnda	0.108251	0.144561	0.454132	1049	-0.0224489	0.0214225	0.294686	45057	0.894347	0.371136
mep1a	0.114441	0.103328	0.268356	893	0.0211292	0.0147644	0.152412	38629	0.893984	0.37133
rln1	0.0788819	0.0788156	0.317176	894	0.00740968	0.0142439	0.602926	38726	0.892372	0.372193
sfrp1	0.0665931	0.0719526	0.354914	1039	0.00187196	0.00919764	0.838724	44602	0.892238	0.372266
mfap5	-0.0536917	0.0662385	0.417789	1064	0.00591885	0.00894226	0.508041	45660	-0.891847	0.372475
gabarapl1	-0.0822316	0.0987332	0.405146	884	0.00667255	0.0137735	0.628071	38105	-0.891813	0.372493
milr1	-0.0783482	0.0798439	0.32669	1042	-0.00652471	0.0105619	0.536737	44249	-0.891781	0.372511
cyb5r2	0.0764949	0.0761246	0.315239	881	0.00783204	0.0115931	0.499312	38217	0.891699	0.372554
mzb1	-0.0712622	0.0849528	0.401748	1052	0.00510686	0.010945	0.640794	45236	-0.89159	0.372613
tbcb	0.116208	0.141591	0.411986	1041	-0.0113548	0.0209305	0.587475	44759	0.891245	0.372798
plscr3	0.0773576	0.0777558	0.320066	893	0.00725981	0.0123517	0.556698	38639	0.890348	0.373279
srpk2	0.0717144	0.110684	0.517177	1050	-0.0280623	0.0177416	0.11372	45034	0.890097	0.373414
fgfbp2	0.0706169	0.0758058	0.351821	897	0.00255223	0.0103644	0.805489	38800	0.889606	0.373678
tex33	-0.0478231	0.057446	0.405359	884	0.00378957	0.00825225	0.646081	38105	-0.889327	0.373827
s100a4	0.0723753	0.0833304	0.385301	1052	-0.00248338	0.0119357	0.83518	45247	0.88926	0.373863
gne	0.0618669	0.0936509	0.50901	1028	-0.0220482	0.0136915	0.107328	44017	0.886617	0.375285
s100a13	0.0588769	0.0520796	0.258576	859	0.0122694	0.00737006	0.0959689	37668	0.886099	0.375564
map1lc3a	-0.0435542	0.0427562	0.308648	867	-0.00531707	0.00658985	0.419754	37546	-0.883871	0.376766
nudt15	-0.0728526	0.0791814	0.357793	865	-0.00232471	0.0107743	0.829173	37510	-0.88258	0.377463
scn2b	-0.0240973	0.043902	0.583224	867	0.0149849	0.00597354	0.0121269	37741	-0.882088	0.377729
nectin4	-0.0525436	0.0579942	0.365137	1052	-0.00124422	0.00646405	0.847365	45247	-0.879116	0.379338
tnfrsf1b	-0.0587341	0.0679114	0.387313	1047	0.00133872	0.00770031	0.861982	45114	-0.878944	0.379431
lgals3bp	0.0395042	0.0424028	0.351774	898	0.00178702	0.00661205	0.786957	38862	0.878876	0.379468
ermap	0.0739398	0.0700232	0.291297	859	0.011904	0.00949682	0.210041	37668	0.877895	0.380001
ces3	-0.0832114	0.104725	0.427046	1043	0.00952991	0.0147547	0.518354	44888	-0.876908	0.380537
gp1ba	0.0341033	0.0466302	0.464727	1042	-0.00719976	0.00676385	0.287132	44919	0.876584	0.380713
art5	0.0575421	0.0839408	0.493208	867	-0.0168734	0.0131743	0.200279	37546	0.875802	0.381137
lama4	0.0430704	0.0497792	0.387111	1053	-0.000930283	0.00696818	0.893795	45311	0.875383	0.381366
tnfrsf11a	-0.052478	0.0729222	0.471903	1060	0.0116701	0.0082803	0.15873	45599	-0.874062	0.382084
c2orf69	-0.0701454	0.0763178	0.358289	867	-0.00260069	0.0121974	0.83116	37741	-0.873953	0.382144
ctsc	0.0550145	0.0654991	0.401142	1045	-0.00275165	0.00908942	0.762096	45024	0.873567	0.382354
gimap8	0.0706224	0.0785018	0.368571	862	0.00143877	0.0107342	0.893374	37377	0.873175	0.382568
crygd	-0.101782	0.134315	0.44878	895	0.0167894	0.02007	0.402856	38704	-0.873092	0.382613
megf11	-0.042831	0.0443915	0.334892	865	-0.00363648	0.00683221	0.594553	37510	-0.872655	0.382851
sdk2	0.0506022	0.0605725	0.403722	880	-0.00268168	0.00794384	0.735682	37950	0.872202	0.383098
fcar	0.0664547	0.0717469	0.354536	1050	0.00330634	0.00996799	0.740121	45034	0.871781	0.383328
ass1	0.0784896	0.119033	0.50982	865	-0.0261687	0.0164727	0.112158	37510	0.870937	0.383789
serpinf1	0.0373735	0.0449978	0.406446	887	-0.00206963	0.0060086	0.730514	38275	0.868844	0.384933
cpb2	0.0379051	0.0329831	0.25077	897	0.00897099	0.00471658	0.0571772	38788	0.868406	0.385172
fkbp5	0.0899319	0.130713	0.4916	1041	-0.0247923	0.0197342	0.209008	44759	0.867846	0.385479
cd6	-0.0493526	0.0758306	0.5153	1058	0.0171381	0.0111578	0.124551	45526	-0.867491	0.385673
ecm1	0.0452661	0.0513151	0.377957	872	0.000266014	0.00766501	0.972315	37797	0.867313	0.38577
cc2d1a	0.0671739	0.101484	0.508171	1041	-0.0217786	0.0158231	0.168711	44759	0.866057	0.386459
c1qbp	0.103068	0.105559	0.329133	894	0.0109652	0.0141374	0.437979	38726	0.864798	0.387149
hbegf	0.0842661	0.107275	0.432327	1055	-0.00941668	0.0152384	0.536606	45346	0.864619	0.387248
add1	0.101532	0.104855	0.333161	880	0.00999453	0.0149713	0.504407	37950	0.86422	0.387467
adam12	0.0557016	0.0591405	0.346534	859	0.00419642	0.00747374	0.574468	37668	0.864024	0.387575
lilrb4	-0.0554841	0.0738263	0.452493	1042	0.0088114	0.00933574	0.345259	44249	-0.86402	0.387577
sh3bgrl2	0.0796647	0.0928679	0.391226	867	-0.00125474	0.0126869	0.921218	37546	0.86332	0.387961
morf4l2	-0.0476692	0.058012	0.411469	862	0.00287335	0.00789067	0.715752	37377	-0.863295	0.387976
lat	0.100359	0.110113	0.362288	1060	0.00443933	0.0158407	0.779289	45599	0.862218	0.388568
eif4g1	0.101927	0.138563	0.462137	1060	-0.0188201	0.02099	0.369925	45599	0.861595	0.38891
casp10	0.0712141	0.103408	0.491185	1025	-0.0187123	0.0150425	0.21352	44031	0.860573	0.389473
hdac9	-0.0960618	0.0993461	0.333845	867	-0.00980296	0.0134463	0.46598	37546	-0.86042	0.389557
gpr101	0.104943	0.0867439	0.226686	867	0.0295567	0.0126249	0.0192297	37546	0.860006	0.389785
jun	0.0914411	0.0793969	0.249711	1042	0.022582	0.010576	0.0327493	44249	0.859684	0.389963
azu1	0.0821571	0.115445	0.47684	1023	-0.0180814	0.0165825	0.275546	43779	0.85946	0.390087
il4	0.0978539	0.137226	0.475952	1042	-0.0211067	0.0188291	0.26231	44249	0.85885	0.390423
cd164	-0.0417461	0.0435351	0.337828	1047	-0.00404988	0.00559851	0.469447	45114	-0.858809	0.390446
defb104a_defb104b	-0.0560665	0.0814056	0.491178	867	0.0145432	0.0116269	0.211006	37546	-0.858669	0.390523
grhpr	0.0863996	0.0877667	0.325173	900	0.0101771	0.0133547	0.446031	38800	0.858586	0.390569
ubac1	0.0418221	0.0502357	0.405308	1043	-0.00175903	0.00732275	0.810165	44888	0.858461	0.390638
tnip1	0.08615	0.121923	0.480004	895	-0.0197467	0.0188373	0.294518	38704	0.85837	0.390688
atp5if1	0.133182	0.15744	0.397792	1053	-0.00316374	0.0229859	0.890527	45311	0.856927	0.391485
egf	0.140187	0.150137	0.35066	1048	0.010262	0.0215258	0.633556	45015	0.856617	0.391656
plpbp	0.0786838	0.090558	0.385113	1052	0.000290016	0.0142385	0.98375	45128	0.855169	0.392458
ntf4	-0.0392374	0.0614075	0.522987	1028	0.0137191	0.00807422	0.0893031	44017	-0.855019	0.39254
itgb6	0.0359335	0.047066	0.445356	1042	-0.00466459	0.00630357	0.459309	44249	0.854944	0.392582
pear1	-0.0360312	0.0333184	0.279757	1064	-0.00726795	0.00467327	0.119901	45660	-0.854913	0.392599
chp1	-0.086122	0.100085	0.389759	867	0.000404433	0.0153554	0.978988	37546	-0.854531	0.392811
pithd1	0.0800187	0.109877	0.466657	859	-0.0148618	0.01675	0.374939	37316	0.853651	0.393298
il11	0.0646141	0.0923434	0.484262	1042	-0.015003	0.013163	0.25438	44249	0.853557	0.393351
sirt2	0.0980842	0.122808	0.424658	1043	-0.00787494	0.0185415	0.671043	44888	0.853136	0.393584
thop1	0.0363348	0.0453576	0.42327	1047	-0.00275774	0.00666061	0.678849	44913	0.852731	0.393809
clec7a	-0.0586067	0.0842567	0.486849	1060	0.0139252	0.0123445	0.259305	45599	-0.851752	0.394352
lcat	-0.0254255	0.0349892	0.46762	900	0.00465173	0.00482295	0.334801	38840	-0.851563	0.394457
hsp90b1	-0.052341	0.100013	0.600851	1022	0.0336529	0.0139842	0.0161107	43812	-0.851543	0.394468
hdgf	0.131673	0.132195	0.319454	1059	0.0178783	0.0195829	0.36127	45414	0.851516	0.394483
tbcc	0.0858632	0.112291	0.444656	1041	-0.0106252	0.0169655	0.53113	44759	0.849626	0.395533
lrtm1	0.0463778	0.0554348	0.403039	867	-0.00127021	0.00872506	0.884252	37741	0.849079	0.395838
bglap	-0.134057	0.153071	0.381384	897	-0.00334082	0.0176715	0.850053	38800	-0.848323	0.396258
dcun1d1	-0.0797384	0.107221	0.457272	867	0.0121449	0.0158968	0.44488	37546	-0.847685	0.396613
cstb	-0.0519933	0.0658051	0.429642	1051	0.00430425	0.00927361	0.64255	44484	-0.847149	0.396912
maea	0.0560014	0.0514681	0.276817	1028	0.0118429	0.00826734	0.152011	44017	0.847118	0.396929
btc	-0.0933457	0.098423	0.343143	1028	-0.00895842	0.0155091	0.56352	44017	-0.846943	0.397027
gtf2ird1	0.0860252	0.0987406	0.383869	884	0.00146496	0.0148894	0.921624	38105	0.846815	0.397098
adgrd1	0.0579997	0.0591662	0.327216	880	0.0074357	0.00819282	0.364102	37950	0.846533	0.397256
eps8l2	0.031824	0.0470469	0.498915	1058	-0.00834014	0.00642384	0.194187	45406	0.845856	0.397633
lrrfip1	0.0458888	0.0650691	0.480851	893	-0.00982712	0.0103693	0.343279	38610	0.845588	0.397782
obp2b	0.0674095	0.0914801	0.461365	1040	-0.0106873	0.0129161	0.407991	44607	0.845319	0.397933
glod4	0.0420798	0.0507312	0.40703	1050	-0.00121646	0.00750773	0.871285	45021	0.84425	0.39853
htra2	0.0602205	0.082827	0.467349	1052	-0.0105068	0.0128388	0.413152	45247	0.843839	0.39876
plekho1	0.0707893	0.0956637	0.459507	895	-0.0107693	0.0146523	0.462349	38704	0.842728	0.399381
igfbp7	0.0393352	0.05965	0.509761	1064	-0.0111687	0.00621981	0.0725543	45660	0.842104	0.399729
fkbp14	0.122588	0.139756	0.38064	894	0.00361819	0.0207029	0.861264	38726	0.842075	0.399746
sord	0.059043	0.097597	0.545332	1055	-0.0238537	0.014479	0.0994681	45269	0.840182	0.400806
gbp2	0.0614614	0.083779	0.46335	1042	-0.00963858	0.0124302	0.438096	44249	0.839471	0.401205
mmp1	0.114052	0.1282	0.373872	1010	0.00541512	0.019136	0.777193	43493	0.838116	0.401966
tada3	0.057929	0.0566674	0.306934	893	0.00994403	0.00822794	0.226836	38610	0.837996	0.402033
mthfsd	0.14593	0.153615	0.342388	884	0.0157772	0.0236787	0.505221	38105	0.837376	0.402381
mtss1	0.140805	0.157848	0.372621	893	0.00733715	0.0234909	0.754784	38629	0.836333	0.402968
met	0.0169286	0.0294827	0.565965	1051	-0.00792826	0.0042008	0.0591235	45221	0.834669	0.403904
cdh22	-0.0318075	0.042023	0.449309	884	0.00359286	0.00592376	0.544175	38105	-0.834156	0.404193
trim25	0.118911	0.145118	0.412771	893	-0.00361418	0.0228435	0.874288	38629	0.834047	0.404254
clec1a	-0.0322828	0.0573695	0.57375	1030	0.0158856	0.00681388	0.0197393	44275	-0.833756	0.404419
rnase6	-0.0573287	0.0658583	0.384272	888	-0.00216611	0.00643604	0.73645	38567	-0.833623	0.404493
itih5	-0.0584401	0.0683465	0.39275	893	-0.000965646	0.00926907	0.917028	38610	-0.8333	0.404675
fndc1	0.0655765	0.0710724	0.356428	895	0.00586652	0.00985633	0.551711	38704	0.832165	0.405316
slc4a1	0.0608266	0.06667	0.361829	897	0.00472871	0.00999193	0.636035	38800	0.832132	0.405334
mmp10	0.0533666	0.087744	0.543182	1046	-0.0201485	0.0124315	0.105075	45013	0.829552	0.406792
itgax	0.0532355	0.0702753	0.448937	884	-0.00575124	0.0110253	0.601926	38105	0.829224	0.406978
gpihbp1	-0.0882988	0.096233	0.359102	893	-0.00760979	0.0146663	0.60386	38629	-0.828904	0.407159
gprc5c	0.0674796	0.0846111	0.425359	893	-0.00331858	0.011713	0.776929	38610	0.828844	0.407193
lcp1	0.0583958	0.0703199	0.406518	897	-0.000441564	0.00994668	0.964591	38800	0.828463	0.407408
cdh4	-0.0462426	0.0649097	0.476401	867	0.00803662	0.00992201	0.417957	37546	-0.826625	0.408449
cep20	0.0612028	0.104215	0.557149	1028	-0.025879	0.0156586	0.0983991	44017	0.826323	0.408621
stoml2	-0.122911	0.13696	0.369746	862	-0.00879975	0.0193955	0.650047	37377	-0.82494	0.409405
timm8a	0.105442	0.116601	0.366084	895	0.00814859	0.018042	0.651528	38704	0.824598	0.4096
enpp2	0.0284967	0.0411073	0.488319	1064	-0.00570646	0.00560773	0.308871	45660	0.82441	0.409707
slamf1	-0.0631645	0.0937343	0.500545	1042	0.0147265	0.0123577	0.233391	44249	-0.823848	0.410026
rnf149	-0.0381619	0.0543538	0.482803	880	0.00687474	0.00649675	0.28998	37767	-0.822726	0.410664
prcp	0.0296739	0.0441695	0.501847	1059	-0.00708315	0.00681765	0.298837	45373	0.822441	0.410826
agt	-0.0244208	0.0338412	0.470712	900	0.00366727	0.00463325	0.42865	38840	-0.822324	0.410892
lypd1	0.0596118	0.0855025	0.485841	1025	-0.0115389	0.0132712	0.384595	44031	0.822301	0.410905
elavl4	-0.107159	0.117413	0.361673	867	-0.00953413	0.0176212	0.58847	37546	-0.822256	0.410931
ang	-0.0281723	0.0471527	0.550324	1048	0.0109743	0.00713953	0.124271	44994	-0.820853	0.41173
tp53	-0.0546204	0.0611012	0.371568	1028	-0.00393915	0.00908473	0.66458	44017	-0.820445	0.411962
slc13a1	-0.0522584	0.0667875	0.434154	893	0.00349872	0.0125992	0.781248	38610	-0.820374	0.412003
hpcal1	0.0844711	0.10278	0.41134	1060	-0.00059337	0.015337	0.969139	45599	0.818574	0.413029
cradd	0.0780445	0.103116	0.449304	1038	-0.00733814	0.0157931	0.64219	44691	0.818484	0.413081
ogt	-0.0844957	0.0946354	0.372179	884	-0.00634217	0.0131566	0.629771	38105	-0.817972	0.413373
atf2	-0.0924089	0.0904503	0.307187	1025	-0.0175573	0.0144004	0.222767	44031	-0.817251	0.413785
myoc	0.0579497	0.0694034	0.403926	1047	0.000734066	0.00947405	0.938241	45114	0.816817	0.414033
bnip3l	0.0574639	0.063812	0.368098	859	0.00482043	0.00936985	0.606932	37668	0.816226	0.414371
adam15	0.034932	0.0451998	0.439798	1030	-0.00232515	0.00640017	0.716386	44275	0.816135	0.414423
slc28a1	-0.0696111	0.064774	0.282822	862	-0.0158848	0.0126564	0.209457	37377	-0.814047	0.415618
mad1l1	0.0359512	0.070963	0.612531	1036	-0.0224456	0.0106079	0.0343554	44618	0.813877	0.415716
shc1	0.135547	0.164935	0.411409	862	-9.46346e-05	0.0241412	0.996872	37377	0.813722	0.415804
gfral	-0.0684472	0.0961758	0.47685	867	0.0105227	0.0130834	0.421242	37542	-0.813606	0.41587
dars1	0.0759395	0.101156	0.452993	1038	-0.00728242	0.0152658	0.633334	44691	0.813498	0.415932
ensa	-0.0466935	0.0676983	0.490545	893	0.00907926	0.0108796	0.403994	38610	-0.813405	0.415986
itga5	0.0273135	0.0378105	0.470224	1047	-0.0037564	0.00546931	0.492204	45114	0.813262	0.416068
ankra2	0.0859776	0.0892294	0.33554	862	0.0128128	0.0116518	0.271497	37377	0.813059	0.416184
matn3	0.0345298	0.0513977	0.501851	1040	-0.00760276	0.00663077	0.251558	44682	0.812999	0.416219
faslg	-0.0345373	0.0547984	0.52866	1060	0.0104334	0.0077493	0.178189	45599	-0.812573	0.416463
ostn	0.0467204	0.0536566	0.384144	867	0.00257889	0.00860057	0.764292	37741	0.812298	0.41662
lgals9	0.0529176	0.0550049	0.336246	1051	0.00789061	0.00707998	0.265072	45089	0.811901	0.416848
arfip1	-0.0782821	0.0924997	0.397615	894	-0.00230514	0.0143694	0.872551	38726	-0.811641	0.416998
znrd2	0.0591561	0.097857	0.545656	893	-0.0211121	0.014532	0.146287	38629	0.811362	0.417158
adgrv1	0.0693908	0.0951691	0.466119	867	-0.00859927	0.0145446	0.554367	37546	0.810083	0.417892
notch2	-0.0203817	0.030112	0.498667	897	0.00423722	0.00420641	0.313785	38800	-0.809718	0.418102
cpe	0.0248395	0.0558337	0.656496	1053	-0.0208359	0.00808187	0.00993743	45116	0.809624	0.418156
arsa	0.0534595	0.0636469	0.401135	1047	0.00141254	0.0092527	0.878665	45114	0.80924	0.418377
lbp	-0.0818048	0.0852763	0.337633	1053	-0.0121157	0.0123131	0.325138	45299	-0.808828	0.418614
dennd2b	-0.0639141	0.0826187	0.439378	865	0.00340595	0.0103577	0.742284	37510	-0.8085	0.418803
gzma	0.0354431	0.0517825	0.493835	1060	-0.00682149	0.00728365	0.348996	45599	0.808237	0.418954
col6a3	0.0572458	0.0697874	0.412237	1064	0.000513861	0.00764069	0.94638	45660	0.808096	0.419036
jpt2	0.115983	0.121018	0.338127	893	0.0171597	0.0181859	0.345395	38629	0.807529	0.419361
gga1	0.0609361	0.0881684	0.489639	1025	-0.0111973	0.0144601	0.438722	44031	0.807347	0.419467
ncam2	0.0271756	0.0417936	0.515684	1047	-0.00688533	0.00578799	0.234214	45114	0.807276	0.419507
skiv2l	0.0584221	0.0645246	0.365494	865	0.00594251	0.0083317	0.475701	37510	0.80663	0.419879
hgs	0.0652871	0.105478	0.536077	1028	-0.0205724	0.0162684	0.206036	44017	0.804492	0.421113
phldb2	0.101116	0.129691	0.435798	862	-0.00434662	0.0193383	0.822162	37377	0.804297	0.421226
galnt2	0.0278577	0.0418557	0.505833	1060	-0.00606904	0.00535177	0.25679	45479	0.80402	0.421385
mrpl46	-0.0320914	0.0385574	0.405433	1025	-0.000753702	0.00575018	0.895717	44031	-0.803865	0.421475
mtss2	0.0974521	0.142186	0.493281	893	-0.0179973	0.0207264	0.385221	38610	0.803466	0.421705
espl1	0.0635	0.074999	0.397411	862	0.00251559	0.0117351	0.830264	37377	0.803361	0.421766
pnpt1	0.119327	0.152259	0.433389	1042	-0.00458257	0.0249531	0.854291	44249	0.803094	0.42192
ca2	0.0911386	0.103613	0.379277	1041	0.00708803	0.0147864	0.631683	44970	0.80306	0.42194
golga3	0.0910265	0.108432	0.401427	894	0.00300829	0.0163104	0.85367	38726	0.802703	0.422146
scrn1	0.0620598	0.0723807	0.391416	1050	0.00321032	0.0116896	0.783602	45034	0.802655	0.422174
cga	-0.0721749	0.101932	0.479063	1047	0.0106992	0.0165233	0.517296	45114	-0.802554	0.422233
nagk	0.0565196	0.0781098	0.46951	878	-0.00681707	0.012027	0.570843	37694	0.801423	0.422887
arhgef1	0.100834	0.125394	0.421533	895	-0.000746191	0.0188459	0.968417	38704	0.801091	0.423079
med18	0.0689293	0.106621	0.518107	1028	-0.0170385	0.0160188	0.287493	44017	0.797346	0.42525
tcn1	0.0385465	0.05033	0.443959	873	-0.00195432	0.00699356	0.779905	38064	0.797047	0.425424
ghr	-0.0262433	0.0432114	0.543794	880	0.0085739	0.0065205	0.188546	37950	-0.796721	0.425613
masp1	0.0316121	0.0345301	0.360146	1038	0.00386242	0.00491428	0.431895	44691	0.79562	0.426253
il3ra	0.0352769	0.0486246	0.468312	1042	-0.00373137	0.00657232	0.570214	44249	0.795004	0.426611
arg1	0.0472392	0.0761991	0.53543	1043	-0.0139691	0.0110686	0.206935	44829	0.794926	0.426657
gdf2	0.0353672	0.0541525	0.513833	1052	-0.00808221	0.00748739	0.280396	45128	0.794791	0.426735
tek	0.0192992	0.0323896	0.551406	1052	-0.00668446	0.00451786	0.138997	45247	0.794533	0.426885
csf2rb	-0.039884	0.063137	0.527749	859	0.0107601	0.00899121	0.231416	37668	-0.794118	0.427127
cadps	-0.0428702	0.0645666	0.506889	867	0.00888063	0.00894062	0.320575	37741	-0.793934	0.427234
ythdf3	0.101971	0.125968	0.418416	1042	0.000975549	0.0177294	0.956119	44249	0.793925	0.427239
pcsk7	-0.0531933	0.0616881	0.388759	893	-0.00384723	0.00937037	0.681387	38610	-0.790856	0.429028
col28a1	-0.0820223	0.106023	0.439363	867	0.00270918	0.0155829	0.861979	37741	-0.790687	0.429127
csrp3	0.112138	0.150396	0.456101	865	-0.00761579	0.02014	0.705326	37510	0.789213	0.429987
il7r	-0.0697164	0.0782547	0.373193	1047	-0.00732231	0.0112506	0.515156	45114	-0.789206	0.429991
ntrk3	0.0251118	0.0346354	0.468593	1060	-0.00246969	0.00474118	0.602438	45500	0.78898	0.430123
atf4	0.0353552	0.0455339	0.437692	862	-0.000998451	0.00705626	0.887477	37377	0.788969	0.43013
sirpb1	-0.0449521	0.0759587	0.554115	1050	0.0153902	0.00959821	0.108844	45017	-0.788142	0.430614
itgb5	0.0313202	0.053985	0.561929	1052	-0.0116609	0.00781881	0.135867	45247	0.787945	0.430729
cxadr	0.061404	0.0756959	0.41744	1050	0.00120963	0.0106315	0.909414	45034	0.787483	0.430999
raly	0.0370427	0.069649	0.594964	893	-0.0183364	0.0104002	0.077896	38610	0.786398	0.431634
lmod2	-0.0623866	0.0844744	0.460396	867	0.00476772	0.0130933	0.71576	37546	-0.785586	0.43211
msra	0.0657903	0.0999551	0.510555	1052	-0.0135811	0.0151747	0.370802	45247	0.785075	0.43241
psg1	-0.188375	0.184872	0.308465	1041	-0.0420918	0.0238551	0.077659	44759	-0.784763	0.432593
nefl	0.0603584	0.0753902	0.423542	1023	0.000850517	0.00918804	0.926247	43884	0.783534	0.433313
egfl7	-0.0495741	0.0587725	0.399151	1028	-0.0030975	0.00833836	0.710285	44017	-0.782948	0.433658
tnfsf14	0.0667883	0.0755233	0.376718	1041	0.00695841	0.0122261	0.56926	44759	0.782024	0.434201
fkbp1b	0.102352	0.150086	0.495419	1053	-0.016242	0.0233094	0.485931	45234	0.780811	0.434913
hmgcl	-0.041073	0.0703581	0.559525	880	0.0144543	0.0103604	0.162982	37767	-0.78079	0.434926
ephb4	-0.0326234	0.0446225	0.464881	1064	0.00244008	0.00508732	0.631486	45660	-0.780723	0.434966
stc2	0.0317632	0.0381797	0.405634	1042	0.00166162	0.00541781	0.759077	45052	0.780599	0.435038
got1	0.0230949	0.0590753	0.695934	897	-0.0234942	0.00869527	0.00689642	38800	0.780233	0.435254
ambn	0.0324029	0.0391551	0.408115	1042	0.00153228	0.00572309	0.788903	44249	0.780129	0.435315
mmp9	0.0966019	0.0892652	0.27942	1042	0.0264984	0.0129502	0.0407449	45044	0.777203	0.437039
pfkfb2	0.0667804	0.106753	0.53174	1041	-0.0171085	0.0161287	0.288809	44813	0.777008	0.437154
dll4	0.0703752	0.116774	0.54689	880	-0.0214159	0.0181428	0.237845	37767	0.776738	0.437313
arid4b	0.0481491	0.0638544	0.450997	1025	-0.00190728	0.00889934	0.830301	44031	0.776409	0.437507
rabepk	0.0480375	0.0771617	0.533715	1028	-0.0126118	0.0124069	0.30939	44017	0.776035	0.437729
casp3	0.0835575	0.121043	0.490149	1064	-0.0113384	0.0184003	0.537759	45660	0.775081	0.438292
cep85	0.0473459	0.087913	0.590312	1028	-0.0215382	0.0135912	0.113038	44017	0.774348	0.438725
ulbp2	-0.0492869	0.0652382	0.450126	1041	0.00156199	0.00771791	0.839616	44759	-0.774037	0.438909
ca3	-0.0593266	0.0897182	0.508593	1063	0.010806	0.0127265	0.395831	45587	-0.773951	0.43896
mtif3	-0.0890101	0.126502	0.481849	893	0.00989222	0.0181651	0.586051	38629	-0.773888	0.438997
plau	-0.0396437	0.0393369	0.313785	1047	-0.00888225	0.00603382	0.141007	45114	-0.772959	0.439547
tigit	-0.0459952	0.0495153	0.353191	884	-0.0072842	0.00753238	0.333525	38105	-0.772907	0.439577
rarres1	-0.0293152	0.0465031	0.528579	1028	0.00701064	0.00692841	0.311607	44017	-0.772621	0.439747
slamf8	-0.0569582	0.0823811	0.489472	1028	0.00727051	0.0112823	0.519308	44017	-0.772443	0.439852
serpine2	0.075888	0.0907859	0.403434	900	0.00513518	0.0134313	0.702219	38800	0.770946	0.440739
dhps	-0.0467511	0.0522355	0.371026	893	-0.00596323	0.00856872	0.486477	38610	-0.770547	0.440975
nfkb1	0.0686654	0.0986953	0.486785	865	-0.0082239	0.0156305	0.59879	37510	0.769468	0.441616
tjap1	0.0568357	0.112977	0.615018	1052	-0.0311133	0.0175818	0.0767954	45247	0.769212	0.441768
siglec10	-0.0437214	0.0547188	0.42446	1050	-0.00136442	0.0070886	0.847367	45034	-0.767671	0.442683
eif2s2	-0.031941	0.0579043	0.581351	880	0.0130239	0.00890359	0.143538	37767	-0.767519	0.442773
f13b	0.0275732	0.0390911	0.480773	890	-0.0026775	0.00532461	0.61507	38650	0.766772	0.443217
chit1	-0.229828	0.231583	0.321218	1060	-0.0508338	0.0311726	0.102956	45288	-0.76601	0.44367
leg1	0.0549082	0.105178	0.601772	856	-0.0263874	0.014263	0.0643124	36660	0.765921	0.443723
il13	0.0579622	0.068131	0.395106	1042	0.00525391	0.0102649	0.608769	44249	0.764998	0.444273
f11	0.0434116	0.0507405	0.392473	885	0.00430993	0.00634143	0.496733	38301	0.764672	0.444467
shmt1	0.0795889	0.114387	0.486719	1053	-0.00895698	0.0180685	0.620092	45235	0.764607	0.444505
tnfrsf13b	-0.0415204	0.0566012	0.463381	1052	0.00207588	0.00703655	0.767985	45160	-0.764352	0.444658
ap3b1	0.0783463	0.106587	0.462504	893	-0.00399768	0.0161274	0.804227	38629	0.76386	0.444951
defb116	-0.0853963	0.097926	0.383424	867	-0.00962923	0.0158473	0.543439	37546	-0.763782	0.444997
fam20a	0.0307981	0.0423797	0.467589	900	-0.00189172	0.00616765	0.759061	38800	0.763314	0.445276
atxn3	0.088882	0.0921055	0.334806	895	0.017892	0.0131953	0.175128	38704	0.762957	0.445489
cdkn2d	0.0993422	0.139052	0.475124	1043	-0.00777566	0.0195921	0.69146	44888	0.762812	0.445576
camlg	-0.0632905	0.0728825	0.385422	867	-0.00703462	0.0113231	0.534432	37741	-0.762721	0.44563
hmcn2	0.0575639	0.0902833	0.523906	876	-0.0118165	0.0118962	0.32057	37882	0.761889	0.446126
vsig2	0.081603	0.115582	0.480362	893	-0.0069437	0.0123075	0.572633	38610	0.761788	0.446187
pklr	0.0802033	0.0976563	0.411673	1052	0.00516234	0.0138926	0.710201	45167	0.760759	0.446801
stx16	0.0477528	0.0772383	0.536547	1028	-0.011687	0.0121476	0.336014	44017	0.760218	0.447124
rnaset2	-0.0362802	0.0431062	0.400177	1060	-0.00324376	0.00556383	0.559891	45442	-0.76009	0.447201
islr2	-0.0448821	0.0569739	0.43102	1007	-0.00121113	0.00790117	0.878175	43405	-0.759242	0.447708
usp47	-0.0900633	0.114152	0.430344	865	-0.00235524	0.0180995	0.896467	37510	-0.758863	0.447935
wdr46	0.0264223	0.047714	0.57988	893	-0.0102421	0.00773574	0.185513	38610	0.758514	0.448143
tank	0.0588321	0.0962258	0.541071	1042	-0.0149497	0.0147352	0.310324	44249	0.757922	0.448498
dusp3	0.0798145	0.116236	0.492454	1025	-0.00930567	0.0179642	0.604452	44031	0.757721	0.448618
smarca2	0.0595649	0.100705	0.554332	1025	-0.0174929	0.0150726	0.245821	44031	0.756751	0.449199
lrpap1	0.0480882	0.0772616	0.533809	1060	-0.0110287	0.0118143	0.350566	45500	0.75636	0.449433
larp1	0.0618639	0.0852145	0.468043	893	-0.00335028	0.013263	0.800576	38610	0.75619	0.449535
glo1	0.0648787	0.084189	0.441103	1030	0.00055501	0.0124021	0.964306	44275	0.755881	0.44972
lepr	0.0334745	0.0472094	0.478442	1052	-0.00254066	0.00667543	0.703503	45128	0.755368	0.450028
nrtn	0.0470084	0.0660482	0.476793	1042	-0.00348917	0.0104753	0.739071	44249	0.755118	0.450178
evi5	-0.10177	0.121863	0.403883	859	-0.00867204	0.0190248	0.648516	37668	-0.754816	0.45036
duox2	0.0964251	0.106952	0.367493	1030	0.0149212	0.0149527	0.318338	44275	0.754724	0.450415
mars1	0.088332	0.113623	0.437126	880	0.00153109	0.0180223	0.932297	37879	0.754504	0.450547
il1rl2	-0.0512826	0.0545392	0.347289	1042	-0.00971851	0.00817134	0.234312	44249	-0.753683	0.45104
amotl2	-0.058237	0.0660818	0.378403	887	-0.00788725	0.0102189	0.440221	38470	-0.75298	0.451462
cd302	-0.0377783	0.054994	0.492266	1043	0.00387676	0.00637824	0.543316	44888	-0.752403	0.451809
ednrb	-0.0385293	0.0619151	0.533916	859	0.00855424	0.00943282	0.364487	37668	-0.751778	0.452185
pmvk	0.1154	0.164507	0.483157	1022	-0.00910706	0.0227266	0.688626	43961	0.74973	0.453417
morn4	0.0751529	0.103515	0.468029	862	-0.00341446	0.0165298	0.836351	37377	0.749502	0.453555
klk8	-0.0421515	0.0557519	0.449793	1013	-4.41009e-05	0.00747973	0.995296	43609	-0.748558	0.454124
parp1	0.0600339	0.0790099	0.447529	1050	0.000194781	0.0121876	0.987249	45034	0.74851	0.454153
immt	0.0510959	0.0639645	0.42461	893	0.00273598	0.00939584	0.770907	38610	0.748016	0.454451
map4k5	0.108806	0.157192	0.488976	1038	-0.00990332	0.0233938	0.672056	44691	0.746961	0.455087
sdc1	-0.0473056	0.065107	0.467645	1052	0.001674	0.00815292	0.837319	45128	-0.746463	0.455388
ifnar1	-0.0310585	0.0373448	0.40582	893	-0.00293372	0.00529522	0.57956	38629	-0.745652	0.455877
fgf19	-0.0758373	0.11187	0.497982	1053	0.00842683	0.0162256	0.603517	45311	-0.745432	0.456011
cinp	-0.0371411	0.0586269	0.526561	884	0.00707693	0.00921144	0.442328	38105	-0.745087	0.456219
sowaha	-0.0434473	0.0678916	0.522374	867	0.00765345	0.0103104	0.457907	37741	-0.744149	0.456786
nrp2	0.0286671	0.0443877	0.518529	1047	-0.00464612	0.00594303	0.43435	45114	0.743868	0.456956
dpp7	0.0578151	0.08715	0.507224	1040	-0.0075563	0.0125422	0.546865	44766	0.742452	0.457813
igfbp4	-0.0498989	0.0890633	0.575423	1026	0.0165118	0.00917155	0.0718155	44565	-0.741735	0.458248
crkl	0.10467	0.150488	0.486874	1052	-0.00813194	0.0222759	0.715072	45167	0.741494	0.458394
clec4m	-0.0605911	0.0659525	0.358497	896	-0.0111269	0.010027	0.267139	38732	-0.741477	0.458404
ccl7	0.0817943	0.0901933	0.36468	1050	0.0142921	0.0124262	0.250088	45034	0.741414	0.458442
fgf20	-0.0513991	0.0595031	0.387938	859	-0.0067826	0.00917056	0.459544	37668	-0.741068	0.458652
camsap1	0.0989346	0.146152	0.498626	894	-0.0105754	0.0227293	0.641737	38726	0.74039	0.459063
creld2	-0.05448	0.0746724	0.465806	1053	0.00133423	0.0108823	0.902421	45235	-0.739642	0.459517
vmo1	-0.0546737	0.094274	0.562078	1043	0.0158285	0.0142092	0.265303	44888	-0.739491	0.459609
lair2	-0.0740461	0.144645	0.608817	1041	0.0340911	0.0218314	0.118397	44759	-0.739235	0.459765
entpd5	0.0201252	0.0306807	0.512001	1030	-0.0027632	0.0044034	0.530325	44275	0.73845	0.460241
serpinb5	-0.0462708	0.0716486	0.518552	1030	0.00712658	0.0101005	0.480461	44275	-0.73797	0.460532
vit	0.0461106	0.0595797	0.439175	900	0.00178507	0.00777453	0.8184	38800	0.737717	0.460687
rnf168	-0.0331953	0.0574561	0.563585	859	0.00966404	0.00862473	0.262506	37668	-0.737684	0.460706
nucb2	-0.0456766	0.0552507	0.408585	1057	-0.00451421	0.00785048	0.565279	45410	-0.737604	0.460755
mvk	0.0635022	0.114374	0.578866	1042	-0.0216305	0.0169265	0.201287	44249	0.736318	0.461537
dand5	-0.046808	0.0738426	0.526323	859	0.00810551	0.0116509	0.486621	37668	-0.734569	0.462602
glb1	0.0342205	0.0590113	0.56211	1041	-0.00953861	0.00875761	0.276081	44759	0.733504	0.463251
lefty2	-0.0645639	0.075347	0.391702	1057	-0.0087661	0.0107853	0.416346	45412	-0.733073	0.463514
kir3dl1	0.103062	0.176732	0.559917	1028	-0.0278218	0.0256985	0.278981	44017	0.732872	0.463636
gfra2	0.0222987	0.0295032	0.449937	1043	0.000466563	0.00435249	0.914635	44888	0.732069	0.464126
serpini2	0.0577297	0.0799067	0.4702	893	-0.00136589	0.0114907	0.90538	38629	0.732027	0.464152
sfrp4	0.0462946	0.0666194	0.487295	880	-0.00287768	0.00886297	0.745421	37950	0.731662	0.464375
tst	-0.0795884	0.104455	0.446272	1025	-0.00238566	0.0156803	0.879074	43956	-0.730912	0.464833
cd38	-0.0340841	0.0548428	0.534415	1043	0.00626684	0.00659689	0.342133	44888	-0.730491	0.46509
plin1	-0.0387061	0.0604091	0.521841	1025	0.00575306	0.0077126	0.455713	44031	-0.730041	0.465365
rarres2	-0.0454263	0.0770506	0.555609	1055	0.0113564	0.0106792	0.287598	45372	-0.729976	0.465405
s100g	0.0524995	0.0752191	0.485388	894	-0.0028473	0.00961089	0.767035	38726	0.729874	0.465467
pdzd2	0.0580968	0.0757701	0.44344	865	0.00214216	0.0125169	0.864114	37510	0.728604	0.466244
arhgap45	0.0735343	0.112044	0.511805	880	-0.00898498	0.017344	0.60443	37950	0.727821	0.466723
gmpr	0.0622804	0.0756254	0.410389	1060	0.00673038	0.0104137	0.518089	45599	0.727674	0.466813
fstl3	-0.0488987	0.0630664	0.438307	1049	-0.00272743	0.00699887	0.696763	45013	-0.727639	0.466834
pdgfra	0.0345537	0.0456878	0.449639	1052	0.00104223	0.00582804	0.858072	45128	0.727593	0.466863
kir2dl3	-0.0945374	0.114952	0.411036	1028	-0.0101109	0.0160457	0.52861	44017	-0.727399	0.466982
chgb	-0.0530505	0.0684825	0.438716	1056	-0.00288094	0.0085611	0.736484	45355	-0.726931	0.467268
ntprobnp	0.121324	0.213662	0.570269	1052	-0.034491	0.0204612	0.091865	45128	0.725941	0.467875
mif	0.0702775	0.0957875	0.463309	1044	3.37034e-05	0.0142784	0.998117	45040	0.725315	0.468259
folr1	-0.0397898	0.050688	0.432635	1048	-0.00288235	0.00596354	0.628864	45031	-0.723143	0.469592
cd177	0.0860791	0.178679	0.630084	1044	-0.0445252	0.0267856	0.0964632	45050	0.722865	0.469763
prdx6	-0.0799696	0.08926	0.370501	1060	-0.014799	0.012749	0.245732	45479	-0.722786	0.469811
areg	0.0402587	0.0751677	0.59236	1043	-0.0144909	0.00947369	0.126125	44888	0.722649	0.469896
htr1a	0.0839949	0.105445	0.425916	867	0.00698596	0.0158741	0.659878	37546	0.722186	0.47018
tpk1	0.0286304	0.0415769	0.491246	900	-0.00168148	0.00575339	0.77009	38800	0.722173	0.470188
lxn	-0.0532196	0.10115	0.598899	1037	0.0204091	0.0141195	0.148337	44552	-0.72093	0.470953
cebpa	-0.0283255	0.0473075	0.549497	859	0.00623361	0.00797205	0.434259	37668	-0.720363	0.471301
arhgap1	0.0500019	0.0680812	0.462846	1028	0.000469517	0.00964847	0.961189	44017	0.720351	0.471309
eif5	-0.0278784	0.0602853	0.643882	865	0.0160423	0.00912858	0.0788635	37510	-0.720335	0.471319
sparc	0.0614782	0.101972	0.546709	1052	-0.0126509	0.0147307	0.390447	45247	0.719489	0.47184
akr1b10	0.0471721	0.0833769	0.571697	867	-0.0135213	0.0128565	0.29294	37741	0.719438	0.471871
myom3	0.0748363	0.144353	0.604291	880	-0.0299077	0.0192722	0.120704	37950	0.719231	0.471999
pde4d	0.0585632	0.0824218	0.477568	865	-0.00143526	0.0128856	0.911312	37510	0.719208	0.472013
cdh15	-0.0876027	0.0990501	0.376667	1057	-0.0159699	0.0120504	0.185093	45432	-0.717904	0.472817
susd1	-0.0444833	0.0720102	0.536887	1030	0.00771064	0.0100731	0.443995	44275	-0.717823	0.472866
ido1	0.0685201	0.103071	0.506361	880	-0.00605984	0.0133	0.648661	37767	0.717631	0.472985
myh9	0.0925813	0.162919	0.569997	897	-0.0254751	0.0236785	0.28199	38800	0.7171	0.473312
tdrkh	0.0638477	0.117248	0.586179	1025	-0.0211854	0.017821	0.234528	44031	0.717008	0.473369
ncan	-0.0539228	0.0602841	0.37127	1060	-0.0103018	0.00821251	0.209701	45500	-0.716968	0.473394
cd69	0.0920093	0.125325	0.463013	1048	0.0012211	0.0182622	0.946689	44916	0.716851	0.473466
npdc1	-0.0436335	0.0625995	0.485941	1052	0.00146851	0.0065217	0.821845	45128	-0.716606	0.473617
acp6	-0.0651635	0.104466	0.532909	1057	0.0103572	0.0140014	0.459469	45412	-0.716515	0.473673
sel1l	0.0392588	0.0489252	0.422525	880	0.00393871	0.0066812	0.555515	37767	0.715282	0.474435
dtx2	-0.055133	0.0883254	0.532659	867	0.0087527	0.0133049	0.510634	37741	-0.71523	0.474467
mcfd2	-0.0432731	0.061264	0.480135	1047	0.000930972	0.0091903	0.919313	44912	-0.713551	0.475505
grik2	-0.0401392	0.0600162	0.503793	894	0.00306527	0.00871957	0.725186	38726	-0.712401	0.476217
ceacam20	0.0469394	0.0679609	0.489948	884	-0.00190394	0.00920786	0.836188	38105	0.71219	0.476347
mamdc4	0.0533324	0.081043	0.51066	893	-0.00486161	0.0116567	0.676632	38610	0.710749	0.47724
ccl18	-0.0640994	0.101545	0.528023	1031	0.00879275	0.0150289	0.558513	44498	-0.710097	0.477644
sned1	0.0313541	0.0454946	0.490891	880	-0.00128868	0.0068065	0.849834	37767	0.709611	0.477946
sema7a	0.0249431	0.0454197	0.583006	1062	-0.00753226	0.00569666	0.1861	45513	0.709447	0.478047
cspg5	-0.0480432	0.0724434	0.507391	867	0.00383021	0.0103031	0.710078	37546	-0.70892	0.478374
csnk1d	0.0679337	0.0877668	0.43913	859	0.00501952	0.013431	0.70861	37668	0.708585	0.478582
epha2	-0.041648	0.0601749	0.489024	1013	0.00120702	0.00643486	0.85121	43446	-0.708137	0.47886
sh2b3	0.0840046	0.140657	0.550486	1028	-0.0165857	0.0205837	0.420381	44017	0.70761	0.479188
cdc27	0.0446903	0.0822219	0.586881	1028	-0.0141853	0.0128446	0.269435	44017	0.707477	0.47927
dapk2	-0.0494634	0.0740641	0.504413	859	0.00350584	0.0117966	0.766322	37668	-0.706278	0.480015
prl	0.0836398	0.11033	0.448569	1060	0.00496468	0.015522	0.749086	45500	0.706133	0.480106
bpifa2	-0.0997622	0.160466	0.534301	866	0.0143132	0.0229817	0.533415	36391	-0.703721	0.481607
plxdc1	-0.0297102	0.053295	0.57733	1028	0.00809604	0.00710998	0.25484	44017	-0.703148	0.481964
cd200r1	-0.038551	0.0493492	0.43487	1047	-0.00357465	0.00722336	0.620692	44884	-0.701279	0.483129
klk6	-0.0391458	0.0487087	0.421769	1051	-0.00470226	0.00635336	0.45923	45167	-0.701194	0.483182
inppl1	0.0680924	0.135224	0.614683	1043	-0.0276109	0.0206651	0.181519	44888	0.699616	0.484167
wwp2	0.0278455	0.0729628	0.702807	1041	-0.023675	0.0113992	0.0378169	44759	0.697656	0.485392
lmod1	-0.0382593	0.0602337	0.525474	894	0.00402705	0.00718179	0.574985	38726	-0.697099	0.485741
tgm2	0.101905	0.10869	0.348682	1050	0.0253377	0.0158613	0.110173	45061	0.69707	0.485759
nagpa	0.0186334	0.0321788	0.562698	880	-0.00400813	0.00452635	0.375888	37950	0.696758	0.485954
fap	0.0181374	0.0427561	0.671502	1064	-0.011888	0.00565974	0.0356944	45660	0.696176	0.486319
ssc4d	-0.0923675	0.18158	0.611078	1049	0.0352308	0.0259224	0.174126	45058	-0.695659	0.486643
ccs	0.0494557	0.0662004	0.455197	1041	0.00290122	0.0100071	0.771883	44759	0.695336	0.486845
endou	0.0632386	0.0835571	0.449369	824	0.00480629	0.0110777	0.664386	35809	0.693244	0.488156
il22	0.0847405	0.107823	0.432125	893	0.00935078	0.0141814	0.509662	38610	0.693226	0.488168
il36g	0.100521	0.101628	0.322892	851	0.0294182	0.0140198	0.0358833	37518	0.693077	0.488261
clec14a	-0.035392	0.0540356	0.512628	1047	0.0023286	0.00652789	0.721306	45114	-0.693031	0.48829
mrpl58	-0.0743951	0.105037	0.478961	894	-0.000960332	0.0149725	0.948859	38726	-0.692134	0.488853
treml1	-0.0476878	0.074449	0.521983	900	0.00438201	0.0109469	0.688941	38840	-0.691963	0.488961
spink5	-0.0288083	0.0524775	0.583147	1047	0.00780829	0.00694509	0.260896	45114	-0.691727	0.489109
sdhb	0.0470546	0.0844577	0.577574	893	-0.0121576	0.0140498	0.386868	38629	0.691582	0.4892
pdzk1	0.0440086	0.0716991	0.539514	859	-0.00598355	0.00956249	0.531495	37668	0.69113	0.489484
ftcd	0.0503015	0.130453	0.699892	891	-0.0407077	0.0187115	0.0295957	38629	0.690572	0.489834
usp28	0.0432424	0.0552556	0.434077	895	0.00473628	0.0077245	0.53978	38704	0.690162	0.490092
pamr1	-0.0144069	0.0411425	0.726281	1047	0.0142954	0.00609433	0.018996	45114	-0.690103	0.490129
fga	0.0319865	0.0484721	0.509496	881	-0.00175771	0.00658625	0.789566	37953	0.689817	0.490309
klb	-0.0885288	0.106032	0.403957	1025	-0.0146141	0.0155238	0.346507	44031	-0.689742	0.490356
lamp2	0.0215577	0.0292696	0.461583	1022	0.00122561	0.00417075	0.768867	43710	0.687703	0.49164
lysmd3	-0.0964417	0.146125	0.509433	867	0.00508255	0.0214006	0.812274	37741	-0.687444	0.491803
znf174	0.0318829	0.0537759	0.553415	859	-0.00546503	0.0078024	0.483664	37668	0.687314	0.491885
nfkbie	0.0377142	0.0674681	0.576288	1028	-0.00920109	0.010436	0.377959	44017	0.687198	0.491958
mavs	0.0580881	0.125549	0.643696	1028	-0.0291783	0.0195403	0.135381	44017	0.686813	0.492201
galnt5	0.0227136	0.0408012	0.577879	900	-0.00557563	0.00565487	0.324145	38800	0.686777	0.492223
slc9a3r1	0.0923549	0.118296	0.435183	880	0.0102197	0.0178069	0.566027	37950	0.686586	0.492343
bst1	0.0476031	0.066117	0.471695	1060	0.00175687	0.00988782	0.858975	45500	0.685784	0.492849
igf1r	0.018552	0.032493	0.568154	1043	-0.00392735	0.00446882	0.379495	44888	0.68537	0.49311
fam3c	-0.0307782	0.0505122	0.542444	1049	0.00405365	0.00616923	0.511136	45058	-0.684486	0.493668
bcam	0.0214506	0.0391027	0.583418	1047	-0.00549906	0.00494262	0.265895	45114	0.683761	0.494126
dynlt1	0.0594976	0.108405	0.583255	867	-0.0154605	0.0170215	0.363732	37741	0.683092	0.494549
atp1b3	-0.0322143	0.0507153	0.525468	865	0.00287355	0.00823775	0.727221	37510	-0.682909	0.494664
gli2	-0.0268954	0.0508171	0.596764	859	0.00811538	0.00703472	0.248664	37668	-0.682448	0.494956
cd93	-0.0350917	0.0523066	0.502449	1008	0.000868167	0.0064396	0.892757	43408	-0.682331	0.49503
eda2r	-0.051892	0.0738459	0.482394	1060	-0.00127492	0.00776541	0.86959	45479	-0.681683	0.49544
gpd1	-0.0597904	0.0807002	0.458953	893	-0.00429725	0.0118925	0.717847	38610	-0.680299	0.496315
smad2	-0.0556972	0.0938156	0.552872	893	0.00888532	0.0145261	0.540752	38610	-0.680292	0.49632
vash1	0.0823294	0.112787	0.46558	1050	0.00477027	0.0170152	0.779207	45034	0.679968	0.496525
insl3	0.0665282	0.11291	0.555868	895	-0.0109753	0.0156226	0.482356	38704	0.679938	0.496544
lrig1	0.037381	0.0535912	0.485631	1055	0.000745956	0.00720218	0.917508	45346	0.677511	0.498082
ment	-0.0196702	0.0355193	0.579865	880	0.00458868	0.00474603	0.333627	37950	-0.676961	0.498431
snap29	0.0723256	0.131483	0.582386	1052	-0.017586	0.0189956	0.35456	45247	0.676799	0.498534
pam	0.0277963	0.0434806	0.52278	1059	-0.00189542	0.00589484	0.747803	45446	0.676682	0.498608
tbc1d23	0.0575825	0.12667	0.649501	1043	-0.029019	0.0189813	0.126315	44888	0.67613	0.498958
tmem132a	0.0650706	0.0885498	0.462629	880	0.004637	0.0130586	0.722522	37767	0.675179	0.499562
fadd	0.066504	0.103211	0.519491	1052	-0.00396069	0.0159682	0.804107	45128	0.674695	0.499869
rexo2	0.040804	0.068858	0.553617	865	-0.00614556	0.0102436	0.548549	37510	0.674409	0.500051
ccn5	0.0577705	0.0616561	0.348986	1047	0.0158497	0.00837895	0.0585501	45114	0.673722	0.500488
fcrl2	-0.0582078	0.0750308	0.43805	1058	-0.00730485	0.0101714	0.472651	45384	-0.672278	0.501406
gabra4	-0.0412935	0.0780672	0.596978	867	0.0119535	0.0134313	0.373485	37546	-0.67219	0.501463
slitrk6	-0.0274937	0.0583911	0.637845	1030	0.0120361	0.00711238	0.0905995	44275	-0.672018	0.501572
dnajb14	0.0599034	0.0858161	0.485333	893	0.00156662	0.0135666	0.908069	38629	0.671449	0.501934
oga	0.0580469	0.0964327	0.547366	893	-0.00741992	0.0148719	0.617838	38629	0.670954	0.50225
itgal	-0.0416727	0.0620953	0.502333	859	0.000340338	0.0091666	0.970383	37668	-0.669336	0.503281
ccl26	0.0716125	0.128802	0.578336	1050	-0.0154472	0.0188022	0.411331	45034	0.668832	0.503603
rhoc	0.0956542	0.167331	0.567686	1031	-0.0173105	0.0244382	0.47874	44503	0.668011	0.504126
hyal1	0.0184572	0.0331778	0.578119	1039	-0.00392742	0.00477136	0.410442	44880	0.667815	0.504251
zbtb17	0.0369197	0.0607399	0.543433	1030	-0.00406897	0.00888606	0.647024	44275	0.667715	0.504316
adgre5	0.0187	0.0475358	0.694113	1062	-0.0133184	0.00636012	0.0362608	45443	0.667614	0.50438
anxa5	0.0280211	0.0429417	0.514201	1023	-0.000940294	0.00629699	0.881298	43883	0.667299	0.504581
serpina5	0.0442536	0.0464781	0.341289	884	0.01293	0.00676152	0.0558464	38301	0.666922	0.504822
nfasc	0.0249856	0.0487806	0.608616	1060	-0.00777727	0.00584709	0.183488	45599	0.666863	0.504859
nos1	0.0616105	0.087451	0.481273	1025	0.00284031	0.0111565	0.799043	44031	0.666633	0.505007
fabp4	-0.065522	0.106732	0.539418	1064	0.00604726	0.0129008	0.63925	45660	-0.665706	0.505599
doc2b	-0.0181446	0.0519269	0.726854	867	0.0167447	0.00743728	0.0243621	37741	-0.665107	0.505982
col2a1	0.0958891	0.111019	0.387979	880	0.0212676	0.0167345	0.203778	37767	0.664643	0.506279
atp6v1d	-0.0267826	0.0346874	0.440223	1043	-0.00345212	0.00548665	0.529231	44888	-0.664334	0.506477
pdlim7	0.0888691	0.174989	0.611661	1053	-0.0286855	0.0266379	0.281545	45311	0.664133	0.506605
stx4	0.0337459	0.0780197	0.665446	1043	-0.0186631	0.0127642	0.14371	44888	0.662927	0.507377
cilp	0.0531326	0.0874716	0.543722	897	-0.0053152	0.0114359	0.64209	38800	0.662554	0.507616
psme1	0.0336853	0.0536797	0.530454	1039	-0.00216283	0.00791167	0.784568	44684	0.660678	0.508819
ptprb	0.0346061	0.0415477	0.40511	900	0.00686379	0.00620049	0.268311	38800	0.660407	0.508993
mamdc2	0.0439903	0.0685738	0.52136	900	-0.00151651	0.00708849	0.830595	38800	0.6601	0.509189
mpig6b	0.0667389	0.112887	0.554515	1053	-0.0083888	0.0158308	0.596182	45235	0.659061	0.509857
lsm8	-0.0543155	0.115838	0.639262	884	0.0228707	0.0180904	0.206149	38105	-0.658351	0.510312
trim21	0.0638441	0.104424	0.541072	1050	-0.00571133	0.0161267	0.723226	45034	0.658283	0.510356
vegfc	0.0519879	0.0793045	0.512259	1052	-0.000755651	0.011606	0.948088	45247	0.658066	0.510495
ca6	0.0592305	0.0918711	0.519255	1044	-0.00180851	0.0133337	0.892111	44971	0.65751	0.510853
myl3	0.0656183	0.110105	0.551353	880	-0.00738638	0.0151168	0.625113	37767	0.656887	0.511254
lilrb5	0.0390525	0.103122	0.704985	1064	-0.0293291	0.0146262	0.0449433	45660	0.656543	0.511475
matn2	0.0354418	0.0489017	0.468764	1052	0.00311606	0.0061337	0.611439	45160	0.655895	0.511892
scara5	0.0315409	0.0492078	0.521679	1060	-0.000984308	0.00627979	0.875449	45500	0.655659	0.512044
mthfd2	-0.015192	0.0356453	0.670066	895	0.00844232	0.0054685	0.122643	38704	-0.655373	0.512227
omg	0.0356963	0.102098	0.726689	1043	-0.0318233	0.0141401	0.024418	44888	0.655067	0.512424
galnt10	0.0168443	0.0418005	0.687054	1043	-0.0107634	0.00581897	0.0643609	44888	0.654157	0.51301
dtx3	0.0228723	0.0414673	0.58136	1043	-0.00443291	0.00500668	0.375946	44888	0.653727	0.513288
ppp1r12a	0.0773298	0.134345	0.565004	1052	-0.0114602	0.0200705	0.568002	45247	0.653659	0.513332
hspb6	0.0485554	0.0660803	0.462628	1060	0.00506	0.00814626	0.534508	45479	0.653276	0.513578
bambi	-0.032011	0.0478678	0.503813	1028	-0.000565828	0.00613657	0.926535	44017	-0.651585	0.514669
cd36	-0.0330665	0.060002	0.581716	859	0.00646778	0.00933417	0.488367	37668	-0.651052	0.515013
lrrc25	-0.046297	0.0616753	0.45303	1043	-0.00579144	0.00822574	0.481397	44888	-0.65099	0.515053
stx5	0.0506663	0.0547316	0.354852	859	0.0146606	0.00849666	0.084453	37668	0.65007	0.515647
dcbld2	0.0204727	0.0523363	0.695747	1052	-0.0138195	0.00724021	0.0563055	45247	0.649046	0.516309
chrm1	-0.0245131	0.0446485	0.58313	867	0.00487475	0.00773296	0.528446	37741	-0.64855	0.516629
anxa4	0.061391	0.0953315	0.519734	1049	-0.00113072	0.0150682	0.940183	44915	0.647793	0.517119
triap1	-0.053311	0.0855456	0.533296	1060	0.00275102	0.0131627	0.834448	45479	-0.647724	0.517164
ccl16	0.0605269	0.0756307	0.42372	1064	0.0111726	0.0107461	0.298491	45660	0.64608	0.518228
mcts1	-0.028732	0.0404082	0.477244	893	-0.00249265	0.00542865	0.646117	38629	-0.643574	0.519852
c3	-0.043722	0.0700661	0.532788	853	0.00180892	0.00989964	0.855014	36849	-0.643438	0.51994
cdkl5	0.0446019	0.0793235	0.574072	867	-0.00686108	0.0110415	0.534346	37546	0.642579	0.520498
ada	0.0375454	0.0522559	0.472614	1060	0.0036379	0.00738111	0.622109	45599	0.642496	0.520551
cd300lg	-0.0332593	0.0604696	0.582426	1047	0.00582758	0.00772518	0.450636	45114	-0.641177	0.521407
spink8	-0.0321209	0.0457707	0.483007	865	-0.0023744	0.00770374	0.757922	37510	-0.640889	0.521595
csde1	-0.122315	0.167755	0.46612	865	-0.0135922	0.0253259	0.591485	37510	-0.640846	0.521623
guk1	-0.0337602	0.0564525	0.549979	865	0.00274612	0.00843204	0.744671	37510	-0.639577	0.522447
il18rap	0.159919	0.236675	0.49939	1036	0.00688117	0.0356808	0.847074	44472	0.63939	0.522569
cbln1	-0.112041	0.13798	0.417012	867	-0.022895	0.0200102	0.25256	37546	-0.639388	0.522571
tlr2	-0.0202364	0.0321193	0.528833	884	0.000518135	0.00482673	0.914514	38105	-0.638996	0.522826
cdhr1	0.0282127	0.0547344	0.606352	1025	-0.00721458	0.00898615	0.422063	44031	0.638707	0.523013
esr1	0.0693352	0.083512	0.406634	859	0.0154612	0.0122436	0.206671	37668	0.638281	0.52329
sox2	-0.0296913	0.0338367	0.380459	890	-0.00789543	0.00488424	0.105991	38652	-0.637542	0.523772
suox	-0.0825802	0.0910909	0.36488	894	-0.023953	0.0132783	0.0712503	38726	-0.636881	0.524202
tnfrsf8	-0.0422973	0.0677731	0.532696	1060	0.00126823	0.00934454	0.892044	45500	-0.63679	0.524262
il2rb	0.0368473	0.0519053	0.477929	1042	0.00342783	0.00787122	0.663209	44249	0.636576	0.524401
lilrb2	0.0205922	0.0488489	0.67344	1062	-0.0108388	0.00722231	0.13343	45443	0.636514	0.524442
klk11	-0.0273384	0.050773	0.590387	1042	0.00522208	0.00631672	0.408407	44825	-0.636388	0.524524
il31	-0.0257123	0.0746037	0.730441	859	0.0223352	0.0118183	0.0587805	37668	-0.636105	0.524708
denr	-0.0563584	0.0811351	0.48748	859	-0.00436633	0.0119622	0.715105	37668	-0.633956	0.52611
brme1	-0.030994	0.0612119	0.612747	867	0.00815406	0.00869956	0.348612	37546	-0.633188	0.526611
ikbkg	0.0470214	0.124578	0.70592	1050	-0.0328121	0.0194213	0.0911324	45034	0.633181	0.526615
fshb	-0.0414909	0.0751068	0.580798	880	0.00676637	0.0134624	0.61524	37767	-0.632436	0.527102
cntn3	0.0347623	0.0441197	0.430929	1047	0.00658836	0.00691258	0.340546	45114	0.630884	0.528117
il17rb	-0.0617997	0.0767304	0.420767	1034	-0.0128703	0.0113236	0.255715	44466	-0.630847	0.528141
cpa4	0.0325559	0.0684997	0.634716	859	-0.0110228	0.00902564	0.221989	37208	0.630736	0.528213
ltbr	-0.0304782	0.0537272	0.570649	1048	0.00360446	0.00585111	0.537877	44871	-0.630636	0.528279
terf1	-0.0284675	0.0454913	0.531626	859	0.00045508	0.00616732	0.941179	37668	-0.630021	0.528681
tmed4	-0.0422335	0.0805253	0.600084	865	0.00897498	0.0117223	0.443899	37510	-0.629297	0.529155
top1mt	-0.0369291	0.0679623	0.587012	862	0.00630873	0.0101862	0.535697	37377	-0.629175	0.529234
ccl24	-0.0867089	0.121359	0.475088	1053	-0.00959448	0.0173765	0.580847	45235	-0.629008	0.529344
hcls1	0.0482805	0.075302	0.521559	1060	0.000385298	0.0116832	0.973692	45599	0.628522	0.529662
chek2	0.0336581	0.0441137	0.445648	1030	0.00559119	0.0069792	0.423065	44275	0.628423	0.529727
dpep2	0.026071	0.0422103	0.536945	1043	-0.000712766	0.00598077	0.905136	44888	0.628256	0.529836
dnaja4	0.0757456	0.107589	0.481599	895	0.00752312	0.0150783	0.617826	38704	0.627967	0.530026
txndc15	0.0354981	0.0427159	0.406146	1052	0.00852872	0.0056537	0.131428	45247	0.62591	0.531374
ca5a	-0.125127	0.143897	0.384744	1030	-0.0343134	0.0195159	0.0787157	44275	-0.625377	0.531724
pdia3	-0.0190432	0.0348334	0.584729	880	0.00297469	0.00521855	0.568666	37950	-0.625114	0.531896
fcn2	0.0375566	0.058333	0.519828	1041	0.000738689	0.00859884	0.931542	44925	0.62442	0.532352
wfdc12	-0.0622025	0.102094	0.542478	1058	0.00203564	0.0133895	0.879161	45403	-0.623864	0.532717
tnfrsf14	-0.0343937	0.0531469	0.51768	1052	-0.00100319	0.00636014	0.87467	45160	-0.623818	0.532747
psmg4	0.0639401	0.0904047	0.479595	859	0.00709219	0.0121356	0.558947	37668	0.623225	0.533136
lag3	-0.051859	0.0620852	0.403748	1043	-0.0128451	0.00845915	0.128899	44888	-0.622639	0.533521
pibf1	0.0601009	0.108694	0.580445	894	-0.0082673	0.0162717	0.611401	38726	0.622067	0.533898
arhgef12	0.0630184	0.145723	0.665501	1050	-0.0285903	0.0219213	0.192164	45034	0.621654	0.534169
f2	-0.0138271	0.0230528	0.548791	898	0.000592534	0.00308643	0.847759	38862	-0.619973	0.535276
pde5a	0.0936875	0.146425	0.522448	880	0.00192329	0.0218638	0.929904	37950	0.619827	0.535372
inpp5d	0.0455347	0.082092	0.579256	880	-0.00591617	0.0123022	0.630587	37767	0.619825	0.535373
adh4	0.0429694	0.123417	0.727788	1030	-0.0343637	0.018632	0.06514	44275	0.61958	0.535534
ppif	0.067208	0.0902208	0.456511	897	0.0107688	0.0130272	0.408448	38800	0.619147	0.53582
reg1b	-0.0479042	0.0889995	0.590516	1064	0.00762965	0.0117104	0.514709	45660	-0.618647	0.536149
klk7	0.0301217	0.0574947	0.600482	853	-0.00579117	0.00806629	0.472794	36985	0.618572	0.536198
pglyrp2	-0.02601	0.0440434	0.554972	886	0.0014806	0.00631877	0.814739	38365	-0.617844	0.536678
sox9	-0.0265355	0.0421586	0.529241	867	-0.000264424	0.00560111	0.962347	37741	-0.61772	0.53676
gcc1	0.0953096	0.154484	0.537421	895	-0.000978596	0.0226328	0.965512	38704	0.616707	0.537428
nck2	0.0957986	0.150589	0.524812	1053	0.00202888	0.0220968	0.926843	45311	0.616088	0.537836
cox5b	0.0581459	0.0971336	0.549558	1043	-0.00230127	0.0144909	0.873821	44888	0.615498	0.538226
cwc15	-0.068296	0.0838816	0.415752	891	-0.0160823	0.0131632	0.221804	38404	-0.614943	0.538593
zbtb16	-0.0722099	0.100596	0.47303	1028	-0.00973655	0.0152003	0.521818	44017	-0.614064	0.539173
nfatc1	0.0452049	0.133154	0.734306	1050	-0.0374896	0.0206209	0.0690654	45034	0.61373	0.539394
lpo	0.0533761	0.088927	0.548492	1014	-0.00168786	0.0123598	0.891379	43604	0.613309	0.539672
cntn1	0.0172339	0.0421244	0.682535	1064	-0.00883198	0.00568246	0.120131	45660	0.613229	0.539725
tie1	0.0113384	0.0577415	0.844362	1064	-0.0244546	0.00859594	0.00444445	45660	0.613127	0.539792
slc51b	0.0737664	0.104734	0.481425	865	0.00887873	0.0157713	0.573461	37510	0.612638	0.540116
ereg	0.0641613	0.109084	0.55654	1038	-0.00343494	0.0166695	0.836744	44691	0.612559	0.540168
itgam	-0.034548	0.0433983	0.426174	1047	-0.00768721	0.00658993	0.243415	45114	-0.611921	0.54059
efnb2	-0.0636259	0.099385	0.522215	867	-0.00249763	0.0121773	0.837491	37741	-0.6105	0.541531
proc	-0.0242674	0.0416198	0.55997	1050	0.00133169	0.00530844	0.801921	45223	-0.610127	0.541778
cpm	0.0335254	0.0523096	0.521725	1056	0.0012684	0.00776163	0.870189	45270	0.609977	0.541877
gkn1	0.0241823	0.0433654	0.577216	999	-0.00249264	0.00578063	0.666321	43189	0.609727	0.542043
rnaseh2a	-0.0521807	0.0655615	0.4263	894	-0.0117888	0.0104474	0.259161	38726	-0.608415	0.542912
vnn1	0.0642419	0.104821	0.540115	900	-0.00022484	0.015558	0.98847	38840	0.608355	0.542952
dipk2b	-0.0291205	0.041193	0.4798	880	-0.00382142	0.00579223	0.509419	37950	-0.608175	0.543071
dtnb	0.0337158	0.0679006	0.619632	889	-0.00793342	0.00918091	0.387526	38535	0.607854	0.543284
bmp4	0.0263786	0.072592	0.716394	1040	-0.0180215	0.00947925	0.057288	44682	0.60649	0.544189
dnajb6	0.0777668	0.114255	0.496282	869	0.00764054	0.0177522	0.666907	37600	0.60649	0.544189
lect2	-0.03506	0.103189	0.734112	900	0.0280308	0.0137756	0.0418768	38800	-0.606036	0.544491
scn3a	-0.0302258	0.0566778	0.593969	867	0.00441243	0.00766473	0.564835	37741	-0.605631	0.54476
metap2	0.0409527	0.0803702	0.610473	1057	-0.00825065	0.0120613	0.49394	45412	0.60543	0.544893
hspb1	0.061395	0.100847	0.542796	1038	-0.000258245	0.0143928	0.985685	44417	0.60522	0.545033
septin3	-0.0480319	0.102876	0.640691	894	0.0148775	0.0156459	0.341667	38726	-0.604558	0.545473
rab39b	-0.0517549	0.130976	0.692831	865	0.0281256	0.0187868	0.134378	37510	-0.603708	0.546038
sema6c	-0.0140193	0.0422602	0.740169	859	0.0116401	0.00554232	0.0357163	37668	-0.602021	0.54716
selplg	0.0258816	0.0378454	0.494204	1050	0.00289383	0.00542257	0.593577	45034	0.601273	0.547658
pmm2	-0.0387452	0.0847636	0.647717	865	0.0126281	0.0125973	0.316135	37510	-0.599492	0.548845
c1galt1c1	-0.0175061	0.0425125	0.680598	865	0.00821977	0.00670451	0.220204	37510	-0.597749	0.550007
ccn1	0.0665521	0.110533	0.547236	1041	-0.000151564	0.015861	0.992376	44813	0.597357	0.550269
hao1	0.0565081	0.188596	0.764522	1060	-0.0571041	0.0272011	0.0357933	45479	0.596242	0.551013
itgav	0.00967392	0.0255042	0.704536	1060	-0.0056701	0.00348893	0.104134	45479	0.596076	0.551125
prkd2	-0.0302859	0.0583912	0.604122	865	0.00496489	0.009677	0.607912	37510	-0.595578	0.551457
il2ra	-0.0283372	0.0650698	0.663299	1042	0.0107396	0.00851875	0.207423	44784	-0.595455	0.55154
ppp1r14d	-0.0360975	0.0533227	0.498606	894	-0.00402283	0.00792721	0.611827	38726	-0.59498	0.551857
mapt	-0.020588	0.0725744	0.776712	1025	0.0229156	0.0108614	0.034879	44031	-0.592832	0.553294
letm1	-0.0400572	0.0773705	0.604774	894	0.00624508	0.0109986	0.570171	38726	-0.592492	0.553521
cxcl12	0.0290652	0.0585869	0.619926	1042	-0.00595761	0.00836824	0.476511	44249	0.591786	0.553994
itpa	-0.0441837	0.0880605	0.615977	865	0.00859556	0.0141511	0.54358	37510	-0.59176	0.554011
gpi	0.0342684	0.0628929	0.58598	900	-0.00340582	0.0099698	0.732643	38840	0.591634	0.554096
dnmbp	0.0322278	0.0804137	0.688668	1041	-0.0159631	0.0131829	0.225942	44759	0.591394	0.554257
casp4	0.15606	0.239984	0.515671	884	0.0126319	0.0350315	0.718411	38105	0.591392	0.554258
sdc4	0.0472237	0.0715878	0.509616	1052	0.00451436	0.00961302	0.638637	45128	0.591294	0.554324
bax	0.0644822	0.122962	0.600108	1024	-0.00904071	0.0188024	0.630643	43958	0.591064	0.554478
casp7	0.0757738	0.117288	0.518416	895	0.00571819	0.0174686	0.743411	38704	0.590777	0.55467
cst1	-0.090363	0.15403	0.557607	769	0.00138559	0.0217778	0.94927	33831	-0.589787	0.555333
pdcl2	0.0458167	0.0795887	0.56499	862	-0.00154218	0.0112254	0.890729	37377	0.589214	0.555718
tmod4	0.0397429	0.0555443	0.474485	862	0.00667066	0.00845309	0.430036	37377	0.588642	0.556101
inpp1	0.0319004	0.0722932	0.659114	1043	-0.0111674	0.0112823	0.32227	44888	0.588613	0.556121
rbm25	0.0460501	0.0638241	0.470789	862	0.00809249	0.00959755	0.399132	37377	0.58811	0.556458
cd3d	0.0247021	0.0488058	0.612895	867	-0.00428769	0.00714721	0.54857	37546	0.587714	0.556724
shisa5	-0.0255192	0.0563538	0.650774	897	0.00772238	0.00535619	0.149376	38800	-0.587227	0.557051
aifm1	0.0686329	0.152407	0.652569	1041	-0.0217532	0.0220845	0.324632	44816	0.586928	0.557252
slurp1	-0.0321986	0.0604251	0.594259	887	0.00352158	0.00770285	0.647545	38519	-0.586404	0.557604
prr4	0.0505388	0.0987255	0.608843	871	-0.00795141	0.0145554	0.584872	37675	0.586117	0.557797
mybpc2	0.0756551	0.131957	0.566568	880	-0.00226368	0.0174462	0.896763	37767	0.585391	0.558285
dut	-0.0858699	0.152685	0.573985	893	0.00438316	0.0214689	0.838227	38629	-0.58535	0.558313
arhgef10	-0.0785807	0.129549	0.544291	894	-0.00189168	0.0195765	0.923021	38726	-0.585323	0.558331
nrcam	0.0206106	0.0448625	0.64603	1052	-0.0058702	0.00588633	0.318644	45128	0.585249	0.55838
fbln2	0.0287129	0.0538882	0.594289	897	-0.00293052	0.00644802	0.649484	38800	0.583045	0.559863
mocs2	0.0491893	0.0883451	0.577816	880	-0.00296627	0.0140965	0.833336	37950	0.582987	0.559902
pi16	-0.0275018	0.0381009	0.470596	900	-0.00513878	0.00506414	0.310237	38840	-0.581826	0.560684
apoa2	-0.049123	0.078585	0.532069	900	-0.00315295	0.0101379	0.755798	38840	-0.580165	0.561804
lrp11	-0.0190288	0.0603459	0.752575	1052	0.016239	0.00746778	0.0296699	45128	-0.580002	0.561913
il1a	-0.0392229	0.0861329	0.648933	1042	0.0111013	0.011803	0.346943	44249	-0.578853	0.562688
cep112	0.0264741	0.0513056	0.605981	865	-0.00370305	0.00946052	0.695488	37510	0.578433	0.562972
cenpf	0.0428652	0.0790658	0.587856	884	-0.00335291	0.0116275	0.773072	38105	0.578331	0.56304
vat1	0.00978788	0.0293851	0.739134	1043	-0.00736747	0.00412544	0.0741282	44888	0.578141	0.563169
eno1	0.0575859	0.110267	0.601614	1048	-0.00682392	0.0164154	0.677629	45046	0.577759	0.563427
lif	0.0397863	0.0697881	0.568734	1025	-0.00100406	0.0107807	0.925796	44031	0.577638	0.563509
dkk3	0.0201267	0.0454488	0.65797	1064	-0.00633686	0.00611876	0.300374	45660	0.577065	0.563895
sumf2	-0.0407378	0.0736771	0.580433	1060	0.00224274	0.0109743	0.838071	45500	-0.576998	0.563941
tff2	0.0650137	0.0984759	0.509271	1053	0.00779768	0.0122501	0.524427	45235	0.576572	0.564229
myo6	-0.0318672	0.0590092	0.589306	894	0.00238014	0.00764041	0.755407	38726	-0.575569	0.564907
ids	0.00849844	0.0136023	0.53225	1060	0.000604741	0.00182098	0.739817	45599	0.57519	0.565163
ctag1a_ctag1b	-0.0319026	0.0610495	0.601406	881	0.00368459	0.0103706	0.722372	38041	-0.574691	0.5655
robo2	0.0190644	0.039468	0.629171	1060	-0.00375227	0.00476895	0.431396	45500	0.573932	0.566014
tafa5	-0.0326086	0.0648333	0.615099	1043	0.00483802	0.00749902	0.518831	44888	-0.573757	0.566132
tnf	-0.0316564	0.0600656	0.598286	1029	0.00310069	0.0079959	0.698177	44203	-0.573593	0.566243
sult2a1	0.0273749	0.0845646	0.746218	1050	-0.0215735	0.0118553	0.0688062	45034	0.573223	0.566494
plin3	-0.0314669	0.0584184	0.590245	1052	0.0023537	0.00903594	0.794493	45128	-0.572134	0.567231
kiaa1549	-0.0827773	0.106488	0.437167	884	-0.0213059	0.014495	0.141603	38105	-0.571988	0.56733
fuca1	-0.0788951	0.12153	0.516362	1058	-0.00869592	0.0172342	0.613861	45371	-0.571907	0.567385
ctrb1	-0.0534516	0.0849984	0.529582	1047	-0.00443931	0.0114098	0.697221	45114	-0.5715	0.567661
lamp1	0.0319871	0.0433297	0.460577	869	0.0070202	0.00580831	0.226806	37720	0.571101	0.567931
hras	0.0982705	0.152674	0.519963	881	0.010307	0.0203772	0.612994	38039	0.571088	0.56794
gipr	-0.0301623	0.072483	0.67742	859	0.0114887	0.00971401	0.236937	37668	-0.56954	0.56899
stk11	0.0594668	0.101123	0.556618	1030	0.00132489	0.0152982	0.930987	44275	0.568495	0.569699
hbz	0.0859272	0.153659	0.57616	900	-0.00219909	0.0216739	0.919184	38800	0.567898	0.570105
reg1a	-0.0377692	0.0815028	0.643168	1039	0.00887115	0.0101998	0.384448	44850	-0.567825	0.570154
ahnak2	0.0315142	0.0470646	0.503293	880	0.00456696	0.00609137	0.453415	37767	0.567823	0.570155
sat2	-0.0790501	0.0936481	0.398833	884	-0.0254262	0.0142892	0.0751813	38105	-0.566059	0.571354
pbk	0.0163765	0.0448541	0.715123	862	-0.00926029	0.00644844	0.150996	37377	0.565742	0.571569
adamts13	0.0159388	0.0353937	0.652566	1064	-0.00425902	0.00480456	0.375377	45660	0.565474	0.571751
thy1	-0.0333417	0.0522341	0.523409	1060	-0.00360969	0.00611596	0.555054	45500	-0.565344	0.57184
traf3	0.0236195	0.0507754	0.641924	859	-0.00541738	0.00782974	0.489006	37668	0.565188	0.571946
cd84	0.0247189	0.0453862	0.586121	1050	-0.00117125	0.00648152	0.8566	45034	0.564711	0.57227
eif2ak2	0.0734347	0.147526	0.618767	888	-0.0108082	0.0229963	0.638359	38498	0.564224	0.572602
havcr1	0.0519878	0.114344	0.649446	1058	-0.0128958	0.0131674	0.327398	45413	0.563718	0.572946
stx6	-0.0519388	0.102561	0.612671	1028	0.00640642	0.0141859	0.651555	44017	-0.563519	0.573081
arg2	-0.0262431	0.0611925	0.668128	893	0.00860745	0.00905335	0.341738	38610	-0.563391	0.573169
mdk	0.0352541	0.0757355	0.641678	1049	-0.00779862	0.0106976	0.466003	45103	0.562874	0.573521
dnph1	0.046762	0.075354	0.535022	1052	0.00395876	0.0109574	0.717887	45243	0.562117	0.574037
qpct	0.0240992	0.0420233	0.566448	1057	0.000285074	0.005508	0.958723	45151	0.561882	0.574196
tnr	0.0372213	0.064648	0.564907	1041	0.000565755	0.00898132	0.949773	44759	0.561608	0.574383
megf9	0.017451	0.0270912	0.519614	1062	0.00207123	0.00433184	0.632552	45513	0.560581	0.575083
lamtor5	-0.0411898	0.0544441	0.449519	893	-0.0103333	0.00860964	0.230069	38610	-0.5598	0.575616
slc9a3r2	-0.0268412	0.0718906	0.708968	893	0.0138047	0.0105182	0.189372	38629	-0.55943	0.575868
stc1	0.0403198	0.0714971	0.572917	1060	1.79421e-05	0.00927725	0.998457	45500	0.558999	0.576162
gfod2	-0.0607732	0.181862	0.738319	1028	0.0418736	0.026135	0.109118	44017	-0.55868	0.57638
pikfyve	-0.0461365	0.0719536	0.521566	859	-0.00545558	0.0117936	0.643664	37668	-0.557933	0.57689
ebi3_il27	-0.0331924	0.0480653	0.489988	1057	-0.00621841	0.00635313	0.327687	45412	-0.556356	0.577967
comt	0.0705491	0.114165	0.536742	1010	0.0063011	0.017642	0.720971	43804	0.556165	0.578098
igsf21	0.0226713	0.0544158	0.677051	880	-0.00792717	0.00826275	0.33737	37767	0.555935	0.578255
shbg	0.0191367	0.072759	0.792599	900	-0.0217497	0.0114059	0.0565423	38840	0.555164	0.578783
washc3	0.0350834	0.102488	0.732193	895	-0.0224883	0.0160507	0.161198	38704	0.554975	0.578912
fgf5	0.0344408	0.0499103	0.490315	1042	0.0064807	0.00689112	0.346996	44249	0.554942	0.578934
zcchc8	0.0412462	0.0865777	0.633906	865	-0.00728149	0.0125729	0.562498	37510	0.554691	0.579106
actn2	0.0356273	0.087779	0.684935	865	-0.0134512	0.0122842	0.273523	37510	0.553719	0.579771
nppb	0.12689	0.233953	0.58768	1030	-0.00336429	0.0271341	0.901326	44275	0.553046	0.580232
lpa	0.199158	0.265698	0.453718	876	0.0508148	0.0373916	0.174158	37951	0.552869	0.580353
pla2g7	0.0305405	0.0464983	0.511448	1047	0.00460173	0.00648273	0.477804	45114	0.5525	0.580606
uros	0.0622745	0.0960126	0.516765	867	0.00867255	0.0142616	0.543122	37741	0.552222	0.580797
scrib	0.0375964	0.115701	0.745301	880	-0.0271298	0.0191505	0.156589	37767	0.551918	0.581004
igfbp1	0.0779249	0.186173	0.675622	1063	-0.0259318	0.0275401	0.346402	45587	0.551845	0.581055
ppp2r5a	0.0857833	0.165711	0.604818	893	-0.00660639	0.0247016	0.789125	38629	0.551443	0.58133
skap2	0.0603196	0.145822	0.679213	1053	-0.0209464	0.0219376	0.339674	45311	0.551096	0.581568
dcc	-0.013615	0.0321467	0.672017	867	0.00427074	0.00470889	0.364438	37741	-0.550503	0.581974
clec1b	0.067399	0.137144	0.623212	1060	-0.00888825	0.019966	0.656199	45500	0.550455	0.582007
nt5c1a	0.0262891	0.0566731	0.642853	895	-0.00510815	0.0068279	0.454387	38704	0.550028	0.5823
epo	0.0931353	0.125778	0.459178	1050	0.0234708	0.0157336	0.135768	45034	0.549586	0.582604
fyb1	0.0511579	0.130934	0.696088	1046	-0.0215699	0.0192962	0.263645	45040	0.549517	0.58265
cdkn1a	0.077626	0.148796	0.601994	1043	-0.00502548	0.0223116	0.821793	44888	0.549328	0.58278
clec2l	-0.0343204	0.0795392	0.666219	867	0.00975496	0.0107851	0.365742	37741	-0.549109	0.58293
dipk1c	-0.0291627	0.0604361	0.629547	867	0.00427104	0.00879325	0.62717	37741	-0.547444	0.584074
dok1	0.11261	0.194859	0.563475	895	0.00483623	0.0284773	0.865147	38704	0.547272	0.584192
agr3	-0.0551245	0.0911421	0.545434	1024	-0.00485627	0.0124558	0.696627	43946	-0.546457	0.584752
cabp2	-0.0469688	0.0920906	0.610162	867	0.00390561	0.013723	0.77595	37741	-0.546405	0.584788
vasp	0.0594022	0.0996757	0.551356	900	0.00437394	0.0151596	0.772946	38840	0.545797	0.585206
nsfl1c	0.0440816	0.0945725	0.64123	1060	-0.00805542	0.0139089	0.562488	45500	0.545424	0.585462
icam2	0.0181224	0.0474014	0.702302	1064	-0.00796352	0.0066092	0.228242	45660	0.545048	0.585721
il12rb1	-0.0327175	0.0566814	0.563918	1042	-0.00153895	0.00784288	0.844437	44249	-0.544875	0.585839
mesd	0.0825713	0.17277	0.632802	1047	-0.0123202	0.0253953	0.627581	45114	0.543399	0.586855
rab27b	0.065662	0.120921	0.587255	900	-0.000625552	0.0170859	0.970794	38800	0.542796	0.58727
gngt1	0.0530911	0.0872853	0.543183	867	0.00538805	0.010805	0.61802	37741	0.542379	0.587558
aif1l	0.0345862	0.0758499	0.648516	880	-0.00704437	0.0117622	0.549246	37767	0.542372	0.587562
kazn	0.0762463	0.143909	0.596368	893	-0.00267188	0.0220359	0.903493	38629	0.54207	0.58777
tnfrsf10b	0.0334215	0.067956	0.622957	1041	-0.00371148	0.00870572	0.669872	44759	0.541997	0.58782
cdc37	0.0602461	0.117397	0.607931	1052	-0.00402328	0.0175139	0.818311	45247	0.541462	0.588189
stat5b	0.0916099	0.191939	0.633258	1043	-0.0134556	0.0286767	0.638915	44888	0.541382	0.588244
scpep1	0.0378025	0.0722749	0.60108	878	-0.00169993	0.0105489	0.871978	37630	0.540828	0.588626
tarbp2	0.0349259	0.107963	0.746383	1025	-0.0241199	0.0167514	0.149911	44031	0.540443	0.588892
clstn2	0.0312549	0.071319	0.661301	1060	-0.00752327	0.00807996	0.351806	45599	0.540272	0.589009
ufd1	0.121569	0.196748	0.536805	893	0.0141817	0.0291263	0.626329	38629	0.539927	0.589248
nacc1	0.0368471	0.0716018	0.606953	893	-0.00232267	0.0117343	0.843095	38610	0.539848	0.589302
acsl1	-0.0332266	0.0624217	0.594661	865	0.000658307	0.0077097	0.931954	37510	-0.538745	0.590063
chga	0.0862553	0.172134	0.616428	897	-0.00691072	0.0178602	0.698807	38800	0.538352	0.590334
ppme1	0.0502376	0.0890187	0.572639	1043	0.00183733	0.0128161	0.886006	44888	0.53816	0.590467
ccnd2	-0.0279319	0.0526599	0.595954	884	0.000697032	0.00771117	0.927976	38105	-0.537921	0.590632
cdc123	-0.0433099	0.0966479	0.654179	862	0.00917378	0.0134847	0.496313	37377	-0.537831	0.590694
adm	-0.0219235	0.0466685	0.638616	1060	0.0033869	0.00615539	0.582162	45479	-0.537687	0.590793
pacs2	0.0497728	0.0832864	0.550257	865	0.00445647	0.013123	0.734165	37510	0.537472	0.590942
mcam	0.0268234	0.0510871	0.599658	1053	-0.000806784	0.00690888	0.907039	45299	0.535965	0.591982
ist1	0.0976907	0.137919	0.478933	885	0.0230208	0.0206101	0.264016	38359	0.53546	0.592332
mtr	0.0515789	0.0941653	0.584006	865	0.000661356	0.0136821	0.961448	37510	0.535107	0.592576
otoa	-0.0324618	0.0677238	0.631828	867	0.00422482	0.0110444	0.70207	37546	-0.534647	0.592894
dctd	0.0821723	0.133357	0.537935	880	0.0101127	0.0198267	0.610015	37950	0.534475	0.593013
nudc	0.0377568	0.0886292	0.670188	1060	-0.0100488	0.0132792	0.449216	45599	0.533435	0.593733
lrch4	0.0572215	0.0981578	0.560077	865	0.00433351	0.0146663	0.767633	37510	0.53289	0.594109
echs1	-0.0868919	0.149152	0.560332	880	-0.00670849	0.0202379	0.740283	37767	-0.532713	0.594232
reg3a	-0.0463158	0.105942	0.662069	1064	0.0104804	0.0128545	0.414898	45660	-0.532204	0.594585
rab10	-0.0391551	0.0743124	0.598395	900	0.000664245	0.0112048	0.952728	38800	-0.529847	0.596218
smpdl3b	-0.0457597	0.107343	0.669996	893	0.0116573	0.0157561	0.45939	38610	-0.529222	0.596651
tmprss5	0.0251946	0.0569758	0.658439	1037	-0.0052255	0.00810973	0.519352	44540	0.528585	0.597094
insl5	0.0885612	0.147045	0.547145	893	0.0101488	0.0202139	0.61562	38629	0.528288	0.5973
sema3g	-0.0614708	0.0699427	0.379711	880	-0.0242982	0.00904682	0.0072382	37950	-0.527081	0.598137
celsr2	-0.0220557	0.0436806	0.613734	880	0.00117537	0.00598549	0.844322	37950	-0.526916	0.598252
cd207	0.0416461	0.0619288	0.501429	1022	0.00874558	0.00809147	0.279774	44113	0.526785	0.598343
rwdd1	0.0435828	0.0875128	0.618576	1060	-0.00303234	0.0133105	0.819791	45500	0.52661	0.598465
fdx2	0.0426098	0.0852346	0.617265	865	-0.00258775	0.0118521	0.827168	37510	0.525219	0.599431
lrp2	-0.0260279	0.0515448	0.613718	867	0.0013375	0.00766701	0.861513	37741	-0.525127	0.599495
selenop	-0.014066	0.0339763	0.678977	898	0.00393865	0.00467364	0.399381	38862	-0.524975	0.5996
snx9	0.0459024	0.0909587	0.61391	1052	-0.00238759	0.0143996	0.868308	45128	0.52437	0.600021
il1rap	-0.0228704	0.0636297	0.719346	1047	0.0108527	0.00944774	0.250682	45114	-0.524243	0.60011
lsm1	0.0518107	0.0855102	0.544715	1028	0.00658074	0.0115258	0.568032	44017	0.524201	0.600139
ly6d	-0.0280845	0.0671327	0.675783	1045	0.00734132	0.00780762	0.347081	44879	-0.524165	0.600164
tnfaip2	0.0174906	0.0632822	0.782313	893	-0.0160486	0.0101739	0.114706	38629	0.523274	0.600784
pf4	0.0780888	0.144945	0.590196	890	0.00158261	0.0201894	0.93752	38570	0.522783	0.601126
col1a1	0.0114893	0.036429	0.752529	1064	-0.00773694	0.00519385	0.136327	45660	0.522488	0.601331
mdm1	-0.0165648	0.0430443	0.700458	867	0.00617048	0.00650747	0.343026	37741	-0.522248	0.601498
lyve1	-0.0158268	0.0308734	0.608333	898	0.000419332	0.00403692	0.91727	38862	-0.521776	0.601826
eddm3b	0.0365276	0.0738913	0.621187	893	-0.00239498	0.0107284	0.823352	38610	0.521289	0.602166
pcdh1	0.0196941	0.0349886	0.573643	1057	0.0013214	0.00435608	0.761628	45452	0.521081	0.602311
skap1	-0.0887787	0.108994	0.415531	1038	-0.0314498	0.0156671	0.0447147	44691	-0.52063	0.602625
grin2b	0.064476	0.0752019	0.391478	867	0.0249723	0.0118494	0.0350831	37546	0.5189	0.60383
lrrn1	-0.0334586	0.0619254	0.589103	1042	-0.0010651	0.00825364	0.897322	44249	-0.51852	0.604096
clec4g	-0.0184019	0.049061	0.707676	1050	0.00727154	0.00702245	0.300455	45034	-0.518016	0.604447
ace	-0.0186072	0.0411849	0.651524	900	0.00290296	0.00545058	0.594315	38840	-0.517769	0.604619
pgm2	-0.0405842	0.101334	0.688888	867	0.0122714	0.0125361	0.327642	37741	-0.517652	0.604701
rnf43	-0.0636766	0.0848863	0.453371	884	-0.0193433	0.0120288	0.107827	38105	-0.517102	0.605085
pdrg1	-0.0281955	0.0751702	0.707687	867	0.0110366	0.0108716	0.310028	37741	-0.516536	0.60548
leo1	0.0177124	0.0381646	0.642685	894	-0.00224399	0.00634251	0.72349	38726	0.51583	0.605973
txndc5	-0.0548934	0.0956518	0.566166	1060	-0.00502987	0.0142303	0.723743	45500	-0.515627	0.606115
ocln	0.0246534	0.0765742	0.747563	894	-0.0150873	0.00929455	0.104545	38726	0.515202	0.606412
kir2ds4	0.0364411	0.2438	0.881216	893	-0.0904075	0.0357917	0.011543	38629	0.514779	0.606707
axin1	0.0505233	0.133171	0.704478	1050	-0.0187966	0.0202356	0.352951	45034	0.514625	0.606815
dcn	0.0130669	0.036774	0.722415	1030	-0.00599876	0.00467279	0.199231	44275	0.51432	0.607028
ckap4	-0.0207078	0.0483868	0.668765	1056	0.00434905	0.00568079	0.443935	45382	-0.514312	0.607034
snap23	0.0542267	0.124181	0.662437	1052	-0.0102734	0.0181733	0.571871	45128	0.513929	0.607301
mitd1	0.0602085	0.136987	0.660377	1041	-0.01096	0.0203266	0.589755	44759	0.5139	0.607322
il18r1	0.0176559	0.0496648	0.722284	1060	-0.00808971	0.00723042	0.263212	45599	0.512981	0.607965
atxn2l	-0.0380613	0.0666699	0.568217	894	-0.00353351	0.00999386	0.723665	38726	-0.512169	0.608533
s100a16	0.0347468	0.0892324	0.697064	1024	-0.0113661	0.0128487	0.376371	43958	0.511498	0.609003
prame	-0.0141022	0.03453	0.683079	862	0.00376016	0.00532215	0.479874	37377	-0.511263	0.609167
cst3	-0.0213535	0.0529269	0.686697	1051	0.00588061	0.00609737	0.334825	45222	-0.511181	0.609224
ccl21	0.0311033	0.0566837	0.583317	1053	0.00179719	0.00859425	0.834359	45311	0.511169	0.609233
rassf2	0.0233335	0.0800691	0.770791	1028	-0.0180597	0.0122707	0.141088	44017	0.511003	0.609349
cant1	-0.0161658	0.0313032	0.605666	1049	-2.90038e-05	0.00423144	0.994531	44986	-0.510854	0.609453
hars1	0.0424111	0.106212	0.68975	1047	-0.012335	0.0161481	0.44495	45114	0.509585	0.610342
shpk	-0.0281061	0.0516975	0.58681	884	-0.00141871	0.00859201	0.86885	38105	-0.509238	0.610586
itpr1	-0.0638359	0.109217	0.559045	880	-0.00775792	0.0144266	0.590751	37767	-0.509031	0.61073
cplx2	0.0117868	0.0473173	0.803342	862	-0.0125235	0.0065481	0.0558144	37377	0.508922	0.610807
lhb	-0.0505998	0.123685	0.68255	1028	0.0129515	0.0182144	0.477052	44017	-0.508334	0.611219
tgfb1	0.0195976	0.054678	0.720102	1058	-0.0084552	0.0080406	0.293005	45526	0.507596	0.611737
lcn2	-0.0190905	0.0666647	0.774657	1014	0.0149192	0.0080484	0.0637902	43771	-0.506483	0.612518
wfikkn1	-0.0457957	0.0604051	0.448538	1038	-0.014924	0.00865401	0.0846218	44614	-0.505913	0.612918
ehd3	-0.0856456	0.169549	0.613589	880	0.000949165	0.024295	0.968836	37767	-0.505572	0.613157
grap2	0.084196	0.182637	0.644893	1052	-0.00912056	0.0267812	0.733438	45128	0.505534	0.613184
cxcl6	0.0280644	0.10719	0.793512	1060	-0.0267141	0.0159001	0.0929413	45599	0.50551	0.6132
slmap	0.0532265	0.117861	0.651665	893	-0.00695458	0.0174617	0.690429	38629	0.505097	0.613491
ntf3	0.0327334	0.0597048	0.583635	1050	0.00237424	0.00734006	0.746345	45034	0.504687	0.613779
apoc1	0.0310185	0.0580761	0.593405	897	0.0014911	0.00764444	0.84535	38788	0.504078	0.614207
icam3	0.0150209	0.0393962	0.703073	1064	-0.00501884	0.0053505	0.348242	45660	0.504045	0.61423
mri1	0.0748125	0.0989286	0.44972	867	0.0245234	0.014206	0.084306	37741	0.503175	0.614841
pla2g4a	0.0476629	0.121849	0.695756	1053	-0.0143199	0.0183505	0.435185	45311	0.503013	0.614955
tpm3	0.0391223	0.0643235	0.543207	865	0.00654315	0.00912208	0.473202	37510	0.501472	0.616039
cst7	0.0631022	0.132365	0.633654	1051	-0.00391205	0.0193268	0.839593	45165	0.500972	0.616391
ccdc134	0.0253105	0.0705897	0.720011	893	-0.0103825	0.0101285	0.305334	38610	0.500514	0.616713
klrd1	-0.0325557	0.0706119	0.644856	1060	0.00309552	0.00970144	0.749669	45599	-0.500192	0.61694
drg2	0.0276931	0.075722	0.714649	1043	-0.0106314	0.011872	0.370526	44888	0.500012	0.617067
smad1	0.0588736	0.116159	0.61238	1028	0.000182115	0.0173789	0.991639	44017	0.499706	0.617282
spint1	0.0135851	0.043019	0.752224	1043	-0.00799675	0.00533983	0.134253	44963	0.49786	0.618583
col9a2	-0.0217618	0.0604797	0.719069	884	0.00870451	0.00936352	0.352574	38105	-0.497813	0.618616
fcgr2b	-0.0366302	0.0824594	0.656976	1028	0.00485159	0.0120437	0.687073	44017	-0.497776	0.618642
il15ra	-0.0149864	0.0552077	0.786095	1042	0.0127233	0.00725274	0.0793895	44249	-0.497643	0.618736
cd48	0.0289253	0.0475615	0.543209	1053	0.00506117	0.00621005	0.415078	45235	0.49753	0.618815
mtdh	0.0709439	0.135936	0.601881	859	0.00264411	0.0194418	0.891821	37668	0.497379	0.618922
pnma1	-0.0311893	0.0769801	0.685458	880	0.00749153	0.0117777	0.524731	37767	-0.496699	0.619401
taldo1	0.032296	0.0618992	0.601973	889	0.00119803	0.00955317	0.900202	38659	0.496519	0.619528
gpa33	0.0997175	0.189144	0.598164	1043	0.00482109	0.0282676	0.864577	44888	0.496205	0.61975
ifit3	-0.0186125	0.0495504	0.707285	884	0.00628475	0.00793244	0.4282	38105	-0.496145	0.619792
nrp1	-0.0240465	0.0417667	0.564919	1055	-0.00314004	0.0057049	0.58204	45372	-0.495948	0.619931
sftpd	-0.0452855	0.096938	0.640483	1052	0.00323247	0.0138948	0.816043	45128	-0.495441	0.620289
ptprz1	-0.0349436	0.0490356	0.476269	900	-0.0104293	0.00689388	0.13033	38800	-0.49506	0.620557
fes	-0.0354239	0.0680062	0.602555	1028	-0.00143511	0.00993362	0.88513	44017	-0.494541	0.620924
esm1	0.026845	0.0586714	0.647372	1051	-0.00239085	0.00729077	0.742967	45085	0.494495	0.620956
pla2g2a	-0.041571	0.0897026	0.643152	1044	0.00309395	0.0116637	0.790809	45012	-0.493766	0.621471
hla_dra	-0.0468151	0.0522566	0.370531	1042	-0.0207513	0.00748165	0.0055458	44893	-0.49373	0.621497
btn3a2	-0.0188828	0.0597352	0.751984	1050	0.0108562	0.00791914	0.17042	45034	-0.493528	0.621639
siglec7	0.0204521	0.0424095	0.629727	1052	-0.000617723	0.00599106	0.917878	45128	0.491935	0.622766
wasl	-0.038119	0.0959324	0.691206	859	0.00947326	0.0126202	0.452872	37668	-0.491865	0.622815
f10	-0.0358068	0.0682678	0.600057	900	-0.00213228	0.00545126	0.695685	38840	-0.491706	0.622927
bgn	0.0563319	0.170217	0.740756	1026	-0.0280689	0.0247896	0.25752	43943	0.490666	0.623662
ca4	-0.0175987	0.0378595	0.642139	1064	0.00112898	0.00500145	0.821412	45660	-0.490403	0.623849
ralb	-0.0150679	0.0412989	0.715313	859	0.00537288	0.00624103	0.389301	37668	-0.489391	0.624565
nectin1	0.0241574	0.0443246	0.585888	859	0.00222835	0.00683235	0.744315	37668	0.488963	0.624868
cntn4	0.018196	0.0377498	0.629896	1047	-0.000303994	0.00497484	0.951275	45114	0.485868	0.627061
pon2	0.0271611	0.049692	0.58478	1030	0.00280989	0.00734847	0.702183	44275	0.484771	0.627839
bcat1	-0.0226465	0.0441951	0.608482	900	-0.00103627	0.00641746	0.871718	38800	-0.4839	0.628457
sema3f	-0.0187884	0.0438231	0.668205	1052	0.00254952	0.00573689	0.65675	45128	-0.482792	0.629244
hpse	0.0868191	0.139422	0.53364	880	0.0190156	0.0195263	0.330138	38293	0.481618	0.630078
cd163	-0.0234164	0.0623278	0.707218	1053	0.00688281	0.00922813	0.455761	45299	-0.480885	0.630599
ipcef1	0.0300465	0.123478	0.807794	1040	-0.0299728	0.018814	0.111143	44682	0.480528	0.630852
erp29	0.0974512	0.166351	0.558148	880	0.0166715	0.0248573	0.502424	37950	0.480267	0.631037
necap2	0.0385649	0.0928477	0.677985	865	-0.00646928	0.0138369	0.640117	37510	0.479735	0.631416
git1	0.0435872	0.134402	0.745787	859	-0.0215605	0.0205917	0.295083	37668	0.479133	0.631844
prnd	0.0372052	0.0836144	0.656456	895	-0.00314913	0.0106212	0.766853	38704	0.478777	0.632097
dpy30	0.0275409	0.0857333	0.748093	1055	-0.0139614	0.0129362	0.280483	45339	0.478668	0.632175
cd40	0.0268286	0.0705772	0.703925	1051	-0.0072682	0.0104459	0.48656	45089	0.477908	0.632716
eno3	0.0293472	0.0835853	0.725594	880	-0.0110219	0.0125626	0.380297	37767	0.477605	0.632932
spp1	0.0347381	0.0748133	0.642506	1064	-0.00127543	0.009464	0.892797	45590	0.477573	0.632954
eri1	0.021053	0.0451288	0.640967	884	-0.000759627	0.00713429	0.915206	38105	0.477412	0.633069
vta1	0.0346543	0.0995845	0.727918	1060	-0.0133207	0.0148549	0.369874	45500	0.476479	0.633733
igbp1	-0.0280967	0.0858808	0.743625	894	0.0132343	0.0128177	0.301842	38726	-0.475987	0.634083
kif20b	0.038195	0.106275	0.719386	867	-0.0129426	0.0160214	0.419192	37546	0.475804	0.634214
exosc10	-0.0152415	0.0760748	0.841255	865	0.0212975	0.0125456	0.0895911	37510	-0.473902	0.63557
tyro3	-0.0235082	0.0419665	0.575486	1052	-0.00342639	0.00593789	0.563917	45128	-0.473802	0.635641
cr2	-0.0414712	0.070736	0.557813	1053	-0.00765445	0.00968459	0.429313	45299	-0.473651	0.635749
psma1	-0.0140404	0.0612248	0.818661	1028	0.0153102	0.00963741	0.112152	44017	-0.473561	0.635813
f11r	0.0239379	0.0766062	0.754738	1047	-0.0127488	0.0118136	0.280521	45114	0.473306	0.635995
lrfn2	0.0305256	0.0559172	0.58527	867	0.00368727	0.00996038	0.71124	37741	0.472528	0.63655
prkar2a	0.05034	0.110854	0.64986	893	-0.00265744	0.0171738	0.877029	38631	0.472447	0.636608
ism1	-0.02929	0.0548117	0.593196	1050	-0.00310268	0.00827407	0.70767	45034	-0.472417	0.63663
kir3dl2	-0.0921974	0.123917	0.457063	862	-0.0331125	0.0175972	0.0598863	37377	-0.472076	0.636872
oscar	-0.023934	0.0526135	0.649274	1052	0.00108929	0.00705889	0.877362	45160	-0.471381	0.637368
atox1	0.037631	0.0973597	0.699194	1052	-0.00878959	0.0149492	0.556559	45247	0.471271	0.637447
vps53	0.028831	0.107247	0.788116	1043	-0.0222194	0.016282	0.172365	44888	0.470614	0.637917
dhodh	-0.0445717	0.0717979	0.534899	865	-0.0104733	0.00981355	0.285877	37510	-0.470548	0.637964
bche	0.0212123	0.0412052	0.606826	878	0.00162839	0.00598635	0.78561	38127	0.470339	0.638112
ccl2	0.030138	0.0738934	0.683462	1040	-0.00497178	0.011103	0.654309	44682	0.469867	0.63845
p4hb	-0.0362528	0.0561248	0.518466	1042	-0.00963944	0.00822152	0.241017	44874	-0.469175	0.638945
klk12	-0.109334	0.200132	0.584972	1028	-0.0144892	0.0288153	0.615085	44017	-0.469074	0.639016
ugdh	-0.073563	0.137584	0.59301	865	-0.00828068	0.0210885	0.694571	37510	-0.469014	0.639059
syap1	0.0410801	0.0740273	0.579083	880	0.00595028	0.0120238	0.620692	37950	0.468414	0.639489
atp5po	-0.0243908	0.0551441	0.658359	1025	0.00172915	0.00869425	0.842354	44031	-0.467887	0.639866
adgrb3	-0.0277387	0.0512931	0.58877	1040	-0.00353808	0.00695137	0.610771	44682	-0.467537	0.640116
ctnna1	0.0238437	0.0426135	0.575943	867	0.00364903	0.0073992	0.621899	37546	0.466916	0.64056
ap3s2	0.0217654	0.0668034	0.744642	895	-0.00976895	0.00998007	0.327662	38704	0.466867	0.640595
nxpe4	0.0290252	0.0400413	0.468722	865	0.0100411	0.00717011	0.161398	37510	0.46669	0.640722
ehbp1	0.0447121	0.103086	0.664585	900	-0.00389274	0.015776	0.805102	38800	0.466071	0.641164
colec12	-0.0189802	0.0502368	0.705646	1051	0.00457874	0.00570814	0.422475	45085	-0.465959	0.641245
gfra1	-0.0244148	0.0500212	0.625589	1057	-0.000940836	0.00601136	0.875632	45412	-0.465927	0.641268
il20ra	0.0221911	0.0770503	0.773398	1042	-0.0139568	0.00933069	0.134713	44249	0.465744	0.641399
vcpkmt	-0.0504822	0.137731	0.714062	862	0.0141678	0.0181094	0.434016	37377	-0.465388	0.641654
mprip	-0.0062547	0.063198	0.921185	891	0.0234454	0.00918212	0.0106723	38536	-0.46507	0.641881
vtcn1	-0.0241019	0.0472599	0.610172	1028	-0.00196539	0.00660634	0.766086	44017	-0.463888	0.642728
omp	-0.0458742	0.0707298	0.51678	867	-0.0127357	0.0102068	0.212125	37546	-0.46372	0.642848
s100a3	-0.0292355	0.0559224	0.601253	893	-0.00297168	0.00936098	0.750901	38610	-0.463203	0.643219
tpsab1	-0.0361683	0.0692098	0.60137	1060	-0.00375324	0.0109497	0.731773	45522	-0.462606	0.643647
impg1	0.0176076	0.0410323	0.667946	867	-0.00158802	0.00632004	0.801609	37546	0.462365	0.643819
ern1	0.0210985	0.0504536	0.67592	893	-0.0025068	0.00787836	0.750344	38610	0.462259	0.643895
eln	0.038137	0.0627202	0.543309	900	0.00896434	0.00716112	0.210648	38800	0.462122	0.643994
cd34	-0.0184107	0.0358182	0.607357	1057	-0.00170856	0.00502835	0.73402	45357	-0.461775	0.644242
fhit	-0.0522326	0.104532	0.617407	1025	-0.00345321	0.0154545	0.823191	44031	-0.461628	0.644348
dlg4	-0.0468945	0.0983124	0.633483	895	-0.00103882	0.0149879	0.944743	38704	-0.461101	0.644726
adamtsl4	0.018635	0.0344331	0.588511	880	0.00260601	0.00491165	0.595714	37767	0.460846	0.644909
axl	-0.0173809	0.0427848	0.684649	1053	0.00250453	0.00571768	0.661365	45299	-0.460682	0.645026
chrdl2	-0.035185	0.0754311	0.640989	1052	-6.63969e-05	0.0111149	0.995234	45128	-0.460598	0.645087
tp73	-0.0226068	0.0495044	0.648029	867	0.000427747	0.00711622	0.952069	37741	-0.460569	0.645108
il21r	-0.0348518	0.0764566	0.648622	859	0.000683231	0.0114199	0.952293	37668	-0.459675	0.64575
pth	0.0817508	0.142168	0.565422	867	0.0159564	0.0168111	0.342545	37741	0.459591	0.64581
npr1	-0.024512	0.0576709	0.670919	865	0.00227746	0.00863223	0.79191	37510	-0.459405	0.645943
tax1bp1	0.0203177	0.0860961	0.813496	895	-0.0195602	0.0134261	0.145158	38704	0.457647	0.647206
fgfr4	-0.0345529	0.0754129	0.646935	880	0.00031731	0.0109425	0.976866	37950	-0.457599	0.647241
kit	-0.0147972	0.0441466	0.737554	1050	0.00559377	0.0061912	0.366264	45223	-0.457417	0.647372
ubqln3	0.0433095	0.10004	0.665179	865	-0.00255294	0.0102704	0.803694	37510	0.456045	0.648357
krt8	0.0189864	0.121248	0.875603	867	-0.0365769	0.0148466	0.0137575	37546	0.454865	0.649207
adam9	-0.0144165	0.0510948	0.777892	893	0.00898939	0.00617211	0.145275	38629	-0.454782	0.649266
rab3gap1	0.0515525	0.0911399	0.571785	867	0.0097689	0.0119879	0.415137	37546	0.45454	0.64944
timm10	-0.0230658	0.0571016	0.686351	900	0.0031194	0.00835607	0.70892	38800	-0.45374	0.650016
klk14	0.0218248	0.0683044	0.749393	1060	-0.00935688	0.00963383	0.331428	45479	0.452037	0.651243
fcgr2a	0.0248067	0.0802858	0.757398	1045	-0.0119139	0.0124805	0.339786	44918	0.451946	0.651308
ly9	0.0224355	0.0456391	0.623117	1040	0.00162858	0.00607631	0.788685	44584	0.451913	0.651332
crisp2	0.0365639	0.0830489	0.659832	1060	-0.00133634	0.0120813	0.911924	45479	0.451607	0.651552
xpnpep2	-0.031669	0.137441	0.817811	1052	0.0310174	0.0203049	0.126623	45247	-0.4512	0.651846
crip2	0.0444142	0.0584504	0.447511	1041	0.017815	0.0078444	0.023149	44759	0.451029	0.651968
brdt	-0.0314412	0.0505594	0.534195	865	-0.00839249	0.00767961	0.274476	37510	-0.450704	0.652203
nfu1	-0.0466931	0.148097	0.752618	893	0.0207261	0.0212968	0.330458	38629	-0.4506	0.652278
ung	-0.00310346	0.0474473	0.947863	893	0.0184555	0.0071508	0.00985791	38610	-0.449303	0.653213
stab2	0.0280438	0.041995	0.504441	897	0.0090143	0.00606767	0.137386	38800	0.44848	0.653807
tnfrsf12a	-0.0276114	0.0629006	0.660774	1052	0.000791992	0.00743643	0.915185	45247	-0.448438	0.653837
ogfr	0.0120801	0.0468712	0.796666	1043	-0.0091617	0.00694699	0.187242	44888	0.448298	0.653938
sestd1	0.0271223	0.0865582	0.754085	1025	-0.0120902	0.0134888	0.370089	44031	0.447616	0.65443
foxo1	0.0499912	0.119232	0.675099	1050	-0.00393572	0.0178691	0.825675	45034	0.447292	0.654664
ndrg1	-0.0432828	0.0940377	0.64542	1025	-0.000745713	0.0142122	0.958155	44031	-0.447261	0.654686
enox2	0.0140182	0.0350223	0.68906	865	-0.00185551	0.00586626	0.751774	37510	0.447019	0.654861
cacybp	0.0728193	0.143913	0.612987	880	0.00778718	0.0215694	0.71808	37879	0.446894	0.654951
diablo	0.0677561	0.153179	0.658339	1050	-0.0013737	0.022943	0.952256	44983	0.446323	0.655364
appl2	0.0694452	0.15512	0.654489	880	-0.000519181	0.0236016	0.98245	37950	0.445904	0.655667
fut8	-0.0321409	0.0804868	0.689732	1041	0.00412574	0.0119862	0.730691	44759	-0.445676	0.655832
ptk7	-0.035627	0.056834	0.530891	1025	-0.0100893	0.0078655	0.199592	44031	-0.445095	0.656251
kiaa0319	-0.0135805	0.0491645	0.782439	895	0.00843039	0.00649424	0.194249	38704	-0.443844	0.657156
ccl20	0.0729281	0.13964	0.601599	1060	0.0104698	0.018452	0.570439	45599	0.443427	0.657457
siglec8	-0.0367983	0.0748104	0.622922	880	-0.00347733	0.00957058	0.716357	37767	-0.441805	0.658631
crhr1	-0.0304453	0.0885623	0.731088	1030	0.00905057	0.012786	0.479043	44275	-0.441391	0.65893
spon2	-0.0326919	0.0594225	0.582328	1047	-0.00630798	0.00732795	0.389347	44909	-0.440667	0.659454
grp	-0.0338995	0.0868019	0.696233	880	0.00464109	0.0111129	0.67622	37767	-0.440412	0.659639
aldh1a1	0.0215433	0.0775254	0.781154	1047	-0.0129759	0.0115762	0.262332	45114	0.44038	0.659662
tpbgl	0.0339723	0.0573798	0.553966	867	0.00843624	0.00871109	0.332826	37741	0.439994	0.659941
magea3	0.064362	0.131249	0.623987	884	0.00614917	0.0175398	0.725903	38105	0.439621	0.660212
atp2b4	-0.0354929	0.0915653	0.69839	865	0.00505565	0.0133652	0.705232	37510	-0.438194	0.661245
pga4	0.0558665	0.148257	0.706395	900	-0.00939541	0.0146284	0.5207	38840	0.438068	0.661337
cd59	-0.0167799	0.0444296	0.705752	1019	0.00279038	0.00481446	0.562199	43494	-0.437915	0.661448
anp32c	-0.0168443	0.0473063	0.721875	880	0.00416306	0.00858249	0.627633	37767	-0.436938	0.662156
irag2	0.0152807	0.114651	0.893998	1030	-0.0354626	0.0189289	0.061011	44275	0.436678	0.662345
lrrc59	-0.0377301	0.0697881	0.588892	900	-0.00700588	0.00998103	0.482734	38800	-0.435815	0.662971
il1r1	-0.0230532	0.0398701	0.563249	1046	-0.00556978	0.00467689	0.233693	45037	-0.435523	0.663183
pgd	0.0298478	0.0755035	0.692704	900	-0.00338967	0.0112751	0.763695	38800	0.435383	0.663284
pfdn6	-0.0338952	0.0983086	0.730341	867	0.00930633	0.0135886	0.493435	37741	-0.43531	0.663338
orm1	-0.00798365	0.0299884	0.790128	896	0.00519915	0.0042903	0.225581	38719	-0.435166	0.663442
umod	0.0291893	0.090299	0.746569	1062	-0.0103876	0.0113481	0.36001	45511	0.434865	0.66366
otud6b	0.0350588	0.0795155	0.659389	893	9.58042e-05	0.0122786	0.993775	38629	0.43455	0.663889
sh3glb2	0.0513716	0.0989912	0.603924	895	0.00797233	0.0141456	0.573037	38704	0.434006	0.664284
anxa10	0.0464462	0.124297	0.708727	1025	-0.0079124	0.0168978	0.639608	44031	0.433342	0.664766
sptbn2	-0.0165189	0.0436709	0.705332	867	0.00262137	0.00674174	0.697406	37546	-0.433152	0.664904
tspan7	-0.0663698	0.135656	0.624788	867	-0.00701732	0.0198191	0.723289	37546	-0.432927	0.665068
fkbp4	0.0254037	0.0590055	0.666899	1041	-0.000449573	0.0092112	0.961073	44759	0.432907	0.665082
phldb1	0.0313367	0.0775996	0.686438	893	-0.0025397	0.0112375	0.8212	38629	0.432047	0.665707
adgrg1	-0.100304	0.145666	0.491235	1043	-0.0370482	0.0147473	0.0120016	44888	-0.432045	0.665708
ncam1	0.0120005	0.0459423	0.793983	1053	-0.00800229	0.00641239	0.212059	45299	0.43121	0.666315
nlgn1	-0.0538247	0.107142	0.615538	867	-0.0072748	0.014185	0.608058	37741	-0.43071	0.666679
pcdh7	0.0212689	0.0557148	0.702742	893	-0.00291984	0.0072656	0.68778	38629	0.430507	0.666827
serpina1	0.0040156	0.0115929	0.729138	885	-0.00102571	0.00167666	0.540702	38126	0.430382	0.666918
nxph1	-0.0192369	0.0527392	0.71537	1025	0.00369597	0.00801318	0.644632	44031	-0.429901	0.667268
tsnax	0.0369063	0.0550345	0.502654	865	0.0129779	0.00840041	0.122375	37510	0.429809	0.667334
ccl22	0.0401501	0.0815086	0.622409	1042	0.00483792	0.0112022	0.665835	44649	0.429198	0.667779
spart	0.0430978	0.103357	0.676794	880	-0.00157179	0.0164119	0.923703	37950	0.426842	0.669495
epb41l5	-0.0355656	0.0927668	0.701527	867	0.00436853	0.0131775	0.740258	37741	-0.4262	0.669962
layn	-0.0258186	0.0652716	0.692513	1038	0.00215101	0.00699247	0.758374	44691	-0.426074	0.670054
shd	0.0675475	0.116573	0.562442	864	0.0174948	0.0178995	0.328382	37436	0.424394	0.671278
dag1	0.0263198	0.0636151	0.679153	1053	-0.000945259	0.00997217	0.924482	45311	0.423424	0.671986
msln	0.0484018	0.0917988	0.598126	1041	0.00922335	0.0126183	0.464813	44823	0.42281	0.672434
cd160	-0.0197682	0.0762341	0.795448	1060	0.0127238	0.00969629	0.189448	45599	-0.422807	0.672436
pebp1	0.0376877	0.0805522	0.639977	1047	0.0032429	0.0123498	0.79287	45114	0.422671	0.672536
scgb2a2	0.0309377	0.0460196	0.501591	865	0.0113093	0.00650216	0.0819883	37510	0.422328	0.672786
agr2	-0.0881796	0.143394	0.538729	1015	-0.0270736	0.0209963	0.197251	43675	-0.421644	0.673285
ceacam18	-0.0578614	0.0938606	0.53775	884	-0.0178472	0.0142896	0.211686	38105	-0.421459	0.67342
fabp3	0.042976	0.0911719	0.637489	900	0.00436275	0.010786	0.685859	38800	0.420588	0.674056
ces1	-0.0635878	0.128313	0.620304	1056	-0.00916633	0.0178516	0.607621	45233	-0.420084	0.674424
agrn	-0.0318518	0.061104	0.602288	1053	-0.00601561	0.00726909	0.407923	45311	-0.419862	0.674586
lgals8	0.0287936	0.0837075	0.730931	1060	-0.00674387	0.0126814	0.594872	45500	0.419754	0.674665
cebpb	0.0305759	0.053467	0.567539	1030	0.00788873	0.00806064	0.327747	44275	0.419579	0.674793
st13	0.0446799	0.0829844	0.590429	880	0.00951764	0.0119044	0.424003	37950	0.419427	0.674904
efcab14	-0.0113396	0.0499653	0.820515	893	0.00973143	0.00566262	0.0857063	38629	-0.419031	0.675194
pof1b	0.021466	0.0668105	0.748064	859	-0.00678167	0.00948341	0.474546	37668	0.418607	0.675503
f3	-0.0149059	0.0426236	0.726627	1053	0.0030798	0.00555653	0.579399	45197	-0.418425	0.675637
klk3	0.0703985	0.153458	0.646527	897	0.00573953	0.0182848	0.753602	38800	0.418386	0.675665
neo1	-0.0149162	0.0340885	0.661802	894	-0.00057396	0.00457945	0.90026	38726	-0.41699	0.676685
stambp	0.0302757	0.0878804	0.730533	1038	-0.00679199	0.0134742	0.614212	44691	0.416925	0.676734
tdp1	-0.0477585	0.0986781	0.628517	893	-0.00619148	0.0150342	0.680469	38610	-0.416433	0.677093
cep43	0.026105	0.0940949	0.781504	1020	-0.0134274	0.0145753	0.356926	43915	0.415183	0.678008
prap1	0.032303	0.0678336	0.634042	897	0.00389339	0.00944276	0.680111	38800	0.414814	0.678278
pyy	0.0745814	0.162319	0.64601	865	0.00671343	0.0205432	0.743824	37510	0.414806	0.678284
snap25	0.0199386	0.0713583	0.779993	867	-0.00992226	0.00984651	0.313608	37546	0.414536	0.678481
cd1c	0.00865176	0.0382866	0.821266	1052	-0.00731979	0.00502736	0.145402	45247	0.413607	0.679162
fdx1	0.0314753	0.100701	0.75469	865	-0.010496	0.0131656	0.425323	37510	0.413272	0.679407
nptx1	0.0203555	0.0635892	0.74895	1047	-0.00614195	0.00854095	0.472072	45114	0.412989	0.679615
fli1	0.0533102	0.156407	0.733292	1028	-0.0119301	0.0231191	0.605838	44017	0.412635	0.679874
spink6	-0.0286932	0.0800623	0.720126	1060	0.00465038	0.0113787	0.682768	45479	-0.412327	0.6801
cd46	-0.0202804	0.0457569	0.657698	1045	-0.00131518	0.00592226	0.824257	44853	-0.41105	0.681036
src	0.0441001	0.171622	0.797259	1050	-0.0271884	0.0251533	0.279743	45177	0.410991	0.681079
timp1	0.0186887	0.0478502	0.696198	1036	-0.00109873	0.00599973	0.854697	44632	0.410316	0.681574
upk3bl1	-0.0339287	0.070413	0.630031	880	-0.00469026	0.011305	0.678231	38030	-0.409991	0.681812
nedd9	-0.0127731	0.0465609	0.783897	859	0.00653375	0.00715925	0.361443	37668	-0.409841	0.681922
rras	-0.0398001	0.176509	0.821656	867	0.0333464	0.0272738	0.221469	37741	-0.409546	0.682139
ddr1	-0.0202623	0.0376682	0.590748	1060	-0.00471816	0.00476093	0.321683	45500	-0.409403	0.682244
dkkl1	0.0115818	0.112602	0.918097	1043	-0.0349841	0.0177611	0.048878	44888	0.408494	0.682911
il1b	0.0426243	0.0821562	0.603997	1037	0.00873592	0.0118791	0.462097	44030	0.408242	0.683096
farsa	0.0397512	0.0947204	0.674832	867	0.000636973	0.014586	0.965168	37741	0.408133	0.683176
ctsf	-0.0225659	0.0581395	0.697996	1052	0.00138542	0.00837416	0.868598	45247	-0.407755	0.683454
ift20	0.0268221	0.0628567	0.669691	867	0.000925302	0.00920668	0.919945	37741	0.407647	0.683533
cmip	0.0498657	0.11717	0.670513	893	0.00165207	0.0173109	0.92397	38610	0.407067	0.683959
l3hypdh	-0.0460843	0.123878	0.70997	900	0.00483964	0.0186686	0.795452	38800	-0.406493	0.684381
pcbp2	-0.0264175	0.101889	0.795481	894	0.015418	0.0150406	0.305324	38726	-0.406197	0.684598
il12b	-0.0395325	0.0849498	0.641768	1060	-0.00470682	0.0117112	0.687755	45599	-0.406114	0.684659
cd74	-0.0301176	0.0571151	0.598086	1060	-0.00673773	0.00730958	0.356655	45500	-0.406035	0.684717
edn1	0.0271233	0.055673	0.626247	880	0.00438951	0.00615797	0.475963	37767	0.405869	0.684839
calcb	-0.0386822	0.0600928	0.519931	895	-0.0140862	0.00812273	0.0828962	38704	-0.405611	0.685028
fos	0.029274	0.0515522	0.570284	859	0.00815225	0.0074867	0.276206	37316	0.405463	0.685137
gnas	-0.0366543	0.119043	0.758225	894	0.0120888	0.018152	0.505429	38726	-0.404779	0.68564
acta2	0.0585832	0.0760674	0.441389	1030	0.0275872	0.00905144	0.00230641	44275	0.404627	0.685752
arhgap25	0.0185947	0.0789918	0.813945	1028	-0.0137534	0.0126144	0.27559	44017	0.404388	0.685927
igfbp2	-0.0447346	0.0962309	0.642122	1064	-0.00540474	0.0142051	0.703591	45590	-0.404321	0.685976
gpc5	0.0453597	0.0809444	0.575341	1041	0.0123278	0.0116155	0.288548	44759	0.403944	0.686254
edar	-0.0454969	0.120768	0.70645	1050	0.00386327	0.0191219	0.839891	45034	-0.403691	0.68644
vsig10l	-0.0253035	0.0454373	0.57775	865	-0.00677925	0.00695369	0.329609	37510	-0.402995	0.686952
dnajc9	0.0695016	0.113399	0.540104	893	0.0233771	0.0161734	0.148355	38629	0.40267	0.687191
nars1	0.0265515	0.0699104	0.70419	894	-0.00180787	0.00981198	0.853817	38726	0.401716	0.687893
erbb4	0.0056163	0.0371504	0.879865	1052	-0.00939616	0.00502609	0.0615629	45247	0.400452	0.688824
traf2	0.0145317	0.0938132	0.87693	1050	-0.0234751	0.0150215	0.118115	45034	0.400036	0.68913
snu13	-0.0468726	0.0842417	0.578078	865	-0.0127622	0.0136214	0.348805	37510	-0.39972	0.689362
trim5	-0.0578535	0.119173	0.627453	1050	-0.00972304	0.01807	0.590527	45034	-0.399307	0.689667
lgals7_lgals7b	-0.00844168	0.0659873	0.89823	1048	0.0181252	0.00867873	0.0367617	44970	-0.399168	0.689769
ccl4	0.06443	0.101655	0.526345	1051	0.0235022	0.0137711	0.0878968	45165	0.398968	0.689916
alcam	-0.019712	0.0300014	0.5113	1064	-0.00766241	0.00401982	0.0566358	45660	-0.398077	0.690573
fabp6	-0.0210493	0.087077	0.809036	1030	0.0138966	0.0115899	0.230524	44205	-0.397813	0.690768
extl1	0.0322988	0.0728773	0.657736	865	0.00309593	0.00996325	0.756004	37510	0.39702	0.691352
brd3	-0.0148437	0.0663905	0.823136	865	0.0117235	0.0101281	0.247069	37510	-0.395588	0.692409
adamts15	-0.0281375	0.0701533	0.688439	1043	-0.000122235	0.00993348	0.990182	44888	-0.3954	0.692548
lactb2	0.034099	0.087753	0.697667	1052	-0.000968962	0.0138076	0.944054	45128	0.394764	0.693017
adra2a	0.030748	0.104873	0.769445	865	-0.0110784	0.0151409	0.464362	37510	0.394737	0.693037
chmp6	0.0390053	0.0804679	0.627986	900	0.00696449	0.0117681	0.55398	38800	0.39399	0.693589
clstn3	0.0223436	0.0497401	0.653392	895	0.00260327	0.00641585	0.684924	38704	0.393608	0.69387
prc1	-0.0286986	0.0702334	0.682919	893	-0.000811249	0.00936375	0.93096	38610	-0.393583	0.693889
saa4	0.0221247	0.0425946	0.603593	898	0.00517664	0.00651858	0.427121	38862	0.393313	0.694088
cracr2a	0.00539475	0.111374	0.961377	1028	-0.0389863	0.0182622	0.0327821	44017	0.393235	0.694146
lair1	-0.0231564	0.0674333	0.731369	1051	0.00352527	0.00777594	0.650295	45085	-0.39307	0.694268
ahsp	0.0361143	0.119519	0.762587	1046	-0.0113574	0.0175644	0.517886	45040	0.39297	0.694342
il12rb2	-0.0195344	0.060558	0.747097	859	0.00450874	0.00876645	0.607033	37668	-0.392931	0.694371
hhex	0.042999	0.107578	0.689473	895	0.00027095	0.0161182	0.986588	38704	0.392798	0.694469
msmb	0.00736265	0.107947	0.945635	1050	-0.0354207	0.0147568	0.0163859	45019	0.392684	0.694553
ppie	-0.040884	0.0821669	0.61891	884	-0.00830335	0.0128803	0.519155	38105	-0.391734	0.695255
bola1	0.0314334	0.0852188	0.712326	867	-0.00218891	0.0114087	0.84785	37546	0.391052	0.695759
apod	0.0261624	0.0674645	0.698264	862	-0.00044417	0.0091614	0.961332	37093	0.390793	0.695951
lrrc38	-0.00713438	0.0719278	0.921012	867	0.02124	0.0100783	0.0350798	37741	-0.390668	0.696042
ldlr	0.031927	0.0794432	0.68785	1056	0.000654577	0.0115349	0.954747	45219	0.389561	0.696861
eif4ebp1	0.0506141	0.0927892	0.585544	1052	0.0141039	0.0137815	0.306127	45128	0.389204	0.697125
clint1	-0.033575	0.0738431	0.649455	862	-0.00458581	0.00988666	0.642767	37377	-0.389106	0.697198
cxcl9	0.0208771	0.0978024	0.831008	1053	-0.0174495	0.0138192	0.206702	45311	0.388024	0.697998
ddx58	0.0179202	0.0767983	0.815543	1028	-0.0122156	0.0121576	0.315011	44017	0.387576	0.69833
tnfsf12	-0.0182851	0.0419982	0.663378	1060	-0.00185157	0.00598764	0.757146	45599	-0.387373	0.69848
atp1b2	0.0262852	0.0424855	0.536287	865	0.00971427	0.00662815	0.142763	37510	0.385375	0.699959
nptn	-0.0707415	0.115473	0.540262	1028	-0.0257746	0.0169406	0.12815	44017	-0.38529	0.700023
lypla2	0.0737677	0.146755	0.615334	867	0.0167297	0.0223586	0.454318	37546	0.384227	0.70081
snca	0.0984422	0.165791	0.552817	880	0.0341052	0.0241856	0.158506	37950	0.383997	0.70098
c8b	-0.0108222	0.0442736	0.806947	898	0.00633883	0.00629012	0.313583	38862	-0.383759	0.701157
bcl2l1	0.0731939	0.140856	0.603447	895	0.0185722	0.0206416	0.368261	38704	0.383686	0.701211
amfr	0.0428593	0.0874142	0.624026	1025	0.00892395	0.0136068	0.511928	44031	0.383594	0.70128
ndufs6	0.0514867	0.111199	0.643453	1028	0.00844456	0.0164569	0.607863	44017	0.382902	0.701792
ofd1	-0.041571	0.0901629	0.644866	884	-0.00666278	0.0137402	0.627742	38105	-0.382749	0.701906
rgs8	-0.0354194	0.0974627	0.716369	1042	0.00222936	0.0135675	0.869483	44249	-0.3826	0.702017
med21	0.0396747	0.0684516	0.562334	865	0.0131966	0.0104589	0.207045	37510	0.382378	0.702181
crhbp	0.0158171	0.0458856	0.730383	1051	-0.0018719	0.00595699	0.753344	45085	0.382295	0.702242
ccl15	0.0258548	0.0674673	0.701634	1064	-0.000151917	0.00894136	0.986444	45660	0.38213	0.702365
tymp	0.021871	0.0860181	0.799345	1046	-0.0114201	0.0139205	0.412005	44845	0.382053	0.702422
[truncated: 922 more rows]

## Sheet: Sup 8
Supplementary Table S8. Pathways modulated by the plasma protein showing heterogenety between atrial fibrillation status and sex-heterogenous variants.
SNP	Category	term ID	term description	genes mapped	genes in set	enrichment score	direction	false discovery rate	method
rs6843082	Reactome	HSA-1433557	Signaling by SCF-KIT	12	43	4.72371	top	0.0028	afc
rs6571678	WikiPathways	WP2037	Prolactin signaling pathway	21	76	2.40191	bottom	0.0056	ks
rs6571678	WikiPathways	WP3303	RAC1/PAK1/p38/MMP2 pathway	30	68	2.14956	bottom	0.0056	ks

## Sheet: Sup 9
Supplementary Table S9. Evaluation of confounding factors for the replicated variants
Phenotype	rsid	EA	OA	CHR	POS	AC	minor_AF	beta	se	pval	n_cases	n_controls	n_complete_samples
Smoking status: Current	rs6843082	A	G	4	111718067	580586	0.192971	-0.0021732	0.000903142	0.0161167	37088	322618	359706
Smoking status: Current	rs6571678	G	A	14	35185345	108820	0.151262	0.0008936	0.000995896	0.369569	37088	322618	359706
Type 2 diabetes	rs6843082	A	G	4	111718067	582992	0.192966	-2.7717e-06	0.000147553	0.985013	888	360306	361194
Type 2 diabetes	rs6571678	G	A	14	35185345	109243	0.151225	-7.98728e-05	0.000162716	0.623517	888	360306	361194
Hypertension	rs6843082	A	G	4	111718067	582992	0.192966	-0.000264163	0.000174099	0.129188	1237	359957	361194
Hypertension	rs6571678	G	A	14	35185345	109243	0.151225	4.78499e-07	0.00019199	0.998011	1237	359957	361194
Body mass index (BMI)	rs6843082	A	G	4	111718067	581064	0.192929	-0.0079132	0.014108	0.574864	N/A	N/A	359983
Body mass index (BMI)	rs6571678	G	A	14	35185345	108878	0.151227	0.00750102	0.0155568	0.629684	N/A	N/A	359983
Weight	rs6843082	A	G	4	111718067	581277	0.192931	-0.00237524	0.0419875	0.954888	N/A	N/A	360116
Weight	rs6571678	G	A	14	35185345	108923	0.151233	-0.0322182	0.0462994	0.486513	N/A	N/A	360116
Standing height	rs6843082	A	G	4	111718067	581702	0.19295	0.00195963	0.00208842	0.348075	N/A	N/A	360388
Standing height	rs6571678	G	A	14	35185345	109012	0.151243	-0.00498184	0.00230291	0.0305204	N/A	N/A	360388
LDL direct (mmol/L)	rs6843082	A	G	4	111718067	554760	0.19277	0.0018785	0.0025909	0.46841	N/A	N/A	343621
LDL direct (mmol/L)	rs6571678	G	A	14	35185345	103730	0.15094	-0.010189	0.0028593	0.00036577	N/A	N/A	343621
Cholesterol (mmol/L)	rs6843082	A	G	4	111718067	555840	0.19274	0.00261	0.0033524	0.43624	N/A	N/A	344278
Cholesterol (mmol/L)	rs6571678	G	A	14	35185345	103910	0.15092	-0.011361	0.0036997	0.0021351	N/A	N/A	344278
AC: Allele Count, EA: Effect Allele, OA: Other Allele, CHR: Chromosome, POS: Base pair position in hg19 version, minor_AF: Minor Allele Frequency, se: Standard Error, n_cases: Number of cases analyzed, n_controls: Number of controls analyzed, n_complete_samples: Number of individuals analyzed.

[truncated: 1 more sheets: Sup 10]
